# Supplementary material for: Genomic perspective on the bacillus causing paratyphoid B fever
Source: Nat Commun. 2024 Dec 10;15:10143. doi: 10.1038/s41467-024-54418-4 (PMC11632088; doi:10.1038/s41467-024-54418-4)
Supplement: Supplementary file 6 — Supplementary Data 3 [file 41467_2024_54418_MOESM6_ESM.xlsx]

## Sheet: Data 3
Gene	Non-unique Gene name	Annotation	No. isolates	No. sequences	Avg sequences per isolate	Genome Fragment	Order within Fragment	Min group size nuc	Max group size nuc	Avg group size nuc	NCTC 8299__1945__MandatoryPalestine__Human	63-90__1990__Turkey__Human	42-88__1988__Turkey__Human	173-73__1973__France__Environment	CIP 106224__1935__Canada__Unknown	52-76__1976__France__Environment	167-76__1976__France__Environment	37-73__1973__France__Human	102-66__1966__France__Animal	18-67__1967__France__Human	22-73__1973__France__Environment	ATCC10719__1939__USA__Unknown	CIP 54_103__1953__Austria__Unknown	SH15G2070__2015__China__Human	493366__2018__UKOrElsewhere__Human	SMG-20-979__1990__Spain__Human	SMG-20-968__1989__Egypt__Human	SL210010__1977__Japan__Environment	SH16G3159__2015__China__Human	B309__1941__UK__Unknown	2-57__1956__Germany__Human	524183__2018__UK__Human	416382__2017__UK__Human	SH11G0446__2011__China__Human	CIP 54_100__1941__UK__Human	B73-1117__1973__France__Human	B76__1940__UK__Unknown	72-66__1966__France__Human	76-2469__1976__USA__Human	200107858__2001__Turkey__Human	06-6420__2006__Turkey__Human	41977__2014__UK__Human	1125478__2004__UKOrElsewhere__Human	H93680197__2009__Turkey__Human	SH14SF018__2014__China__Animal	CIP A214__1898__Germany__Unknown	1190_221K_222K__1938__Sweden__Animal	138-75__1975__Spain__Human	MS160191__2016__Ireland__Human
metJ	metJ	met regulon transcriptional regulator MetJ	568	568	1	3	134	318	318	318	1	1	1	1	1	1	1	1	1	1	1	1	1	1	1	1	1	1	1	1	1	1	1	1	1	1	1	1	1	1	1	1	1	1	1	1	1	1	1
fpr	fpr	ferredoxin--NADP(+) reductase	568	568	1	3	133	747	747	747	1	1	1	1	1	1	1	1	1	1	1	1	1	1	1	1	1	1	1	1	1	1	1	1	1	1	1	1	1	1	1	1	1	1	1	1	1	1	1
yijD	yijD	YijD family membrane protein	568	568	1	3	132	360	360	360	1	1	1	1	1	1	1	1	1	1	1	1	1	1	1	1	1	1	1	1	1	1	1	1	1	1	1	1	1	1	1	1	1	1	1	1	1	1	1
lsrC	lsrC	autoinducer 2 ABC transporter permease LsrC	568	568	1	3	131	1044	1044	1044	1	1	1	1	1	1	1	1	1	1	1	1	1	1	1	1	1	1	1	1	1	1	1	1	1	1	1	1	1	1	1	1	1	1	1	1	1	1	1
yiiM	yiiM	6-hydroxyaminopurine reductase	568	568	1	3	130	690	690	690	1	1	1	1	1	1	1	1	1	1	1	1	1	1	1	1	1	1	1	1	1	1	1	1	1	1	1	1	1	1	1	1	1	1	1	1	1	1	1
argE	argE	acetylornithine deacetylase	568	568	1	3	129	1152	1152	1152	1	1	1	1	1	1	1	1	1	1	1	1	1	1	1	1	1	1	1	1	1	1	1	1	1	1	1	1	1	1	1	1	1	1	1	1	1	1	1
fdoI	fdoI	formate dehydrogenase cytochrome b556 subunit	568	568	1	3	128	636	636	636	1	1	1	1	1	1	1	1	1	1	1	1	1	1	1	1	1	1	1	1	1	1	1	1	1	1	1	1	1	1	1	1	1	1	1	1	1	1	1
group_1939		sugar porter family MFS transporter;hypothetical protein;Sugar porter family MFS transporter	568	569	1.00176	3	127	264	999	988.039	1	1	1	1	1	1	1	1	1	1	1	1	1	1	1	1	1	1	1	1	1	1	1	1	1	1	1	1	1	1	1	1	1	1	1	1	1	1	1
group_1938	rbsK	aminoimidazole riboside kinase	568	568	1	3	126	960	960	960	1	1	1	1	1	1	1	1	1	1	1	1	1	1	1	1	1	1	1	1	1	1	1	1	1	1	1	1	1	1	1	1	1	1	1	1	1	1	1
lsrR	lsrR	transcriptional regulator LsrR	568	568	1	3	125	960	960	960	1	1	1	1	1	1	1	1	1	1	1	1	1	1	1	1	1	1	1	1	1	1	1	1	1	1	1	1	1	1	1	1	1	1	1	1	1	1	1
fabR	fabR	HTH-type transcriptional repressor FabR	568	568	1	3	124	636	636	636	1	1	1	1	1	1	1	1	1	1	1	1	1	1	1	1	1	1	1	1	1	1	1	1	1	1	1	1	1	1	1	1	1	1	1	1	1	1	1
ftsN	ftsN	cell division protein FtsN	568	568	1	3	123	888	888	888	1	1	1	1	1	1	1	1	1	1	1	1	1	1	1	1	1	1	1	1	1	1	1	1	1	1	1	1	1	1	1	1	1	1	1	1	1	1	1
mobA	mobA	molybdenum cofactor guanylyltransferase MobA	568	568	1	3	122	585	585	585	1	1	1	1	1	1	1	1	1	1	1	1	1	1	1	1	1	1	1	1	1	1	1	1	1	1	1	1	1	1	1	1	1	1	1	1	1	1	1
group_1937		aldose-1-epimerase	568	568	1	3	121	888	888	888	1	1	1	1	1	1	1	1	1	1	1	1	1	1	1	1	1	1	1	1	1	1	1	1	1	1	1	1	1	1	1	1	1	1	1	1	1	1	1
group_1936		Uncharacterized protein YiiR;DUF805 domain-containing protein	568	568	1	3	120	342	429	428.234	1	1	1	1	1	1	1	1	1	1	1	1	1	1	1	1	1	1	1	1	1	1	1	1	1	1	1	1	1	1	1	1	1	1	1	1	1	1	1
higA	higA	Antitoxin component HigA of the HigAB toxin-antitoxin module contains an N-terminal HTH domain	568	568	1	3	119	447	447	447	1	1	1	1	1	1	1	1	1	1	1	1	1	1	1	1	1	1	1	1	1	1	1	1	1	1	1	1	1	1	1	1	1	1	1	1	1	1	1
group_1935	frwB	PTS fructose-like transporter subunit IIB	568	568	1	3	118	321	321	321	1	1	1	1	1	1	1	1	1	1	1	1	1	1	1	1	1	1	1	1	1	1	1	1	1	1	1	1	1	1	1	1	1	1	1	1	1	1	1
glnL	glnL	nitrogen regulation protein NR(II)	568	568	1	3	117	1050	1050	1050	1	1	1	1	1	1	1	1	1	1	1	1	1	1	1	1	1	1	1	1	1	1	1	1	1	1	1	1	1	1	1	1	1	1	1	1	1	1	1
metB	metB	cystathionine gamma-synthase	568	568	1	3	116	1161	1161	1161	1	1	1	1	1	1	1	1	1	1	1	1	1	1	1	1	1	1	1	1	1	1	1	1	1	1	1	1	1	1	1	1	1	1	1	1	1	1	1
priA	priA	primosomal protein N'	568	568	1	3	115	2199	2199	2199	1	1	1	1	1	1	1	1	1	1	1	1	1	1	1	1	1	1	1	1	1	1	1	1	1	1	1	1	1	1	1	1	1	1	1	1	1	1	1
metF	metF	methylenetetrahydrofolate reductase	568	568	1	3	114	891	891	891	1	1	1	1	1	1	1	1	1	1	1	1	1	1	1	1	1	1	1	1	1	1	1	1	1	1	1	1	1	1	1	1	1	1	1	1	1	1	1
group_1934		aryl-sulfate sulfotransferase N-terminal domain-containing protein;hypothetical protein;aryl-sulfate sulfotransferase;Putative arylsulfate sulfotransferase	568	570	1.00352	3	113	279	1791	1784.08	1	1	1	1	1	1	1	1	1	1	1	1	1	1	1	1	1	1	1	1	1	1	1	1	1	1	1	1	1	1	1	1	1	1	1	1	1	1	1
rhaB	rhaB	Rhamnulokinase;hypothetical protein;rhamnulokinase	568	570	1.00352	3	112	306	1470	1465.01	1	1	1	1	1	1	1	1	1	1	1	1	1	1	1	1	1	1	1	1	1	1	1	1	1	1	1	1	1	1	1	1	1	1	1	1	1	1	1
azlD	azlD	AzlD domain-containing protein	568	568	1	3	111	324	324	324	1	1	1	1	1	1	1	1	1	1	1	1	1	1	1	1	1	1	1	1	1	1	1	1	1	1	1	1	1	1	1	1	1	1	1	1	1	1	1
rpmE	rpmE	50S ribosomal protein L31	568	568	1	3	110	213	213	213	1	1	1	1	1	1	1	1	1	1	1	1	1	1	1	1	1	1	1	1	1	1	1	1	1	1	1	1	1	1	1	1	1	1	1	1	1	1	1
cdh	cdh	CDP-diacylglycerol diphosphatase	568	568	1	3	109	756	756	756	1	1	1	1	1	1	1	1	1	1	1	1	1	1	1	1	1	1	1	1	1	1	1	1	1	1	1	1	1	1	1	1	1	1	1	1	1	1	1
argA~~~fabY	argA;fabY	N-acetylglutamate synthase;N-acetylglutamate synthase or related acetyltransferase GNAT family;fatty acid biosynthesis protein FabY;YiiD C-terminal domain-containing protein	568	569	1.00176	3	108	336	966	940.297	1	1	1	1	1	1	1	1	1	1	1	1	1	1	1	1	1	1	1	1	1	1	1	1	1	1	1	1	1	1	1	1	1	1	1	1	1	1	1
cpxR	cpxR	envelope stress response regulator transcription factor CpxR	568	568	1	3	107	699	699	699	1	1	1	1	1	1	1	1	1	1	1	1	1	1	1	1	1	1	1	1	1	1	1	1	1	1	1	1	1	1	1	1	1	1	1	1	1	1	1
yihU	yihU	sulfolactaldehyde 3-reductase	568	568	1	3	106	897	897	897	1	1	1	1	1	1	1	1	1	1	1	1	1	1	1	1	1	1	1	1	1	1	1	1	1	1	1	1	1	1	1	1	1	1	1	1	1	1	1
group_1933		TSUP family transporter;Sulfite exporter TauE/SafE;putative membrane transporter protein	568	568	1	3	105	546	876	874.722	1	1	1	1	1	1	1	1	1	1	1	1	1	1	1	1	1	1	1	1	1	1	1	1	1	1	1	1	1	1	1	1	1	1	1	1	1	1	1
group_1932		Periplasmic protein	568	568	1	3	104	171	171	171	1	1	1	1	1	1	1	1	1	1	1	1	1	1	1	1	1	1	1	1	1	1	1	1	1	1	1	1	1	1	1	1	1	1	1	1	1	1	1
rhaD	rhaD	rhamnulose-1-phosphate aldolase	568	568	1	3	103	828	828	828	1	1	1	1	1	1	1	1	1	1	1	1	1	1	1	1	1	1	1	1	1	1	1	1	1	1	1	1	1	1	1	1	1	1	1	1	1	1	1
cptA	cptA	Phosphoethanolamine transferase CptA	568	568	1	3	102	1734	1734	1734	1	1	1	1	1	1	1	1	1	1	1	1	1	1	1	1	1	1	1	1	1	1	1	1	1	1	1	1	1	1	1	1	1	1	1	1	1	1	1
lsrG	lsrG	(4S)-4-hydroxy-5-phosphonooxypentane-23-dione isomerase	568	568	1	3	101	330	330	330	1	1	1	1	1	1	1	1	1	1	1	1	1	1	1	1	1	1	1	1	1	1	1	1	1	1	1	1	1	1	1	1	1	1	1	1	1	1	1
group_1931	rhaT	L-rhamnose/proton symporter RhaT	568	568	1	3	100	858	1035	1027.52	1	1	1	1	1	1	1	1	1	1	1	1	1	1	1	1	1	1	1	1	1	1	1	1	1	1	1	1	1	1	1	1	1	1	1	1	1	1	1
group_1930	fdxH	formate dehydrogenase subunit beta	568	568	1	3	99	903	903	903	1	1	1	1	1	1	1	1	1	1	1	1	1	1	1	1	1	1	1	1	1	1	1	1	1	1	1	1	1	1	1	1	1	1	1	1	1	1	1
lsrE	lsrE	Putative epimerase LsrE	568	568	1	3	98	765	765	765	1	1	1	1	1	1	1	1	1	1	1	1	1	1	1	1	1	1	1	1	1	1	1	1	1	1	1	1	1	1	1	1	1	1	1	1	1	1	1
qdoI	qdoI	Cupin domain protein related to quercetin dioxygenase	568	568	1	3	97	549	549	549	1	1	1	1	1	1	1	1	1	1	1	1	1	1	1	1	1	1	1	1	1	1	1	1	1	1	1	1	1	1	1	1	1	1	1	1	1	1	1
rhaR	rhaR	AraC family ligand binding domain-containing protein;HTH-type transcriptional activator RhaR	568	569	1.00176	3	96	336	969	847.677	1	1	1	1	1	1	1	1	1	1	1	1	1	1	1	1	1	1	1	1	1	1	1	1	1	1	1	1	1	1	1	1	1	1	1	1	1	1	1
yiiZ	yiiZ	putative protein YiiZ	568	568	1	3	95	984	984	984	1	1	1	1	1	1	1	1	1	1	1	1	1	1	1	1	1	1	1	1	1	1	1	1	1	1	1	1	1	1	1	1	1	1	1	1	1	1	1
metL	metL	bifunctional aspartate kinase/homoserine dehydrogenase II	568	568	1	3	94	2433	2433	2433	1	1	1	1	1	1	1	1	1	1	1	1	1	1	1	1	1	1	1	1	1	1	1	1	1	1	1	1	1	1	1	1	1	1	1	1	1	1	1
yihX	yihX	glucose-1-phosphatase	568	568	1	3	93	600	600	600	1	1	1	1	1	1	1	1	1	1	1	1	1	1	1	1	1	1	1	1	1	1	1	1	1	1	1	1	1	1	1	1	1	1	1	1	1	1	1
tpiA	tpiA	triose-phosphate isomerase	568	568	1	3	92	768	768	768	1	1	1	1	1	1	1	1	1	1	1	1	1	1	1	1	1	1	1	1	1	1	1	1	1	1	1	1	1	1	1	1	1	1	1	1	1	1	1
group_1929		Cytoplasmic protein	568	568	1	3	91	180	180	180	1	1	1	1	1	1	1	1	1	1	1	1	1	1	1	1	1	1	1	1	1	1	1	1	1	1	1	1	1	1	1	1	1	1	1	1	1	1	1
fdhD	fdhD	formate dehydrogenase accessory sulfurtransferase FdhD	568	568	1	3	90	837	837	837	1	1	1	1	1	1	1	1	1	1	1	1	1	1	1	1	1	1	1	1	1	1	1	1	1	1	1	1	1	1	1	1	1	1	1	1	1	1	1
rhaS	rhaS	HTH-type transcriptional activator RhaS	568	568	1	3	89	837	837	837	1	1	1	1	1	1	1	1	1	1	1	1	1	1	1	1	1	1	1	1	1	1	1	1	1	1	1	1	1	1	1	1	1	1	1	1	1	1	1
btuB	btuB	TonB-dependent receptor;Vitamin B12 receptor protein;BtuB;TonB-dependent vitamin B12 receptor;TonB-dependent vitamin B12 receptor BtuB	568	570	1.00352	3	88	459	1845	1838.5	1	1	1	1	1	1	1	1	1	1	1	1	1	1	1	1	1	1	1	1	1	1	1	1	1	1	1	1	1	1	1	1	1	1	1	1	1	1	1
srkA	srkA	serine/threonine protein kinase	568	568	1	3	87	987	987	987	1	1	1	1	1	1	1	1	1	1	1	1	1	1	1	1	1	1	1	1	1	1	1	1	1	1	1	1	1	1	1	1	1	1	1	1	1	1	1
group_1928	vapC	tRNA(fMet)-specific endonuclease VapC	568	568	1	3	86	375	375	375	1	1	1	1	1	1	1	1	1	1	1	1	1	1	1	1	1	1	1	1	1	1	1	1	1	1	1	1	1	1	1	1	1	1	1	1	1	1	1
frwC	frwC	PTS fructose transporter subunit EIIC	568	568	1	3	85	1080	1080	1080	1	1	1	1	1	1	1	1	1	1	1	1	1	1	1	1	1	1	1	1	1	1	1	1	1	1	1	1	1	1	1	1	1	1	1	1	1	1	1
group_1927	plsC	1-acyl-sn-glycerol-3-phosphate acyltransferase	568	568	1	3	84	909	909	909	1	1	1	1	1	1	1	1	1	1	1	1	1	1	1	1	1	1	1	1	1	1	1	1	1	1	1	1	1	1	1	1	1	1	1	1	1	1	1
ompL	ompL	Porin OmpL;porin OmpL	568	568	1	3	83	576	693	692.448	1	1	1	1	1	1	1	1	1	1	1	1	1	1	1	1	1	1	1	1	1	1	1	1	1	1	1	1	1	1	1	1	1	1	1	1	1	1	1
sbp	sbp	Sulfate-binding protein	568	568	1	3	82	990	990	990	1	1	1	1	1	1	1	1	1	1	1	1	1	1	1	1	1	1	1	1	1	1	1	1	1	1	1	1	1	1	1	1	1	1	1	1	1	1	1
fieF	fieF	CDF family cation-efflux transporter FieF	568	568	1	3	81	912	912	912	1	1	1	1	1	1	1	1	1	1	1	1	1	1	1	1	1	1	1	1	1	1	1	1	1	1	1	1	1	1	1	1	1	1	1	1	1	1	1
yiiY	yiiY	Protein yiiY;putative protein YiiY	568	568	1	3	80	390	672	671.007	1	1	1	1	1	1	1	1	1	1	1	1	1	1	1	1	1	1	1	1	1	1	1	1	1	1	1	1	1	1	1	1	1	1	1	1	1	1	1
group_1926	dctM	TRAP transporter small permease;TRAP-type C4-dicarboxylate transport system small permease component YiaM	568	568	1	3	79	486	516	515.683	1	1	1	1	1	1	1	1	1	1	1	1	1	1	1	1	1	1	1	1	1	1	1	1	1	1	1	1	1	1	1	1	1	1	1	1	1	1	1
yihS	yihS	AGE family epimerase/isomerase;N-acylglucosamine 2-epimerase;sulfoquinovose isomerase	568	572	1.00704	3	78	204	1242	1233.07	1	1	1	1	1	1	1	1	1	1	1	1	1	1	1	1	1	1	1	1	1	1	1	1	1	1	1	1	1	1	1	1	1	1	1	1	1	1	1
glpF	glpF	Glycerol uptake facilitator or related aquaporin (Major Intrinsic protein Family)	568	568	1	3	77	846	846	846	1	1	1	1	1	1	1	1	1	1	1	1	1	1	1	1	1	1	1	1	1	1	1	1	1	1	1	1	1	1	1	1	1	1	1	1	1	1	1
hslU	hslU	ATP-dependent hsl protease ATP-binding subunit HslU;HslU--HslV peptidase ATPase subunit	568	569	1.00176	3	76	513	1332	1329.61	1	1	1	1	1	1	1	1	1	1	1	1	1	1	1	1	1	1	1	1	1	1	1	1	1	1	1	1	1	1	1	1	1	1	1	1	1	1	1
group_1925	melB	Na+/melibiose symporter or related transporter	568	568	1	3	75	1335	1335	1335	1	1	1	1	1	1	1	1	1	1	1	1	1	1	1	1	1	1	1	1	1	1	1	1	1	1	1	1	1	1	1	1	1	1	1	1	1	1	1
group_1924	ushA	5'-nucleotidase;2'3'-cyclic-nucleotide 2'-phosphodiesterase/5'- or 3'-nucleotidase 5'-nucleotidase family	568	568	1	3	74	885	1557	1555.82	1	1	1	1	1	1	1	1	1	1	1	1	1	1	1	1	1	1	1	1	1	1	1	1	1	1	1	1	1	1	1	1	1	1	1	1	1	1	1
ppc	ppc	phosphoenolpyruvate carboxylase	568	568	1	3	73	2652	2652	2652	1	1	1	1	1	1	1	1	1	1	1	1	1	1	1	1	1	1	1	1	1	1	1	1	1	1	1	1	1	1	1	1	1	1	1	1	1	1	1
argB	argB	acetylglutamate kinase	568	568	1	3	72	777	777	777	1	1	1	1	1	1	1	1	1	1	1	1	1	1	1	1	1	1	1	1	1	1	1	1	1	1	1	1	1	1	1	1	1	1	1	1	1	1	1
group_1923	araC	AraC-type DNA-binding domain and AraC-containing proteins	568	568	1	3	71	852	852	852	1	1	1	1	1	1	1	1	1	1	1	1	1	1	1	1	1	1	1	1	1	1	1	1	1	1	1	1	1	1	1	1	1	1	1	1	1	1	1
murI	murI	glutamate racemase	568	568	1	3	70	852	852	852	1	1	1	1	1	1	1	1	1	1	1	1	1	1	1	1	1	1	1	1	1	1	1	1	1	1	1	1	1	1	1	1	1	1	1	1	1	1	1
azlC	azlC	AzlC family ABC transporter permease;branched-chain amino acid ABC transporter permease	568	568	1	3	69	423	663	661.732	1	1	1	1	1	1	1	1	1	1	1	1	1	1	1	1	1	1	1	1	1	1	1	1	1	1	1	1	1	1	1	1	1	1	1	1	1	1	1
typA	typA	ribosome-dependent GTPase TypA	568	568	1	3	68	1860	1860	1860	1	1	1	1	1	1	1	1	1	1	1	1	1	1	1	1	1	1	1	1	1	1	1	1	1	1	1	1	1	1	1	1	1	1	1	1	1	1	1
pfkA	pfkA	6-phosphofructokinase	568	569	1.00176	3	67	441	963	961.308	1	1	1	1	1	1	1	1	1	1	1	1	1	1	1	1	1	1	1	1	1	1	1	1	1	1	1	1	1	1	1	1	1	1	1	1	1	1	1
brkB	brkB	virulence factor BrkB family protein	568	568	1	3	66	780	780	780	1	1	1	1	1	1	1	1	1	1	1	1	1	1	1	1	1	1	1	1	1	1	1	1	1	1	1	1	1	1	1	1	1	1	1	1	1	1	1
oxyR	oxyR	Hydrogen peroxide-inducible genes activator;DNA-binding transcriptional regulator OxyR	568	569	1.00176	3	65	291	918	916.313	1	1	1	1	1	1	1	1	1	1	1	1	1	1	1	1	1	1	1	1	1	1	1	1	1	1	1	1	1	1	1	1	1	1	1	1	1	1	1
polA	polA	DNA polymerase I	568	568	1	3	64	2787	2787	2787	1	1	1	1	1	1	1	1	1	1	1	1	1	1	1	1	1	1	1	1	1	1	1	1	1	1	1	1	1	1	1	1	1	1	1	1	1	1	1
group_1922		TIGR02117 family protein	568	568	1	3	63	663	663	663	1	1	1	1	1	1	1	1	1	1	1	1	1	1	1	1	1	1	1	1	1	1	1	1	1	1	1	1	1	1	1	1	1	1	1	1	1	1	1
fsa	fsa	fructose-6-phosphate aldolase	568	568	1	3	62	663	663	663	1	1	1	1	1	1	1	1	1	1	1	1	1	1	1	1	1	1	1	1	1	1	1	1	1	1	1	1	1	1	1	1	1	1	1	1	1	1	1
group_1921	mngR	HTH-type transcriptional repressor STM4068	568	568	1	3	61	723	723	723	1	1	1	1	1	1	1	1	1	1	1	1	1	1	1	1	1	1	1	1	1	1	1	1	1	1	1	1	1	1	1	1	1	1	1	1	1	1	1
argC	argC	N-acetyl-gamma-glutamyl-phosphate reductase	568	568	1	3	60	1005	1005	1005	1	1	1	1	1	1	1	1	1	1	1	1	1	1	1	1	1	1	1	1	1	1	1	1	1	1	1	1	1	1	1	1	1	1	1	1	1	1	1
group_1920		DUF3829 domain-containing protein	568	568	1	3	59	1101	1101	1101	1	1	1	1	1	1	1	1	1	1	1	1	1	1	1	1	1	1	1	1	1	1	1	1	1	1	1	1	1	1	1	1	1	1	1	1	1	1	1
trmA	trmA	tRNA (uridine(54)-C5)-methyltransferase TrmA	568	568	1	3	58	1101	1101	1101	1	1	1	1	1	1	1	1	1	1	1	1	1	1	1	1	1	1	1	1	1	1	1	1	1	1	1	1	1	1	1	1	1	1	1	1	1	1	1
group_1919	mscS	Small-conductance mechanosensitive channel	568	568	1	3	57	858	858	858	1	1	1	1	1	1	1	1	1	1	1	1	1	1	1	1	1	1	1	1	1	1	1	1	1	1	1	1	1	1	1	1	1	1	1	1	1	1	1
yshB	yshB	Uncharacterized protein YshB;YshB family small membrane protein	568	568	1	3	56	111	144	111.058	1	1	1	1	1	1	1	1	1	1	1	1	1	1	1	1	1	1	1	1	1	1	1	1	1	1	1	1	1	1	1	1	1	1	1	1	1	1	1
group_1918	glpX	class II fructose-bisphosphatase	568	568	1	3	55	1011	1011	1011	1	1	1	1	1	1	1	1	1	1	1	1	1	1	1	1	1	1	1	1	1	1	1	1	1	1	1	1	1	1	1	1	1	1	1	1	1	1	1
group_1917	aes	Acetyl esterase/lipase	568	568	1	3	54	930	930	930	1	1	1	1	1	1	1	1	1	1	1	1	1	1	1	1	1	1	1	1	1	1	1	1	1	1	1	1	1	1	1	1	1	1	1	1	1	1	1
fdhE	fdhE	formate dehydrogenase accessory protein FdhE	568	568	1	3	53	930	930	930	1	1	1	1	1	1	1	1	1	1	1	1	1	1	1	1	1	1	1	1	1	1	1	1	1	1	1	1	1	1	1	1	1	1	1	1	1	1	1
menA	menA	14-dihydroxy-2-naphthoate polyprenyltransferase	568	568	1	3	52	930	930	930	1	1	1	1	1	1	1	1	1	1	1	1	1	1	1	1	1	1	1	1	1	1	1	1	1	1	1	1	1	1	1	1	1	1	1	1	1	1	1
group_1916	gldA	Glycerol dehydrogenase;hypothetical protein	568	569	1.00176	3	51	264	1104	1101.53	1	1	1	1	1	1	1	1	1	1	1	1	1	1	1	1	1	1	1	1	1	1	1	1	1	1	1	1	1	1	1	1	1	1	1	1	1	1	1
katG	katG	Catalase-peroxidase;Catalase;catalase/peroxidase HPI	568	569	1.00176	3	50	141	2181	2177.18	1	1	1	1	1	1	1	1	1	1	1	1	1	1	1	1	1	1	1	1	1	1	1	1	1	1	1	1	1	1	1	1	1	1	1	1	1	1	1
sodA	sodA	superoxide dismutase [Mn]	568	568	1	3	49	621	621	621	1	1	1	1	1	1	1	1	1	1	1	1	1	1	1	1	1	1	1	1	1	1	1	1	1	1	1	1	1	1	1	1	1	1	1	1	1	1	1
yihD	yihD	Protein YihD	568	568	1	3	48	216	270	269.905	1	1	1	1	1	1	1	1	1	1	1	1	1	1	1	1	1	1	1	1	1	1	1	1	1	1	1	1	1	1	1	1	1	1	1	1	1	1	1
yiiQ	yiiQ	Uncharacterized protein YiiQ;YiiQ family protein	568	568	1	3	47	498	597	596.826	1	1	1	1	1	1	1	1	1	1	1	1	1	1	1	1	1	1	1	1	1	1	1	1	1	1	1	1	1	1	1	1	1	1	1	1	1	1	1
hemN	hemN	oxygen-independent coproporphyrinogen III oxidase	568	568	1	3	46	1374	1374	1374	1	1	1	1	1	1	1	1	1	1	1	1	1	1	1	1	1	1	1	1	1	1	1	1	1	1	1	1	1	1	1	1	1	1	1	1	1	1	1
group_1915	fucO	hypothetical protein;putative alcohol dehydrogenase;lactaldehyde reductase	568	569	1.00176	3	45	123	1149	1146.89	1	1	1	1	1	1	1	1	1	1	1	1	1	1	1	1	1	1	1	1	1	1	1	1	1	1	1	1	1	1	1	1	1	1	1	1	1	1	1
cpxA	cpxA	envelope stress sensor histidine kinase CpxA	568	568	1	3	44	1374	1374	1374	1	1	1	1	1	1	1	1	1	1	1	1	1	1	1	1	1	1	1	1	1	1	1	1	1	1	1	1	1	1	1	1	1	1	1	1	1	1	1
rhaA	rhaA	L-rhamnose isomerase	568	568	1	3	43	1152	1260	1259.81	1	1	1	1	1	1	1	1	1	1	1	1	1	1	1	1	1	1	1	1	1	1	1	1	1	1	1	1	1	1	1	1	1	1	1	1	1	1	1
group_1914		Cytoplasmic protein	568	568	1	3	42	198	198	198	1	1	1	1	1	1	1	1	1	1	1	1	1	1	1	1	1	1	1	1	1	1	1	1	1	1	1	1	1	1	1	1	1	1	1	1	1	1	1
group_1913	rbsK	ribokinase;Sugar or nucleoside kinase ribokinase family	568	568	1	3	41	897	918	897.037	1	1	1	1	1	1	1	1	1	1	1	1	1	1	1	1	1	1	1	1	1	1	1	1	1	1	1	1	1	1	1	1	1	1	1	1	1	1	1
argH	argH	argininosuccinate lyase	568	568	1	3	40	1377	1377	1377	1	1	1	1	1	1	1	1	1	1	1	1	1	1	1	1	1	1	1	1	1	1	1	1	1	1	1	1	1	1	1	1	1	1	1	1	1	1	1
dsbA	dsbA	thiol:disulfide interchange protein DsbA	568	568	1	3	39	624	624	624	1	1	1	1	1	1	1	1	1	1	1	1	1	1	1	1	1	1	1	1	1	1	1	1	1	1	1	1	1	1	1	1	1	1	1	1	1	1	1
yiijF	yiijF	DUF1287 domain-containing protein	568	568	1	3	38	624	624	624	1	1	1	1	1	1	1	1	1	1	1	1	1	1	1	1	1	1	1	1	1	1	1	1	1	1	1	1	1	1	1	1	1	1	1	1	1	1	1
group_1912		MFS transporter	568	568	1	3	37	1383	1383	1383	1	1	1	1	1	1	1	1	1	1	1	1	1	1	1	1	1	1	1	1	1	1	1	1	1	1	1	1	1	1	1	1	1	1	1	1	1	1	1
glpK	glpK	glycerol kinase GlpK	568	568	1	3	36	1446	1509	1508.89	1	1	1	1	1	1	1	1	1	1	1	1	1	1	1	1	1	1	1	1	1	1	1	1	1	1	1	1	1	1	1	1	1	1	1	1	1	1	1
group_1911	ptsP	PTS sugar transporter subunit IIA;multifunctional phosphoenolpyruvate-protein phosphotransferase/phosphocarrier protein HPr/PTS system fructose-like transporter subunit IIA;HPr or related phosphotransfer protein	568	571	1.00528	3	35	372	2502	2488.62	1	1	1	1	1	1	1	1	1	1	1	1	1	1	1	1	1	1	1	1	1	1	1	1	1	1	1	1	1	1	1	1	1	1	1	1	1	1	1
group_1910		Cupin domain-containing protein	568	568	1	3	34	351	351	351	1	1	1	1	1	1	1	1	1	1	1	1	1	1	1	1	1	1	1	1	1	1	1	1	1	1	1	1	1	1	1	1	1	1	1	1	1	1	1
cytR	cytR	DNA-binding transcriptional regulator CytR	568	568	1	3	33	1026	1026	1026	1	1	1	1	1	1	1	1	1	1	1	1	1	1	1	1	1	1	1	1	1	1	1	1	1	1	1	1	1	1	1	1	1	1	1	1	1	1	1
dtd	dtd	D-aminoacyl-tRNA deacylase	568	568	1	3	32	438	438	438	1	1	1	1	1	1	1	1	1	1	1	1	1	1	1	1	1	1	1	1	1	1	1	1	1	1	1	1	1	1	1	1	1	1	1	1	1	1	1
lsrK	lsrK	autoinducer-2 kinase	568	568	1	3	31	1593	1593	1593	1	1	1	1	1	1	1	1	1	1	1	1	1	1	1	1	1	1	1	1	1	1	1	1	1	1	1	1	1	1	1	1	1	1	1	1	1	1	1
lsrD	lsrD	ABC transporter membrane protein;ABC transporter permease;autoinducer 2 ABC transporter permease LsrD	568	570	1.00352	3	30	453	999	995.621	1	1	1	1	1	1	1	1	1	1	1	1	1	1	1	1	1	1	1	1	1	1	1	1	1	1	1	1	1	1	1	1	1	1	1	1	1	1	1
group_1909	dctQ	Tripartite ATP-independent periplasmic transporter DctM component;TRAP-type C4-dicarboxylate transport system large permease component	568	568	1	3	29	1149	1308	1307.72	1	1	1	1	1	1	1	1	1	1	1	1	1	1	1	1	1	1	1	1	1	1	1	1	1	1	1	1	1	1	1	1	1	1	1	1	1	1	1
group_1908	yicI	alpha-glucosidase	568	568	1	3	28	2037	2037	2037	1	1	1	1	1	1	1	1	1	1	1	1	1	1	1	1	1	1	1	1	1	1	1	1	1	1	1	1	1	1	1	1	1	1	1	1	1	1	1
group_1907		SnoaL-like domain-containing protein	568	568	1	3	27	396	396	396	1	1	1	1	1	1	1	1	1	1	1	1	1	1	1	1	1	1	1	1	1	1	1	1	1	1	1	1	1	1	1	1	1	1	1	1	1	1	1
higB	higB	mRNA-degrading endonuclease (mRNA interferase) HigB toxic component of the HigAB toxin-antitoxin module	568	568	1	3	26	312	312	312	1	1	1	1	1	1	1	1	1	1	1	1	1	1	1	1	1	1	1	1	1	1	1	1	1	1	1	1	1	1	1	1	1	1	1	1	1	1	1
zapB	zapB	septal ring assembly protein ZapB	568	568	1	3	25	240	240	240	1	1	1	1	1	1	1	1	1	1	1	1	1	1	1	1	1	1	1	1	1	1	1	1	1	1	1	1	1	1	1	1	1	1	1	1	1	1	1
lsrA	lsrA	autoinducer 2 ABC transporter ATP-binding protein LsrA	568	568	1	3	24	1476	1551	1536.24	1	1	1	1	1	1	1	1	1	1	1	1	1	1	1	1	1	1	1	1	1	1	1	1	1	1	1	1	1	1	1	1	1	1	1	1	1	1	1
lsrF	lsrF	3-hydroxy-5-phosphonooxypentane-24-dione thiolase	568	568	1	3	23	876	876	876	1	1	1	1	1	1	1	1	1	1	1	1	1	1	1	1	1	1	1	1	1	1	1	1	1	1	1	1	1	1	1	1	1	1	1	1	1	1	1
lsrB	lsrB	autoinducer 2 ABC transporter substrate-binding protein LsrB	568	568	1	3	22	1032	1032	1032	1	1	1	1	1	1	1	1	1	1	1	1	1	1	1	1	1	1	1	1	1	1	1	1	1	1	1	1	1	1	1	1	1	1	1	1	1	1	1
group_1906		Putative cytoplasmic protein;Cytoplasmic protein	568	568	1	3	21	627	1125	1124.12	1	1	1	1	1	1	1	1	1	1	1	1	1	1	1	1	1	1	1	1	1	1	1	1	1	1	1	1	1	1	1	1	1	1	1	1	1	1	1
group_1905	frwB	PTS fructose-like transporter subunit IIB	568	568	1	3	20	354	354	354	1	1	1	1	1	1	1	1	1	1	1	1	1	1	1	1	1	1	1	1	1	1	1	1	1	1	1	1	1	1	1	1	1	1	1	1	1	1	1
group_1904		DUF3829 domain-containing protein	568	568	1	3	19	1032	1032	1032	1	1	1	1	1	1	1	1	1	1	1	1	1	1	1	1	1	1	1	1	1	1	1	1	1	1	1	1	1	1	1	1	1	1	1	1	1	1	1
group_1903	glpR	DNA-binding transcriptional regulator of sugar metabolism DeoR/GlpR family	568	568	1	3	18	804	804	804	1	1	1	1	1	1	1	1	1	1	1	1	1	1	1	1	1	1	1	1	1	1	1	1	1	1	1	1	1	1	1	1	1	1	1	1	1	1	1
sthA	sthA	Si-specific NAD(P)(+) transhydrogenase	568	568	1	3	17	1401	1401	1401	1	1	1	1	1	1	1	1	1	1	1	1	1	1	1	1	1	1	1	1	1	1	1	1	1	1	1	1	1	1	1	1	1	1	1	1	1	1	1
group_1902		Membrane permease;MFS transporter;Glucuronide transport protein YihO	568	569	1.00176	3	16	531	1419	1413.18	1	1	1	1	1	1	1	1	1	1	1	1	1	1	1	1	1	1	1	1	1	1	1	1	1	1	1	1	1	1	1	1	1	1	1	1	1	1	1
yihT	yihT	sulfofructosephosphate aldolase	568	568	1	3	15	879	879	879	1	1	1	1	1	1	1	1	1	1	1	1	1	1	1	1	1	1	1	1	1	1	1	1	1	1	1	1	1	1	1	1	1	1	1	1	1	1	1
group_1901	mafI	MafI family immunity protein	568	568	1	3	14	204	204	204	1	1	1	1	1	1	1	1	1	1	1	1	1	1	1	1	1	1	1	1	1	1	1	1	1	1	1	1	1	1	1	1	1	1	1	1	1	1	1
rhaM	rhaM	L-rhamnose mutarotase	568	568	1	3	13	315	315	315	1	1	1	1	1	1	1	1	1	1	1	1	1	1	1	1	1	1	1	1	1	1	1	1	1	1	1	1	1	1	1	1	1	1	1	1	1	1	1
group_1900	pflA	[formate-C-acetyltransferase]-activating enzyme	568	568	1	3	12	879	879	879	1	1	1	1	1	1	1	1	1	1	1	1	1	1	1	1	1	1	1	1	1	1	1	1	1	1	1	1	1	1	1	1	1	1	1	1	1	1	1
pflD	pflD	Formate acetyltransferase 2;formate C-acetyltransferase	568	570	1.00352	3	11	513	2298	2289.93	1	1	1	1	1	1	1	1	1	1	1	1	1	1	1	1	1	1	1	1	1	1	1	1	1	1	1	1	1	1	1	1	1	1	1	1	1	1	1
group_1899	cpxP	Repressor CpxP;cell-envelope stress modulator CpxP;Periplasmic protein CpxP	568	570	1.00352	3	10	165	501	498.505	1	1	1	1	1	1	1	1	1	1	1	1	1	1	1	1	1	1	1	1	1	1	1	1	1	1	1	1	1	1	1	1	1	1	1	1	1	1	1
yihI	yihI	Der GTPase-activating protein YihI	568	568	1	3	9	516	528	516.021	1	1	1	1	1	1	1	1	1	1	1	1	1	1	1	1	1	1	1	1	1	1	1	1	1	1	1	1	1	1	1	1	1	1	1	1	1	1	1
glnG	glnG	Nitrogen regulation protein NR(I);nitrogen regulation protein NR(I)	568	568	1	3	8	303	1410	1408.05	1	1	1	1	1	1	1	1	1	1	1	1	1	1	1	1	1	1	1	1	1	1	1	1	1	1	1	1	1	1	1	1	1	1	1	1	1	1	1
mobB	mobB	molybdopterin-guanine dinucleotide biosynthesis protein MobB	568	568	1	3	7	531	531	531	1	1	1	1	1	1	1	1	1	1	1	1	1	1	1	1	1	1	1	1	1	1	1	1	1	1	1	1	1	1	1	1	1	1	1	1	1	1	1
hslV	hslV	ATP-dependent protease subunit HslV	568	568	1	3	6	531	531	531	1	1	1	1	1	1	1	1	1	1	1	1	1	1	1	1	1	1	1	1	1	1	1	1	1	1	1	1	1	1	1	1	1	1	1	1	1	1	1
group_1898		RHH-1 domain-containing protein	568	568	1	3	5	243	243	243	1	1	1	1	1	1	1	1	1	1	1	1	1	1	1	1	1	1	1	1	1	1	1	1	1	1	1	1	1	1	1	1	1	1	1	1	1	1	1
rraA	rraA	ribonuclease E activity regulator RraA	568	568	1	3	4	486	486	486	1	1	1	1	1	1	1	1	1	1	1	1	1	1	1	1	1	1	1	1	1	1	1	1	1	1	1	1	1	1	1	1	1	1	1	1	1	1	1
group_1897	draG	ADP-ribosylglycohydrolase	568	568	1	3	3	1041	1041	1041	1	1	1	1	1	1	1	1	1	1	1	1	1	1	1	1	1	1	1	1	1	1	1	1	1	1	1	1	1	1	1	1	1	1	1	1	1	1	1
yihA	yihA	ribosome biogenesis GTP-binding protein YihA/YsxC	568	568	1	3	2	633	633	633	1	1	1	1	1	1	1	1	1	1	1	1	1	1	1	1	1	1	1	1	1	1	1	1	1	1	1	1	1	1	1	1	1	1	1	1	1	1	1
glnA	glnA	glutamate--ammonia ligase	568	568	1	3	1	1410	1410	1410	1	1	1	1	1	1	1	1	1	1	1	1	1	1	1	1	1	1	1	1	1	1	1	1	1	1	1	1	1	1	1	1	1	1	1	1	1	1	1
thiG	thiG	2-iminoacetate synthase;thiazole synthase	568	568	1	2	33	696	1890	772.838	1	1	1	1	1	1	1	1	1	1	1	1	1	1	1	1	1	1	1	1	1	1	1	1	1	1	1	1	1	1	1	1	1	1	1	1	1	1	1
hemE	hemE	uroporphyrinogen decarboxylase	568	568	1	2	32	1065	1065	1065	1	1	1	1	1	1	1	1	1	1	1	1	1	1	1	1	1	1	1	1	1	1	1	1	1	1	1	1	1	1	1	1	1	1	1	1	1	1	1
nusG	nusG	transcription termination/antitermination protein NusG	568	568	1	2	30	546	546	546	1	1	1	1	1	1	1	1	1	1	1	1	1	1	1	1	1	1	1	1	1	1	1	1	1	1	1	1	1	1	1	1	1	1	1	1	1	1	1
rplA	rplA	50S ribosomal protein L1	568	568	1	2	29	705	705	705	1	1	1	1	1	1	1	1	1	1	1	1	1	1	1	1	1	1	1	1	1	1	1	1	1	1	1	1	1	1	1	1	1	1	1	1	1	1	1
rsd	rsd	sigma D regulator	568	568	1	2	27	489	489	489	1	1	1	1	1	1	1	1	1	1	1	1	1	1	1	1	1	1	1	1	1	1	1	1	1	1	1	1	1	1	1	1	1	1	1	1	1	1	1
thiE	thiE	thiamine phosphate synthase	568	568	1	2	26	636	636	636	1	1	1	1	1	1	1	1	1	1	1	1	1	1	1	1	1	1	1	1	1	1	1	1	1	1	1	1	1	1	1	1	1	1	1	1	1	1	1
rplL	rplL	50S ribosomal protein L7/L12	568	568	1	2	24	348	372	371.958	1	1	1	1	1	1	1	1	1	1	1	1	1	1	1	1	1	1	1	1	1	1	1	1	1	1	1	1	1	1	1	1	1	1	1	1	1	1	1
rpoB	rpoB	DNA-directed RNA polymerase subunit beta	568	568	1	2	22	4029	4029	4029	1	1	1	1	1	1	1	1	1	1	1	1	1	1	1	1	1	1	1	1	1	1	1	1	1	1	1	1	1	1	1	1	1	1	1	1	1	1	1
purH	purH	bifunctional phosphoribosylaminoimidazolecarboxamide formyltransferase/IMP cyclohydrolase	568	568	1	2	21	1590	1590	1590	1	1	1	1	1	1	1	1	1	1	1	1	1	1	1	1	1	1	1	1	1	1	1	1	1	1	1	1	1	1	1	1	1	1	1	1	1	1	1
secE	secE	preprotein translocase subunit SecE	568	568	1	2	19	384	384	384	1	1	1	1	1	1	1	1	1	1	1	1	1	1	1	1	1	1	1	1	1	1	1	1	1	1	1	1	1	1	1	1	1	1	1	1	1	1	1
birA	birA	bifunctional biotin--[acetyl-CoA-carboxylase] ligase/biotin operon repressor BirA	568	568	1	2	18	963	963	963	1	1	1	1	1	1	1	1	1	1	1	1	1	1	1	1	1	1	1	1	1	1	1	1	1	1	1	1	1	1	1	1	1	1	1	1	1	1	1
nudC	nudC	NAD(+) diphosphatase	568	569	1.00176	2	17	249	774	772.149	1	1	1	1	1	1	1	1	1	1	1	1	1	1	1	1	1	1	1	1	1	1	1	1	1	1	1	1	1	1	1	1	1	1	1	1	1	1	1
thiC	thiC	phosphomethylpyrimidine synthase ThiC	568	568	1	2	15	1896	1896	1896	1	1	1	1	1	1	1	1	1	1	1	1	1	1	1	1	1	1	1	1	1	1	1	1	1	1	1	1	1	1	1	1	1	1	1	1	1	1	1
group_1893		UDP-N-acetylenolpyruvoylglucosamine reductase	568	568	1	2	14	1029	1029	1029	1	1	1	1	1	1	1	1	1	1	1	1	1	1	1	1	1	1	1	1	1	1	1	1	1	1	1	1	1	1	1	1	1	1	1	1	1	1	1
nfi	nfi	hypothetical protein;deoxyribonuclease V	568	568	1	2	13	618	675	674.9	1	1	1	1	1	1	1	1	1	1	1	1	1	1	1	1	1	1	1	1	1	1	1	1	1	1	1	1	1	1	1	1	1	1	1	1	1	1	1
thiS	thiS	hypothetical protein;sulfur carrier protein ThiS	568	568	1	2	12	174	279	174.185	1	1	1	1	1	1	1	1	1	1	1	1	1	1	1	1	1	1	1	1	1	1	1	1	1	1	1	1	1	1	1	1	1	1	1	1	1	1	1
rplK	rplK	50S ribosomal protein L11	568	568	1	2	11	429	429	429	1	1	1	1	1	1	1	1	1	1	1	1	1	1	1	1	1	1	1	1	1	1	1	1	1	1	1	1	1	1	1	1	1	1	1	1	1	1	1
zraS	zraS	two-component system sensor histidine kinase ZraS	568	568	1	2	10	1398	1398	1398	1	1	1	1	1	1	1	1	1	1	1	1	1	1	1	1	1	1	1	1	1	1	1	1	1	1	1	1	1	1	1	1	1	1	1	1	1	1	1
coaA	coaA	type I pantothenate kinase	568	568	1	2	9	927	927	927	1	1	1	1	1	1	1	1	1	1	1	1	1	1	1	1	1	1	1	1	1	1	1	1	1	1	1	1	1	1	1	1	1	1	1	1	1	1	1
purD	purD	Phosphoribosylamine--glycine ligase	568	568	1	2	8	1290	1290	1290	1	1	1	1	1	1	1	1	1	1	1	1	1	1	1	1	1	1	1	1	1	1	1	1	1	1	1	1	1	1	1	1	1	1	1	1	1	1	1
rpoC	rpoC	hypothetical protein;DNA-directed RNA polymerase subunit beta'	568	572	1.00704	2	5	495	4224	4190.44	1	1	1	1	1	1	1	1	1	1	1	1	1	1	1	1	1	1	1	1	1	1	1	1	1	1	1	1	1	1	1	1	1	1	1	1	1	1	1
zraR	zraR	hypothetical protein;Two-component system response regulator;sigma-54-dependent response regulator transcription factor ZraR	568	569	1.00176	2	4	582	1350	1347.31	1	1	1	1	1	1	1	1	1	1	1	1	1	1	1	1	1	1	1	1	1	1	1	1	1	1	1	1	1	1	1	1	1	1	1	1	1	1	1
thiF	thiF	Molybdopterin or thiamine biosynthesis adenylyltransferase	568	568	1	2	3	759	759	759	1	1	1	1	1	1	1	1	1	1	1	1	1	1	1	1	1	1	1	1	1	1	1	1	1	1	1	1	1	1	1	1	1	1	1	1	1	1	1
rplJ	rplJ	50S ribosomal protein L10	568	568	1	2	1	498	498	498	1	1	1	1	1	1	1	1	1	1	1	1	1	1	1	1	1	1	1	1	1	1	1	1	1	1	1	1	1	1	1	1	1	1	1	1	1	1	1
rbsC~~~rbsB	rbsC;rbsB	ribose ABC transporter permease;Peripla-BP-4 domain-containing protein;ribose ABC transporter substrate-binding protein RbsB;D-ribose-binding periplasmic protein	568	570	1.00352	1	4895	300	1101	888.079	1	1	1	1	1	1	1	1	1	1	1	1	1	1	1	1	1	1	1	1	1	1	1	1	1	1	1	1	1	1	1	1	1	1	1	1	1	1	1
csgB	csgB	hypothetical protein;minor curlin subunit precursor curli nucleator protein CsgB	568	568	1	1	4892	321	456	455.762	1	1	1	1	1	1	1	1	1	1	1	1	1	1	1	1	1	1	1	1	1	1	1	1	1	1	1	1	1	1	1	1	1	1	1	1	1	1	1
oppA~~~mppA	oppA;mppA	hypothetical protein;Periplasmic murein tripeptide transport protein also negative regulator of mulitple antibiotic resistance;Periplasmic murein peptide-binding protein;ABC-type oligopeptide transport system periplasmic component	568	573	1.0088	1	4880	318	1614	1594.21	1	1	1	1	1	1	1	1	1	1	1	1	1	1	1	1	1	1	1	1	1	1	1	1	1	1	1	1	1	1	1	1	1	1	1	1	1	1	1
miaA	miaA	tRNA (adenosine(37)-N6)-dimethylallyltransferase MiaA;tRNA dimethylallyltransferase	568	569	1.00176	1	4874	474	1116	948.221	1	1	1	1	1	1	1	1	1	1	1	1	1	1	1	1	1	1	1	1	1	1	1	1	1	1	1	1	1	1	1	1	1	1	1	1	1	1	1
sopF	sopF	hypothetical protein;Bacteriophage protein;type III secretion system effector SopF	568	1076	1.89437	1	4867	102	1125	569.98	1	1	1	1	1	1	1	1	1	1	1	1	1	1	1	1	1	1	1	1	1	1	1	1	1	1	1	1	1	1	1	1	1	1	1	1	1	1	1
rnb	rnb	Exoribonuclease 2;exoribonuclease II;Exoribonuclease II;S1 RNA-binding domain-containing protein	568	575	1.01232	1	4866	210	1935	1909.22	1	1	1	1	1	1	1	1	1	1	1	1	1	1	1	1	1	1	1	1	1	1	1	1	1	1	1	1	1	1	1	1	1	1	1	1	1	1	1
group_1794	wcaE	glycosyl transferase;Glycosyltransferase GT2 family	568	568	1	1	4865	837	897	893.904	1	1	1	1	1	1	1	1	1	1	1	1	1	1	1	1	1	1	1	1	1	1	1	1	1	1	1	1	1	1	1	1	1	1	1	1	1	1	1
group_1793	putP	Sodium/proline symporter (Proline permease);Sodium/proline symporter;sodium/proline symporter PutP	568	572	1.00704	1	4864	237	1509	1498.64	1	1	1	1	1	1	1	1	1	1	1	1	1	1	1	1	1	1	1	1	1	1	1	1	1	1	1	1	1	1	1	1	1	1	1	1	1	1	1
putA~~~putA2	putA;putA2	Trifunctional transcriptional regulator/proline dehydrogenase/pyrroline-5-carboxylate dehydrogenase;trifunctional transcriptional regulator/proline dehydrogenase/L-glutamate gamma-semialdehyde dehydrogenase;Delta 1-pyrroline-5-carboxylate dehydrogenase	568	570	1.00352	1	4863	387	3966	3952.12	1	1	1	1	1	1	1	1	1	1	1	1	1	1	1	1	1	1	1	1	1	1	1	1	1	1	1	1	1	1	1	1	1	1	1	1	1	1	1
mprA	mprA	hypothetical protein;transcriptional repressor MprA	568	569	1.00176	1	4862	153	531	530.093	1	1	1	1	1	1	1	1	1	1	1	1	1	1	1	1	1	1	1	1	1	1	1	1	1	1	1	1	1	1	1	1	1	1	1	1	1	1	1
dsbE	dsbE	hypothetical protein;Thiol:disulfide interchange protein DsbE;thiol:disulfide interchange protein DsbE	568	569	1.00176	1	4861	261	558	557.404	1	1	1	1	1	1	1	1	1	1	1	1	1	1	1	1	1	1	1	1	1	1	1	1	1	1	1	1	1	1	1	1	1	1	1	1	1	1	1
cbiB	cbiB	hypothetical protein;adenosylcobinamide-phosphate synthase CbiB;Cobalamin biosynthesis protein CobD	568	572	1.00704	1	4859	93	960	952.899	1	1	1	1	1	1	1	1	1	1	1	1	1	1	1	1	1	1	1	1	1	1	1	1	1	1	1	1	1	1	1	1	1	1	1	1	1	1	1
metR	metR	HTH-type transcriptional regulator MetR	568	568	1	1	4858	921	969	953.968	1	1	1	1	1	1	1	1	1	1	1	1	1	1	1	1	1	1	1	1	1	1	1	1	1	1	1	1	1	1	1	1	1	1	1	1	1	1	1
csgE	csgE	hypothetical protein;Curli production assembly/transport component CsgE;curli production assembly/transport protein CsgE	568	569	1.00176	1	4857	93	396	395.304	1	1	1	1	1	1	1	1	1	1	1	1	1	1	1	1	1	1	1	1	1	1	1	1	1	1	1	1	1	1	1	1	1	1	1	1	1	1	1
pdeR	pdeR	RNase II stability modulator;cyclic di-GMP phosphodiesterase;PAS domain S-box protein	568	579	1.01937	1	4852	483	2064	1953.89	1	1	1	1	1	1	1	1	1	1	1	1	1	1	1	1	1	1	1	1	1	1	1	1	1	1	1	1	1	1	1	1	1	1	1	1	1	1	1
tdcD	tdcD	hypothetical protein;propionate kinase	568	568	1	1	4848	138	1209	1206.92	1	1	1	1	1	1	1	1	1	1	1	1	1	1	1	1	1	1	1	1	1	1	1	1	1	1	1	1	1	1	1	1	1	1	1	1	1	1	1
glgA	glgA	Glycogen synthase;glycogen synthase GlgA;glycogen/starch synthase	568	572	1.00704	1	4847	345	1458	1447.43	1	1	1	1	1	1	1	1	1	1	1	1	1	1	1	1	1	1	1	1	1	1	1	1	1	1	1	1	1	1	1	1	1	1	1	1	1	1	1
stpA	stpA	DNA-binding protein;H-NS histone family protein;DNA-binding protein StpA	568	569	1.00176	1	4840	117	402	401.262	1	1	1	1	1	1	1	1	1	1	1	1	1	1	1	1	1	1	1	1	1	1	1	1	1	1	1	1	1	1	1	1	1	1	1	1	1	1	1
dcuC	dcuC	anaerobic C4-dicarboxylate transporter DcuC	568	568	1	1	4838	1311	1386	1385.87	1	1	1	1	1	1	1	1	1	1	1	1	1	1	1	1	1	1	1	1	1	1	1	1	1	1	1	1	1	1	1	1	1	1	1	1	1	1	1
ydgT	ydgT	hypothetical protein;transcription modulator YdgT	568	568	1	1	4837	216	261	216.079	1	1	1	1	1	1	1	1	1	1	1	1	1	1	1	1	1	1	1	1	1	1	1	1	1	1	1	1	1	1	1	1	1	1	1	1	1	1	1
group_1785	dsbC	hypothetical protein;Protein thiol-disulfide isomerase DsbC	568	568	1	1	4836	564	1119	624.766	1	1	1	1	1	1	1	1	1	1	1	1	1	1	1	1	1	1	1	1	1	1	1	1	1	1	1	1	1	1	1	1	1	1	1	1	1	1	1
group_1780		hypothetical protein;DUF3300 domain-containing protein	568	568	1	1	4831	1314	1623	1620.82	1	1	1	1	1	1	1	1	1	1	1	1	1	1	1	1	1	1	1	1	1	1	1	1	1	1	1	1	1	1	1	1	1	1	1	1	1	1	1
yifE	yifE	UPF0438 protein;macrodomain Ori organization protein MaoP	568	568	1	1	4830	321	339	338.968	1	1	1	1	1	1	1	1	1	1	1	1	1	1	1	1	1	1	1	1	1	1	1	1	1	1	1	1	1	1	1	1	1	1	1	1	1	1	1
group_1778		STMD1-49 protein;Inner membrane protein	568	568	1	1	4828	330	354	353.947	1	1	1	1	1	1	1	1	1	1	1	1	1	1	1	1	1	1	1	1	1	1	1	1	1	1	1	1	1	1	1	1	1	1	1	1	1	1	1
yaeH	yaeH	DUF3461 domain-containing protein	568	568	1	1	4825	375	387	386.979	1	1	1	1	1	1	1	1	1	1	1	1	1	1	1	1	1	1	1	1	1	1	1	1	1	1	1	1	1	1	1	1	1	1	1	1	1	1	1
group_1776	rimI	hypothetical protein;Ribosomal protein S18 acetylase RimI and related acetyltransferases	568	568	1	1	4824	420	972	420.972	1	1	1	1	1	1	1	1	1	1	1	1	1	1	1	1	1	1	1	1	1	1	1	1	1	1	1	1	1	1	1	1	1	1	1	1	1	1	1
yhbQ	yhbQ	UPF0213 protein YhbQ	568	568	1	1	4821	213	318	317.445	1	1	1	1	1	1	1	1	1	1	1	1	1	1	1	1	1	1	1	1	1	1	1	1	1	1	1	1	1	1	1	1	1	1	1	1	1	1	1
msrC	msrC	GAF domain-containing protein;Free methionine-R-sulfoxide reductase;GAF domain-containing protein putative methionine-R-sulfoxide reductase	568	568	1	1	4820	441	570	569.646	1	1	1	1	1	1	1	1	1	1	1	1	1	1	1	1	1	1	1	1	1	1	1	1	1	1	1	1	1	1	1	1	1	1	1	1	1	1	1
group_1772	minD	Putative polyferredoxin;Polyferredoxin;ferredoxin;MinD superfamily P-loop ATPase contains an inserted ferredoxin domain	568	568	1	1	4817	579	864	862.775	1	1	1	1	1	1	1	1	1	1	1	1	1	1	1	1	1	1	1	1	1	1	1	1	1	1	1	1	1	1	1	1	1	1	1	1	1	1	1
ung	ung	uracil-DNA glycosylase	568	568	1	1	4814	675	690	689.974	1	1	1	1	1	1	1	1	1	1	1	1	1	1	1	1	1	1	1	1	1	1	1	1	1	1	1	1	1	1	1	1	1	1	1	1	1	1	1
ccmC	ccmC	hypothetical protein;Heme exporter protein C;Cytochrome c-type biogenesis protein CcmC;heme ABC transporter permease;ABC-type transport system involved in cytochrome c biogenesis permease component	568	569	1.00176	1	4811	279	846	747.411	1	1	1	1	1	1	1	1	1	1	1	1	1	1	1	1	1	1	1	1	1	1	1	1	1	1	1	1	1	1	1	1	1	1	1	1	1	1	1
miaE	miaE	tRNA-(Ms[2]io[6]A)-hydroxylase;tRNA isopentenyl-2-thiomethyl-A-37 hydroxylase MiaE	568	599	1.05458	1	4810	345	765	726.806	1	1	1	1	1	1	1	1	1	1	1	1	1	1	1	1	1	1	1	1	1	1	1	1	1	1	1	1	1	1	1	1	1	1	1	1	1	1	1
group_1768	dmsC	dimethyl sulfoxide reductase anchor subunit;hypothetical protein;dimethyl sulfoxide reductase;Cation:dicarboxylase symporter family transporter;Dimethyl sulfoxide reductase subunit C;DMSO reductase anchor subunit DmsC	568	571	1.00528	1	4808	219	774	769.324	1	1	1	1	1	1	1	1	1	1	1	1	1	1	1	1	1	1	1	1	1	1	1	1	1	1	1	1	1	1	1	1	1	1	1	1	1	1	1
rsmI	rsmI	16S rRNA (cytidine(1402)-2'-O)-methyltransferase	568	569	1.00176	1	4807	414	864	862.371	1	1	1	1	1	1	1	1	1	1	1	1	1	1	1	1	1	1	1	1	1	1	1	1	1	1	1	1	1	1	1	1	1	1	1	1	1	1	1
lldP	lldP	hypothetical protein;L-lactate permease	568	573	1.0088	1	4806	204	1656	1640.73	1	1	1	1	1	1	1	1	1	1	1	1	1	1	1	1	1	1	1	1	1	1	1	1	1	1	1	1	1	1	1	1	1	1	1	1	1	1	1
mltD	mltD	Membrane-bound lytic murein transglycosylase D;Peptidoglycan lytic exotransglycosylase;hypothetical protein;transglycosylase SLT domain-containing protein;murein transglycosylase D;Membrane-bound lytic murein transglycosylase d	568	577	1.01585	1	4803	117	1233	1212.98	1	1	1	1	1	1	1	1	1	1	1	1	1	1	1	1	1	1	1	1	1	1	1	1	1	1	1	1	1	1	1	1	1	1	1	1	1	1	1
steC	steC	hypothetical protein;Putative inner membrane protein;Secreted effector kinase steC;hydrogenase;SPI-2 type III secretion system effector kinase SteC	568	573	1.0088	1	4802	195	1374	1341.03	1	1	1	1	1	1	1	1	1	1	1	1	1	1	1	1	1	1	1	1	1	1	1	1	1	1	1	1	1	1	1	1	1	1	1	1	1	1	1
epmC	epmC	elongation factor P hydroxylase;Elongation factor P hydroxylase;Elongation factor P hydroxylase EpmC (EF-P beta-lysylation pathway)	568	571	1.00528	1	4800	156	549	545.228	1	1	1	1	1	1	1	1	1	1	1	1	1	1	1	1	1	1	1	1	1	1	1	1	1	1	1	1	1	1	1	1	1	1	1	1	1	1	1
ybjS	ybjS	Short chain dehydrogenase;Nucleotide di-P-sugar epimerase or dehydratase;Uncharacterized protein YbjS	568	569	1.00176	1	4798	300	1032	1030.13	1	1	1	1	1	1	1	1	1	1	1	1	1	1	1	1	1	1	1	1	1	1	1	1	1	1	1	1	1	1	1	1	1	1	1	1	1	1	1
proQ	proQ	ProP effector protein;RNA chaperone ProQ;ProP effector	568	571	1.00528	1	4795	102	687	676.03	1	1	1	1	1	1	1	1	1	1	1	1	1	1	1	1	1	1	1	1	1	1	1	1	1	1	1	1	1	1	1	1	1	1	1	1	1	1	1
group_1765	nagC	hypothetical protein;Sugar kinase of the NBD/HSP70 family may contain an N-terminal HTH domain	568	568	1	1	4794	438	882	881.218	1	1	1	1	1	1	1	1	1	1	1	1	1	1	1	1	1	1	1	1	1	1	1	1	1	1	1	1	1	1	1	1	1	1	1	1	1	1	1
sbcC	sbcC	Nuclease SbcCD subunit C;exonuclease subunit SbcC;Exonuclease subunit SbcC	568	570	1.00352	1	4793	360	3123	3110.03	1	1	1	1	1	1	1	1	1	1	1	1	1	1	1	1	1	1	1	1	1	1	1	1	1	1	1	1	1	1	1	1	1	1	1	1	1	1	1
group_1764	yfcC	Arginine/ornithine antiporter ArcD;C4-dicarboxylate ABC transporter;putative membrane transporter YfcC affects glyoxylate shunt	568	569	1.00176	1	4792	255	1404	1401.04	1	1	1	1	1	1	1	1	1	1	1	1	1	1	1	1	1	1	1	1	1	1	1	1	1	1	1	1	1	1	1	1	1	1	1	1	1	1	1
ssaQ	ssaQ	hypothetical protein;YscQ/HrcQ family type III secretion apparatus protein;SPI-2 type III secretion system cytoplasmic ring protein SsaQ	568	570	1.00352	1	4791	321	969	960.216	1	1	1	1	1	1	1	1	1	1	1	1	1	1	1	1	1	1	1	1	1	1	1	1	1	1	1	1	1	1	1	1	1	1	1	1	1	1	1
group_1763	dctP	TRAP-type C4-dicarboxylate transport system periplasmic component	568	568	1	1	4790	927	987	986.894	1	1	1	1	1	1	1	1	1	1	1	1	1	1	1	1	1	1	1	1	1	1	1	1	1	1	1	1	1	1	1	1	1	1	1	1	1	1	1
yegT	yegT	Major facilitator superfamily protein;Putative nucleoside transporter YegT;Nucleoside transporter;MFS domain-containing protein	568	569	1.00176	1	4789	417	1272	1269.66	1	1	1	1	1	1	1	1	1	1	1	1	1	1	1	1	1	1	1	1	1	1	1	1	1	1	1	1	1	1	1	1	1	1	1	1	1	1	1
phoE	phoE	phosphoporin PhoE	568	568	1	1	4788	900	1053	1052.73	1	1	1	1	1	1	1	1	1	1	1	1	1	1	1	1	1	1	1	1	1	1	1	1	1	1	1	1	1	1	1	1	1	1	1	1	1	1	1
trpCF~~~trpF	trpCFtrpF	Indole-3-glycerol-phosphate synthase;N-(5'-phosphoribosyl)anthranilate isomerase;bifunctional indole-3-glycerol-phosphate synthase TrpC/phosphoribosylanthranilate isomerase TrpF	568	576	1.01408	1	4782	501	1359	1336.53	1	1	1	1	1	1	1	1	1	1	1	1	1	1	1	1	1	1	1	1	1	1	1	1	1	1	1	1	1	1	1	1	1	1	1	1	1	1	1
group_1756		DUF3828 domain-containing protein;YbjP/YqhG family protein	568	568	1	1	4779	384	519	518.762	1	1	1	1	1	1	1	1	1	1	1	1	1	1	1	1	1	1	1	1	1	1	1	1	1	1	1	1	1	1	1	1	1	1	1	1	1	1	1
frsA	frsA	esterase FrsA	568	568	1	1	4775	1083	1302	1244.82	1	1	1	1	1	1	1	1	1	1	1	1	1	1	1	1	1	1	1	1	1	1	1	1	1	1	1	1	1	1	1	1	1	1	1	1	1	1	1
gpt	gpt	Xanthine-guanine phosphoribosyltransferase;Xanthine phosphoribosyltransferase;xanthine phosphoribosyltransferase	568	569	1.00176	1	4774	141	459	458.083	1	1	1	1	1	1	1	1	1	1	1	1	1	1	1	1	1	1	1	1	1	1	1	1	1	1	1	1	1	1	1	1	1	1	1	1	1	1	1
group_1752	purR	LacI family transcriptional regulator;Transcriptional regulator;DNA-binding transcriptional regulator LacI/PurR family	568	574	1.01056	1	4771	210	1020	1008.84	1	1	1	1	1	1	1	1	1	1	1	1	1	1	1	1	1	1	1	1	1	1	1	1	1	1	1	1	1	1	1	1	1	1	1	1	1	1	1
gltP	gltP	Glutamate-aspartate carrier protein;glutamate/aspartate:proton symporter GltP	568	569	1.00176	1	4770	168	1311	1308.71	1	1	1	1	1	1	1	1	1	1	1	1	1	1	1	1	1	1	1	1	1	1	1	1	1	1	1	1	1	1	1	1	1	1	1	1	1	1	1
kduD	kduD	SDR family NAD(P)-dependent oxidoreductase;2-dehydro-3-deoxy-D-gluconate 5-dehydrogenase KduD;2-deoxy-D-gluconate 3-dehydrogenase	568	569	1.00176	1	4766	327	762	760.582	1	1	1	1	1	1	1	1	1	1	1	1	1	1	1	1	1	1	1	1	1	1	1	1	1	1	1	1	1	1	1	1	1	1	1	1	1	1	1
iap	iap	Alkaline phosphatase isozyme conversion protein;aminopeptidase	568	569	1.00176	1	4765	366	1047	1045.23	1	1	1	1	1	1	1	1	1	1	1	1	1	1	1	1	1	1	1	1	1	1	1	1	1	1	1	1	1	1	1	1	1	1	1	1	1	1	1
cysI	cysI	assimilatory sulfite reductase (NADPH) hemoprotein subunit	568	568	1	1	4762	1713	1800	1713.15	1	1	1	1	1	1	1	1	1	1	1	1	1	1	1	1	1	1	1	1	1	1	1	1	1	1	1	1	1	1	1	1	1	1	1	1	1	1	1
leuO	leuO	Leucine transcriptional activator;transcriptional regulator LeuO	568	579	1.01937	1	4761	249	945	926.363	1	1	1	1	1	1	1	1	1	1	1	1	1	1	1	1	1	1	1	1	1	1	1	1	1	1	1	1	1	1	1	1	1	1	1	1	1	1	1
nlpI	nlpI	lipoprotein NlpI	568	569	1.00176	1	4758	240	1062	883.608	1	1	1	1	1	1	1	1	1	1	1	1	1	1	1	1	1	1	1	1	1	1	1	1	1	1	1	1	1	1	1	1	1	1	1	1	1	1	1
group_1746	dinG	ATP-dependent helicase DinG/Rad3;ATP-dependent DNA helicase DinG	568	570	1.00352	1	4756	423	2145	2136.7	1	1	1	1	1	1	1	1	1	1	1	1	1	1	1	1	1	1	1	1	1	1	1	1	1	1	1	1	1	1	1	1	1	1	1	1	1	1	1
feoB	feoB	Fe(2+) transporter permease subunit FeoB;Ferrous iron transport protein B	568	584	1.02817	1	4752	582	2319	2255.1	1	1	1	1	1	1	1	1	1	1	1	1	1	1	1	1	1	1	1	1	1	1	1	1	1	1	1	1	1	1	1	1	1	1	1	1	1	1	1
sadA~~~hia	sadA;hia	trimeric autotransporter adhesin SadA;hypothetical protein;Peptide transport system permease protein sapB;YadA family autotransporter adhesin;Hemagglutinin;Autotransporter adhesin	568	624	1.09859	1	4749	372	4437	3937.12	1	1	1	1	1	1	1	1	1	1	1	1	1	1	1	1	1	1	1	1	1	1	1	1	1	1	1	1	1	1	1	1	1	1	1	1	1	1	1
group_1740	clpA	ATP-dependent Clp protease ATP-binding subunit;ATP-dependent Clp protease ATP-binding subunit ClpA;Clp protease;AAA family ATPase	568	583	1.02641	1	4745	159	2481	2219.07	1	1	1	1	1	1	1	1	1	1	1	1	1	1	1	1	1	1	1	1	1	1	1	1	1	1	1	1	1	1	1	1	1	1	1	1	1	1	1
group_1736	purR	HTH-type transcriptional repressor purR;Purine nucleotide synthesis repressor;substrate-binding domain-containing protein;HTH-type transcriptional repressor PurR	568	570	1.00352	1	4738	351	1026	1022.43	1	1	1	1	1	1	1	1	1	1	1	1	1	1	1	1	1	1	1	1	1	1	1	1	1	1	1	1	1	1	1	1	1	1	1	1	1	1	1
group_1734	lysR	DNA-binding transcriptional regulator LysR family	568	568	1	1	4736	744	948	947.641	1	1	1	1	1	1	1	1	1	1	1	1	1	1	1	1	1	1	1	1	1	1	1	1	1	1	1	1	1	1	1	1	1	1	1	1	1	1	1
ompS2~~~ompS1	ompS2;ompS1	porin OmpS2;Outer membrane protein S1;porin OmpS1	568	568	1	1	4730	972	1179	1178.59	1	1	1	1	1	1	1	1	1	1	1	1	1	1	1	1	1	1	1	1	1	1	1	1	1	1	1	1	1	1	1	1	1	1	1	1	1	1	1
group_1728		Maltose O-acetyltransferase	568	568	1	1	4728	261	552	551.488	1	1	1	1	1	1	1	1	1	1	1	1	1	1	1	1	1	1	1	1	1	1	1	1	1	1	1	1	1	1	1	1	1	1	1	1	1	1	1
group_1727		hypothetical protein;Putative cytoplasmic protein;Transport protein	568	570	1.00352	1	4727	198	741	738.621	1	1	1	1	1	1	1	1	1	1	1	1	1	1	1	1	1	1	1	1	1	1	1	1	1	1	1	1	1	1	1	1	1	1	1	1	1	1	1
uvrY	uvrY	response regulator;Response regulator;UvrY/SirA/GacA family response regulator transcription factor	568	569	1.00176	1	4725	324	657	655.323	1	1	1	1	1	1	1	1	1	1	1	1	1	1	1	1	1	1	1	1	1	1	1	1	1	1	1	1	1	1	1	1	1	1	1	1	1	1	1
pykF	pykF	pyruvate kinase PykF;Pyruvate kinase	568	570	1.00352	1	4723	540	1413	1408.51	1	1	1	1	1	1	1	1	1	1	1	1	1	1	1	1	1	1	1	1	1	1	1	1	1	1	1	1	1	1	1	1	1	1	1	1	1	1	1
dusA	dusA	tRNA dihydrouridine(20/20a) synthase DusA	568	568	1	1	4720	837	1038	998.783	1	1	1	1	1	1	1	1	1	1	1	1	1	1	1	1	1	1	1	1	1	1	1	1	1	1	1	1	1	1	1	1	1	1	1	1	1	1	1
ybdK	ybdK	hypothetical protein;YbdK family carboxylate-amine ligase;Carboxylate-amine ligase	568	568	1	1	4718	276	1119	441.882	1	1	1	1	1	1	1	1	1	1	1	1	1	1	1	1	1	1	1	1	1	1	1	1	1	1	1	1	1	1	1	1	1	1	1	1	1	1	1
treA	treA	Periplasmic trehalase;hypothetical protein	568	574	1.01056	1	4716	243	1968	1679.93	1	1	1	1	1	1	1	1	1	1	1	1	1	1	1	1	1	1	1	1	1	1	1	1	1	1	1	1	1	1	1	1	1	1	1	1	1	1	1
napA	napA	Periplasmic nitrate reductase;hypothetical protein;Nitrate reductase;nitrate reductase catalytic subunit NapA	568	575	1.01232	1	4715	237	2526	2493.9	1	1	1	1	1	1	1	1	1	1	1	1	1	1	1	1	1	1	1	1	1	1	1	1	1	1	1	1	1	1	1	1	1	1	1	1	1	1	1
group_1722		DUF4942 domain-containing protein	568	568	1	1	4714	435	447	446.979	1	1	1	1	1	1	1	1	1	1	1	1	1	1	1	1	1	1	1	1	1	1	1	1	1	1	1	1	1	1	1	1	1	1	1	1	1	1	1
dcuA~~~dcuB	dcuA;dcuB	Anaerobic C4-dicarboxylate transporter DcuB;Anaerobic C4-dicarboxylate transporter;C4-dicarboxylate transporter DcuB;anaerobic C4-dicarboxylate transporter DcuB	568	570	1.00352	1	4713	429	1341	1336.04	1	1	1	1	1	1	1	1	1	1	1	1	1	1	1	1	1	1	1	1	1	1	1	1	1	1	1	1	1	1	1	1	1	1	1	1	1	1	1
group_1721	rcnA	ABC-type nickel/cobalt efflux system permease component RcnA;nickel/cobalt efflux protein RcnA	568	568	1	1	4712	837	915	866.018	1	1	1	1	1	1	1	1	1	1	1	1	1	1	1	1	1	1	1	1	1	1	1	1	1	1	1	1	1	1	1	1	1	1	1	1	1	1	1
fadL	fadL	hypothetical protein;Long-chain fatty acid transport protein;long-chain fatty acid transporter FadL	568	570	1.00352	1	4711	363	1308	1301.58	1	1	1	1	1	1	1	1	1	1	1	1	1	1	1	1	1	1	1	1	1	1	1	1	1	1	1	1	1	1	1	1	1	1	1	1	1	1	1
group_1720		fumarylacetoacetate hydrolase family protein;Fumarylacetoacetate hydrolase family protein	568	568	1	1	4710	531	660	659.773	1	1	1	1	1	1	1	1	1	1	1	1	1	1	1	1	1	1	1	1	1	1	1	1	1	1	1	1	1	1	1	1	1	1	1	1	1	1	1
btuC	btuC	hypothetical protein;vitamin B12 ABC transporter permease BtuC	568	570	1.00352	1	4709	240	981	977.6	1	1	1	1	1	1	1	1	1	1	1	1	1	1	1	1	1	1	1	1	1	1	1	1	1	1	1	1	1	1	1	1	1	1	1	1	1	1	1
hopD	hopD	hypothetical protein;leader peptidase HopD	568	569	1.00176	1	4708	252	468	467.399	1	1	1	1	1	1	1	1	1	1	1	1	1	1	1	1	1	1	1	1	1	1	1	1	1	1	1	1	1	1	1	1	1	1	1	1	1	1	1
thiM	thiM	Hydroxyethylthiazole kinase;hydroxyethylthiazole kinase	568	569	1.00176	1	4707	147	798	796.598	1	1	1	1	1	1	1	1	1	1	1	1	1	1	1	1	1	1	1	1	1	1	1	1	1	1	1	1	1	1	1	1	1	1	1	1	1	1	1
ymdA	ymdA	hypothetical protein;Uncharacterized protein YmdA;putative protein YmdA	568	569	1.00176	1	4706	126	321	320.293	1	1	1	1	1	1	1	1	1	1	1	1	1	1	1	1	1	1	1	1	1	1	1	1	1	1	1	1	1	1	1	1	1	1	1	1	1	1	1
glpG	glpG	GlpG protein (Membrane protein of glp regulon);rhomboid family intramembrane serine protease GlpG;Intramembrane serine protease GlpG;Rhomboid intramembrane serine protease	568	575	1.01232	1	4705	204	831	818.473	1	1	1	1	1	1	1	1	1	1	1	1	1	1	1	1	1	1	1	1	1	1	1	1	1	1	1	1	1	1	1	1	1	1	1	1	1	1	1
recR	recR	Recombination protein RecR;recombination mediator RecR	568	568	1	1	4704	528	606	605.863	1	1	1	1	1	1	1	1	1	1	1	1	1	1	1	1	1	1	1	1	1	1	1	1	1	1	1	1	1	1	1	1	1	1	1	1	1	1	1
group_1719	mdlB	Multidrug resistance-like ATP-binding protein MdlB;SmdB family multidrug efflux ABC transporter permease/ATP-binding protein	568	568	1	1	4702	1686	1782	1781.83	1	1	1	1	1	1	1	1	1	1	1	1	1	1	1	1	1	1	1	1	1	1	1	1	1	1	1	1	1	1	1	1	1	1	1	1	1	1	1
hybG	hybG	hydrogenase maturation factor HybG	568	568	1	1	4701	249	255	249.011	1	1	1	1	1	1	1	1	1	1	1	1	1	1	1	1	1	1	1	1	1	1	1	1	1	1	1	1	1	1	1	1	1	1	1	1	1	1	1
ssaV~~~escV	ssaV;escV	hypothetical protein;SPI-2 type III secretion system apparatus protein SsaV;EscV/YscV/HrcV family type III secretion system export apparatus protein	568	569	1.00176	1	4699	261	2046	2040.13	1	1	1	1	1	1	1	1	1	1	1	1	1	1	1	1	1	1	1	1	1	1	1	1	1	1	1	1	1	1	1	1	1	1	1	1	1	1	1
acrB	acrB	efflux RND transporter permease subunit;Efflux pump membrane transporter;Acriflavin resistance protein B;Acriflavine resistance protein B;multidrug efflux RND transporter permease subunit AcrB;RND efflux system;efflux RND transporter permease AcrB	568	574	1.01056	1	4698	294	3156	3123.03	1	1	1	1	1	1	1	1	1	1	1	1	1	1	1	1	1	1	1	1	1	1	1	1	1	1	1	1	1	1	1	1	1	1	1	1	1	1	1
group_1717	sfsB	DNA-binding protein;putative transcriptional regulator lambda repressor-like DNA-binding domain	568	568	1	1	4697	249	291	249.074	1	1	1	1	1	1	1	1	1	1	1	1	1	1	1	1	1	1	1	1	1	1	1	1	1	1	1	1	1	1	1	1	1	1	1	1	1	1	1
cueO	cueO	Multicopper oxidase CueO;multicopper oxidase CueO;Plastocyanin-like domain-containing protein	568	569	1.00176	1	4696	603	1611	1607.84	1	1	1	1	1	1	1	1	1	1	1	1	1	1	1	1	1	1	1	1	1	1	1	1	1	1	1	1	1	1	1	1	1	1	1	1	1	1	1
yheO	yheO	hypothetical protein;YheO-like PAS domain protein;Uncharacterized protein YheO;Putative DNA-binding transcriptional regulator;Putative DNA-binding protein;putative transcriptional regulator YheO contains PAS and DNA-binding HTH domains;Putative regulator;putative protein YheO	568	584	1.02817	1	4695	165	723	699.38	1	1	1	1	1	1	1	1	1	1	1	1	1	1	1	1	1	1	1	1	1	1	1	1	1	1	1	1	1	1	1	1	1	1	1	1	1	1	1
rutR	rutR	TetR family transcriptional regulator;HTH-type transcriptional regulator RutR	568	568	1	1	4694	294	639	638.393	1	1	1	1	1	1	1	1	1	1	1	1	1	1	1	1	1	1	1	1	1	1	1	1	1	1	1	1	1	1	1	1	1	1	1	1	1	1	1
infB	infB	Translation initiation factor IF-2 a GTPase;translation initiation factor IF-2	568	568	1	1	4692	2679	2856	2679.31	1	1	1	1	1	1	1	1	1	1	1	1	1	1	1	1	1	1	1	1	1	1	1	1	1	1	1	1	1	1	1	1	1	1	1	1	1	1	1
gltA	gltA	hypothetical protein;citrate synthase	568	569	1.00176	1	4691	366	1386	1282.21	1	1	1	1	1	1	1	1	1	1	1	1	1	1	1	1	1	1	1	1	1	1	1	1	1	1	1	1	1	1	1	1	1	1	1	1	1	1	1
pAAR	pAAR	hypothetical protein;type IV secretion protein Rhs;RHS protein;Zn-binding Pro-Ala-Ala-Arg (PAAR) domain involved in Type VI secretion	568	570	1.00352	1	4690	165	4134	4119.17	1	1	1	1	1	1	1	1	1	1	1	1	1	1	1	1	1	1	1	1	1	1	1	1	1	1	1	1	1	1	1	1	1	1	1	1	1	1	1
rbsA	rbsA	hypothetical protein;ribose ABC transporter ATP-binding protein RbsA	568	569	1.00176	1	4687	249	1506	1503.47	1	1	1	1	1	1	1	1	1	1	1	1	1	1	1	1	1	1	1	1	1	1	1	1	1	1	1	1	1	1	1	1	1	1	1	1	1	1	1
yghA	yghA	Uncharacterized oxidoreductase YghA;SDR family oxidoreductase	568	568	1	1	4686	693	885	884.662	1	1	1	1	1	1	1	1	1	1	1	1	1	1	1	1	1	1	1	1	1	1	1	1	1	1	1	1	1	1	1	1	1	1	1	1	1	1	1
lpxO	lpxO	Membrane-bound beta-hydroxylase;lipid A hydroxylase LpxO	568	569	1.00176	1	4684	243	909	907.45	1	1	1	1	1	1	1	1	1	1	1	1	1	1	1	1	1	1	1	1	1	1	1	1	1	1	1	1	1	1	1	1	1	1	1	1	1	1	1
group_1714	trpS	hypothetical protein;tryptophan--tRNA ligase	568	568	1	1	4682	834	1014	1013.68	1	1	1	1	1	1	1	1	1	1	1	1	1	1	1	1	1	1	1	1	1	1	1	1	1	1	1	1	1	1	1	1	1	1	1	1	1	1	1
group_1712	csgD	Csgab operon transcriptional regulator;transcriptional regulator CsgD;DNA-binding transcriptional regulator CsgD	568	569	1.00176	1	4680	297	651	650.005	1	1	1	1	1	1	1	1	1	1	1	1	1	1	1	1	1	1	1	1	1	1	1	1	1	1	1	1	1	1	1	1	1	1	1	1	1	1	1
lprI	lprI	LprI domain-containing protein;Lysozyme inhibitor LprI	568	568	1	1	4679	330	342	330.042	1	1	1	1	1	1	1	1	1	1	1	1	1	1	1	1	1	1	1	1	1	1	1	1	1	1	1	1	1	1	1	1	1	1	1	1	1	1	1
group_1710	sfsB	HTH-35 domain-containing protein;putative transcriptional regulator lambda repressor-like DNA-binding domain	568	568	1	1	4677	174	222	220.901	1	1	1	1	1	1	1	1	1	1	1	1	1	1	1	1	1	1	1	1	1	1	1	1	1	1	1	1	1	1	1	1	1	1	1	1	1	1	1
group_1709	wcaG	GDP-L-fucose synthase;Nucleoside-diphosphate-sugar epimerase	568	568	1	1	4676	879	966	965.847	1	1	1	1	1	1	1	1	1	1	1	1	1	1	1	1	1	1	1	1	1	1	1	1	1	1	1	1	1	1	1	1	1	1	1	1	1	1	1
nrfE~~~ccmF	nrfE;ccmF	Cytochrome c-type biogenesis protein F2;Cytochrome c heme lyase subunit CcmF;heme lyase NrfEFG subunit NrfE;Cytochrome c biogenesis protein CcmF	568	569	1.00176	1	4674	390	2031	1928.1	1	1	1	1	1	1	1	1	1	1	1	1	1	1	1	1	1	1	1	1	1	1	1	1	1	1	1	1	1	1	1	1	1	1	1	1	1	1	1
ilvI	ilvI	Acetolactate synthase isozyme 3 large subunit;Acetolactate synthase;acetolactate synthase 3 large subunit	568	569	1.00176	1	4672	528	1725	1721.44	1	1	1	1	1	1	1	1	1	1	1	1	1	1	1	1	1	1	1	1	1	1	1	1	1	1	1	1	1	1	1	1	1	1	1	1	1	1	1
ftsK	ftsK	Cell division protein FtsK;DNA translocase FtsK	568	577	1.01585	1	4671	1518	4365	3938.21	1	1	1	1	1	1	1	1	1	1	1	1	1	1	1	1	1	1	1	1	1	1	1	1	1	1	1	1	1	1	1	1	1	1	1	1	1	1	1
eutR	eutR	HTH-type transcriptional regulator EutR;Ethanolamine operon regulatory protein	568	569	1.00176	1	4670	414	1053	1008.81	1	1	1	1	1	1	1	1	1	1	1	1	1	1	1	1	1	1	1	1	1	1	1	1	1	1	1	1	1	1	1	1	1	1	1	1	1	1	1
group_1704		Mutator family transposase;IS256 family transposase	568	568	1	1	4665	252	444	291.202	1	1	1	1	1	1	1	1	1	1	1	1	1	1	1	1	1	1	1	1	1	1	1	1	1	1	1	1	1	1	1	1	1	1	1	1	1	1	1
glpD	glpD	glycerol-3-phosphate dehydrogenase;Glycerol-3-phosphate dehydrogenase	568	571	1.00528	1	4664	546	1509	1500.75	1	1	1	1	1	1	1	1	1	1	1	1	1	1	1	1	1	1	1	1	1	1	1	1	1	1	1	1	1	1	1	1	1	1	1	1	1	1	1
otsB	otsB	trehalose-phosphatase	568	568	1	1	4662	804	903	902.662	1	1	1	1	1	1	1	1	1	1	1	1	1	1	1	1	1	1	1	1	1	1	1	1	1	1	1	1	1	1	1	1	1	1	1	1	1	1	1
group_1702	tar	Chemo-receptor protein;Methyl-accepting chemotaxis protein (MCP)	568	568	1	1	4661	465	1155	1152.57	1	1	1	1	1	1	1	1	1	1	1	1	1	1	1	1	1	1	1	1	1	1	1	1	1	1	1	1	1	1	1	1	1	1	1	1	1	1	1
group_1701	gntT	Gnt-I system;gluconate transporter	568	569	1.00176	1	4659	321	1317	1314.35	1	1	1	1	1	1	1	1	1	1	1	1	1	1	1	1	1	1	1	1	1	1	1	1	1	1	1	1	1	1	1	1	1	1	1	1	1	1	1
motA	motA	flagellar motor stator protein MotA	568	568	1	1	4655	888	915	888.048	1	1	1	1	1	1	1	1	1	1	1	1	1	1	1	1	1	1	1	1	1	1	1	1	1	1	1	1	1	1	1	1	1	1	1	1	1	1	1
pepP	pepP	Xaa-Pro aminopeptidase	568	568	1	1	4654	1275	1317	1316.93	1	1	1	1	1	1	1	1	1	1	1	1	1	1	1	1	1	1	1	1	1	1	1	1	1	1	1	1	1	1	1	1	1	1	1	1	1	1	1
nikR	nikR	nickel-responsive transcriptional regulator NikR	568	568	1	1	4653	318	438	437.789	1	1	1	1	1	1	1	1	1	1	1	1	1	1	1	1	1	1	1	1	1	1	1	1	1	1	1	1	1	1	1	1	1	1	1	1	1	1	1
mazG	mazG	Nucleoside triphosphate pyrophosphohydrolase;nucleoside triphosphate pyrophosphohydrolase	568	569	1.00176	1	4651	246	801	798.912	1	1	1	1	1	1	1	1	1	1	1	1	1	1	1	1	1	1	1	1	1	1	1	1	1	1	1	1	1	1	1	1	1	1	1	1	1	1	1
misL~~~aidA	misL;aidA	putative autotransporter;autotransporter outer membrane beta-barrel domain-containing protein;Autotransporter adhesin AidA	568	569	1.00176	1	4650	537	2868	2862.45	1	1	1	1	1	1	1	1	1	1	1	1	1	1	1	1	1	1	1	1	1	1	1	1	1	1	1	1	1	1	1	1	1	1	1	1	1	1	1
oapA	oapA	Cell division protein YtfB;Cell division protein YtfB/OapA (opacity-associated protein A)	568	568	1	1	4649	636	672	636.127	1	1	1	1	1	1	1	1	1	1	1	1	1	1	1	1	1	1	1	1	1	1	1	1	1	1	1	1	1	1	1	1	1	1	1	1	1	1	1
group_1697		Glycerol dehydratase reactivation factor	568	568	1	1	4648	231	369	368.757	1	1	1	1	1	1	1	1	1	1	1	1	1	1	1	1	1	1	1	1	1	1	1	1	1	1	1	1	1	1	1	1	1	1	1	1	1	1	1
group_1694	tolC	outer membrane channel protein TolC	568	568	1	1	4644	1431	1479	1478.92	1	1	1	1	1	1	1	1	1	1	1	1	1	1	1	1	1	1	1	1	1	1	1	1	1	1	1	1	1	1	1	1	1	1	1	1	1	1	1
group_1693	mviM	Virulence factor MviM;Gfo/Idh/MocA family oxidoreductase;virulence factor MviM	568	570	1.00352	1	4643	345	933	929.674	1	1	1	1	1	1	1	1	1	1	1	1	1	1	1	1	1	1	1	1	1	1	1	1	1	1	1	1	1	1	1	1	1	1	1	1	1	1	1
ssaS	ssaS	EscS/YscS/HrcS family type III secretion system export apparatus protein;SPI-2 type III secretion system apparatus protein SsaS	568	568	1	1	4642	219	267	266.868	1	1	1	1	1	1	1	1	1	1	1	1	1	1	1	1	1	1	1	1	1	1	1	1	1	1	1	1	1	1	1	1	1	1	1	1	1	1	1
sfbB~~~metN2	sfbB;metN2	virulence-associated ABC transporter ATP-binding protein SfbB	568	568	1	1	4639	1017	1194	1017.31	1	1	1	1	1	1	1	1	1	1	1	1	1	1	1	1	1	1	1	1	1	1	1	1	1	1	1	1	1	1	1	1	1	1	1	1	1	1	1
nCS2~~~ghxP	nCS2;ghxP	Permease;Xanthine/guanine/uracil/vitamin C permease GhxP/GhxQ nucleobase:cation symporter 2 ( NCS2) family;guanine/hypoxanthine transporter GhxP	568	568	1	1	4636	207	1350	1347.73	1	1	1	1	1	1	1	1	1	1	1	1	1	1	1	1	1	1	1	1	1	1	1	1	1	1	1	1	1	1	1	1	1	1	1	1	1	1	1
group_1690	arcA	two-component system response regulator ArcA;hypothetical protein	568	569	1.00176	1	4634	213	717	715.624	1	1	1	1	1	1	1	1	1	1	1	1	1	1	1	1	1	1	1	1	1	1	1	1	1	1	1	1	1	1	1	1	1	1	1	1	1	1	1
group_1687	ldcC	Ornithine decarboxylase;hypothetical protein;Arginine/lysine/ornithine decarboxylase;ornithine decarboxylase	568	573	1.0088	1	4631	219	2157	2136.75	1	1	1	1	1	1	1	1	1	1	1	1	1	1	1	1	1	1	1	1	1	1	1	1	1	1	1	1	1	1	1	1	1	1	1	1	1	1	1
yicC	yicC	Putative alpha helix protein;DUF1732 domain-containing protein;Protein YicC;YicC family protein;YicC-like family N-terminal region	568	570	1.00352	1	4629	246	867	863.337	1	1	1	1	1	1	1	1	1	1	1	1	1	1	1	1	1	1	1	1	1	1	1	1	1	1	1	1	1	1	1	1	1	1	1	1	1	1	1
group_1684	fadR	GntR family transcriptional regulator;DNA-binding transcriptional regulator FadR family	568	568	1	1	4627	735	750	749.974	1	1	1	1	1	1	1	1	1	1	1	1	1	1	1	1	1	1	1	1	1	1	1	1	1	1	1	1	1	1	1	1	1	1	1	1	1	1	1
tatB	tatB	Sec-independent protein translocase protein TatB	568	568	1	1	4622	477	549	548.873	1	1	1	1	1	1	1	1	1	1	1	1	1	1	1	1	1	1	1	1	1	1	1	1	1	1	1	1	1	1	1	1	1	1	1	1	1	1	1
yqcC	yqcC	DUF446 domain-containing protein	568	568	1	1	4621	327	330	329.989	1	1	1	1	1	1	1	1	1	1	1	1	1	1	1	1	1	1	1	1	1	1	1	1	1	1	1	1	1	1	1	1	1	1	1	1	1	1	1
treZ	treZ	Glycogen debranching protein GlgX;Putative hydrolase;malto-oligosyltrehalose trehalohydrolase	568	568	1	1	4620	996	1785	1775.69	1	1	1	1	1	1	1	1	1	1	1	1	1	1	1	1	1	1	1	1	1	1	1	1	1	1	1	1	1	1	1	1	1	1	1	1	1	1	1
cbiJ	cbiJ	Cobalt-precorrin-6A reductase;cobalt-precorrin-6A reductase	568	568	1	1	4619	543	792	791.562	1	1	1	1	1	1	1	1	1	1	1	1	1	1	1	1	1	1	1	1	1	1	1	1	1	1	1	1	1	1	1	1	1	1	1	1	1	1	1
mlaE	mlaE	Intermembrane phospholipid transport system permease protein MlaE;lipid asymmetry maintenance ABC transporter permease subunit MlaE	568	568	1	1	4616	546	783	782.583	1	1	1	1	1	1	1	1	1	1	1	1	1	1	1	1	1	1	1	1	1	1	1	1	1	1	1	1	1	1	1	1	1	1	1	1	1	1	1
group_1679	ulaA	hypothetical protein;PTS system ascorbate-specific transporter subunit IIC;PTS system sugar-specific permease component family protein;PTS ascorbate transporter subunit IIC;PTS sugar transporter subunit IIC	568	589	1.03697	1	4615	96	1392	1341.12	1	1	1	1	1	1	1	1	1	1	1	1	1	1	1	1	1	1	1	1	1	1	1	1	1	1	1	1	1	1	1	1	1	1	1	1	1	1	1
group_1678		hypothetical protein;hydrolase;HAD family phosphatase	568	570	1.00352	1	4614	138	864	860.968	1	1	1	1	1	1	1	1	1	1	1	1	1	1	1	1	1	1	1	1	1	1	1	1	1	1	1	1	1	1	1	1	1	1	1	1	1	1	1
argO	argO	Arginine exporter;Arginine exporter protein ArgO;arginine exporter ArgO	568	569	1.00176	1	4611	213	636	634.93	1	1	1	1	1	1	1	1	1	1	1	1	1	1	1	1	1	1	1	1	1	1	1	1	1	1	1	1	1	1	1	1	1	1	1	1	1	1	1
group_1676	modA	Molybdate transport system substrate-binding protein;molybdate ABC transporter substrate-binding protein	568	568	1	1	4610	639	711	710.873	1	1	1	1	1	1	1	1	1	1	1	1	1	1	1	1	1	1	1	1	1	1	1	1	1	1	1	1	1	1	1	1	1	1	1	1	1	1	1
yciO	yciO	YciO family;L-threonylcarbamoyladenylate synthase	568	568	1	1	4609	267	621	620.134	1	1	1	1	1	1	1	1	1	1	1	1	1	1	1	1	1	1	1	1	1	1	1	1	1	1	1	1	1	1	1	1	1	1	1	1	1	1	1
rfbC	rfbC	dTDP-4-dehydrorhamnose 35-epimerase	568	568	1	1	4608	549	597	549.085	1	1	1	1	1	1	1	1	1	1	1	1	1	1	1	1	1	1	1	1	1	1	1	1	1	1	1	1	1	1	1	1	1	1	1	1	1	1	1
fhuB	fhuB	hypothetical protein;Fe(3+)-hydroxamate ABC transporter permease FhuB	568	569	1.00176	1	4607	873	2058	2054.67	1	1	1	1	1	1	1	1	1	1	1	1	1	1	1	1	1	1	1	1	1	1	1	1	1	1	1	1	1	1	1	1	1	1	1	1	1	1	1
elaC	elaC	MBL fold metallo-hydrolase;Ribonuclease Z;Lactamase-B domain-containing protein;Ribonuclease BN tRNA processing enzyme	568	569	1.00176	1	4606	402	939	936.016	1	1	1	1	1	1	1	1	1	1	1	1	1	1	1	1	1	1	1	1	1	1	1	1	1	1	1	1	1	1	1	1	1	1	1	1	1	1	1
group_1672	citF	citrate lyase subunit alpha	568	568	1	1	4602	1458	1530	1529.87	1	1	1	1	1	1	1	1	1	1	1	1	1	1	1	1	1	1	1	1	1	1	1	1	1	1	1	1	1	1	1	1	1	1	1	1	1	1	1
gltJ	gltJ	ABC transmembrane type-1 domain-containing protein;glutamate/aspartate ABC transporter permease GltJ	568	568	1	1	4601	651	741	740.842	1	1	1	1	1	1	1	1	1	1	1	1	1	1	1	1	1	1	1	1	1	1	1	1	1	1	1	1	1	1	1	1	1	1	1	1	1	1	1
ybbJ	ybbJ	Inner membrane protein YbbJ;NfeD-like C-terminal partner-binding;Membrane protein implicated in regulation of membrane protease activity	568	569	1.00176	1	4600	150	453	452.046	1	1	1	1	1	1	1	1	1	1	1	1	1	1	1	1	1	1	1	1	1	1	1	1	1	1	1	1	1	1	1	1	1	1	1	1	1	1	1
group_1671	rpiR	MurR/RpiR family transcriptional regulator	568	568	1	1	4599	831	849	848.81	1	1	1	1	1	1	1	1	1	1	1	1	1	1	1	1	1	1	1	1	1	1	1	1	1	1	1	1	1	1	1	1	1	1	1	1	1	1	1
yqhD	yqhD	Iron-containing alcohol dehydrogenase;Alcohol dehydrogenase;alcohol dehydrogenase	568	568	1	1	4598	930	1164	1163.19	1	1	1	1	1	1	1	1	1	1	1	1	1	1	1	1	1	1	1	1	1	1	1	1	1	1	1	1	1	1	1	1	1	1	1	1	1	1	1
cafA~~~rne	cafA;rne	Ribonuclease G or E;Ribonuclease E;ribonuclease E	568	571	1.00528	1	4595	735	3204	3186.92	1	1	1	1	1	1	1	1	1	1	1	1	1	1	1	1	1	1	1	1	1	1	1	1	1	1	1	1	1	1	1	1	1	1	1	1	1	1	1
pstA	pstA	Phosphate transporter permease;phosphate ABC transporter permease PstA	568	569	1.00176	1	4594	348	891	889.508	1	1	1	1	1	1	1	1	1	1	1	1	1	1	1	1	1	1	1	1	1	1	1	1	1	1	1	1	1	1	1	1	1	1	1	1	1	1	1
aes	aes	acetyl esterase	568	568	1	1	4592	717	972	970.658	1	1	1	1	1	1	1	1	1	1	1	1	1	1	1	1	1	1	1	1	1	1	1	1	1	1	1	1	1	1	1	1	1	1	1	1	1	1	1
sstT	sstT	Serine/threonine transporter SstT;serine/threonine transporter SstT;Membrane transport protein;cation:dicarboxylase symporter family transporter;Putative transport protein	568	575	1.01232	1	4590	174	1314	1228.14	1	1	1	1	1	1	1	1	1	1	1	1	1	1	1	1	1	1	1	1	1	1	1	1	1	1	1	1	1	1	1	1	1	1	1	1	1	1	1
rsmA	rsmA	Ribosomal RNA small subunit methyltransferase A;16S rRNA (adenine(1518)-N(6)/adenine(1519)-N(6))-dimethyltransferase RsmA	568	568	1	1	4589	753	852	821.984	1	1	1	1	1	1	1	1	1	1	1	1	1	1	1	1	1	1	1	1	1	1	1	1	1	1	1	1	1	1	1	1	1	1	1	1	1	1	1
rplQ	rplQ	50S ribosomal protein L17	568	568	1	1	4588	372	384	383.979	1	1	1	1	1	1	1	1	1	1	1	1	1	1	1	1	1	1	1	1	1	1	1	1	1	1	1	1	1	1	1	1	1	1	1	1	1	1	1
group_1668	araJ	Transmembrane transport protein;MFS transporter;Major facilitator superfamily protein;putative arabinose efflux permease AraJ MFS family	568	569	1.00176	1	4587	489	1185	1182.32	1	1	1	1	1	1	1	1	1	1	1	1	1	1	1	1	1	1	1	1	1	1	1	1	1	1	1	1	1	1	1	1	1	1	1	1	1	1	1
mpl	mpl	UDP-N-acetylmuramate:L-alanyl-gamma-D-glutamyl-meso-diaminopimelate ligase;Mur ligase domain-containing protein;Mur ligase family catalytic domain protein	568	607	1.06866	1	4586	153	1419	1287.89	1	1	1	1	1	1	1	1	1	1	1	1	1	1	1	1	1	1	1	1	1	1	1	1	1	1	1	1	1	1	1	1	1	1	1	1	1	1	1
ppa	ppa	inorganic diphosphatase	568	568	1	1	4585	531	552	531.037	1	1	1	1	1	1	1	1	1	1	1	1	1	1	1	1	1	1	1	1	1	1	1	1	1	1	1	1	1	1	1	1	1	1	1	1	1	1	1
fliN	fliN	Flagellar motor switch protein FliN;Flagellar motor switch/type III secretory pathway protein FliN	568	568	1	1	4583	336	414	413.863	1	1	1	1	1	1	1	1	1	1	1	1	1	1	1	1	1	1	1	1	1	1	1	1	1	1	1	1	1	1	1	1	1	1	1	1	1	1	1
group_1666	rspA	L-rhamnonate dehydratase;L-talarate/galactarate dehydratase	568	569	1.00176	1	4582	360	1197	1194.89	1	1	1	1	1	1	1	1	1	1	1	1	1	1	1	1	1	1	1	1	1	1	1	1	1	1	1	1	1	1	1	1	1	1	1	1	1	1	1
group_1665	tehB	tellurite resistance methyltransferase TehB	568	568	1	1	4581	546	597	596.91	1	1	1	1	1	1	1	1	1	1	1	1	1	1	1	1	1	1	1	1	1	1	1	1	1	1	1	1	1	1	1	1	1	1	1	1	1	1	1
rpmF	rpmF	50S ribosomal protein L32	568	568	1	1	4578	174	234	174.106	1	1	1	1	1	1	1	1	1	1	1	1	1	1	1	1	1	1	1	1	1	1	1	1	1	1	1	1	1	1	1	1	1	1	1	1	1	1	1
ada	ada	bifunctional DNA-binding transcriptional regulator/O6-methylguanine-DNA methyltransferase Ada	568	568	1	1	4576	1020	1059	1058.88	1	1	1	1	1	1	1	1	1	1	1	1	1	1	1	1	1	1	1	1	1	1	1	1	1	1	1	1	1	1	1	1	1	1	1	1	1	1	1
trmB	trmB	hypothetical protein;tRNA (guanosine(46)-N7)-methyltransferase TrmB	568	569	1.00176	1	4575	192	720	718.956	1	1	1	1	1	1	1	1	1	1	1	1	1	1	1	1	1	1	1	1	1	1	1	1	1	1	1	1	1	1	1	1	1	1	1	1	1	1	1
rtcB	rtcB	RNA ligase RtcB family protein	568	568	1	1	4574	1110	1140	1139.95	1	1	1	1	1	1	1	1	1	1	1	1	1	1	1	1	1	1	1	1	1	1	1	1	1	1	1	1	1	1	1	1	1	1	1	1	1	1	1
cobS	cobS	Adenosylcobinamide-GDP ribazoletransferase;adenosylcobinamide-GDP ribazoletransferase	568	568	1	1	4573	615	744	743.773	1	1	1	1	1	1	1	1	1	1	1	1	1	1	1	1	1	1	1	1	1	1	1	1	1	1	1	1	1	1	1	1	1	1	1	1	1	1	1
group_1663		2-(5''-triphosphoribosyl)-3'-dephosphocoenzyme-A synthase	568	568	1	1	4572	684	699	698.974	1	1	1	1	1	1	1	1	1	1	1	1	1	1	1	1	1	1	1	1	1	1	1	1	1	1	1	1	1	1	1	1	1	1	1	1	1	1	1
group_1662		Membrane protein;Mobilization protein	568	568	1	1	4571	237	246	245.715	1	1	1	1	1	1	1	1	1	1	1	1	1	1	1	1	1	1	1	1	1	1	1	1	1	1	1	1	1	1	1	1	1	1	1	1	1	1	1
rlpA	rlpA	endolytic peptidoglycan transglycosylase RlpA	568	568	1	1	4570	1107	1146	1145.93	1	1	1	1	1	1	1	1	1	1	1	1	1	1	1	1	1	1	1	1	1	1	1	1	1	1	1	1	1	1	1	1	1	1	1	1	1	1	1
group_1661		cytoplasmic protein;Putative cytoplasmic protein;DUF4427 domain-containing protein	568	570	1.00352	1	4568	321	1266	1247.39	1	1	1	1	1	1	1	1	1	1	1	1	1	1	1	1	1	1	1	1	1	1	1	1	1	1	1	1	1	1	1	1	1	1	1	1	1	1	1
rfaP	rfaP	lipopolysaccharide core heptose(I) kinase RfaP	568	568	1	1	4567	798	810	798.021	1	1	1	1	1	1	1	1	1	1	1	1	1	1	1	1	1	1	1	1	1	1	1	1	1	1	1	1	1	1	1	1	1	1	1	1	1	1	1
group_1660		DUF1202 domain-containing protein	568	568	1	1	4566	978	1008	1007.95	1	1	1	1	1	1	1	1	1	1	1	1	1	1	1	1	1	1	1	1	1	1	1	1	1	1	1	1	1	1	1	1	1	1	1	1	1	1	1
cydX	cydX	cytochrome bd-I oxidase subunit CydX	568	568	1	1	4565	96	114	113.968	1	1	1	1	1	1	1	1	1	1	1	1	1	1	1	1	1	1	1	1	1	1	1	1	1	1	1	1	1	1	1	1	1	1	1	1	1	1	1
group_1659		2-dehydro-3-deoxy-6-phosphogalactonate aldolase	568	568	1	1	4564	531	618	617.847	1	1	1	1	1	1	1	1	1	1	1	1	1	1	1	1	1	1	1	1	1	1	1	1	1	1	1	1	1	1	1	1	1	1	1	1	1	1	1
group_1658	sbmC	hypothetical protein;DNA gyrase inhibitor SbmC	568	570	1.00352	1	4563	126	468	466.268	1	1	1	1	1	1	1	1	1	1	1	1	1	1	1	1	1	1	1	1	1	1	1	1	1	1	1	1	1	1	1	1	1	1	1	1	1	1	1
ndk	ndk	Nucleoside diphosphate kinase;nucleoside-diphosphate kinase	568	568	1	1	4562	285	432	431.741	1	1	1	1	1	1	1	1	1	1	1	1	1	1	1	1	1	1	1	1	1	1	1	1	1	1	1	1	1	1	1	1	1	1	1	1	1	1	1
cadC	cadC	Transcriptional activator CadC;lysine decarboxylation/transport transcriptional activator CadC;hypothetical protein	568	572	1.00704	1	4561	399	1542	1531.31	1	1	1	1	1	1	1	1	1	1	1	1	1	1	1	1	1	1	1	1	1	1	1	1	1	1	1	1	1	1	1	1	1	1	1	1	1	1	1
lldR	lldR	hypothetical protein;DNA-binding transcriptional repressor LldR;transcriptional regulator LldR	568	570	1.00352	1	4560	171	798	773.721	1	1	1	1	1	1	1	1	1	1	1	1	1	1	1	1	1	1	1	1	1	1	1	1	1	1	1	1	1	1	1	1	1	1	1	1	1	1	1
group_1657	ccmD	Cytochrome C-type biogenesis protein;cytochrome c biogenesis protein CcmH;hypothetical protein;Cytochrome c-type biogenesis protein;CcmH_2 protein;Cytochrome c-type biogenesis protein CcmH/NrfG	568	569	1.00176	1	4559	177	1044	1017.8	1	1	1	1	1	1	1	1	1	1	1	1	1	1	1	1	1	1	1	1	1	1	1	1	1	1	1	1	1	1	1	1	1	1	1	1	1	1	1
group_1655		SGNH/GDSL hydrolase family protein;Outer membrane esterase	568	568	1	1	4557	1347	1971	1969.9	1	1	1	1	1	1	1	1	1	1	1	1	1	1	1	1	1	1	1	1	1	1	1	1	1	1	1	1	1	1	1	1	1	1	1	1	1	1	1
rluE	rluE	Ribosomal large subunit pseudouridine synthase E;23S rRNA pseudouridine(2457) synthase RluE	568	568	1	1	4556	654	738	737.704	1	1	1	1	1	1	1	1	1	1	1	1	1	1	1	1	1	1	1	1	1	1	1	1	1	1	1	1	1	1	1	1	1	1	1	1	1	1	1
clpP	clpP	ATP-dependent Clp protease proteolytic subunit;ATP-dependent Clp protease proteolytic subunit 1;ATP-dependent Clp endopeptidase proteolytic subunit ClpP	568	569	1.00176	1	4555	249	801	623.193	1	1	1	1	1	1	1	1	1	1	1	1	1	1	1	1	1	1	1	1	1	1	1	1	1	1	1	1	1	1	1	1	1	1	1	1	1	1	1
hfq	hfq	RNA-binding protein Hfq;RNA chaperone Hfq	568	568	1	1	4554	240	354	308.958	1	1	1	1	1	1	1	1	1	1	1	1	1	1	1	1	1	1	1	1	1	1	1	1	1	1	1	1	1	1	1	1	1	1	1	1	1	1	1
mutL	mutL	DNA mismatch repair protein;DNA mismatch repair protein MutL;DNA mismatch repair endonuclease MutL;hypothetical protein	568	572	1.00704	1	4551	237	1857	1841.85	1	1	1	1	1	1	1	1	1	1	1	1	1	1	1	1	1	1	1	1	1	1	1	1	1	1	1	1	1	1	1	1	1	1	1	1	1	1	1
astE	astE	succinylglutamate desuccinylase	568	568	1	1	4549	915	969	968.905	1	1	1	1	1	1	1	1	1	1	1	1	1	1	1	1	1	1	1	1	1	1	1	1	1	1	1	1	1	1	1	1	1	1	1	1	1	1	1
emrB	emrB	multidrug efflux MFS transporter permease subunit EmrB	568	568	1	1	4544	1539	1578	1539.14	1	1	1	1	1	1	1	1	1	1	1	1	1	1	1	1	1	1	1	1	1	1	1	1	1	1	1	1	1	1	1	1	1	1	1	1	1	1	1
group_1650	pstS	phosphate ABC transporter substrate-binding protein PstS	568	568	1	1	4543	999	1041	1040.93	1	1	1	1	1	1	1	1	1	1	1	1	1	1	1	1	1	1	1	1	1	1	1	1	1	1	1	1	1	1	1	1	1	1	1	1	1	1	1
bigA	bigA	Autotransporter adhesin BigA;hypothetical protein;autotransporter adhesin BigA;autotransporter domain-containing protein;Putative surface-exposed virulence protein BigA;BigA;Putative surface-exposed virulence protein	568	645	1.13556	1	4542	300	6003	4986.12	1	1	1	1	1	1	1	1	1	1	1	1	1	1	1	1	1	1	1	1	1	1	1	1	1	1	1	1	1	1	1	1	1	1	1	1	1	1	1
group_1648	dpiA	Transcriptional regulatory protein DpiA;hypothetical protein;two-component response regulator DpiA	568	568	1	1	4540	621	2310	686.313	1	1	1	1	1	1	1	1	1	1	1	1	1	1	1	1	1	1	1	1	1	1	1	1	1	1	1	1	1	1	1	1	1	1	1	1	1	1	1
group_1647	uhpC	hypothetical protein;MFS transporter family glucose-6-phosphate receptor UhpC;Sugar phosphate permease	568	568	1	1	4539	243	1389	1327.19	1	1	1	1	1	1	1	1	1	1	1	1	1	1	1	1	1	1	1	1	1	1	1	1	1	1	1	1	1	1	1	1	1	1	1	1	1	1	1
pduO	pduO	Cob(I)alamin adenosyltransferase PduO;two-domain cob(I)yrinic acid ac-diamide adenosyltransferase PduO	568	568	1	1	4538	393	1011	1008.82	1	1	1	1	1	1	1	1	1	1	1	1	1	1	1	1	1	1	1	1	1	1	1	1	1	1	1	1	1	1	1	1	1	1	1	1	1	1	1
ompC~~~ompF	ompC;ompF	Putative outer membrane porin C protein;Outer membrane porin DLP12 prophage;Outer membrane protein 1a (IAbf) porin;Outer membrane porin OmpC/OmpF/PhoE;porin OmpF	568	570	1.00352	1	4537	288	1092	1087.14	1	1	1	1	1	1	1	1	1	1	1	1	1	1	1	1	1	1	1	1	1	1	1	1	1	1	1	1	1	1	1	1	1	1	1	1	1	1	1
fucI	fucI	L-fucose isomerase	568	568	1	1	4535	1596	1776	1775.37	1	1	1	1	1	1	1	1	1	1	1	1	1	1	1	1	1	1	1	1	1	1	1	1	1	1	1	1	1	1	1	1	1	1	1	1	1	1	1
bapA~~~blp2	bapA;blp2	biofilm-associated protein BapA;Ig-like repeat protein Blp2;Ig-like domain-containing protein;Large repetitive protein	568	575	1.01232	1	4534	1599	11475	11332.1	1	1	1	1	1	1	1	1	1	1	1	1	1	1	1	1	1	1	1	1	1	1	1	1	1	1	1	1	1	1	1	1	1	1	1	1	1	1	1
yhdP	yhdP	AsmA-2 domain-containing protein;Membrane protein;AsmA2 domain-containing protein YhdP	568	569	1.00176	1	4533	495	3801	3790.32	1	1	1	1	1	1	1	1	1	1	1	1	1	1	1	1	1	1	1	1	1	1	1	1	1	1	1	1	1	1	1	1	1	1	1	1	1	1	1
roxA	roxA	Ribosomal protein L16 Arg81 hydroxylase contains JmjC domain;[50S ribosomal protein L16]-arginine 3-hydroxylase	568	568	1	1	4531	834	1122	1121.49	1	1	1	1	1	1	1	1	1	1	1	1	1	1	1	1	1	1	1	1	1	1	1	1	1	1	1	1	1	1	1	1	1	1	1	1	1	1	1
uspA	uspA	Universal stress A-like protein;Universal stress protein A;universal stress protein UspA	568	568	1	1	4529	249	468	434.382	1	1	1	1	1	1	1	1	1	1	1	1	1	1	1	1	1	1	1	1	1	1	1	1	1	1	1	1	1	1	1	1	1	1	1	1	1	1	1
group_1642		hypothetical protein;SPASM domain-containing protein;anaerobic sulfatase maturase	568	569	1.00176	1	4526	306	1269	1194.76	1	1	1	1	1	1	1	1	1	1	1	1	1	1	1	1	1	1	1	1	1	1	1	1	1	1	1	1	1	1	1	1	1	1	1	1	1	1	1
group_1641	citX	Apo-citrate lyase phosphoribosyl-dephospho-CoA transferase;Phosphoribosyl-dephospho-CoA transferase (holo-ACP synthetase)	568	568	1	1	4525	369	552	551.678	1	1	1	1	1	1	1	1	1	1	1	1	1	1	1	1	1	1	1	1	1	1	1	1	1	1	1	1	1	1	1	1	1	1	1	1	1	1	1
nuoN	nuoN	NADH-ubiquinone oxidoreductase chain N;NADH-quinone oxidoreductase subunit NuoN	568	569	1.00176	1	4524	183	1458	1455.44	1	1	1	1	1	1	1	1	1	1	1	1	1	1	1	1	1	1	1	1	1	1	1	1	1	1	1	1	1	1	1	1	1	1	1	1	1	1	1
tra5	tra5	Transposase InsO and inactivated derivatives;Integrase catalytic domain-containing protein	568	568	1	1	4523	261	288	261.048	1	1	1	1	1	1	1	1	1	1	1	1	1	1	1	1	1	1	1	1	1	1	1	1	1	1	1	1	1	1	1	1	1	1	1	1	1	1	1
group_1640		DUF2950 domain-containing protein	568	571	1.00528	1	4522	303	792	787.855	1	1	1	1	1	1	1	1	1	1	1	1	1	1	1	1	1	1	1	1	1	1	1	1	1	1	1	1	1	1	1	1	1	1	1	1	1	1	1
group_1639	bisC	molybdopterin-dependent oxidoreductase;Anaerobic dimethyl sulfoxide reductase subunit A;Anaerobic selenocysteine-containing dehydrogenase;dimethyl sulfoxide reductase subunit A	568	572	1.00704	1	4521	426	2430	2412.31	1	1	1	1	1	1	1	1	1	1	1	1	1	1	1	1	1	1	1	1	1	1	1	1	1	1	1	1	1	1	1	1	1	1	1	1	1	1	1
yifB	yifB	hypothetical protein;YifB family Mg chelatase-like AAA ATPase	568	590	1.03873	1	4520	522	1521	1454.99	1	1	1	1	1	1	1	1	1	1	1	1	1	1	1	1	1	1	1	1	1	1	1	1	1	1	1	1	1	1	1	1	1	1	1	1	1	1	1
lysO	lysO	Surface protein;Lysine exporter LysO;DUF340 domain-containing protein	568	569	1.00176	1	4519	171	900	898.455	1	1	1	1	1	1	1	1	1	1	1	1	1	1	1	1	1	1	1	1	1	1	1	1	1	1	1	1	1	1	1	1	1	1	1	1	1	1	1
pckA	pckA	Phosphoenolpyruvate carboxykinase;phosphoenolpyruvate carboxykinase (ATP);Phosphoenolpyruvate carboxykinase (ATP)	568	578	1.01761	1	4517	132	1620	1591.82	1	1	1	1	1	1	1	1	1	1	1	1	1	1	1	1	1	1	1	1	1	1	1	1	1	1	1	1	1	1	1	1	1	1	1	1	1	1	1
lpxK	lpxK	tetraacyldisaccharide 4'-kinase	568	569	1.00176	1	4516	360	978	976.329	1	1	1	1	1	1	1	1	1	1	1	1	1	1	1	1	1	1	1	1	1	1	1	1	1	1	1	1	1	1	1	1	1	1	1	1	1	1	1
nudB	nudB	dihydroneopterin triphosphate diphosphatase	568	568	1	1	4515	402	453	452.91	1	1	1	1	1	1	1	1	1	1	1	1	1	1	1	1	1	1	1	1	1	1	1	1	1	1	1	1	1	1	1	1	1	1	1	1	1	1	1
mdlB	mdlB	Multidrug resistance-like ATP-binding protein MdlA;SmdA family multidrug ABC transporter permease/ATP-binding protein;ABC transporter ATP-binding membrane protein	568	569	1.00176	1	4514	441	1773	1769.09	1	1	1	1	1	1	1	1	1	1	1	1	1	1	1	1	1	1	1	1	1	1	1	1	1	1	1	1	1	1	1	1	1	1	1	1	1	1	1
group_1638	narQ	Nitrate/nitrite sensor protein NarQ;nitrate/nitrite two-component system sensor histidine kinase NarQ;type IV pili methyl-accepting chemotaxis transducer N-terminal domain-containing protein	568	570	1.00352	1	4513	267	1701	1694.41	1	1	1	1	1	1	1	1	1	1	1	1	1	1	1	1	1	1	1	1	1	1	1	1	1	1	1	1	1	1	1	1	1	1	1	1	1	1	1
aaeA	aaeA	p-hydroxybenzoic acid efflux pump subunit aaeA;p-hydroxybenzoic acid efflux pump subunit AaeA	568	569	1.00176	1	4512	216	933	931.397	1	1	1	1	1	1	1	1	1	1	1	1	1	1	1	1	1	1	1	1	1	1	1	1	1	1	1	1	1	1	1	1	1	1	1	1	1	1	1
zipA	zipA	Cell division protein ZipA;hypothetical protein;cell division protein ZipA	568	569	1.00176	1	4510	123	987	984.501	1	1	1	1	1	1	1	1	1	1	1	1	1	1	1	1	1	1	1	1	1	1	1	1	1	1	1	1	1	1	1	1	1	1	1	1	1	1	1
gppA	gppA	Guanosine pentaphosphate phosphohydrolase;guanosine-5'-triphosphate3'-diphosphate diphosphatase	568	568	1	1	4509	651	1482	1480.44	1	1	1	1	1	1	1	1	1	1	1	1	1	1	1	1	1	1	1	1	1	1	1	1	1	1	1	1	1	1	1	1	1	1	1	1	1	1	1
glnQ	glnQ	ATP-binding cassette domain-containing protein;glutamine ABC transporter ATP-binding protein GlnQ;Glutamine transport ATP-binding protein GlnQ	568	571	1.00528	1	4506	189	771	717.925	1	1	1	1	1	1	1	1	1	1	1	1	1	1	1	1	1	1	1	1	1	1	1	1	1	1	1	1	1	1	1	1	1	1	1	1	1	1	1
hupB	hupB	DNA-binding protein HU-beta	568	568	1	1	4504	240	273	272.942	1	1	1	1	1	1	1	1	1	1	1	1	1	1	1	1	1	1	1	1	1	1	1	1	1	1	1	1	1	1	1	1	1	1	1	1	1	1	1
recF	recF	DNA replication and repair protein RecF;DNA replication/repair protein RecF	568	568	1	1	4503	1008	1074	1073.88	1	1	1	1	1	1	1	1	1	1	1	1	1	1	1	1	1	1	1	1	1	1	1	1	1	1	1	1	1	1	1	1	1	1	1	1	1	1	1
group_1633		hypothetical protein;fimbrial protein	568	568	1	1	4502	351	573	572.609	1	1	1	1	1	1	1	1	1	1	1	1	1	1	1	1	1	1	1	1	1	1	1	1	1	1	1	1	1	1	1	1	1	1	1	1	1	1	1
nusA	nusA	L factor;Transcription antitermination factor NusA contains S1 and KH domains;Transcription termination/antitermination protein NusA	568	569	1.00176	1	4501	282	1503	1500.5	1	1	1	1	1	1	1	1	1	1	1	1	1	1	1	1	1	1	1	1	1	1	1	1	1	1	1	1	1	1	1	1	1	1	1	1	1	1	1
ssb1	ssb1	single-stranded DNA-binding protein SSB1	568	568	1	1	4500	444	531	530.847	1	1	1	1	1	1	1	1	1	1	1	1	1	1	1	1	1	1	1	1	1	1	1	1	1	1	1	1	1	1	1	1	1	1	1	1	1	1	1
group_1628		hypothetical protein;Cytoplasmic protein	568	568	1	1	4493	804	1278	1055.06	1	1	1	1	1	1	1	1	1	1	1	1	1	1	1	1	1	1	1	1	1	1	1	1	1	1	1	1	1	1	1	1	1	1	1	1	1	1	1
group_1627	uhpC	hypothetical protein;MFS transporter;Sugar phosphate permease	568	569	1.00176	1	4492	138	1326	1322.22	1	1	1	1	1	1	1	1	1	1	1	1	1	1	1	1	1	1	1	1	1	1	1	1	1	1	1	1	1	1	1	1	1	1	1	1	1	1	1
sunT~~~siiF	sunT;siiF	hypothetical protein;antibiotic ABC transporter ATP-binding protein;Peptidase domain-containing ABC transporter;SPI-4 type I secretion system protein SiiF;Type-1 secretion protein;Uncharacterized protein spi4_Q	568	579	1.01937	1	4489	129	2067	1864.54	1	1	1	1	1	1	1	1	1	1	1	1	1	1	1	1	1	1	1	1	1	1	1	1	1	1	1	1	1	1	1	1	1	1	1	1	1	1	1
rsxC	rsxC	hypothetical protein;electron transport complex subunit RsxC	568	573	1.0088	1	4488	291	2505	2170.05	1	1	1	1	1	1	1	1	1	1	1	1	1	1	1	1	1	1	1	1	1	1	1	1	1	1	1	1	1	1	1	1	1	1	1	1	1	1	1
group_1623	melB	MFS transporter;Putative xylose-proton symporter Xylose transporter;Na+/melibiose symporter or related transporter	568	570	1.00352	1	4486	186	1374	1369.18	1	1	1	1	1	1	1	1	1	1	1	1	1	1	1	1	1	1	1	1	1	1	1	1	1	1	1	1	1	1	1	1	1	1	1	1	1	1	1
group_1621	yicI	Alpha-xylosidase BoGH31A;Alpha-glucosidases family 31 of glycosyl hydrolases;Glycoside hydrolase family 31 protein;family 31 glucosidase;hypothetical protein;Hydrolase;Alpha-glucosidase/xylosidase GH31 family	568	572	1.00704	1	4482	132	2040	2025.26	1	1	1	1	1	1	1	1	1	1	1	1	1	1	1	1	1	1	1	1	1	1	1	1	1	1	1	1	1	1	1	1	1	1	1	1	1	1	1
fabI	fabI	Enoyl-[acyl-carrier-protein] reductase [NADH] FabI;enoyl-ACP reductase FabI	568	568	1	1	4481	411	798	797.319	1	1	1	1	1	1	1	1	1	1	1	1	1	1	1	1	1	1	1	1	1	1	1	1	1	1	1	1	1	1	1	1	1	1	1	1	1	1	1
ybdN	ybdN	DUF3440 domain-containing protein;hypothetical protein;phosphoadenosine phosphosulfate reductase;Co-activator of prophage gene expression IbrA	568	620	1.09155	1	4480	234	1236	1132.32	1	1	1	1	1	1	1	1	1	1	1	1	1	1	1	1	1	1	1	1	1	1	1	1	1	1	1	1	1	1	1	1	1	1	1	1	1	1	1
argG	argG	argininosuccinate synthase;Argininosuccinate synthase	568	571	1.00528	1	4479	534	1344	1337.13	1	1	1	1	1	1	1	1	1	1	1	1	1	1	1	1	1	1	1	1	1	1	1	1	1	1	1	1	1	1	1	1	1	1	1	1	1	1	1
celF~~~melA	celF;melA	Alpha-galactosidase;Alpha-galactosidase/6-phospho-beta-glucosidase family 4 of glycosyl hydrolase;alpha-galactosidase	568	580	1.02113	1	4477	213	1353	1324.47	1	1	1	1	1	1	1	1	1	1	1	1	1	1	1	1	1	1	1	1	1	1	1	1	1	1	1	1	1	1	1	1	1	1	1	1	1	1	1
ytcJ	ytcJ	Putative periplasmic protein;amidohydrolase;hypothetical protein;putative amidohydrolase YtcJ	568	570	1.00352	1	4473	174	1701	1694.89	1	1	1	1	1	1	1	1	1	1	1	1	1	1	1	1	1	1	1	1	1	1	1	1	1	1	1	1	1	1	1	1	1	1	1	1	1	1	1
group_1619		hypothetical protein;Putative glycosyl transferase;Glycosyl transferase;putative sugar hydrolase contains GT1 and HAD domains	568	576	1.01408	1	4472	123	1950	1791.33	1	1	1	1	1	1	1	1	1	1	1	1	1	1	1	1	1	1	1	1	1	1	1	1	1	1	1	1	1	1	1	1	1	1	1	1	1	1	1
rsxD	rsxD	RnfABCDGE type electron transport complex subunit D;electron transport complex subunit RsxD	568	568	1	1	4471	408	1059	1057.52	1	1	1	1	1	1	1	1	1	1	1	1	1	1	1	1	1	1	1	1	1	1	1	1	1	1	1	1	1	1	1	1	1	1	1	1	1	1	1
group_1618	tar	MCP four helix bundle domain-containing protein;Methyl-accepting chemotaxis protein (MCP)	568	569	1.00176	1	4470	369	1566	1563.12	1	1	1	1	1	1	1	1	1	1	1	1	1	1	1	1	1	1	1	1	1	1	1	1	1	1	1	1	1	1	1	1	1	1	1	1	1	1	1
glgX	glgX	glycogen debranching protein GlgX	568	568	1	1	4469	1536	1977	1975.45	1	1	1	1	1	1	1	1	1	1	1	1	1	1	1	1	1	1	1	1	1	1	1	1	1	1	1	1	1	1	1	1	1	1	1	1	1	1	1
group_1616		hypothetical protein;Putative cytoplasmic protein;DUF2094 domain-containing protein	568	568	1	1	4467	267	789	787.901	1	1	1	1	1	1	1	1	1	1	1	1	1	1	1	1	1	1	1	1	1	1	1	1	1	1	1	1	1	1	1	1	1	1	1	1	1	1	1
group_1609	appC	Cytochrome bd ubiquinol oxidase subunit I;cytochrome ubiquinol oxidase subunit I;Cytochrome bd-type quinol oxidase subunit 1	568	569	1.00176	1	4455	246	1404	1401.53	1	1	1	1	1	1	1	1	1	1	1	1	1	1	1	1	1	1	1	1	1	1	1	1	1	1	1	1	1	1	1	1	1	1	1	1	1	1	1
ttrS	ttrS	two-component system sensor histidine kinase TtrS	568	568	1	1	4452	1779	1854	1779.26	1	1	1	1	1	1	1	1	1	1	1	1	1	1	1	1	1	1	1	1	1	1	1	1	1	1	1	1	1	1	1	1	1	1	1	1	1	1	1
glf	glf	UDP-galactopyranose mutase;hypothetical protein	568	629	1.10739	1	4451	264	1152	1030.53	1	1	1	1	1	1	1	1	1	1	1	1	1	1	1	1	1	1	1	1	1	1	1	1	1	1	1	1	1	1	1	1	1	1	1	1	1	1	1
tyrP	tyrP	Tyrosine transporter TyrP;tyrosine transporter TyrP	568	569	1.00176	1	4450	210	1269	1265.78	1	1	1	1	1	1	1	1	1	1	1	1	1	1	1	1	1	1	1	1	1	1	1	1	1	1	1	1	1	1	1	1	1	1	1	1	1	1	1
group_1607	fumA	hypothetical protein;Fumarate hydratase class I;class I fumarate hydratase FumA	568	569	1.00176	1	4448	276	1647	1642.33	1	1	1	1	1	1	1	1	1	1	1	1	1	1	1	1	1	1	1	1	1	1	1	1	1	1	1	1	1	1	1	1	1	1	1	1	1	1	1
fliR	fliR	Flagellar biosynthesis protein FliR;Flagellar biosynthetic protein FliR;flagellar biosynthetic protein FliR	568	569	1.00176	1	4446	234	795	793.692	1	1	1	1	1	1	1	1	1	1	1	1	1	1	1	1	1	1	1	1	1	1	1	1	1	1	1	1	1	1	1	1	1	1	1	1	1	1	1
fadJ	fadJ	enoyl-CoA hydratase-related protein;fatty acid oxidation complex subunit alpha FadJ	568	569	1.00176	1	4442	354	2148	2144.22	1	1	1	1	1	1	1	1	1	1	1	1	1	1	1	1	1	1	1	1	1	1	1	1	1	1	1	1	1	1	1	1	1	1	1	1	1	1	1
ppsA	ppsA	Phosphoenolpyruvate synthase;phosphoenolpyruvate synthase	568	570	1.00352	1	4440	93	2379	2370.69	1	1	1	1	1	1	1	1	1	1	1	1	1	1	1	1	1	1	1	1	1	1	1	1	1	1	1	1	1	1	1	1	1	1	1	1	1	1	1
tig	tig	trigger factor;Cell division trigger factor	568	569	1.00176	1	4438	351	1299	1296.82	1	1	1	1	1	1	1	1	1	1	1	1	1	1	1	1	1	1	1	1	1	1	1	1	1	1	1	1	1	1	1	1	1	1	1	1	1	1	1
pitA	pitA	Low-affinity inorganic phosphate transporter 2;Low-affinity inorganic phosphate transporter;inorganic phosphate transporter PitA;Phosphate transporter	568	570	1.00352	1	4437	180	1497	1491.69	1	1	1	1	1	1	1	1	1	1	1	1	1	1	1	1	1	1	1	1	1	1	1	1	1	1	1	1	1	1	1	1	1	1	1	1	1	1	1
group_1603		Ybl27;Cytoplasmic protein	568	568	1	1	4436	297	387	345.064	1	1	1	1	1	1	1	1	1	1	1	1	1	1	1	1	1	1	1	1	1	1	1	1	1	1	1	1	1	1	1	1	1	1	1	1	1	1	1
aspA	aspA	Aspartate ammonia-lyase;aspartate ammonia-lyase	568	571	1.00528	1	4435	297	1437	1429.31	1	1	1	1	1	1	1	1	1	1	1	1	1	1	1	1	1	1	1	1	1	1	1	1	1	1	1	1	1	1	1	1	1	1	1	1	1	1	1
group_1601	adhE	aldehyde dehydrogenase family protein;putative aldehyde dehydrogenase;Acyl-CoA reductase or other NAD-dependent aldehyde dehydrogenase	568	569	1.00176	1	4433	399	1485	1482.33	1	1	1	1	1	1	1	1	1	1	1	1	1	1	1	1	1	1	1	1	1	1	1	1	1	1	1	1	1	1	1	1	1	1	1	1	1	1	1
group_1599	citT	Citrate carrier;citrate/succinate antiporter CitT	568	569	1.00176	1	4431	528	1464	1461.37	1	1	1	1	1	1	1	1	1	1	1	1	1	1	1	1	1	1	1	1	1	1	1	1	1	1	1	1	1	1	1	1	1	1	1	1	1	1	1
gapA	gapA	Glyceraldehyde-3-phosphate dehydrogenase/erythrose-4-phosphate dehydrogenase;Glyceraldehyde 3-phosphate dehydrogenase A;glyceraldehyde-3-phosphate dehydrogenase	568	569	1.00176	1	4430	228	996	994.165	1	1	1	1	1	1	1	1	1	1	1	1	1	1	1	1	1	1	1	1	1	1	1	1	1	1	1	1	1	1	1	1	1	1	1	1	1	1	1
cesT	cesT	CesT family type III secretion system chaperone	568	568	1	1	4429	270	417	416.741	1	1	1	1	1	1	1	1	1	1	1	1	1	1	1	1	1	1	1	1	1	1	1	1	1	1	1	1	1	1	1	1	1	1	1	1	1	1	1
ygiQ	ygiQ	YgiQ family radical SAM protein	568	577	1.01585	1	4426	189	2172	2137.93	1	1	1	1	1	1	1	1	1	1	1	1	1	1	1	1	1	1	1	1	1	1	1	1	1	1	1	1	1	1	1	1	1	1	1	1	1	1	1
miaB	miaB	tRNA (N6-isopentenyl adenosine(37)-C2)-methylthiotransferase MiaB	568	568	1	1	4423	1386	1425	1424.93	1	1	1	1	1	1	1	1	1	1	1	1	1	1	1	1	1	1	1	1	1	1	1	1	1	1	1	1	1	1	1	1	1	1	1	1	1	1	1
yiaK	yiaK	hypothetical protein;3-dehydro-L-gulonate 2-dehydrogenase	568	569	1.00176	1	4422	375	999	997.149	1	1	1	1	1	1	1	1	1	1	1	1	1	1	1	1	1	1	1	1	1	1	1	1	1	1	1	1	1	1	1	1	1	1	1	1	1	1	1
hutU	hutU	urocanate hydratase	568	568	1	1	4421	1158	1686	1685.07	1	1	1	1	1	1	1	1	1	1	1	1	1	1	1	1	1	1	1	1	1	1	1	1	1	1	1	1	1	1	1	1	1	1	1	1	1	1	1
rimK	rimK	Ribosomal protein S6 glutaminyl transferase;30S ribosomal protein S6--L-glutamate ligase	568	569	1.00176	1	4420	297	903	901.35	1	1	1	1	1	1	1	1	1	1	1	1	1	1	1	1	1	1	1	1	1	1	1	1	1	1	1	1	1	1	1	1	1	1	1	1	1	1	1
hybC	hybC	hydrogenase 2 large subunit;hypothetical protein	568	569	1.00176	1	4418	369	1704	1701.04	1	1	1	1	1	1	1	1	1	1	1	1	1	1	1	1	1	1	1	1	1	1	1	1	1	1	1	1	1	1	1	1	1	1	1	1	1	1	1
fadH	fadH	24-dienoyl-CoA reductase;24-dienoyl-CoA reductase or related NADH-dependent reductase Old Yellow Enzyme (OYE) family	568	570	1.00352	1	4417	912	2019	2011.43	1	1	1	1	1	1	1	1	1	1	1	1	1	1	1	1	1	1	1	1	1	1	1	1	1	1	1	1	1	1	1	1	1	1	1	1	1	1	1
nadA	nadA	quinolinate synthase;quinolinate synthase NadA	568	570	1.00352	1	4415	339	1044	1040.26	1	1	1	1	1	1	1	1	1	1	1	1	1	1	1	1	1	1	1	1	1	1	1	1	1	1	1	1	1	1	1	1	1	1	1	1	1	1	1
ybgF~~~cpoB	ybgF;cpoB	tol-pal system protein YbgF;Tol-pal system protein YbgF;cell division protein CpoB	568	571	1.00528	1	4414	252	789	784.271	1	1	1	1	1	1	1	1	1	1	1	1	1	1	1	1	1	1	1	1	1	1	1	1	1	1	1	1	1	1	1	1	1	1	1	1	1	1	1
priC	priC	primosomal replication protein;primosomal replication protein N''	568	569	1.00176	1	4412	156	516	514.83	1	1	1	1	1	1	1	1	1	1	1	1	1	1	1	1	1	1	1	1	1	1	1	1	1	1	1	1	1	1	1	1	1	1	1	1	1	1	1
group_1594	fimD	Fimbrial usher protein;PapC/FimD family outer membrane usher protein;Fimbrial protein SteB;hypothetical protein;Outer membrane usher protein FimD/PapC	568	571	1.00528	1	4411	201	2658	2643.84	1	1	1	1	1	1	1	1	1	1	1	1	1	1	1	1	1	1	1	1	1	1	1	1	1	1	1	1	1	1	1	1	1	1	1	1	1	1	1
hyaB	hyaB	Hydrogenase-1 large subunit;hypothetical protein;nickel-dependent hydrogenase large subunit;Hydrogenase-1 large chain;Ni/Fe-hydrogenase large subunit	568	575	1.01232	1	4409	198	1794	1771.04	1	1	1	1	1	1	1	1	1	1	1	1	1	1	1	1	1	1	1	1	1	1	1	1	1	1	1	1	1	1	1	1	1	1	1	1	1	1	1
malZ	malZ	Maltodextrin glucosidase;maltodextrin glucosidase	568	569	1.00176	1	4407	195	1818	1814.8	1	1	1	1	1	1	1	1	1	1	1	1	1	1	1	1	1	1	1	1	1	1	1	1	1	1	1	1	1	1	1	1	1	1	1	1	1	1	1
stdB	stdB	hypothetical protein;PapC-N domain-containing protein;fimbrial outer membrane usher protein StdB;Fimbrial usher protein	568	581	1.02289	1	4406	390	2490	2432.23	1	1	1	1	1	1	1	1	1	1	1	1	1	1	1	1	1	1	1	1	1	1	1	1	1	1	1	1	1	1	1	1	1	1	1	1	1	1	1
ugd	ugd	UDP-glucose 6-dehydrogenase	568	568	1	1	4405	1170	1254	1170.15	1	1	1	1	1	1	1	1	1	1	1	1	1	1	1	1	1	1	1	1	1	1	1	1	1	1	1	1	1	1	1	1	1	1	1	1	1	1	1
tamB	tamB	Translocation and assembly module for autotransporter export inner membrane subunit;Uncharacterized protein YtfN;DUF490 domain-containing protein;Autotransporter translocation and assembly protein TamB;autotransporter assembly complex protein TamB	568	570	1.00352	1	4404	420	3780	3763.27	1	1	1	1	1	1	1	1	1	1	1	1	1	1	1	1	1	1	1	1	1	1	1	1	1	1	1	1	1	1	1	1	1	1	1	1	1	1	1
group_1592	nlpC	hypothetical protein;Cell wall-associated hydrolase NlpC_P60 family	568	568	1	1	4403	744	822	821.863	1	1	1	1	1	1	1	1	1	1	1	1	1	1	1	1	1	1	1	1	1	1	1	1	1	1	1	1	1	1	1	1	1	1	1	1	1	1	1
glgS	glgS	hypothetical protein;cell surface composition regulator GlgS	568	568	1	1	4402	96	204	203.81	1	1	1	1	1	1	1	1	1	1	1	1	1	1	1	1	1	1	1	1	1	1	1	1	1	1	1	1	1	1	1	1	1	1	1	1	1	1	1
eptA	eptA	Phosphoethanolamine transferase EptA specific for the 1 phosphate group of core-lipid A;Phosphoethanolamine transferase EptA;phosphoethanolamine transferase EptA	568	570	1.00352	1	4401	486	1644	1637.64	1	1	1	1	1	1	1	1	1	1	1	1	1	1	1	1	1	1	1	1	1	1	1	1	1	1	1	1	1	1	1	1	1	1	1	1	1	1	1
group_1591	araJ	Multidrug resistance protein;Multidrug translocase MdfA;putative arabinose efflux permease AraJ MFS family	568	569	1.00176	1	4400	450	1233	1230.83	1	1	1	1	1	1	1	1	1	1	1	1	1	1	1	1	1	1	1	1	1	1	1	1	1	1	1	1	1	1	1	1	1	1	1	1	1	1	1
assT	assT	Arylsulfate sulfotransferase;aryl-sulfate sulfotransferase;aryl-sulfate sulfotransferase N-terminal domain-containing protein;putative arylsulfate sulfotransferase;Arylsulfate sulfotransferase AssT	568	572	1.00704	1	4399	267	1797	1783.99	1	1	1	1	1	1	1	1	1	1	1	1	1	1	1	1	1	1	1	1	1	1	1	1	1	1	1	1	1	1	1	1	1	1	1	1	1	1	1
pat	pat	Protein acetyltransferase;Acyl-CoA synthetase;protein lysine acetyltransferase	568	569	1.00176	1	4398	795	2661	2656.25	1	1	1	1	1	1	1	1	1	1	1	1	1	1	1	1	1	1	1	1	1	1	1	1	1	1	1	1	1	1	1	1	1	1	1	1	1	1	1
group_1589	fimD	Fimbrial outer membrane usher protein;Outer membrane usher protein FimD/PapC	568	569	1.00176	1	4396	576	2490	2485.51	1	1	1	1	1	1	1	1	1	1	1	1	1	1	1	1	1	1	1	1	1	1	1	1	1	1	1	1	1	1	1	1	1	1	1	1	1	1	1
group_1587	pta	Phosphotransacetylase;phosphate acetyltransferase	568	569	1.00176	1	4394	246	1017	1015.14	1	1	1	1	1	1	1	1	1	1	1	1	1	1	1	1	1	1	1	1	1	1	1	1	1	1	1	1	1	1	1	1	1	1	1	1	1	1	1
group_1585	citA	Histidine kinase;Sensor histidine kinase DipB regulating citrate/malate metabolism	568	569	1.00176	1	4391	738	1659	1656.09	1	1	1	1	1	1	1	1	1	1	1	1	1	1	1	1	1	1	1	1	1	1	1	1	1	1	1	1	1	1	1	1	1	1	1	1	1	1	1
group_1584	ybhL	Inner membrane protein ybhL;Integral membrane protein YbhL putative Ca2+ regulator Bax inhibitor (BI-1)/TMBIM family	568	569	1.00176	1	4390	183	705	703.524	1	1	1	1	1	1	1	1	1	1	1	1	1	1	1	1	1	1	1	1	1	1	1	1	1	1	1	1	1	1	1	1	1	1	1	1	1	1	1
group_1583		Putative inner membrane protein;Inner membrane protein	568	568	1	1	4389	498	603	602.815	1	1	1	1	1	1	1	1	1	1	1	1	1	1	1	1	1	1	1	1	1	1	1	1	1	1	1	1	1	1	1	1	1	1	1	1	1	1	1
narZ	narZ	Respiratory nitrate reductase 2 alpha chain;nitrate reductase subunit alpha;Respiratory nitrate reductase 1 subunit alpha;Nitrate reductase subunit alpha	568	572	1.00704	1	4388	387	3744	3717.69	1	1	1	1	1	1	1	1	1	1	1	1	1	1	1	1	1	1	1	1	1	1	1	1	1	1	1	1	1	1	1	1	1	1	1	1	1	1	1
narJ	narJ	nitrate reductase molybdenum cofactor assembly chaperone;Respiratory nitrate reductase 1 subunit delta	568	570	1.00352	1	4387	273	711	708.437	1	1	1	1	1	1	1	1	1	1	1	1	1	1	1	1	1	1	1	1	1	1	1	1	1	1	1	1	1	1	1	1	1	1	1	1	1	1	1
livF	livF	hypothetical protein;Leucine/isoleucine/valine transporter ATP-binding subunit;high-affinity branched-chain amino acid ABC transporter ATP-binding protein LivF	568	569	1.00176	1	4385	303	714	712.824	1	1	1	1	1	1	1	1	1	1	1	1	1	1	1	1	1	1	1	1	1	1	1	1	1	1	1	1	1	1	1	1	1	1	1	1	1	1	1
ptsJ	ptsJ	GntR family transcriptional regulator;aminotransferase class I/II-fold pyridoxal phosphate-dependent enzyme;transcriptional regulator PtsJ	568	569	1.00176	1	4384	528	1293	1290.71	1	1	1	1	1	1	1	1	1	1	1	1	1	1	1	1	1	1	1	1	1	1	1	1	1	1	1	1	1	1	1	1	1	1	1	1	1	1	1
purK	purK	5-(carboxyamino)imidazole ribonucleotide synthase;N5-carboxyaminoimidazole ribonucleotide synthase;Phosphoribosylaminoimidazole carboxylase ATPase subunit	568	570	1.00352	1	4381	246	1488	1064.62	1	1	1	1	1	1	1	1	1	1	1	1	1	1	1	1	1	1	1	1	1	1	1	1	1	1	1	1	1	1	1	1	1	1	1	1	1	1	1
fimY	fimY	hypothetical protein;fimbria biosynthesis regulator FimY	568	568	1	1	4380	411	723	722.451	1	1	1	1	1	1	1	1	1	1	1	1	1	1	1	1	1	1	1	1	1	1	1	1	1	1	1	1	1	1	1	1	1	1	1	1	1	1	1
rbbA	rbbA	ribosome-associated ATPase/putative transporter RbbA;ATP-binding cassette domain-containing protein	568	582	1.02465	1	4379	507	2757	2690.39	1	1	1	1	1	1	1	1	1	1	1	1	1	1	1	1	1	1	1	1	1	1	1	1	1	1	1	1	1	1	1	1	1	1	1	1	1	1	1
group_1580	ubiE	SAM-dependent methyltransferase;hypothetical protein;S-adenosyl-L-methionine-dependent methyltransferase	568	574	1.01056	1	4377	108	732	722.373	1	1	1	1	1	1	1	1	1	1	1	1	1	1	1	1	1	1	1	1	1	1	1	1	1	1	1	1	1	1	1	1	1	1	1	1	1	1	1
cysH	cysH	phosphoadenosine phosphosulfate reductase;Phosphoadenosine 5'-phosphosulfate reductase	568	568	1	1	4375	516	735	734.614	1	1	1	1	1	1	1	1	1	1	1	1	1	1	1	1	1	1	1	1	1	1	1	1	1	1	1	1	1	1	1	1	1	1	1	1	1	1	1
nnr	nnr	NAD(P)H-hydrate epimerase;bifunctional ADP-dependent NAD(P)H-hydrate dehydratase/NAD(P)H-hydrate epimerase	568	570	1.00352	1	4374	501	1545	1539.43	1	1	1	1	1	1	1	1	1	1	1	1	1	1	1	1	1	1	1	1	1	1	1	1	1	1	1	1	1	1	1	1	1	1	1	1	1	1	1
sufD	sufD	FeS cluster assembly protein sufD;Fe-S cluster assembly protein SufD	568	569	1.00176	1	4373	486	1272	1269.81	1	1	1	1	1	1	1	1	1	1	1	1	1	1	1	1	1	1	1	1	1	1	1	1	1	1	1	1	1	1	1	1	1	1	1	1	1	1	1
group_1578	uhpC	D-glucarate permease;MFS transporter;Sugar phosphate permease	568	574	1.01056	1	4371	408	1332	1317.54	1	1	1	1	1	1	1	1	1	1	1	1	1	1	1	1	1	1	1	1	1	1	1	1	1	1	1	1	1	1	1	1	1	1	1	1	1	1	1
fixC	fixC	FAD-dependent oxidoreductase;putative electron transfer flavoprotein-quinone oxidoreductase YdiS;Dehydrogenase (flavoprotein)	568	569	1.00176	1	4368	144	1575	1285.23	1	1	1	1	1	1	1	1	1	1	1	1	1	1	1	1	1	1	1	1	1	1	1	1	1	1	1	1	1	1	1	1	1	1	1	1	1	1	1
group_1575	fimD	hypothetical protein;fimbrial outer membrane usher protein	568	569	1.00176	1	4367	762	2577	2572.48	1	1	1	1	1	1	1	1	1	1	1	1	1	1	1	1	1	1	1	1	1	1	1	1	1	1	1	1	1	1	1	1	1	1	1	1	1	1	1
group_1574		Putative PFL-like glycyl radical enzyme;DUF3029 domain-containing protein;Glycine radical enzyme YjjI family	568	1041	1.83275	1	4366	162	1581	756.611	1	1	1	1	1	1	1	1	1	1	1	1	1	1	1	1	1	1	1	1	1	1	1	1	1	1	1	1	1	1	1	1	1	1	1	1	1	1	1
group_1573	sgcC	PTS system protein galactitol-specific IIC component;Galactitol permease IIC component;Phosphotransferase system galactitol-specific IIC component	568	569	1.00176	1	4365	390	1374	1371.52	1	1	1	1	1	1	1	1	1	1	1	1	1	1	1	1	1	1	1	1	1	1	1	1	1	1	1	1	1	1	1	1	1	1	1	1	1	1	1
lpoA	lpoA	LppC putative lipoprotein;Outer membrane lipoprotein LpoA binds and activates PBP1a	568	569	1.00176	1	4364	693	2043	2038.81	1	1	1	1	1	1	1	1	1	1	1	1	1	1	1	1	1	1	1	1	1	1	1	1	1	1	1	1	1	1	1	1	1	1	1	1	1	1	1
flgE	flgE	Flagellar basal body protein;Flagellar hook protein FlgE;flagellar hook protein FlgE	568	569	1.00176	1	4363	282	1212	1209.86	1	1	1	1	1	1	1	1	1	1	1	1	1	1	1	1	1	1	1	1	1	1	1	1	1	1	1	1	1	1	1	1	1	1	1	1	1	1	1
cobB~~~cbiA	cobB;cbiA	Cobyrinic acid ac-diamide synthase;cobyrinate ac-diamide synthase;Cobyrinic acid AC-diamide synthase	568	584	1.02817	1	4361	153	1380	1341.63	1	1	1	1	1	1	1	1	1	1	1	1	1	1	1	1	1	1	1	1	1	1	1	1	1	1	1	1	1	1	1	1	1	1	1	1	1	1	1
fhuE	fhuE	ferric-rhodotorulic acid/ferric-coprogen receptor FhuE;Ferric-rhodotorulic acid outer membrane transporter	568	569	1.00176	1	4360	894	2190	2171	1	1	1	1	1	1	1	1	1	1	1	1	1	1	1	1	1	1	1	1	1	1	1	1	1	1	1	1	1	1	1	1	1	1	1	1	1	1	1
btuF	btuF	Vitamin B12 ABC transporter B12-binding component BtuF;Vitamin B12-binding protein;vitamin B12 ABC transporter substrate-binding protein BtuF	568	569	1.00176	1	4359	279	801	799.534	1	1	1	1	1	1	1	1	1	1	1	1	1	1	1	1	1	1	1	1	1	1	1	1	1	1	1	1	1	1	1	1	1	1	1	1	1	1	1
group_1572	sucD	acyl-CoA synthetase FdrA;hypothetical protein;Succinyl-CoA synthetase alpha subunit	568	569	1.00176	1	4358	312	1665	1661.97	1	1	1	1	1	1	1	1	1	1	1	1	1	1	1	1	1	1	1	1	1	1	1	1	1	1	1	1	1	1	1	1	1	1	1	1	1	1	1
rfaL	rfaL	O-antigen ligase RfaL;Oligosaccharide repeat unit polymerase Wzy O-antigen ligase	568	571	1.00528	1	4357	324	1215	1202.98	1	1	1	1	1	1	1	1	1	1	1	1	1	1	1	1	1	1	1	1	1	1	1	1	1	1	1	1	1	1	1	1	1	1	1	1	1	1	1
metE	metE	5-methyltetrahydropteroyltriglutamate--homocysteine S-methyltransferase;5-methyltetrahydropteroyltriglutamate/homocysteine S-methyltransferase	568	569	1.00176	1	4355	729	2265	2260.78	1	1	1	1	1	1	1	1	1	1	1	1	1	1	1	1	1	1	1	1	1	1	1	1	1	1	1	1	1	1	1	1	1	1	1	1	1	1	1
malT	malT	LuxR C-terminal-related transcriptional regulator;HTH-type transcriptional regulator MalT	568	572	1.00704	1	4353	579	2706	2685.96	1	1	1	1	1	1	1	1	1	1	1	1	1	1	1	1	1	1	1	1	1	1	1	1	1	1	1	1	1	1	1	1	1	1	1	1	1	1	1
group_1570		ion transporter;Ion transport protein;Ion-trans domain-containing protein	568	571	1.00528	1	4352	369	837	832.492	1	1	1	1	1	1	1	1	1	1	1	1	1	1	1	1	1	1	1	1	1	1	1	1	1	1	1	1	1	1	1	1	1	1	1	1	1	1	1
group_1569	manX	PTS sugar transporter subunit IIB;PTS mannose transporter subunit IIAB;PTS system mannose-specific IIA component / PTS system mannose-specific IIB component;mannose/fructose/sorbose PTS transporter subunit IIA;Mannose-specific PTS system EIIAB component	568	573	1.0088	1	4351	135	969	960.393	1	1	1	1	1	1	1	1	1	1	1	1	1	1	1	1	1	1	1	1	1	1	1	1	1	1	1	1	1	1	1	1	1	1	1	1	1	1	1
nadC	nadC	carboxylating nicotinate-nucleotide diphosphorylase	568	568	1	1	4350	894	894	894	1	1	1	1	1	1	1	1	1	1	1	1	1	1	1	1	1	1	1	1	1	1	1	1	1	1	1	1	1	1	1	1	1	1	1	1	1	1	1
paaJ	paaJ	Putative acyltransferase;Acetyl-CoA acetyltransferase	568	569	1.00176	1	4348	534	1179	1177.04	1	1	1	1	1	1	1	1	1	1	1	1	1	1	1	1	1	1	1	1	1	1	1	1	1	1	1	1	1	1	1	1	1	1	1	1	1	1	1
gss	gss	hypothetical protein;bifunctional glutathionylspermidine amidase/synthase	568	569	1.00176	1	4347	117	1857	1851.33	1	1	1	1	1	1	1	1	1	1	1	1	1	1	1	1	1	1	1	1	1	1	1	1	1	1	1	1	1	1	1	1	1	1	1	1	1	1	1
trpD	trpD	bifunctional anthranilate synthase glutamate amidotransferase component TrpG/anthranilate phosphoribosyltransferase TrpD;Anthranilate synthase component II anthranilate phosphoribosyltransferase	568	570	1.00352	1	4346	432	1596	1590.48	1	1	1	1	1	1	1	1	1	1	1	1	1	1	1	1	1	1	1	1	1	1	1	1	1	1	1	1	1	1	1	1	1	1	1	1	1	1	1
glxR	glxR	2-hydroxy-3-oxopropionate reductase	568	570	1.00352	1	4345	267	879	875.895	1	1	1	1	1	1	1	1	1	1	1	1	1	1	1	1	1	1	1	1	1	1	1	1	1	1	1	1	1	1	1	1	1	1	1	1	1	1	1
cotJC	cotJC	Mn-containing catalase (includes spore coat protein CotJC);Manganese catalase	568	569	1.00176	1	4344	135	879	877.387	1	1	1	1	1	1	1	1	1	1	1	1	1	1	1	1	1	1	1	1	1	1	1	1	1	1	1	1	1	1	1	1	1	1	1	1	1	1	1
hybA1	hybA1	Glycosyl hydrolase;Ybl149;Beta-L-arabinofuranosidase GH127 family	568	570	1.00352	1	4343	465	1956	1949.08	1	1	1	1	1	1	1	1	1	1	1	1	1	1	1	1	1	1	1	1	1	1	1	1	1	1	1	1	1	1	1	1	1	1	1	1	1	1	1
cheA	cheA	HPt domain-containing protein;chemotaxis protein CheA	568	570	1.00352	1	4342	372	2016	2008.84	1	1	1	1	1	1	1	1	1	1	1	1	1	1	1	1	1	1	1	1	1	1	1	1	1	1	1	1	1	1	1	1	1	1	1	1	1	1	1
argP	argP	Chromosome initiation inhibitor;DNA-binding transcriptional regulator ArgP	568	569	1.00176	1	4341	180	894	892.434	1	1	1	1	1	1	1	1	1	1	1	1	1	1	1	1	1	1	1	1	1	1	1	1	1	1	1	1	1	1	1	1	1	1	1	1	1	1	1
hemF	hemF	coproporphyrinogen III oxidase;oxygen-dependent coproporphyrinogen oxidase	568	574	1.01056	1	4340	372	900	889.526	1	1	1	1	1	1	1	1	1	1	1	1	1	1	1	1	1	1	1	1	1	1	1	1	1	1	1	1	1	1	1	1	1	1	1	1	1	1	1
lnt	lnt	apolipoprotein N-acyltransferase	568	569	1.00176	1	4338	525	1590	1586.98	1	1	1	1	1	1	1	1	1	1	1	1	1	1	1	1	1	1	1	1	1	1	1	1	1	1	1	1	1	1	1	1	1	1	1	1	1	1	1
rdgC	rdgC	Recombination-associated protein RdgC;recombination-associated protein RdgC	568	569	1.00176	1	4337	297	912	910.497	1	1	1	1	1	1	1	1	1	1	1	1	1	1	1	1	1	1	1	1	1	1	1	1	1	1	1	1	1	1	1	1	1	1	1	1	1	1	1
group_1567	gsiA	Putative ABC transporter ATP-bindingprotein;glutathione ABC transporter ATP-binding protein GsiA	568	569	1.00176	1	4336	423	1872	1868.66	1	1	1	1	1	1	1	1	1	1	1	1	1	1	1	1	1	1	1	1	1	1	1	1	1	1	1	1	1	1	1	1	1	1	1	1	1	1	1
group_1563	araJ	putative arabinose efflux permease AraJ MFS family;MFS transporter permease	568	569	1.00176	1	4332	246	1428	1425.32	1	1	1	1	1	1	1	1	1	1	1	1	1	1	1	1	1	1	1	1	1	1	1	1	1	1	1	1	1	1	1	1	1	1	1	1	1	1	1
fumA~~~fumB	fumA;fumB	FumA C-terminus/TtdB family hydratase beta subunit;hypothetical protein;class I fumarate hydratase FumA;class I fumarate hydratase	568	569	1.00176	1	4331	441	1647	1641.95	1	1	1	1	1	1	1	1	1	1	1	1	1	1	1	1	1	1	1	1	1	1	1	1	1	1	1	1	1	1	1	1	1	1	1	1	1	1	1
rstB	rstB	Two component sensor kinase;Histidine kinase;two-component system sensor histidine kinase RstB	568	569	1.00176	1	4330	597	1302	1299.61	1	1	1	1	1	1	1	1	1	1	1	1	1	1	1	1	1	1	1	1	1	1	1	1	1	1	1	1	1	1	1	1	1	1	1	1	1	1	1
dgaE	dgaE	D-glucosaminate-6-phosphate ammonia lyase;L-seryl-tRNA selenium transferase	568	570	1.00352	1	4329	141	1110	1105.56	1	1	1	1	1	1	1	1	1	1	1	1	1	1	1	1	1	1	1	1	1	1	1	1	1	1	1	1	1	1	1	1	1	1	1	1	1	1	1
msbA~~~iroC	msbA;iroC	ATP-binding protein;lipid A export permease/ATP-binding protein MsbA;hypothetical protein;salmochelin/enterobactin export ABC transporter IroC	568	569	1.00176	1	4327	474	3654	3642.92	1	1	1	1	1	1	1	1	1	1	1	1	1	1	1	1	1	1	1	1	1	1	1	1	1	1	1	1	1	1	1	1	1	1	1	1	1	1	1
group_1561	melB	MFS transporter;sugar transporter;Symporter;Na+/melibiose symporter or related transporter	568	572	1.00704	1	4324	198	1407	1396.68	1	1	1	1	1	1	1	1	1	1	1	1	1	1	1	1	1	1	1	1	1	1	1	1	1	1	1	1	1	1	1	1	1	1	1	1	1	1	1
nUC1	nUC1	hypothetical protein;DNA/RNA non-specific endonuclease;Endonuclease	568	569	1.00176	1	4323	264	855	853.25	1	1	1	1	1	1	1	1	1	1	1	1	1	1	1	1	1	1	1	1	1	1	1	1	1	1	1	1	1	1	1	1	1	1	1	1	1	1	1
ssaO	ssaO	SPI-2 type III secretion system apparatus protein SsaO	568	568	1	1	4320	378	432	379.048	1	1	1	1	1	1	1	1	1	1	1	1	1	1	1	1	1	1	1	1	1	1	1	1	1	1	1	1	1	1	1	1	1	1	1	1	1	1	1
group_1559	rbsK	ribokinase;Regulatory protein;Sugar or nucleoside kinase ribokinase family	568	570	1.00352	1	4318	234	1215	1210.68	1	1	1	1	1	1	1	1	1	1	1	1	1	1	1	1	1	1	1	1	1	1	1	1	1	1	1	1	1	1	1	1	1	1	1	1	1	1	1
fliZ	fliZ	flagella biosynthesis regulatory protein FliZ;FliZ protein;hypothetical protein	568	570	1.00352	1	4316	153	552	549.926	1	1	1	1	1	1	1	1	1	1	1	1	1	1	1	1	1	1	1	1	1	1	1	1	1	1	1	1	1	1	1	1	1	1	1	1	1	1	1
tcyJ	tcyJ	Cystine transporter subunit;cystine ABC transporter substrate-binding protein;Cystine ABC transporter	568	601	1.0581	1	4315	189	801	753.933	1	1	1	1	1	1	1	1	1	1	1	1	1	1	1	1	1	1	1	1	1	1	1	1	1	1	1	1	1	1	1	1	1	1	1	1	1	1	1
yqjG	yqjG	Glutathione S-transferase C-terminal domain protein;Glutathionyl-hydroquinone reductase YqjG;Glutathione S-transferase omega	568	570	1.00352	1	4314	354	987	983.063	1	1	1	1	1	1	1	1	1	1	1	1	1	1	1	1	1	1	1	1	1	1	1	1	1	1	1	1	1	1	1	1	1	1	1	1	1	1	1
group_1558	fepC	iron-enterobactin ABC transporter ATP-binding protein;hypothetical protein;ferrienterobactin ABC transporter ATPase	568	569	1.00176	1	4313	159	795	793.587	1	1	1	1	1	1	1	1	1	1	1	1	1	1	1	1	1	1	1	1	1	1	1	1	1	1	1	1	1	1	1	1	1	1	1	1	1	1	1
fliG	fliG	Flagellar motor switch protein FliG;flagellar motor switch protein FliG	568	568	1	1	4311	924	996	995.873	1	1	1	1	1	1	1	1	1	1	1	1	1	1	1	1	1	1	1	1	1	1	1	1	1	1	1	1	1	1	1	1	1	1	1	1	1	1	1
trpS	trpS	Tryptophanyl-tRNA synthetase;tryptophan--tRNA ligase	568	569	1.00176	1	4310	102	1005	1003.25	1	1	1	1	1	1	1	1	1	1	1	1	1	1	1	1	1	1	1	1	1	1	1	1	1	1	1	1	1	1	1	1	1	1	1	1	1	1	1
ahr	ahr	Zinc-type alcohol dehydrogenase;Aldehyde reductase Ahr	568	568	1	1	4309	591	1020	1019.24	1	1	1	1	1	1	1	1	1	1	1	1	1	1	1	1	1	1	1	1	1	1	1	1	1	1	1	1	1	1	1	1	1	1	1	1	1	1	1
nagZ	nagZ	beta-N-acetylhexosaminidase;Glycosyl hydrolase	568	570	1.00352	1	4308	309	1026	1022.4	1	1	1	1	1	1	1	1	1	1	1	1	1	1	1	1	1	1	1	1	1	1	1	1	1	1	1	1	1	1	1	1	1	1	1	1	1	1	1
ycfP	ycfP	hypothetical protein;alpha/beta hydrolase YcfP;putative esterase	568	569	1.00176	1	4307	255	543	541.93	1	1	1	1	1	1	1	1	1	1	1	1	1	1	1	1	1	1	1	1	1	1	1	1	1	1	1	1	1	1	1	1	1	1	1	1	1	1	1
tqsA	tqsA	Transporter;pheromone autoinducer 2 transporter;putative PurR-regulated permease PerM	568	569	1.00176	1	4306	105	1035	1033.12	1	1	1	1	1	1	1	1	1	1	1	1	1	1	1	1	1	1	1	1	1	1	1	1	1	1	1	1	1	1	1	1	1	1	1	1	1	1	1
potD	potD	spermidine/putrescine ABC transporter substrate-binding protein PotD	568	568	1	1	4305	942	1047	1046.82	1	1	1	1	1	1	1	1	1	1	1	1	1	1	1	1	1	1	1	1	1	1	1	1	1	1	1	1	1	1	1	1	1	1	1	1	1	1	1
group_1556	tar	Methyl accepting chemotaxis protein II aspartate sensor-receptor;methyl-accepting chemotaxis protein;methyl-accepting chemotaxis protein II	568	572	1.00704	1	4304	462	1662	1650.77	1	1	1	1	1	1	1	1	1	1	1	1	1	1	1	1	1	1	1	1	1	1	1	1	1	1	1	1	1	1	1	1	1	1	1	1	1	1	1
cheB	cheB	protein-glutamate methylesterase/protein glutamine deamidase	568	568	1	1	4303	1050	1143	1050.16	1	1	1	1	1	1	1	1	1	1	1	1	1	1	1	1	1	1	1	1	1	1	1	1	1	1	1	1	1	1	1	1	1	1	1	1	1	1	1
group_1555	ttdA	fumarate hydratase;hypothetical protein	568	569	1.00176	1	4302	189	870	842.8	1	1	1	1	1	1	1	1	1	1	1	1	1	1	1	1	1	1	1	1	1	1	1	1	1	1	1	1	1	1	1	1	1	1	1	1	1	1	1
fumA	fumA	Hydro-lyase tartrate/fumarate family beta subunit;fumarate hydratase;Tartrate dehydratase beta subunit/Fumarate hydratase class I C-terminal domain	568	569	1.00176	1	4301	123	546	544.824	1	1	1	1	1	1	1	1	1	1	1	1	1	1	1	1	1	1	1	1	1	1	1	1	1	1	1	1	1	1	1	1	1	1	1	1	1	1	1
cbiG	cbiG	Cobalamin biosynthesis protein CbiG;cobalt-precorrin 5A hydrolase	568	569	1.00176	1	4300	492	1056	1054.14	1	1	1	1	1	1	1	1	1	1	1	1	1	1	1	1	1	1	1	1	1	1	1	1	1	1	1	1	1	1	1	1	1	1	1	1	1	1	1
glpQ	glpQ	Glycerophosphodiester phosphodiesterase;glycerophosphodiester phosphodiesterase	568	569	1.00176	1	4297	282	1071	1069.1	1	1	1	1	1	1	1	1	1	1	1	1	1	1	1	1	1	1	1	1	1	1	1	1	1	1	1	1	1	1	1	1	1	1	1	1	1	1	1
damX	damX	hypothetical protein;cell division protein DamX	568	570	1.00352	1	4295	195	1278	1270.4	1	1	1	1	1	1	1	1	1	1	1	1	1	1	1	1	1	1	1	1	1	1	1	1	1	1	1	1	1	1	1	1	1	1	1	1	1	1	1
mnmH	mnmH	tRNA 2-selenouridine synthase;tRNA 2-selenouridine(34) synthase MnmH	568	569	1.00176	1	4294	411	1095	1092.96	1	1	1	1	1	1	1	1	1	1	1	1	1	1	1	1	1	1	1	1	1	1	1	1	1	1	1	1	1	1	1	1	1	1	1	1	1	1	1
adrA	adrA	diguanylate cyclase AdrA;Putative signal transduction protein	568	569	1.00176	1	4293	288	1113	1110.95	1	1	1	1	1	1	1	1	1	1	1	1	1	1	1	1	1	1	1	1	1	1	1	1	1	1	1	1	1	1	1	1	1	1	1	1	1	1	1
group_1554	ompC	porin;Outer membrane porin OmpC/OmpF/PhoE	568	569	1.00176	1	4292	297	1134	1131.94	1	1	1	1	1	1	1	1	1	1	1	1	1	1	1	1	1	1	1	1	1	1	1	1	1	1	1	1	1	1	1	1	1	1	1	1	1	1	1
group_1553	mscS	Inner membrane protein;mechanosensitive ion channel protein MscS;Small-conductance mechanosensitive channel	568	569	1.00176	1	4290	102	1134	1131.97	1	1	1	1	1	1	1	1	1	1	1	1	1	1	1	1	1	1	1	1	1	1	1	1	1	1	1	1	1	1	1	1	1	1	1	1	1	1	1
group_1552	asmA	outer membrane assembly protein AsmA;AsmA protein	568	569	1.00176	1	4289	129	1857	1853.74	1	1	1	1	1	1	1	1	1	1	1	1	1	1	1	1	1	1	1	1	1	1	1	1	1	1	1	1	1	1	1	1	1	1	1	1	1	1	1
tlyC	tlyC	hypothetical protein;Integral membrane protein TerC family;Mg2+ and Co2+ transporter CorB;Hemolysin-related protein contains CBS domains UPF0053 family	568	570	1.00352	1	4288	228	1581	1573.83	1	1	1	1	1	1	1	1	1	1	1	1	1	1	1	1	1	1	1	1	1	1	1	1	1	1	1	1	1	1	1	1	1	1	1	1	1	1	1
arnA	arnA	Polymyxin resistance protein ArnA_DH;bifunctional UDP-4-amino-4-deoxy-L-arabinose formyltransferase/UDP-glucuronic acid oxidase ArnA	568	569	1.00176	1	4287	264	1983	1979.41	1	1	1	1	1	1	1	1	1	1	1	1	1	1	1	1	1	1	1	1	1	1	1	1	1	1	1	1	1	1	1	1	1	1	1	1	1	1	1
gcvR	gcvR	glycine cleavage system transcriptional repressor;Glycine cleavage system transcriptional antiactivator GcvR	568	569	1.00176	1	4286	300	573	572.046	1	1	1	1	1	1	1	1	1	1	1	1	1	1	1	1	1	1	1	1	1	1	1	1	1	1	1	1	1	1	1	1	1	1	1	1	1	1	1
lpxB	lpxB	Lipid-A-disaccharide synthase;lipid-A-disaccharide synthase	568	569	1.00176	1	4285	357	1149	1146.99	1	1	1	1	1	1	1	1	1	1	1	1	1	1	1	1	1	1	1	1	1	1	1	1	1	1	1	1	1	1	1	1	1	1	1	1	1	1	1
dnaE	dnaE	DNA polymerase III subunit alpha	568	569	1.00176	1	4284	1125	3501	3494.85	1	1	1	1	1	1	1	1	1	1	1	1	1	1	1	1	1	1	1	1	1	1	1	1	1	1	1	1	1	1	1	1	1	1	1	1	1	1	1
group_1549	citT	DASS family sodium-coupled anion symporter;Putative cation transporter;anion permease;Di- and tricarboxylate antiporter	568	569	1.00176	1	4281	456	1485	1452.59	1	1	1	1	1	1	1	1	1	1	1	1	1	1	1	1	1	1	1	1	1	1	1	1	1	1	1	1	1	1	1	1	1	1	1	1	1	1	1
yeaD	yeaD	Aldose 1-epimerase family protein YeaD;Putative glucose-6-phosphate 1-epimerase	568	569	1.00176	1	4278	231	1059	883.761	1	1	1	1	1	1	1	1	1	1	1	1	1	1	1	1	1	1	1	1	1	1	1	1	1	1	1	1	1	1	1	1	1	1	1	1	1	1	1
group_1547	aRA1	Oxidoreductase;Aldo/keto reductase related to diketogulonate reductase	568	569	1.00176	1	4277	285	849	847.434	1	1	1	1	1	1	1	1	1	1	1	1	1	1	1	1	1	1	1	1	1	1	1	1	1	1	1	1	1	1	1	1	1	1	1	1	1	1	1
aas	aas	2-acylglycerophosphoethanolamine acyltransferase;bifunctional acyl-ACP--phospholipid O-acyltransferase/long-chain-fatty-acid--ACP ligase	568	569	1.00176	1	4275	546	2160	2156.12	1	1	1	1	1	1	1	1	1	1	1	1	1	1	1	1	1	1	1	1	1	1	1	1	1	1	1	1	1	1	1	1	1	1	1	1	1	1	1
group_1544	fucP	Transport protein/putative regulator;MFS transporter;Fucose permease	568	569	1.00176	1	4273	195	1212	1209.4	1	1	1	1	1	1	1	1	1	1	1	1	1	1	1	1	1	1	1	1	1	1	1	1	1	1	1	1	1	1	1	1	1	1	1	1	1	1	1
group_1543	cof	HAD hydrolase family protein;Hydroxymethylpyrimidine pyrophosphatase and other HAD family phosphatases	568	569	1.00176	1	4272	387	816	814.613	1	1	1	1	1	1	1	1	1	1	1	1	1	1	1	1	1	1	1	1	1	1	1	1	1	1	1	1	1	1	1	1	1	1	1	1	1	1	1
ybjL	ybjL;	aspartate:alanine antiporter;Putative transport protein with two RCK domains;Asp-Al-Ex domain-containing protein	568	570	1.00352	1	4271	279	1686	1679.9	1	1	1	1	1	1	1	1	1	1	1	1	1	1	1	1	1	1	1	1	1	1	1	1	1	1	1	1	1	1	1	1	1	1	1	1	1	1	1
eutA	eutA	ethanolamine ammonia-lyase reactivating factor EutA;Reactivating factor for ethanolamine ammonia lyase	568	569	1.00176	1	4269	504	1404	1401.47	1	1	1	1	1	1	1	1	1	1	1	1	1	1	1	1	1	1	1	1	1	1	1	1	1	1	1	1	1	1	1	1	1	1	1	1	1	1	1
aspB	aspB	Aspartate aminotransferase;Methionine aminotransferase;Aspartate/methionine/tyrosine aminotransferase	568	569	1.00176	1	4268	264	1161	1159.05	1	1	1	1	1	1	1	1	1	1	1	1	1	1	1	1	1	1	1	1	1	1	1	1	1	1	1	1	1	1	1	1	1	1	1	1	1	1	1
alaC	alaC	LL-diaminopimelate aminotransferase;alanine transaminase;aminotransferase class I/II-fold pyridoxal phosphate-dependent enzyme	568	569	1.00176	1	4267	519	1239	1236.66	1	1	1	1	1	1	1	1	1	1	1	1	1	1	1	1	1	1	1	1	1	1	1	1	1	1	1	1	1	1	1	1	1	1	1	1	1	1	1
mntH	mntH	Nramp family divalent metal transporter;Mn(2+) uptake NRAMP transporter MntH	568	568	1	1	4266	675	1242	1241	1	1	1	1	1	1	1	1	1	1	1	1	1	1	1	1	1	1	1	1	1	1	1	1	1	1	1	1	1	1	1	1	1	1	1	1	1	1	1
group_1541	pepD	Aminoacyl-histidine dipeptidase;M20-dimer domain-containing protein;cytosol nonspecific dipeptidase	568	571	1.00528	1	4265	315	1458	1450.09	1	1	1	1	1	1	1	1	1	1	1	1	1	1	1	1	1	1	1	1	1	1	1	1	1	1	1	1	1	1	1	1	1	1	1	1	1	1	1
nagK	nagK	ROK family protein;N-acetylglucosamine kinase	568	570	1.00352	1	4264	273	912	908.716	1	1	1	1	1	1	1	1	1	1	1	1	1	1	1	1	1	1	1	1	1	1	1	1	1	1	1	1	1	1	1	1	1	1	1	1	1	1	1
group_1540	rocR	hypothetical protein;sigma-54-dependent transcriptional regulator;RocR-type transcriptional regulator contains PAS AAA-type ATPase and DNA-binding Fis domains	568	572	1.00704	1	4263	177	1929	1915.01	1	1	1	1	1	1	1	1	1	1	1	1	1	1	1	1	1	1	1	1	1	1	1	1	1	1	1	1	1	1	1	1	1	1	1	1	1	1	1
res	res	type III restriction-modification system endonuclease;VRR-NUC domain-containing protein	568	569	1.00176	1	4261	291	2973	2967.76	1	1	1	1	1	1	1	1	1	1	1	1	1	1	1	1	1	1	1	1	1	1	1	1	1	1	1	1	1	1	1	1	1	1	1	1	1	1	1
wzzE	wzzE	Lipopolysaccharide biosynthesis protein WzzE;ECA polysaccharide chain length modulation protein	568	569	1.00176	1	4259	303	1047	1045.27	1	1	1	1	1	1	1	1	1	1	1	1	1	1	1	1	1	1	1	1	1	1	1	1	1	1	1	1	1	1	1	1	1	1	1	1	1	1	1
wecB	wecB	hypothetical protein;UDP-N-acetylglucosamine 2-epimerase (non-hydrolyzing)	568	569	1.00176	1	4258	120	1086	1084.07	1	1	1	1	1	1	1	1	1	1	1	1	1	1	1	1	1	1	1	1	1	1	1	1	1	1	1	1	1	1	1	1	1	1	1	1	1	1	1
galR	galR	HTH-type transcriptional regulator GalR	568	568	1	1	4257	273	1029	1026.32	1	1	1	1	1	1	1	1	1	1	1	1	1	1	1	1	1	1	1	1	1	1	1	1	1	1	1	1	1	1	1	1	1	1	1	1	1	1	1
uup	uup	Heme ABC transporter ATP-binding protein;ABC-F family ATPase	568	592	1.04225	1	4256	456	1596	1531.46	1	1	1	1	1	1	1	1	1	1	1	1	1	1	1	1	1	1	1	1	1	1	1	1	1	1	1	1	1	1	1	1	1	1	1	1	1	1	1
gntP	gntP	SLC13 family permease;Putative permease;D-glycerate transporter;GntP family permease	568	571	1.00528	1	4255	294	1269	1262.53	1	1	1	1	1	1	1	1	1	1	1	1	1	1	1	1	1	1	1	1	1	1	1	1	1	1	1	1	1	1	1	1	1	1	1	1	1	1	1
hisS	hisS	histidine--tRNA ligase	568	569	1.00176	1	4254	357	1275	1272.81	1	1	1	1	1	1	1	1	1	1	1	1	1	1	1	1	1	1	1	1	1	1	1	1	1	1	1	1	1	1	1	1	1	1	1	1	1	1	1
group_1537	uraA;	uracil/xanthine transporter;Putative purine permease YbbY	568	570	1.00352	1	4252	93	1299	1294.52	1	1	1	1	1	1	1	1	1	1	1	1	1	1	1	1	1	1	1	1	1	1	1	1	1	1	1	1	1	1	1	1	1	1	1	1	1	1	1
group_1536		conjugal transfer protein TraF;conjugal transfer protein;Putative exported protein	568	572	1.00704	1	4251	252	1410	1301.99	1	1	1	1	1	1	1	1	1	1	1	1	1	1	1	1	1	1	1	1	1	1	1	1	1	1	1	1	1	1	1	1	1	1	1	1	1	1	1
group_1535	sgcC	Phosphotransferase system galactitol-specific IIC component	568	568	1	1	4250	1218	1314	1313.83	1	1	1	1	1	1	1	1	1	1	1	1	1	1	1	1	1	1	1	1	1	1	1	1	1	1	1	1	1	1	1	1	1	1	1	1	1	1	1
yhaM	yhaM	Putative inner membrane protein;Inner membrane protein;UPF0597 protein YhaM	568	570	1.00352	1	4249	405	1317	1312.43	1	1	1	1	1	1	1	1	1	1	1	1	1	1	1	1	1	1	1	1	1	1	1	1	1	1	1	1	1	1	1	1	1	1	1	1	1	1	1
phoB	phoB	Phosphate regulon transcriptional regulatory protein PhoB;phosphate response regulator transcription factor PhoB	568	568	1	1	4247	690	708	690.032	1	1	1	1	1	1	1	1	1	1	1	1	1	1	1	1	1	1	1	1	1	1	1	1	1	1	1	1	1	1	1	1	1	1	1	1	1	1	1
deoC	deoC	Deoxyribose-phosphate aldolase;deoxyribose-phosphate aldolase	568	569	1.00176	1	4246	300	780	778.745	1	1	1	1	1	1	1	1	1	1	1	1	1	1	1	1	1	1	1	1	1	1	1	1	1	1	1	1	1	1	1	1	1	1	1	1	1	1	1
group_1533	xylB	Xylulose kinase;xylulokinase	568	569	1.00176	1	4245	288	1455	1452.45	1	1	1	1	1	1	1	1	1	1	1	1	1	1	1	1	1	1	1	1	1	1	1	1	1	1	1	1	1	1	1	1	1	1	1	1	1	1	1
sfp	sfp	Putative phosphopantetheinyl transferase;Phosphopantetheinyl transferase	568	569	1.00176	1	4243	282	756	739.213	1	1	1	1	1	1	1	1	1	1	1	1	1	1	1	1	1	1	1	1	1	1	1	1	1	1	1	1	1	1	1	1	1	1	1	1	1	1	1
glrR~~~qseF	glrR;qseF	Two component system DNA-binding response regulator;two-component system response regulator GlrR;two-component system response regulator QseF/GlrR	568	569	1.00176	1	4242	618	1338	1335.57	1	1	1	1	1	1	1	1	1	1	1	1	1	1	1	1	1	1	1	1	1	1	1	1	1	1	1	1	1	1	1	1	1	1	1	1	1	1	1
uraH~~~hiuH	uraH;hiuH	hydroxyisourate hydrolase	568	568	1	1	4240	198	411	410.504	1	1	1	1	1	1	1	1	1	1	1	1	1	1	1	1	1	1	1	1	1	1	1	1	1	1	1	1	1	1	1	1	1	1	1	1	1	1	1
group_1532	eAL	EAL domain-containing protein;CSS-motif domain-containing protein;EAL domain c-di-GMP-specific phosphodiesterase class I (or its enzymatically inactive variant)	568	569	1.00176	1	4239	765	1602	1599.19	1	1	1	1	1	1	1	1	1	1	1	1	1	1	1	1	1	1	1	1	1	1	1	1	1	1	1	1	1	1	1	1	1	1	1	1	1	1	1
group_1531	sdaA	L-serine ammonia-lyase	568	569	1.00176	1	4238	642	1371	1368.58	1	1	1	1	1	1	1	1	1	1	1	1	1	1	1	1	1	1	1	1	1	1	1	1	1	1	1	1	1	1	1	1	1	1	1	1	1	1	1
cbiC	cbiC	Precorrin-8X methylmutase;Cobalt-precorrin-8X methylmutase;cobalt-precorrin-8 methylmutase	568	569	1.00176	1	4237	273	633	631.998	1	1	1	1	1	1	1	1	1	1	1	1	1	1	1	1	1	1	1	1	1	1	1	1	1	1	1	1	1	1	1	1	1	1	1	1	1	1	1
group_1530	mtlA	PTS family membrane transport system protein;Protein-N(pi)-phosphohistidine--D-mannitol phosphotransferase;Phosphotransferase system mannitol-specific IIBC component	568	569	1.00176	1	4236	282	1380	1376.68	1	1	1	1	1	1	1	1	1	1	1	1	1	1	1	1	1	1	1	1	1	1	1	1	1	1	1	1	1	1	1	1	1	1	1	1	1	1	1
group_1529		fimbria/pilus outer membrane usher protein;Pilin outer membrane usher protein SafC;Fimbria/pilus outer membrane usher protein	568	569	1.00176	1	4235	456	1383	1380.51	1	1	1	1	1	1	1	1	1	1	1	1	1	1	1	1	1	1	1	1	1	1	1	1	1	1	1	1	1	1	1	1	1	1	1	1	1	1	1
safB	safB	fimbria/pilus periplasmic chaperone;pili assembly chaperone SafB	568	568	1	1	4234	483	741	740.504	1	1	1	1	1	1	1	1	1	1	1	1	1	1	1	1	1	1	1	1	1	1	1	1	1	1	1	1	1	1	1	1	1	1	1	1	1	1	1
gspE	gspE	Protein transport protein HofB;type II secretion system protein GspE	568	569	1.00176	1	4233	522	1386	1383.24	1	1	1	1	1	1	1	1	1	1	1	1	1	1	1	1	1	1	1	1	1	1	1	1	1	1	1	1	1	1	1	1	1	1	1	1	1	1	1
group_1528		MotA/TolQ/ExbB proton channel family protein;Membrane protein;hypothetical protein;Putative integral membrane protein;MotA-ExbB domain-containing protein	568	582	1.02465	1	4231	312	1389	1350.55	1	1	1	1	1	1	1	1	1	1	1	1	1	1	1	1	1	1	1	1	1	1	1	1	1	1	1	1	1	1	1	1	1	1	1	1	1	1	1
cpsB	cpsB	mannose-1-phosphate guanyltransferase;mannose-1-phosphate guanylyltransferase ManC	568	568	1	1	4230	1362	1437	1436.87	1	1	1	1	1	1	1	1	1	1	1	1	1	1	1	1	1	1	1	1	1	1	1	1	1	1	1	1	1	1	1	1	1	1	1	1	1	1	1
group_1527		DUF1996 domain-containing protein	568	568	1	1	4229	1293	1401	1400.81	1	1	1	1	1	1	1	1	1	1	1	1	1	1	1	1	1	1	1	1	1	1	1	1	1	1	1	1	1	1	1	1	1	1	1	1	1	1	1
cycA	cycA	D-serine/D-alanine/glycine transporter;amino acid permease	568	576	1.01408	1	4228	171	1404	1383.11	1	1	1	1	1	1	1	1	1	1	1	1	1	1	1	1	1	1	1	1	1	1	1	1	1	1	1	1	1	1	1	1	1	1	1	1	1	1	1
rfbB	rfbB	dTDP-glucose 46-dehydratase	568	570	1.00352	1	4227	426	1086	1080.52	1	1	1	1	1	1	1	1	1	1	1	1	1	1	1	1	1	1	1	1	1	1	1	1	1	1	1	1	1	1	1	1	1	1	1	1	1	1	1
eutG	eutG	ethanolamine utilization ethanol dehydrogenase EutG;iron-containing alcohol dehydrogenase	568	569	1.00176	1	4225	408	1188	1185.33	1	1	1	1	1	1	1	1	1	1	1	1	1	1	1	1	1	1	1	1	1	1	1	1	1	1	1	1	1	1	1	1	1	1	1	1	1	1	1
group_1526	adhE	Ethanolamine utilization aldehyde dehydrogenase;Acyl-CoA reductase or other NAD-dependent aldehyde dehydrogenase	568	569	1.00176	1	4224	522	1404	1401.54	1	1	1	1	1	1	1	1	1	1	1	1	1	1	1	1	1	1	1	1	1	1	1	1	1	1	1	1	1	1	1	1	1	1	1	1	1	1	1
rfbP	rfbP	hypothetical protein;sugar transferase;Undecaprenyl-phosphate galactose phosphotransferase WbaP;undecaprenyl-phosphate galactose phosphotransferase;undecaprenyl-phosphate galactose phosphotransferase WbaP	568	572	1.00704	1	4223	126	1458	1379.76	1	1	1	1	1	1	1	1	1	1	1	1	1	1	1	1	1	1	1	1	1	1	1	1	1	1	1	1	1	1	1	1	1	1	1	1	1	1	1
gndA	gndA	hypothetical protein;NADP-dependent phosphogluconate dehydrogenase	568	568	1	1	4222	672	1407	1405.71	1	1	1	1	1	1	1	1	1	1	1	1	1	1	1	1	1	1	1	1	1	1	1	1	1	1	1	1	1	1	1	1	1	1	1	1	1	1	1
group_1525		hypothetical protein;Bacterial condensin subunit MukF	568	569	1.00176	1	4221	381	1413	1410.57	1	1	1	1	1	1	1	1	1	1	1	1	1	1	1	1	1	1	1	1	1	1	1	1	1	1	1	1	1	1	1	1	1	1	1	1	1	1	1
treB	treB	PTS system trehalose-specific EIIBC component;glucose PTS transporter subunit EIIB;PTS trehalose transporter subunit IIBC	568	569	1.00176	1	4220	582	1419	1416.42	1	1	1	1	1	1	1	1	1	1	1	1	1	1	1	1	1	1	1	1	1	1	1	1	1	1	1	1	1	1	1	1	1	1	1	1	1	1	1
mgtA	mgtA	Mg(2+) transport ATPase P-type;Magnesium-transporting ATPase P-type 1;magnesium-translocating P-type ATPase	568	570	1.00352	1	4219	231	2709	2699.25	1	1	1	1	1	1	1	1	1	1	1	1	1	1	1	1	1	1	1	1	1	1	1	1	1	1	1	1	1	1	1	1	1	1	1	1	1	1	1
kduI	kduI	5-dehydro-4-deoxy-D-glucuronate isomerase	568	599	1.05458	1	4218	234	837	793.062	1	1	1	1	1	1	1	1	1	1	1	1	1	1	1	1	1	1	1	1	1	1	1	1	1	1	1	1	1	1	1	1	1	1	1	1	1	1	1
codB	codB	Cytosine permease;cytosine permease	568	569	1.00176	1	4217	627	1356	1251.98	1	1	1	1	1	1	1	1	1	1	1	1	1	1	1	1	1	1	1	1	1	1	1	1	1	1	1	1	1	1	1	1	1	1	1	1	1	1	1
yhcG	yhcG	Putative cytoplasmic protein;DUF1016 domain-containing protein	568	569	1.00176	1	4216	375	1104	1102.04	1	1	1	1	1	1	1	1	1	1	1	1	1	1	1	1	1	1	1	1	1	1	1	1	1	1	1	1	1	1	1	1	1	1	1	1	1	1	1
otsA	otsA	Trehalose-6-phosphate synthase;trehalose-6-phosphate synthase;alphaalpha-trehalose-phosphate synthase	568	599	1.05458	1	4215	306	1425	1350.16	1	1	1	1	1	1	1	1	1	1	1	1	1	1	1	1	1	1	1	1	1	1	1	1	1	1	1	1	1	1	1	1	1	1	1	1	1	1	1
group_1522	ybjT	NAD dependent epimerase/dehydratase family protein;NAD(P)-dependent oxidoreductase;DUF2867 domain-containing protein	568	574	1.01056	1	4212	648	1434	1418.53	1	1	1	1	1	1	1	1	1	1	1	1	1	1	1	1	1	1	1	1	1	1	1	1	1	1	1	1	1	1	1	1	1	1	1	1	1	1	1
group_1521	alsT	Amino acid:proton symporter;hypothetical protein;amino acid carrier protein;amino acid:proton symporter;Putative alanine/glycine transport protein;Na+/alanine symporter	568	583	1.02641	1	4211	480	1434	1396.7	1	1	1	1	1	1	1	1	1	1	1	1	1	1	1	1	1	1	1	1	1	1	1	1	1	1	1	1	1	1	1	1	1	1	1	1	1	1	1
group_1520	nlpC	SH3 domain-containing protein;NLP/P60 domain-containing protein;Cell wall-associated hydrolase NlpC_P60 family	568	569	1.00176	1	4210	504	1434	1431.51	1	1	1	1	1	1	1	1	1	1	1	1	1	1	1	1	1	1	1	1	1	1	1	1	1	1	1	1	1	1	1	1	1	1	1	1	1	1	1
yecA	yecA	Putative metal-binding protein related to the C-terminal domain of SecA;YecA family protein;UPF0149 protein	568	576	1.01408	1	4209	204	666	656.771	1	1	1	1	1	1	1	1	1	1	1	1	1	1	1	1	1	1	1	1	1	1	1	1	1	1	1	1	1	1	1	1	1	1	1	1	1	1	1
araJ~~~iolT2	araJ;iolT2	hypothetical protein;MFS transporter;myo-inositol import MFS transporter IolT2	568	570	1.00352	1	4208	153	1437	1430.42	1	1	1	1	1	1	1	1	1	1	1	1	1	1	1	1	1	1	1	1	1	1	1	1	1	1	1	1	1	1	1	1	1	1	1	1	1	1	1
selO	selO	Selenoprotein O and cysteine-containing;YdiU family protein;protein adenylyltransferase SelO	568	570	1.00352	1	4207	525	1443	1438.02	1	1	1	1	1	1	1	1	1	1	1	1	1	1	1	1	1	1	1	1	1	1	1	1	1	1	1	1	1	1	1	1	1	1	1	1	1	1	1
trkH	trkH	Potassium transporter;Trk system potassium transporter TrkH;Trk system potassium uptake protein	568	569	1.00176	1	4206	423	1452	1449.45	1	1	1	1	1	1	1	1	1	1	1	1	1	1	1	1	1	1	1	1	1	1	1	1	1	1	1	1	1	1	1	1	1	1	1	1	1	1	1
rng	rng	hypothetical protein;ribonuclease G	568	568	1	1	4205	237	1470	1467.83	1	1	1	1	1	1	1	1	1	1	1	1	1	1	1	1	1	1	1	1	1	1	1	1	1	1	1	1	1	1	1	1	1	1	1	1	1	1	1
cyoB	cyoB	Cytochrome O ubiquinol oxidase subunit I;cytochrome o ubiquinol oxidase subunit I	568	569	1.00176	1	4203	156	1992	1988.15	1	1	1	1	1	1	1	1	1	1	1	1	1	1	1	1	1	1	1	1	1	1	1	1	1	1	1	1	1	1	1	1	1	1	1	1	1	1	1
group_1519	aslA	Sulfatase;Arylsulfatase A or related enzyme AlkP superfamily	568	569	1.00176	1	4202	267	1488	1484.55	1	1	1	1	1	1	1	1	1	1	1	1	1	1	1	1	1	1	1	1	1	1	1	1	1	1	1	1	1	1	1	1	1	1	1	1	1	1	1
yeaG	yeaG	PrkA family serine protein kinase;protein kinase YeaG	568	569	1.00176	1	4200	939	1935	1931.69	1	1	1	1	1	1	1	1	1	1	1	1	1	1	1	1	1	1	1	1	1	1	1	1	1	1	1	1	1	1	1	1	1	1	1	1	1	1	1
pdxY	pdxY	pyridoxal kinase PdxY;Pyridoxal kinase	568	569	1.00176	1	4198	237	861	859.308	1	1	1	1	1	1	1	1	1	1	1	1	1	1	1	1	1	1	1	1	1	1	1	1	1	1	1	1	1	1	1	1	1	1	1	1	1	1	1
group_1517	gstA	glutathione transferase GstA;Glutathionine S-transferase	568	569	1.00176	1	4197	189	606	604.903	1	1	1	1	1	1	1	1	1	1	1	1	1	1	1	1	1	1	1	1	1	1	1	1	1	1	1	1	1	1	1	1	1	1	1	1	1	1	1
group_1516		hypothetical protein;Aminotransferase class I/II-fold pyridoxal phosphate-dependent enzyme	568	569	1.00176	1	4196	123	396	395.172	1	1	1	1	1	1	1	1	1	1	1	1	1	1	1	1	1	1	1	1	1	1	1	1	1	1	1	1	1	1	1	1	1	1	1	1	1	1	1
dgt	dgt	Deoxyguanosinetriphosphate triphosphohydrolase;dGTPase	568	569	1.00176	1	4195	651	1518	1515.31	1	1	1	1	1	1	1	1	1	1	1	1	1	1	1	1	1	1	1	1	1	1	1	1	1	1	1	1	1	1	1	1	1	1	1	1	1	1	1
group_1515	citE	Citrate lyase subunit beta;CoA ester lyase;citrate (pro-3S)-lyase subunit beta	568	569	1.00176	1	4194	342	870	868.418	1	1	1	1	1	1	1	1	1	1	1	1	1	1	1	1	1	1	1	1	1	1	1	1	1	1	1	1	1	1	1	1	1	1	1	1	1	1	1
appC	appC	hypothetical protein;cytochrome bd-II oxidase subunit 1;Cytochrome bd-II oxidase subunit I;Cytochrome d terminal oxidase subunit 1	568	576	1.01408	1	4191	126	1545	1522.96	1	1	1	1	1	1	1	1	1	1	1	1	1	1	1	1	1	1	1	1	1	1	1	1	1	1	1	1	1	1	1	1	1	1	1	1	1	1	1
nhaB	nhaB	Regulator of intracellular pH Na+/H+ antiporter;Na(+)/H(+) antiporter NhaB	568	569	1.00176	1	4190	588	1551	1548.17	1	1	1	1	1	1	1	1	1	1	1	1	1	1	1	1	1	1	1	1	1	1	1	1	1	1	1	1	1	1	1	1	1	1	1	1	1	1	1
caiC	caiC	Crotonobetaine/carnitine-CoA ligase;crotonobetaine/carnitine-CoA ligase	568	569	1.00176	1	4189	579	1554	1551.28	1	1	1	1	1	1	1	1	1	1	1	1	1	1	1	1	1	1	1	1	1	1	1	1	1	1	1	1	1	1	1	1	1	1	1	1	1	1	1
gshA	gshA	glutamate--cysteine ligase	568	568	1	1	4188	1557	1701	1557.25	1	1	1	1	1	1	1	1	1	1	1	1	1	1	1	1	1	1	1	1	1	1	1	1	1	1	1	1	1	1	1	1	1	1	1	1	1	1	1
opgE	opgE	phosphoethanolamine transferase;Phosphoethanolamine transferase for periplasmic glucans OpgE AlkP superfamily	568	569	1.00176	1	4187	402	1581	1577.84	1	1	1	1	1	1	1	1	1	1	1	1	1	1	1	1	1	1	1	1	1	1	1	1	1	1	1	1	1	1	1	1	1	1	1	1	1	1	1
hsdR	hsdR	type I restriction-modification system endonuclease;Type I site-specific restriction endonuclease part of a restriction-modification system;EcoEI R protein C-terminal	568	571	1.00528	1	4186	270	3510	3491.32	1	1	1	1	1	1	1	1	1	1	1	1	1	1	1	1	1	1	1	1	1	1	1	1	1	1	1	1	1	1	1	1	1	1	1	1	1	1	1
aceB	aceB	malate synthase A;hypothetical protein;Malate synthase	568	569	1.00176	1	4185	108	1602	1599.05	1	1	1	1	1	1	1	1	1	1	1	1	1	1	1	1	1	1	1	1	1	1	1	1	1	1	1	1	1	1	1	1	1	1	1	1	1	1	1
sptP	sptP	Pathogenicity island 1 effector protein StpP;Protein-tyrosine-phosphatase;SPI-1 type III secretion system effector GTPase-activating protein SptP	568	573	1.0088	1	4184	747	1608	1593.51	1	1	1	1	1	1	1	1	1	1	1	1	1	1	1	1	1	1	1	1	1	1	1	1	1	1	1	1	1	1	1	1	1	1	1	1	1	1	1
oppC	oppC	Binding-protein-dependent transport system inner membrane protein;Oligopeptide transporter permease;oligopeptide ABC transporter permease OppC;Oligopeptide transport system permease OppC	568	570	1.00352	1	4183	261	909	905.711	1	1	1	1	1	1	1	1	1	1	1	1	1	1	1	1	1	1	1	1	1	1	1	1	1	1	1	1	1	1	1	1	1	1	1	1	1	1	1
oppB	oppB	ABC transporter permease subunit;hypothetical protein;oligopeptide ABC transporter permease OppB	568	569	1.00176	1	4182	309	1044	1022.99	1	1	1	1	1	1	1	1	1	1	1	1	1	1	1	1	1	1	1	1	1	1	1	1	1	1	1	1	1	1	1	1	1	1	1	1	1	1	1
group_1513	pqiB	intermembrane transport protein PqiB;Paraquat-inducible protein B	568	569	1.00176	1	4181	627	1641	1638.14	1	1	1	1	1	1	1	1	1	1	1	1	1	1	1	1	1	1	1	1	1	1	1	1	1	1	1	1	1	1	1	1	1	1	1	1	1	1	1
eco	eco	Ecotin;serine protease inhibitor ecotin	568	569	1.00176	1	4180	135	507	506.109	1	1	1	1	1	1	1	1	1	1	1	1	1	1	1	1	1	1	1	1	1	1	1	1	1	1	1	1	1	1	1	1	1	1	1	1	1	1	1
group_1512	melB	Melibiose:sodium symporter;melibiose:sodium transporter MelB	568	569	1.00176	1	4179	390	1431	1428.53	1	1	1	1	1	1	1	1	1	1	1	1	1	1	1	1	1	1	1	1	1	1	1	1	1	1	1	1	1	1	1	1	1	1	1	1	1	1	1
yjbF	yjbF	Lipoprotein;Group 4 capsule B-like protein;YjbF family lipoprotein	568	569	1.00176	1	4178	234	639	637.877	1	1	1	1	1	1	1	1	1	1	1	1	1	1	1	1	1	1	1	1	1	1	1	1	1	1	1	1	1	1	1	1	1	1	1	1	1	1	1
ipdC	ipdC	Decarboxylase;indolepyruvate decarboxylase	568	580	1.02113	1	4177	759	1722	1617.31	1	1	1	1	1	1	1	1	1	1	1	1	1	1	1	1	1	1	1	1	1	1	1	1	1	1	1	1	1	1	1	1	1	1	1	1	1	1	1
pdxI	pdxI	hypothetical protein;Ion-channel protein;L-glyceraldehyde 3-phosphate reductase;Pyridoxal reductase PdxI or related oxidoreductase aldo/keto reductase family	568	573	1.0088	1	4176	276	999	990.644	1	1	1	1	1	1	1	1	1	1	1	1	1	1	1	1	1	1	1	1	1	1	1	1	1	1	1	1	1	1	1	1	1	1	1	1	1	1	1
group_1511	citG	2-(5''-triphosphoribosyl)-3'-dephosphocoenzyme-A synthase;hypothetical protein;Triphosphoribosyl-dephospho-CoA synthetase	568	569	1.00176	1	4175	117	699	697.65	1	1	1	1	1	1	1	1	1	1	1	1	1	1	1	1	1	1	1	1	1	1	1	1	1	1	1	1	1	1	1	1	1	1	1	1	1	1	1
grpE	grpE	nucleotide exchange factor GrpE	568	568	1	1	4173	591	783	727.563	1	1	1	1	1	1	1	1	1	1	1	1	1	1	1	1	1	1	1	1	1	1	1	1	1	1	1	1	1	1	1	1	1	1	1	1	1	1	1
ubiF	ubiF	2-octaprenyl-3-methyl-6-methoxy-14-benzoquinol hydroxylase;FAD-dependent monooxygenase;3-demethoxyubiquinol 3-hydroxylase	568	569	1.00176	1	4172	453	1176	1173.94	1	1	1	1	1	1	1	1	1	1	1	1	1	1	1	1	1	1	1	1	1	1	1	1	1	1	1	1	1	1	1	1	1	1	1	1	1	1	1
hutG	hutG	Formimidoylglutamase;formimidoylglutamase	568	570	1.00352	1	4169	252	942	935.826	1	1	1	1	1	1	1	1	1	1	1	1	1	1	1	1	1	1	1	1	1	1	1	1	1	1	1	1	1	1	1	1	1	1	1	1	1	1	1
yicI	yicI	Glycosyl hydrolase;alpha-xylosidase	568	569	1.00176	1	4168	642	2319	2314.92	1	1	1	1	1	1	1	1	1	1	1	1	1	1	1	1	1	1	1	1	1	1	1	1	1	1	1	1	1	1	1	1	1	1	1	1	1	1	1
nhaP2	nhaP2	potassium/proton antiporter;Cell volume regulation protein A	568	570	1.00352	1	4167	243	1734	1727.82	1	1	1	1	1	1	1	1	1	1	1	1	1	1	1	1	1	1	1	1	1	1	1	1	1	1	1	1	1	1	1	1	1	1	1	1	1	1	1
lonB	lonB	Endopeptidase La;Protease;putative ATP-dependent protease	568	569	1.00176	1	4166	381	1761	1757.77	1	1	1	1	1	1	1	1	1	1	1	1	1	1	1	1	1	1	1	1	1	1	1	1	1	1	1	1	1	1	1	1	1	1	1	1	1	1	1
narX	narX	Nitrate/nitrite sensor protein;nitrate/nitrite two-component system sensor histidine kinase NarX	568	570	1.00352	1	4164	432	1797	1790.55	1	1	1	1	1	1	1	1	1	1	1	1	1	1	1	1	1	1	1	1	1	1	1	1	1	1	1	1	1	1	1	1	1	1	1	1	1	1	1
group_1509		hypothetical protein;DUF4288 domain-containing protein	568	568	1	1	4163	282	282	282	1	1	1	1	1	1	1	1	1	1	1	1	1	1	1	1	1	1	1	1	1	1	1	1	1	1	1	1	1	1	1	1	1	1	1	1	1	1	1
group_1508	dsbD	DUF255 domain-containing protein;Membrane protein suppressor for copper-sensitivity ScsB;Thiol:disulfide interchange protein DsbD	568	569	1.00176	1	4162	588	1887	1883.17	1	1	1	1	1	1	1	1	1	1	1	1	1	1	1	1	1	1	1	1	1	1	1	1	1	1	1	1	1	1	1	1	1	1	1	1	1	1	1
pnp	pnp	polyribonucleotide nucleotidyltransferase	568	569	1.00176	1	4161	819	2166	2162.14	1	1	1	1	1	1	1	1	1	1	1	1	1	1	1	1	1	1	1	1	1	1	1	1	1	1	1	1	1	1	1	1	1	1	1	1	1	1	1
rsxG	rsxG	Electron transport complex protein RnfG;electron transport complex subunit RsxG	568	569	1.00176	1	4160	261	621	619.339	1	1	1	1	1	1	1	1	1	1	1	1	1	1	1	1	1	1	1	1	1	1	1	1	1	1	1	1	1	1	1	1	1	1	1	1	1	1	1
acrB~~~acrD	acrB;acrD	Multidrug efflux pump subunit AcrB;Putative membrane protein;multidrug efflux RND transporter permease AcrD	568	569	1.00176	1	4157	417	3114	3108.43	1	1	1	1	1	1	1	1	1	1	1	1	1	1	1	1	1	1	1	1	1	1	1	1	1	1	1	1	1	1	1	1	1	1	1	1	1	1	1
group_1507		invasin;IAT-beta domain-containing protein	568	568	1	1	4156	1926	1983	1982.9	1	1	1	1	1	1	1	1	1	1	1	1	1	1	1	1	1	1	1	1	1	1	1	1	1	1	1	1	1	1	1	1	1	1	1	1	1	1	1
group_1505		Putative periplasmic protein;Periplasmic protein;DUF1176 domain-containing protein	568	573	1.0088	1	4154	195	1044	1034.45	1	1	1	1	1	1	1	1	1	1	1	1	1	1	1	1	1	1	1	1	1	1	1	1	1	1	1	1	1	1	1	1	1	1	1	1	1	1	1
group_1504	tkt	transketolase	568	568	1	1	4153	1959	2001	2000.93	1	1	1	1	1	1	1	1	1	1	1	1	1	1	1	1	1	1	1	1	1	1	1	1	1	1	1	1	1	1	1	1	1	1	1	1	1	1	1
pAS	pAS	Aerotaxis receptor protein;PAS domain-containing protein;methyl-accepting chemotaxis protein;PAS domain	568	570	1.00352	1	4151	534	1521	1515.79	1	1	1	1	1	1	1	1	1	1	1	1	1	1	1	1	1	1	1	1	1	1	1	1	1	1	1	1	1	1	1	1	1	1	1	1	1	1	1
argD~~~ygjG	argD;ygjG	Putrescine--2-oxoglutarate aminotransferase;putrescine aminotransferase	568	569	1.00176	1	4150	285	1380	1377.62	1	1	1	1	1	1	1	1	1	1	1	1	1	1	1	1	1	1	1	1	1	1	1	1	1	1	1	1	1	1	1	1	1	1	1	1	1	1	1
rhlB	rhlB	ATP-dependent RNA helicase RhlB;ATP-dependent RNA helicase	568	569	1.00176	1	4149	465	1266	1263.13	1	1	1	1	1	1	1	1	1	1	1	1	1	1	1	1	1	1	1	1	1	1	1	1	1	1	1	1	1	1	1	1	1	1	1	1	1	1	1
ppk1	ppk1	polyphosphate kinase 1;Polyphosphate kinase	568	569	1.00176	1	4148	342	2067	2063.36	1	1	1	1	1	1	1	1	1	1	1	1	1	1	1	1	1	1	1	1	1	1	1	1	1	1	1	1	1	1	1	1	1	1	1	1	1	1	1
group_1503	eAL	sensor domain-containing phosphodiesterase;EAL domain c-di-GMP-specific phosphodiesterase class I (or its enzymatically inactive variant)	568	568	1	1	4147	2058	2214	2213.73	1	1	1	1	1	1	1	1	1	1	1	1	1	1	1	1	1	1	1	1	1	1	1	1	1	1	1	1	1	1	1	1	1	1	1	1	1	1	1
btsT~~~cstA	btsT;cstA	Putative carbon starvation protein;Carbon starvation protein A;Carbon starvation protein;pyruvate/proton symporter BtsT;carbon starvation protein A;Inner membrane protein YjiY	568	574	1.01056	1	4144	825	2163	2139.59	1	1	1	1	1	1	1	1	1	1	1	1	1	1	1	1	1	1	1	1	1	1	1	1	1	1	1	1	1	1	1	1	1	1	1	1	1	1	1
barA	barA	two-component sensor histidine kinase BarA;BarA sensory histidine kinase ( VarS / GacS);Histidine kinase;response regulator	568	572	1.00704	1	4142	135	2757	2736.1	1	1	1	1	1	1	1	1	1	1	1	1	1	1	1	1	1	1	1	1	1	1	1	1	1	1	1	1	1	1	1	1	1	1	1	1	1	1	1
slrP	slrP	SPI-1 type III secretion system effector E3 ubiquitin transferase SlrP;E3 ubiquitin-protein ligase SlrP	568	569	1.00176	1	4141	390	2268	2263.79	1	1	1	1	1	1	1	1	1	1	1	1	1	1	1	1	1	1	1	1	1	1	1	1	1	1	1	1	1	1	1	1	1	1	1	1	1	1	1
adiC	adiC	Arginine/agmatine antiporter;arginine/agmatine antiporter	568	569	1.00176	1	4140	543	1338	1335.66	1	1	1	1	1	1	1	1	1	1	1	1	1	1	1	1	1	1	1	1	1	1	1	1	1	1	1	1	1	1	1	1	1	1	1	1	1	1	1
group_1501	pflB	formate C-acetyltransferase;2-ketobutyrate formate-lyase / Pyruvate formate-lyase;Formate acetyltransferase 3;Formate acetyltransferase;Keto-acid formate acetyltransferase	568	570	1.00352	1	4139	243	2295	2284.45	1	1	1	1	1	1	1	1	1	1	1	1	1	1	1	1	1	1	1	1	1	1	1	1	1	1	1	1	1	1	1	1	1	1	1	1	1	1	1
sopA~~~yjbI	sopA;yjbI	E3 ubiquitin-protein ligase SopA;Secreted effector protein;hypothetical protein;Uncharacterized conserved protein YjbI contains pentapeptide repeats;type III secretion system effector SopA E3 ubiquitin ligase	568	579	1.01937	1	4138	198	2349	2291.16	1	1	1	1	1	1	1	1	1	1	1	1	1	1	1	1	1	1	1	1	1	1	1	1	1	1	1	1	1	1	1	1	1	1	1	1	1	1	1
phsA	phsA	thiosulfate reductase PhsA;Thiosulfate reductase;Thiosulfate reductase molybdopterin-containing subunit PhsA;4Fe-4S Mo/W bis-MGD-type domain-containing protein	568	583	1.02641	1	4137	348	2277	2217.39	1	1	1	1	1	1	1	1	1	1	1	1	1	1	1	1	1	1	1	1	1	1	1	1	1	1	1	1	1	1	1	1	1	1	1	1	1	1	1
group_1500	bisC	Putative anaerobic dimethylsulfoxide reductase;Anaerobic selenocysteine-containing dehydrogenase	568	569	1.00176	1	4136	687	2379	2374.72	1	1	1	1	1	1	1	1	1	1	1	1	1	1	1	1	1	1	1	1	1	1	1	1	1	1	1	1	1	1	1	1	1	1	1	1	1	1	1
yfaS	yfaS	alpha-2-macroglobulin family protein;Lipoprotein;MG2 domain-containing protein;putative conserved protein YfaS alpha-2-macroglobulin family	568	571	1.00528	1	4135	1488	4935	4908.49	1	1	1	1	1	1	1	1	1	1	1	1	1	1	1	1	1	1	1	1	1	1	1	1	1	1	1	1	1	1	1	1	1	1	1	1	1	1	1
glgP	glgP	Alpha-14 glucan phosphorylase;glycogen phosphorylase	568	570	1.00352	1	4134	993	2448	2439.41	1	1	1	1	1	1	1	1	1	1	1	1	1	1	1	1	1	1	1	1	1	1	1	1	1	1	1	1	1	1	1	1	1	1	1	1	1	1	1
glgC	glgC	Glucose-1-phosphate adenylyltransferase;glucose-1-phosphate adenylyltransferase	568	569	1.00176	1	4133	507	1296	1293.8	1	1	1	1	1	1	1	1	1	1	1	1	1	1	1	1	1	1	1	1	1	1	1	1	1	1	1	1	1	1	1	1	1	1	1	1	1	1	1
mdoC	mdoC	Glucans biosynthesis protein;acyltransferase family protein;glucans biosynthesis protein MdoC	568	569	1.00176	1	4132	513	1155	1152.97	1	1	1	1	1	1	1	1	1	1	1	1	1	1	1	1	1	1	1	1	1	1	1	1	1	1	1	1	1	1	1	1	1	1	1	1	1	1	1
mdoH	mdoH	glucans biosynthesis glucosyltransferase MdoH	568	569	1.00176	1	4131	1152	2517	2512.68	1	1	1	1	1	1	1	1	1	1	1	1	1	1	1	1	1	1	1	1	1	1	1	1	1	1	1	1	1	1	1	1	1	1	1	1	1	1	1
mdoG	mdoG	Glucan biosynthesis protein G;glucans biosynthesis protein MdoG	568	569	1.00176	1	4130	543	1554	1551.32	1	1	1	1	1	1	1	1	1	1	1	1	1	1	1	1	1	1	1	1	1	1	1	1	1	1	1	1	1	1	1	1	1	1	1	1	1	1	1
fhuC	fhuC	Fe3+-hydroxamate ABC transporter ATP-binding protein FhuC	568	569	1.00176	1	4129	93	798	796.598	1	1	1	1	1	1	1	1	1	1	1	1	1	1	1	1	1	1	1	1	1	1	1	1	1	1	1	1	1	1	1	1	1	1	1	1	1	1	1
fhuA~~~cirA	fhuA;cirA	ferrichrome porin FhuA;Ferrichrome-iron receptor;Ferrichrome outer membrane transporter;TonB-dependent siderophore receptor;Ferric hydroxamate outer membrane receptor FhuA;TonB-dependent receptor plug domain-containing protein;Outer membrane receptor protein Fe transport;hypothetical protein	568	611	1.0757	1	4128	165	2247	2083.63	1	1	1	1	1	1	1	1	1	1	1	1	1	1	1	1	1	1	1	1	1	1	1	1	1	1	1	1	1	1	1	1	1	1	1	1	1	1	1
cyaA	cyaA	class I adenylate cyclase;Adenylate cyclase	568	570	1.00352	1	4126	633	2547	2537.89	1	1	1	1	1	1	1	1	1	1	1	1	1	1	1	1	1	1	1	1	1	1	1	1	1	1	1	1	1	1	1	1	1	1	1	1	1	1	1
fimD~~~bcfC	fimD;bcfC	fimbrial biogenesis usher protein;fimbria/pilus outer membrane usher protein;fimbrial usher BcfC	568	569	1.00176	1	4124	555	2622	2606.83	1	1	1	1	1	1	1	1	1	1	1	1	1	1	1	1	1	1	1	1	1	1	1	1	1	1	1	1	1	1	1	1	1	1	1	1	1	1	1
group_1497	rspA	mandelate racemase/muconate lactonizing enzyme family protein;MR-MLE-N domain-containing protein;L-alanine-DL-glutamate epimerase or related enzyme of enolase superfamily	568	569	1.00176	1	4123	417	1203	1200.85	1	1	1	1	1	1	1	1	1	1	1	1	1	1	1	1	1	1	1	1	1	1	1	1	1	1	1	1	1	1	1	1	1	1	1	1	1	1	1
rcsC	rcsC	Hybrid sensory kinase in two-component regulatory system with RcsB and YojN;two-component system sensor histidine kinase RcsC;response regulator	568	571	1.00528	1	4122	951	2847	2831.96	1	1	1	1	1	1	1	1	1	1	1	1	1	1	1	1	1	1	1	1	1	1	1	1	1	1	1	1	1	1	1	1	1	1	1	1	1	1	1
gyrA	gyrA	DNA topoisomerase (ATP-hydrolyzing);DNA gyrase subunit A GyrA	568	569	1.00176	1	4121	1116	2637	2632.1	1	1	1	1	1	1	1	1	1	1	1	1	1	1	1	1	1	1	1	1	1	1	1	1	1	1	1	1	1	1	1	1	1	1	1	1	1	1	1
ttrA	ttrA;	tetrathionate reductase subunit TtrA;Tetrathionate reductase subunit A;Tetrathionate reductase subunit TtrA	568	570	1.00352	1	4120	1188	3063	3051.95	1	1	1	1	1	1	1	1	1	1	1	1	1	1	1	1	1	1	1	1	1	1	1	1	1	1	1	1	1	1	1	1	1	1	1	1	1	1	1
ttrB	ttrB	Tetrathionate reductase subunit B;tetrathionate reductase subunit TtrB	568	571	1.00528	1	4119	363	735	731.217	1	1	1	1	1	1	1	1	1	1	1	1	1	1	1	1	1	1	1	1	1	1	1	1	1	1	1	1	1	1	1	1	1	1	1	1	1	1	1
ttrC	ttrC	Tetrathionate reductase subunit C (Membrane protein);tetrathionate reductase subunit TtrC	568	569	1.00176	1	4118	354	1023	1021.3	1	1	1	1	1	1	1	1	1	1	1	1	1	1	1	1	1	1	1	1	1	1	1	1	1	1	1	1	1	1	1	1	1	1	1	1	1	1	1
group_1496		Secreted chitinase;Chitinase;Chitodextrinase	568	572	1.00704	1	4117	321	1764	1751.7	1	1	1	1	1	1	1	1	1	1	1	1	1	1	1	1	1	1	1	1	1	1	1	1	1	1	1	1	1	1	1	1	1	1	1	1	1	1	1
accA	accA	acetyl-CoA carboxylase carboxyl transferase subunit alpha;hypothetical protein	568	569	1.00176	1	4116	438	960	958.381	1	1	1	1	1	1	1	1	1	1	1	1	1	1	1	1	1	1	1	1	1	1	1	1	1	1	1	1	1	1	1	1	1	1	1	1	1	1	1
tssM	tssM	hypothetical protein;type VI secretion system membrane subunit TssM	568	568	1	1	4114	345	3870	3863.79	1	1	1	1	1	1	1	1	1	1	1	1	1	1	1	1	1	1	1	1	1	1	1	1	1	1	1	1	1	1	1	1	1	1	1	1	1	1	1
group_1495		hypothetical protein;DUF2195 domain-containing protein;putative periplasmic protein	568	568	1	1	4113	303	486	387.026	1	1	1	1	1	1	1	1	1	1	1	1	1	1	1	1	1	1	1	1	1	1	1	1	1	1	1	1	1	1	1	1	1	1	1	1	1	1	1
group_1494	mukB	hypothetical protein;chromosome partition protein MukB	568	574	1.01056	1	4112	375	4584	4535.53	1	1	1	1	1	1	1	1	1	1	1	1	1	1	1	1	1	1	1	1	1	1	1	1	1	1	1	1	1	1	1	1	1	1	1	1	1	1	1
group_1492	dmsC	Anaerobic dimethyl sulfoxide reductase subunit C;dimethyl sulfoxide reductase anchor subunit;Anaerobic dimethyl sulfoxide reductase chain C;DMSO reductase anchor subunit DmsC	568	601	1.0581	1	4109	273	864	818.72	1	1	1	1	1	1	1	1	1	1	1	1	1	1	1	1	1	1	1	1	1	1	1	1	1	1	1	1	1	1	1	1	1	1	1	1	1	1	1
narP	narP	nitrate/nitrite response regulator protein NarP	568	568	1	1	4082	648	690	648.074	1	1	1	1	1	1	1	1	1	1	1	1	1	1	1	1	1	1	1	1	1	1	1	1	1	1	1	1	1	1	1	1	1	1	1	1	1	1	1
group_1475	yhjD	Inner membrane protein YhjD;inner membrane protein YhjD	568	569	1.00176	1	4077	138	1029	1026.99	1	1	1	1	1	1	1	1	1	1	1	1	1	1	1	1	1	1	1	1	1	1	1	1	1	1	1	1	1	1	1	1	1	1	1	1	1	1	1
yhjE~~~melB	yhjE;melB	Inner membrane metabolite transport protein YhjE;Na+/melibiose symporter or related transporter	568	568	1	1	4075	1188	1323	1197.51	1	1	1	1	1	1	1	1	1	1	1	1	1	1	1	1	1	1	1	1	1	1	1	1	1	1	1	1	1	1	1	1	1	1	1	1	1	1	1
sodB	sodB	Superoxide dismutase;hypothetical protein;superoxide dismutase [Fe]	568	569	1.00176	1	4068	210	582	580.977	1	1	1	1	1	1	1	1	1	1	1	1	1	1	1	1	1	1	1	1	1	1	1	1	1	1	1	1	1	1	1	1	1	1	1	1	1	1	1
mgtA~~~mgtB	mgtA;mgtB	magnesium-translocating P-type ATPase;hypothetical protein;Magnesium transporting ATPase P-type 1;Mg2+ transport protein	568	570	1.00352	1	4066	162	2727	2717.05	1	1	1	1	1	1	1	1	1	1	1	1	1	1	1	1	1	1	1	1	1	1	1	1	1	1	1	1	1	1	1	1	1	1	1	1	1	1	1
group_1472		hypothetical protein;glycosyltransferase family 39 protein;Putative inner membrane protein;PMT-2 domain-containing protein;putative membrane protein PF0508 contains N-terminal glycosyltransferase domain of PMT family	568	570	1.00352	1	4065	696	1551	1542.81	1	1	1	1	1	1	1	1	1	1	1	1	1	1	1	1	1	1	1	1	1	1	1	1	1	1	1	1	1	1	1	1	1	1	1	1	1	1	1
robA	robA	hypothetical protein;Right origin-binding protein;GyrI-like domain-containing protein;MDR efflux pump AcrAB transcriptional activator RobA	568	569	1.00176	1	4063	144	870	864.833	1	1	1	1	1	1	1	1	1	1	1	1	1	1	1	1	1	1	1	1	1	1	1	1	1	1	1	1	1	1	1	1	1	1	1	1	1	1	1
pepD	pepD	hypothetical protein;C69 family dipeptidase	568	569	1.00176	1	4062	186	1563	1557.69	1	1	1	1	1	1	1	1	1	1	1	1	1	1	1	1	1	1	1	1	1	1	1	1	1	1	1	1	1	1	1	1	1	1	1	1	1	1	1
sopB	sopB	hypothetical protein;SPI-1 type III secretion system effector inositol phosphate phosphatase SopB	568	568	1	1	4061	312	1686	1681.16	1	1	1	1	1	1	1	1	1	1	1	1	1	1	1	1	1	1	1	1	1	1	1	1	1	1	1	1	1	1	1	1	1	1	1	1	1	1	1
solA	solA	N-methyl-L-tryptophan oxidase	568	568	1	1	4060	756	1119	1118.36	1	1	1	1	1	1	1	1	1	1	1	1	1	1	1	1	1	1	1	1	1	1	1	1	1	1	1	1	1	1	1	1	1	1	1	1	1	1	1
acnA	acnA	Aconitate hydratase 1;aconitate hydratase;aconitate hydratase AcnA;Aconitate hydratase	568	570	1.00352	1	4059	303	2676	2666.51	1	1	1	1	1	1	1	1	1	1	1	1	1	1	1	1	1	1	1	1	1	1	1	1	1	1	1	1	1	1	1	1	1	1	1	1	1	1	1
cysB	cysB	HTH-type transcriptional regulator CysB	568	568	1	1	4058	801	975	974.694	1	1	1	1	1	1	1	1	1	1	1	1	1	1	1	1	1	1	1	1	1	1	1	1	1	1	1	1	1	1	1	1	1	1	1	1	1	1	1
group_1471	cydB	cytochrome d ubiquinol oxidase subunit II;hypothetical protein	568	569	1.00176	1	4057	141	1011	1009.23	1	1	1	1	1	1	1	1	1	1	1	1	1	1	1	1	1	1	1	1	1	1	1	1	1	1	1	1	1	1	1	1	1	1	1	1	1	1	1
yedQ~~~dgcQ	yedQ;dgcQ	cellulose biosynthesis regulator YedQ;cellulose biosynthesis regulator diguanylate cyclase DgcQ	568	568	1	1	4055	1614	1713	1712.83	1	1	1	1	1	1	1	1	1	1	1	1	1	1	1	1	1	1	1	1	1	1	1	1	1	1	1	1	1	1	1	1	1	1	1	1	1	1	1
exbB	exbB	Biopolymer transport protein ExbB;tol-pal system-associated acyl-CoA thioesterase	568	569	1.00176	1	4053	279	735	733.719	1	1	1	1	1	1	1	1	1	1	1	1	1	1	1	1	1	1	1	1	1	1	1	1	1	1	1	1	1	1	1	1	1	1	1	1	1	1	1
group_1469	dnaJ	Chaperone protein DnaJ;molecular chaperone DnaJ	568	568	1	1	4052	474	1173	1139	1	1	1	1	1	1	1	1	1	1	1	1	1	1	1	1	1	1	1	1	1	1	1	1	1	1	1	1	1	1	1	1	1	1	1	1	1	1	1
yebO	yebO	Uncharacterized protein YebO;putative protein YebO	568	568	1	1	4051	288	288	288	1	1	1	1	1	1	1	1	1	1	1	1	1	1	1	1	1	1	1	1	1	1	1	1	1	1	1	1	1	1	1	1	1	1	1	1	1	1	1
group_1468		Beta-lactamase domain-containing protein;Metallo-beta-lactamase superfamily protein;Metal-dependent hydrolase beta-lactamase superfamily II	568	569	1.00176	1	4050	372	798	796.603	1	1	1	1	1	1	1	1	1	1	1	1	1	1	1	1	1	1	1	1	1	1	1	1	1	1	1	1	1	1	1	1	1	1	1	1	1	1	1
rfbF	rfbF	glucose-1-phosphate cytidylyltransferase;Glucose-1-phosphate cytidylyltransferase	568	569	1.00176	1	4047	225	774	772.45	1	1	1	1	1	1	1	1	1	1	1	1	1	1	1	1	1	1	1	1	1	1	1	1	1	1	1	1	1	1	1	1	1	1	1	1	1	1	1
adhE	adhE	succinate-semialdehyde dehydrogenase;Succinate-semialdehyde dehydrogenase [NADP(+)] 1;Aldehyde dehydrogenase;Acyl-CoA reductase or other NAD-dependent aldehyde dehydrogenase	568	569	1.00176	1	4046	177	1371	1368.08	1	1	1	1	1	1	1	1	1	1	1	1	1	1	1	1	1	1	1	1	1	1	1	1	1	1	1	1	1	1	1	1	1	1	1	1	1	1	1
group_1465	ydiV	hypothetical protein;Anti-FlhC(2)FlhD(4) factor YdiV	568	570	1.00352	1	4045	114	1506	1500.06	1	1	1	1	1	1	1	1	1	1	1	1	1	1	1	1	1	1	1	1	1	1	1	1	1	1	1	1	1	1	1	1	1	1	1	1	1	1	1
group_1464	rpnC	Transposase_31;transposase;Recombination-promoting DNA endonuclease RpnC/YadD	568	569	1.00176	1	4044	249	936	934.165	1	1	1	1	1	1	1	1	1	1	1	1	1	1	1	1	1	1	1	1	1	1	1	1	1	1	1	1	1	1	1	1	1	1	1	1	1	1	1
group_1463		hypothetical protein;DUF2514 domain-containing protein	568	568	1	1	4042	327	411	410.852	1	1	1	1	1	1	1	1	1	1	1	1	1	1	1	1	1	1	1	1	1	1	1	1	1	1	1	1	1	1	1	1	1	1	1	1	1	1	1
cls~~~clsA	cls;clsA	Cardiolipin synthetase;cardiolipin synthase;cardiolipin synthase ClsA	568	570	1.00352	1	4040	570	1461	1455.77	1	1	1	1	1	1	1	1	1	1	1	1	1	1	1	1	1	1	1	1	1	1	1	1	1	1	1	1	1	1	1	1	1	1	1	1	1	1	1
group_1461		DNA breaking-rejoining protein;DUF1441 domain-containing protein	568	568	1	1	4038	441	492	491.91	1	1	1	1	1	1	1	1	1	1	1	1	1	1	1	1	1	1	1	1	1	1	1	1	1	1	1	1	1	1	1	1	1	1	1	1	1	1	1
group_1459	tcyP	cation:dicarboxylase symporter family transporter;C4-dicarboxylate transport protein;L-cystine transporter	568	569	1.00176	1	4034	678	1350	1347.69	1	1	1	1	1	1	1	1	1	1	1	1	1	1	1	1	1	1	1	1	1	1	1	1	1	1	1	1	1	1	1	1	1	1	1	1	1	1	1
aroL	aroL	shikimate kinase AroL	568	568	1	1	4033	477	546	545.879	1	1	1	1	1	1	1	1	1	1	1	1	1	1	1	1	1	1	1	1	1	1	1	1	1	1	1	1	1	1	1	1	1	1	1	1	1	1	1
group_1458	caiA	acyl-CoA dehydrogenase;Acyl-CoA dehydrogenase related to the alkylation response protein AidB	568	568	1	1	4032	897	1164	1163.53	1	1	1	1	1	1	1	1	1	1	1	1	1	1	1	1	1	1	1	1	1	1	1	1	1	1	1	1	1	1	1	1	1	1	1	1	1	1	1
ydbH	ydbH	YdbH family protein;hypothetical protein	568	569	1.00176	1	4031	723	2637	2632.19	1	1	1	1	1	1	1	1	1	1	1	1	1	1	1	1	1	1	1	1	1	1	1	1	1	1	1	1	1	1	1	1	1	1	1	1	1	1	1
rcsA	rcsA	transcriptional regulator RcsA	568	569	1.00176	1	4028	306	624	622.893	1	1	1	1	1	1	1	1	1	1	1	1	1	1	1	1	1	1	1	1	1	1	1	1	1	1	1	1	1	1	1	1	1	1	1	1	1	1	1
cstA	cstA	Carbon starvation protein A;pyruvate/proton symporter CstA	568	569	1.00176	1	4026	714	2106	2102.11	1	1	1	1	1	1	1	1	1	1	1	1	1	1	1	1	1	1	1	1	1	1	1	1	1	1	1	1	1	1	1	1	1	1	1	1	1	1	1
yegD	yegD	Hsp70 protein;molecular chaperone	568	569	1.00176	1	4025	429	1353	1350.63	1	1	1	1	1	1	1	1	1	1	1	1	1	1	1	1	1	1	1	1	1	1	1	1	1	1	1	1	1	1	1	1	1	1	1	1	1	1	1
mdtA~~~acrA	mdtA;acrA	multidrug efflux RND transporter subunit MdtA;MdtA/MuxA family multidrug efflux RND transporter periplasmic adaptor subunit	568	568	1	1	4024	1002	1239	1237.91	1	1	1	1	1	1	1	1	1	1	1	1	1	1	1	1	1	1	1	1	1	1	1	1	1	1	1	1	1	1	1	1	1	1	1	1	1	1	1
tmcA	tmcA	tRNA(Met) cytidine acetyltransferase TmcA;putative P-loop ATPase fused to an acetyltransferase COG1444;tRNA cytosine(34) acetyltransferase TmcA	568	569	1.00176	1	4022	927	2019	2014.79	1	1	1	1	1	1	1	1	1	1	1	1	1	1	1	1	1	1	1	1	1	1	1	1	1	1	1	1	1	1	1	1	1	1	1	1	1	1	1
group_1455	kefB	glutathione-regulated potassium-efflux system protein KefB;Putative glutathione-regulated potassium-efflux system protein KefB	568	568	1	1	4021	1806	2343	1807.06	1	1	1	1	1	1	1	1	1	1	1	1	1	1	1	1	1	1	1	1	1	1	1	1	1	1	1	1	1	1	1	1	1	1	1	1	1	1	1
yqiJ	yqiJ	Membrane protein YqiJ;DUF1449 domain-containing protein;YqiJ family protein	568	569	1.00176	1	4020	195	621	619.819	1	1	1	1	1	1	1	1	1	1	1	1	1	1	1	1	1	1	1	1	1	1	1	1	1	1	1	1	1	1	1	1	1	1	1	1	1	1	1
aaeR	aaeR	LysR family transcriptional regulator;Putative DNA-binding transcriptional regulator;HTH-type transcriptional activator AaeR	568	593	1.04401	1	4019	351	930	890.287	1	1	1	1	1	1	1	1	1	1	1	1	1	1	1	1	1	1	1	1	1	1	1	1	1	1	1	1	1	1	1	1	1	1	1	1	1	1	1
paeA	paeA	Membrane protein;Polyamine export protein	568	568	1	1	4017	408	1344	1342.35	1	1	1	1	1	1	1	1	1	1	1	1	1	1	1	1	1	1	1	1	1	1	1	1	1	1	1	1	1	1	1	1	1	1	1	1	1	1	1
ttrR	ttrR	hypothetical protein;Transcriptional regulatory protein fixJ;tetrathionate respiration response regulator TtrR;two-component system response regulator TtrR	568	571	1.00528	1	4015	183	621	617.354	1	1	1	1	1	1	1	1	1	1	1	1	1	1	1	1	1	1	1	1	1	1	1	1	1	1	1	1	1	1	1	1	1	1	1	1	1	1	1
group_1454	mviM	Putative oxidoreductase;oxidoreductase;putative dehydrogenase	568	570	1.00352	1	4014	222	1041	1037.34	1	1	1	1	1	1	1	1	1	1	1	1	1	1	1	1	1	1	1	1	1	1	1	1	1	1	1	1	1	1	1	1	1	1	1	1	1	1	1
fimW	fimW	hypothetical protein;fimbria biosynthesis transcriptional regulator FimW;helix-turn-helix transcriptional regulator	568	568	1	1	4012	162	597	594.196	1	1	1	1	1	1	1	1	1	1	1	1	1	1	1	1	1	1	1	1	1	1	1	1	1	1	1	1	1	1	1	1	1	1	1	1	1	1	1
aat	aat	leucyl/phenylalanyl-tRNA--protein transferase;hypothetical protein	568	572	1.00704	1	4011	147	741	699.545	1	1	1	1	1	1	1	1	1	1	1	1	1	1	1	1	1	1	1	1	1	1	1	1	1	1	1	1	1	1	1	1	1	1	1	1	1	1	1
adeB~~~acrB	adeB;acrB	hydrophobe/amphiphile efflux-1 family RND transporter;Efflux pump membrane transporter;efflux RND transporter permease subunit;Hydrophobe/amphiphile efflux-1 family RND transporter;Multidrug efflux pump subunit AcrB	568	570	1.00352	1	4010	582	3114	3103.06	1	1	1	1	1	1	1	1	1	1	1	1	1	1	1	1	1	1	1	1	1	1	1	1	1	1	1	1	1	1	1	1	1	1	1	1	1	1	1
group_1452		DUF3053 domain-containing protein	568	568	1	1	4009	705	762	761.9	1	1	1	1	1	1	1	1	1	1	1	1	1	1	1	1	1	1	1	1	1	1	1	1	1	1	1	1	1	1	1	1	1	1	1	1	1	1	1
agp	agp	bifunctional glucose-1-phosphatase/inositol phosphatase	568	568	1	1	4007	819	1242	1241.09	1	1	1	1	1	1	1	1	1	1	1	1	1	1	1	1	1	1	1	1	1	1	1	1	1	1	1	1	1	1	1	1	1	1	1	1	1	1	1
chaA	chaA	hypothetical protein;sodium-potassium/proton antiporter ChaA	568	569	1.00176	1	4006	90	1101	1099.03	1	1	1	1	1	1	1	1	1	1	1	1	1	1	1	1	1	1	1	1	1	1	1	1	1	1	1	1	1	1	1	1	1	1	1	1	1	1	1
gGDEF	gGDEF	GGDEF domain-containing protein;GGDEF domain diguanylate cyclase (c-di-GMP synthetase) or its enzymatically inactive variants	568	568	1	1	4004	888	1065	1064.69	1	1	1	1	1	1	1	1	1	1	1	1	1	1	1	1	1	1	1	1	1	1	1	1	1	1	1	1	1	1	1	1	1	1	1	1	1	1	1
fabF	fabF	3-oxoacyl-[acyl-carrier-protein] synthase 2;3-oxoacyl-ACP synthase;beta-ketoacyl-ACP synthase II	568	569	1.00176	1	4003	633	1242	1239.88	1	1	1	1	1	1	1	1	1	1	1	1	1	1	1	1	1	1	1	1	1	1	1	1	1	1	1	1	1	1	1	1	1	1	1	1	1	1	1
slyA	slyA	transcriptional regulator SlyA	568	569	1.00176	1	4001	129	435	433.951	1	1	1	1	1	1	1	1	1	1	1	1	1	1	1	1	1	1	1	1	1	1	1	1	1	1	1	1	1	1	1	1	1	1	1	1	1	1	1
envE	envE	Ricin B-type lectin domain-containing protein;hypothetical protein;putative lipoprotein EnvE	568	570	1.00352	1	3999	171	522	519.042	1	1	1	1	1	1	1	1	1	1	1	1	1	1	1	1	1	1	1	1	1	1	1	1	1	1	1	1	1	1	1	1	1	1	1	1	1	1	1
pdxK	pdxK	bifunctional hydroxymethylpyrimidine kinase/phosphomethylpyrimidine kinase;pyridoxine/pyridoxal/pyridoxamine kinase	568	570	1.00352	1	3998	279	858	854.968	1	1	1	1	1	1	1	1	1	1	1	1	1	1	1	1	1	1	1	1	1	1	1	1	1	1	1	1	1	1	1	1	1	1	1	1	1	1	1
group_1448	qor	Quinone oxidoreductase NADPH-dependent;Quinone oxidoreductase	568	569	1.00176	1	3997	411	984	982.271	1	1	1	1	1	1	1	1	1	1	1	1	1	1	1	1	1	1	1	1	1	1	1	1	1	1	1	1	1	1	1	1	1	1	1	1	1	1	1
prgH	prgH	type III secretion system inner membrane ring protein PrgH	568	568	1	1	3995	1089	1236	1235.1	1	1	1	1	1	1	1	1	1	1	1	1	1	1	1	1	1	1	1	1	1	1	1	1	1	1	1	1	1	1	1	1	1	1	1	1	1	1	1
sipA	sipA	Pathogenicity island 1 effector protein SipA;hypothetical protein;SPI-1 type III secretion system effector SipA	568	569	1.00176	1	3992	708	2058	2044.8	1	1	1	1	1	1	1	1	1	1	1	1	1	1	1	1	1	1	1	1	1	1	1	1	1	1	1	1	1	1	1	1	1	1	1	1	1	1	1
group_1446	fepB	Fe/B12 periplasmic-binding domain-containing protein;Putative ABC-transport protein periplasmic-binding component;ABC-type Fe3+-hydroxamate transport system periplasmic component	568	570	1.00352	1	3991	141	1053	1049.27	1	1	1	1	1	1	1	1	1	1	1	1	1	1	1	1	1	1	1	1	1	1	1	1	1	1	1	1	1	1	1	1	1	1	1	1	1	1	1
ssaJ	ssaJ	pathogenicity island lipoprotein;EscJ/YscJ/HrcJ family type III secretion inner membrane ring protein SsaJ;Type III secretion bridge SsaJ;SPI-2 type III secretion system apparatus lipoprotein SsaJ	568	570	1.00352	1	3990	165	750	744.845	1	1	1	1	1	1	1	1	1	1	1	1	1	1	1	1	1	1	1	1	1	1	1	1	1	1	1	1	1	1	1	1	1	1	1	1	1	1	1
sohB	sohB	Putative protease sohB;protease SohB	568	570	1.00352	1	3989	306	1047	1043.39	1	1	1	1	1	1	1	1	1	1	1	1	1	1	1	1	1	1	1	1	1	1	1	1	1	1	1	1	1	1	1	1	1	1	1	1	1	1	1
topA	topA	type I DNA topoisomerase;Omega-protein	568	570	1.00352	1	3988	447	2598	2588.75	1	1	1	1	1	1	1	1	1	1	1	1	1	1	1	1	1	1	1	1	1	1	1	1	1	1	1	1	1	1	1	1	1	1	1	1	1	1	1
pyrC	pyrC	dihydroorotase	568	568	1	1	3987	1047	1365	1047.56	1	1	1	1	1	1	1	1	1	1	1	1	1	1	1	1	1	1	1	1	1	1	1	1	1	1	1	1	1	1	1	1	1	1	1	1	1	1	1
uspE	uspE	universal stress protein UspE	568	569	1.00176	1	3986	429	948	946.334	1	1	1	1	1	1	1	1	1	1	1	1	1	1	1	1	1	1	1	1	1	1	1	1	1	1	1	1	1	1	1	1	1	1	1	1	1	1	1
group_1445	araJ	MFS transporter;putative arabinose efflux permease AraJ MFS family	568	568	1	1	3985	1143	1320	1218	1	1	1	1	1	1	1	1	1	1	1	1	1	1	1	1	1	1	1	1	1	1	1	1	1	1	1	1	1	1	1	1	1	1	1	1	1	1	1
group_1444	cfa	class I SAM-dependent methyltransferase;Cyclopropane fatty-acyl-phospholipid synthase and related methyltransferases	568	569	1.00176	1	3984	618	1626	1623.01	1	1	1	1	1	1	1	1	1	1	1	1	1	1	1	1	1	1	1	1	1	1	1	1	1	1	1	1	1	1	1	1	1	1	1	1	1	1	1
group_1443		cytoplasmic protein;Cytoplasmic protein	568	568	1	1	3983	1197	1254	1253.9	1	1	1	1	1	1	1	1	1	1	1	1	1	1	1	1	1	1	1	1	1	1	1	1	1	1	1	1	1	1	1	1	1	1	1	1	1	1	1
group_1440	yjcC	CSS-motif domain-containing protein;Anti-FlhC(2)FlhD(4) factor YdiV;Redox-sensing c-di-GMP phosphodiesterase contains CSS-motif and EAL domains	568	571	1.00528	1	3980	510	1551	1542.65	1	1	1	1	1	1	1	1	1	1	1	1	1	1	1	1	1	1	1	1	1	1	1	1	1	1	1	1	1	1	1	1	1	1	1	1	1	1	1
ybiB	ybiB	Putative glycosyl transferase;DNA-binding protein YbiB	568	569	1.00176	1	3979	303	975	973.286	1	1	1	1	1	1	1	1	1	1	1	1	1	1	1	1	1	1	1	1	1	1	1	1	1	1	1	1	1	1	1	1	1	1	1	1	1	1	1
ilvE	ilvE	Branched-chain amino-acid aminotransferase;branched-chain-amino-acid transaminase	568	569	1.00176	1	3977	420	930	928.371	1	1	1	1	1	1	1	1	1	1	1	1	1	1	1	1	1	1	1	1	1	1	1	1	1	1	1	1	1	1	1	1	1	1	1	1	1	1	1
dacA	dacA	D-alanyl-D-alanine carboxypeptidase;D-alanyl-D-alanine carboxypeptidase DacA;D-alanyl-D-alanine carboxypeptidase dacA	568	571	1.00528	1	3976	429	1212	1205.61	1	1	1	1	1	1	1	1	1	1	1	1	1	1	1	1	1	1	1	1	1	1	1	1	1	1	1	1	1	1	1	1	1	1	1	1	1	1	1
group_1438	fixB	Electron transfer flavoprotein subunit alpha;electron transfer flavoprotein subunit alpha;Electron transfer flavoprotein alpha subunit FixB	568	568	1	1	3975	738	954	952.511	1	1	1	1	1	1	1	1	1	1	1	1	1	1	1	1	1	1	1	1	1	1	1	1	1	1	1	1	1	1	1	1	1	1	1	1	1	1	1
group_1436	ptsN	hypothetical protein;Phosphotransferase system mannitol/fructose-specific IIA domain (Ntr-type)	568	569	1.00176	1	3973	105	444	443.225	1	1	1	1	1	1	1	1	1	1	1	1	1	1	1	1	1	1	1	1	1	1	1	1	1	1	1	1	1	1	1	1	1	1	1	1	1	1	1
group_1435	sdaC	Serine transporter;Serine transporter family protein;Transporte protein YqeG;Amino acid transporter;Amino acid permease	568	570	1.00352	1	3971	342	1230	1225.75	1	1	1	1	1	1	1	1	1	1	1	1	1	1	1	1	1	1	1	1	1	1	1	1	1	1	1	1	1	1	1	1	1	1	1	1	1	1	1
rapZ	rapZ	GlmZ(SRNA)-inactivating NTPase;RNase adapter RapZ	568	569	1.00176	1	3970	318	855	853.46	1	1	1	1	1	1	1	1	1	1	1	1	1	1	1	1	1	1	1	1	1	1	1	1	1	1	1	1	1	1	1	1	1	1	1	1	1	1	1
prpR	prpR	hypothetical protein;propionate catabolism operon regulatory protein PrpR	568	569	1.00176	1	3969	195	1626	1623.14	1	1	1	1	1	1	1	1	1	1	1	1	1	1	1	1	1	1	1	1	1	1	1	1	1	1	1	1	1	1	1	1	1	1	1	1	1	1	1
cbiM	cbiM	cobalt ECF transporter S component CbiM	568	568	1	1	3964	612	738	737.778	1	1	1	1	1	1	1	1	1	1	1	1	1	1	1	1	1	1	1	1	1	1	1	1	1	1	1	1	1	1	1	1	1	1	1	1	1	1	1
fadI	fadI	hypothetical protein;acetyl-CoA C-acyltransferase FadI	568	569	1.00176	1	3963	207	1311	1308.46	1	1	1	1	1	1	1	1	1	1	1	1	1	1	1	1	1	1	1	1	1	1	1	1	1	1	1	1	1	1	1	1	1	1	1	1	1	1	1
mrr	mrr	restriction endonuclease;Mrr restriction system protein;hypothetical protein;Restriction endonuclease Mrr	568	570	1.00352	1	3962	186	915	911.8	1	1	1	1	1	1	1	1	1	1	1	1	1	1	1	1	1	1	1	1	1	1	1	1	1	1	1	1	1	1	1	1	1	1	1	1	1	1	1
group_1431	fixX	Protein FixC;ferredoxin-like protein FixX	568	569	1.00176	1	3961	606	1287	1284.64	1	1	1	1	1	1	1	1	1	1	1	1	1	1	1	1	1	1	1	1	1	1	1	1	1	1	1	1	1	1	1	1	1	1	1	1	1	1	1
group_1430	tar	Methyl-accepting chemotaxis protein;methyl-accepting chemotaxis protein;Methyl-accepting chemotaxis sensory transducer;Methyl-accepting chemotaxis protein (MCP)	568	575	1.01232	1	3960	432	1644	1616.84	1	1	1	1	1	1	1	1	1	1	1	1	1	1	1	1	1	1	1	1	1	1	1	1	1	1	1	1	1	1	1	1	1	1	1	1	1	1	1
nfsA	nfsA	Oxygen-insensitive NADPH nitroreductase;nitroreductase NfsA	568	571	1.00528	1	3958	339	723	718.996	1	1	1	1	1	1	1	1	1	1	1	1	1	1	1	1	1	1	1	1	1	1	1	1	1	1	1	1	1	1	1	1	1	1	1	1	1	1	1
ssaG	ssaG	type III secretion system needle filament protein SsaG	568	568	1	1	3957	216	219	218.989	1	1	1	1	1	1	1	1	1	1	1	1	1	1	1	1	1	1	1	1	1	1	1	1	1	1	1	1	1	1	1	1	1	1	1	1	1	1	1
fadK	fadK	Short-chain-fatty-acid--CoA ligase;medium-chain fatty-acid--CoA ligase	568	571	1.00528	1	3956	153	1641	1631.97	1	1	1	1	1	1	1	1	1	1	1	1	1	1	1	1	1	1	1	1	1	1	1	1	1	1	1	1	1	1	1	1	1	1	1	1	1	1	1
group_1428	phoH	hypothetical protein;Nucleoside triphosphate hydrolase;phosphate starvation-inducible protein PhoH	568	569	1.00176	1	3955	192	789	787.381	1	1	1	1	1	1	1	1	1	1	1	1	1	1	1	1	1	1	1	1	1	1	1	1	1	1	1	1	1	1	1	1	1	1	1	1	1	1	1
tonB	tonB	Transport protein TonB;TonB system transport protein TonB	568	568	1	1	3954	465	723	722.546	1	1	1	1	1	1	1	1	1	1	1	1	1	1	1	1	1	1	1	1	1	1	1	1	1	1	1	1	1	1	1	1	1	1	1	1	1	1	1
group_1426	pspE	DUF2892 domain-containing protein;Rhodanese-related sulfurtransferase	568	568	1	1	3952	528	546	528.063	1	1	1	1	1	1	1	1	1	1	1	1	1	1	1	1	1	1	1	1	1	1	1	1	1	1	1	1	1	1	1	1	1	1	1	1	1	1	1
group_1425		hypothetical protein;integrase domain-containing protein;DNA-binding protein	568	569	1.00176	1	3951	120	885	883.413	1	1	1	1	1	1	1	1	1	1	1	1	1	1	1	1	1	1	1	1	1	1	1	1	1	1	1	1	1	1	1	1	1	1	1	1	1	1	1
ulaA	ulaA	PTS system ascorbate-specific transporter;PTS system ascorbate-specific transporter subunit IIC;hypothetical protein;PTS ascorbate transporter subunit IIC;PTS ascorbate-specific subunit IIBC	568	573	1.0088	1	3950	177	1398	1385.52	1	1	1	1	1	1	1	1	1	1	1	1	1	1	1	1	1	1	1	1	1	1	1	1	1	1	1	1	1	1	1	1	1	1	1	1	1	1	1
dNA2	dNA2	Superfamily I DNA helicase;DNA helicase;hypothetical protein;Nuclease NucT;AAA domain-containing protein;Superfamily I DNA and/or RNA helicase	568	580	1.02113	1	3949	276	3516	3440.95	1	1	1	1	1	1	1	1	1	1	1	1	1	1	1	1	1	1	1	1	1	1	1	1	1	1	1	1	1	1	1	1	1	1	1	1	1	1	1
group_1423		DUF3561 domain-containing protein;Inner membrane protein ygbE	568	571	1.00528	1	3947	132	324	322.298	1	1	1	1	1	1	1	1	1	1	1	1	1	1	1	1	1	1	1	1	1	1	1	1	1	1	1	1	1	1	1	1	1	1	1	1	1	1	1
ispB	ispB	octaprenyl diphosphate synthase	568	568	1	1	3946	972	1113	1112.5	1	1	1	1	1	1	1	1	1	1	1	1	1	1	1	1	1	1	1	1	1	1	1	1	1	1	1	1	1	1	1	1	1	1	1	1	1	1	1
yjeM	yjeM	glutamate/gamma-aminobutyrate family transporter YjeM;Transporter	568	569	1.00176	1	3945	273	1503	1500.32	1	1	1	1	1	1	1	1	1	1	1	1	1	1	1	1	1	1	1	1	1	1	1	1	1	1	1	1	1	1	1	1	1	1	1	1	1	1	1
mscM	mscM	hypothetical protein;Mechanosensitive ion channel family protein;miniconductance mechanosensitive channel MscM	568	572	1.00704	1	3944	969	3327	3303.49	1	1	1	1	1	1	1	1	1	1	1	1	1	1	1	1	1	1	1	1	1	1	1	1	1	1	1	1	1	1	1	1	1	1	1	1	1	1	1
ddpA	ddpA	nickel ABC transporter substrate-binding protein;ABC-type transport system periplasmic component	568	568	1	1	3943	1587	1635	1587.42	1	1	1	1	1	1	1	1	1	1	1	1	1	1	1	1	1	1	1	1	1	1	1	1	1	1	1	1	1	1	1	1	1	1	1	1	1	1	1
fliF	fliF	flagellar M-ring protein FliF;flagellar M-ring protein;flagellar basal-body MS-ring/collar protein FliF	568	569	1.00176	1	3942	234	1683	1679.99	1	1	1	1	1	1	1	1	1	1	1	1	1	1	1	1	1	1	1	1	1	1	1	1	1	1	1	1	1	1	1	1	1	1	1	1	1	1	1
mdaB	mdaB	NAD(P)H dehydrogenase (Quinone);Oxidoreductase;Putative NADPH-quinone reductase (modulator of drug activity B)	568	569	1.00176	1	3940	225	582	580.998	1	1	1	1	1	1	1	1	1	1	1	1	1	1	1	1	1	1	1	1	1	1	1	1	1	1	1	1	1	1	1	1	1	1	1	1	1	1	1
blc	blc	Outer membrane lipoprotein Blc;hypothetical protein;Bacterial lipocalin Blc	568	569	1.00176	1	3939	129	534	532.845	1	1	1	1	1	1	1	1	1	1	1	1	1	1	1	1	1	1	1	1	1	1	1	1	1	1	1	1	1	1	1	1	1	1	1	1	1	1	1
rlmI	rlmI	Putative methyltransferase;23S rRNA m(5)C1962 methyltransferase;23S rRNA (cytosine(1962)-C(5))-methyltransferase RlmI	568	569	1.00176	1	3938	579	1212	1209.98	1	1	1	1	1	1	1	1	1	1	1	1	1	1	1	1	1	1	1	1	1	1	1	1	1	1	1	1	1	1	1	1	1	1	1	1	1	1	1
yhbS	yhbS	GNAT family N-acetyltransferase;putative N-acetyltransferase YhbS;Uncharacterized N-acetyltransferase YhbS	568	568	1	1	3937	405	534	503.361	1	1	1	1	1	1	1	1	1	1	1	1	1	1	1	1	1	1	1	1	1	1	1	1	1	1	1	1	1	1	1	1	1	1	1	1	1	1	1
acnB	acnB	Aconitase domain-containing protein;Aconitase B;bifunctional aconitate hydratase 2/2-methylisocitrate dehydratase	568	569	1.00176	1	3935	333	2598	2593.31	1	1	1	1	1	1	1	1	1	1	1	1	1	1	1	1	1	1	1	1	1	1	1	1	1	1	1	1	1	1	1	1	1	1	1	1	1	1	1
pssA	pssA	CDP-diacylglycerol--serine O-phosphatidyltransferase	568	569	1.00176	1	3934	579	1356	1353.58	1	1	1	1	1	1	1	1	1	1	1	1	1	1	1	1	1	1	1	1	1	1	1	1	1	1	1	1	1	1	1	1	1	1	1	1	1	1	1
group_1421	ptsH	HPr family phosphocarrier protein;HPr or related phosphotransfer protein	568	568	1	1	3933	198	270	269.873	1	1	1	1	1	1	1	1	1	1	1	1	1	1	1	1	1	1	1	1	1	1	1	1	1	1	1	1	1	1	1	1	1	1	1	1	1	1	1
aRO8	aRO8	DeoR family transcriptional regulator;hypothetical protein;DNA-binding transcriptional regulator MocR family contains an aminotransferase domain	568	570	1.00352	1	3932	576	1677	1330.99	1	1	1	1	1	1	1	1	1	1	1	1	1	1	1	1	1	1	1	1	1	1	1	1	1	1	1	1	1	1	1	1	1	1	1	1	1	1	1
nirC	nirC	putative nitrite transporter;nitrite transporter NirC	568	573	1.0088	1	3931	300	810	802.806	1	1	1	1	1	1	1	1	1	1	1	1	1	1	1	1	1	1	1	1	1	1	1	1	1	1	1	1	1	1	1	1	1	1	1	1	1	1	1
nirB	nirB	Nitrite reductase large subunit;Nitrite reductase [NAD(P)H] large subunit;NADPH-nitrite reductase large subunit	568	570	1.00352	1	3930	594	2544	2535.03	1	1	1	1	1	1	1	1	1	1	1	1	1	1	1	1	1	1	1	1	1	1	1	1	1	1	1	1	1	1	1	1	1	1	1	1	1	1	1
dnaX	dnaX	DNA polymerase III subunits gamma and tau;DNA polymerase III subunit gamma/tau	568	569	1.00176	1	3929	609	1929	1923.4	1	1	1	1	1	1	1	1	1	1	1	1	1	1	1	1	1	1	1	1	1	1	1	1	1	1	1	1	1	1	1	1	1	1	1	1	1	1	1
osmC	osmC	Organic hydroperoxide reductase OsmC/OhrA;OsmC family peroxiredoxin	568	568	1	1	3928	351	432	431.857	1	1	1	1	1	1	1	1	1	1	1	1	1	1	1	1	1	1	1	1	1	1	1	1	1	1	1	1	1	1	1	1	1	1	1	1	1	1	1
yhiN	yhiN	NAD(P)/FAD-dependent oxidoreductase;Membrane protein;putative flavoprotein YhiN	568	569	1.00176	1	3927	213	1197	1194.68	1	1	1	1	1	1	1	1	1	1	1	1	1	1	1	1	1	1	1	1	1	1	1	1	1	1	1	1	1	1	1	1	1	1	1	1	1	1	1
wzzfepE	wzz(fepE)	LPS O-antigen length regulator Wzz(fepE)	568	568	1	1	3926	1035	1137	1136.82	1	1	1	1	1	1	1	1	1	1	1	1	1	1	1	1	1	1	1	1	1	1	1	1	1	1	1	1	1	1	1	1	1	1	1	1	1	1	1
tcuC	tcuC	hypothetical protein;Citrate-proton symporter;tricarballylate/proton symporter TcuC	568	569	1.00176	1	3925	267	1305	1302.76	1	1	1	1	1	1	1	1	1	1	1	1	1	1	1	1	1	1	1	1	1	1	1	1	1	1	1	1	1	1	1	1	1	1	1	1	1	1	1
yjdN	yjdN	PhnB protein;hypothetical protein;VOC family metalloprotein YjdN	568	569	1.00176	1	3924	219	444	443.304	1	1	1	1	1	1	1	1	1	1	1	1	1	1	1	1	1	1	1	1	1	1	1	1	1	1	1	1	1	1	1	1	1	1	1	1	1	1	1
proP	proP	glycine betaine/L-proline transporter ProP	568	568	1	1	3923	1461	1503	1502.93	1	1	1	1	1	1	1	1	1	1	1	1	1	1	1	1	1	1	1	1	1	1	1	1	1	1	1	1	1	1	1	1	1	1	1	1	1	1	1
rstA	rstA	two-component system response regulator RstA	568	568	1	1	3922	714	732	731.968	1	1	1	1	1	1	1	1	1	1	1	1	1	1	1	1	1	1	1	1	1	1	1	1	1	1	1	1	1	1	1	1	1	1	1	1	1	1	1
group_1420	yccC	Inner membrane protein;putative membrane protein YccC	568	568	1	1	3921	741	1059	1058.44	1	1	1	1	1	1	1	1	1	1	1	1	1	1	1	1	1	1	1	1	1	1	1	1	1	1	1	1	1	1	1	1	1	1	1	1	1	1	1
hdfR	hdfR	HTH-type transcriptional regulator HdfR	568	568	1	1	3920	561	837	836.403	1	1	1	1	1	1	1	1	1	1	1	1	1	1	1	1	1	1	1	1	1	1	1	1	1	1	1	1	1	1	1	1	1	1	1	1	1	1	1
dinG	dinG	ATP-dependent helicase;ATP-binding protein;hypothetical protein;Rad3-related DNA helicase DinG;Putative ATP-binding protein	568	571	1.00528	1	3916	312	1911	1900.27	1	1	1	1	1	1	1	1	1	1	1	1	1	1	1	1	1	1	1	1	1	1	1	1	1	1	1	1	1	1	1	1	1	1	1	1	1	1	1
group_1418		glycoside-pentoside-hexuronide (GPH):cation symporter;Uncharacterized symporter yihO;glycoside-pentoside-hexuronide family transporter	568	569	1.00176	1	3915	627	1383	1380.64	1	1	1	1	1	1	1	1	1	1	1	1	1	1	1	1	1	1	1	1	1	1	1	1	1	1	1	1	1	1	1	1	1	1	1	1	1	1	1
dsbD	dsbD	hypothetical protein;Thiol:disulfide interchange protein;Thiol:disulfide interchange protein DsbD	568	570	1.00352	1	3913	150	1704	1696.83	1	1	1	1	1	1	1	1	1	1	1	1	1	1	1	1	1	1	1	1	1	1	1	1	1	1	1	1	1	1	1	1	1	1	1	1	1	1	1
group_1416	dcuA	Anaerobic C4-dicarboxylate transporter DcuA;Anaerobic C4-dicarboxylate transporter;anaerobic C4-dicarboxylate transporter DcuA;C4-dicarboxylate transporter	568	573	1.0088	1	3912	240	1368	1290.55	1	1	1	1	1	1	1	1	1	1	1	1	1	1	1	1	1	1	1	1	1	1	1	1	1	1	1	1	1	1	1	1	1	1	1	1	1	1	1
group_1414		YjeJ-like;Inner membrane protein	568	568	1	1	3907	840	858	857.968	1	1	1	1	1	1	1	1	1	1	1	1	1	1	1	1	1	1	1	1	1	1	1	1	1	1	1	1	1	1	1	1	1	1	1	1	1	1	1
group_1413		Inner membrane protein;HEPN-STY4199 domain-containing protein	568	569	1.00176	1	3906	327	1590	1587.2	1	1	1	1	1	1	1	1	1	1	1	1	1	1	1	1	1	1	1	1	1	1	1	1	1	1	1	1	1	1	1	1	1	1	1	1	1	1	1
bepA	bepA	Beta-barrel assembly-enhancing protease;Exported zinc metalloprotease YfgC;beta-barrel assembly-enhancing protease	568	569	1.00176	1	3904	294	1464	1461.43	1	1	1	1	1	1	1	1	1	1	1	1	1	1	1	1	1	1	1	1	1	1	1	1	1	1	1	1	1	1	1	1	1	1	1	1	1	1	1
group_1412		Putative membrane protein;Inner membrane protein	568	568	1	1	3903	426	516	514.415	1	1	1	1	1	1	1	1	1	1	1	1	1	1	1	1	1	1	1	1	1	1	1	1	1	1	1	1	1	1	1	1	1	1	1	1	1	1	1
ssaL	ssaL	SepL/TyeA/HrpJ family type III secretion system protein;SPI-2 type III secretion system apparatus protein SsaL	568	568	1	1	3900	900	1017	992.921	1	1	1	1	1	1	1	1	1	1	1	1	1	1	1	1	1	1	1	1	1	1	1	1	1	1	1	1	1	1	1	1	1	1	1	1	1	1	1
mdtG	mdtG	MFS transporter;Membrane transport protein;multidrug efflux MFS transporter MdtG	568	569	1.00176	1	3899	309	1215	1212.82	1	1	1	1	1	1	1	1	1	1	1	1	1	1	1	1	1	1	1	1	1	1	1	1	1	1	1	1	1	1	1	1	1	1	1	1	1	1	1
group_1409	dadA	Putative oxidoreductase;Glycine/D-amino acid oxidase (deaminating)	568	569	1.00176	1	3898	339	1302	1299.45	1	1	1	1	1	1	1	1	1	1	1	1	1	1	1	1	1	1	1	1	1	1	1	1	1	1	1	1	1	1	1	1	1	1	1	1	1	1	1
ssaN	ssaN	EscN/YscN/HrcN family type III secretion system ATPase;Type III secretion system ATPase;SctN family type III secretion system ATPase SsaN	568	569	1.00176	1	3896	468	1302	1299.71	1	1	1	1	1	1	1	1	1	1	1	1	1	1	1	1	1	1	1	1	1	1	1	1	1	1	1	1	1	1	1	1	1	1	1	1	1	1	1
livK	livK	Leucine-specific binding protein;Leu/Ile/Val/Thr-binding protein;high-affinity branched-chain amino acid ABC transporter substrate-binding protein LivK	568	583	1.02641	1	3893	408	1110	1081.36	1	1	1	1	1	1	1	1	1	1	1	1	1	1	1	1	1	1	1	1	1	1	1	1	1	1	1	1	1	1	1	1	1	1	1	1	1	1	1
group_1406		Transporter;hypothetical protein;MFS transporter;Shikimate transporter;MFS domain-containing protein	568	579	1.01937	1	3892	450	1302	1277.12	1	1	1	1	1	1	1	1	1	1	1	1	1	1	1	1	1	1	1	1	1	1	1	1	1	1	1	1	1	1	1	1	1	1	1	1	1	1	1
cdaR	cdaR	Carbohydrate diacid regulon transcriptional regulator CdaR;DNA-binding transcriptional regulator CdaR	568	568	1	1	3891	813	1158	1157.39	1	1	1	1	1	1	1	1	1	1	1	1	1	1	1	1	1	1	1	1	1	1	1	1	1	1	1	1	1	1	1	1	1	1	1	1	1	1	1
sbmC	sbmC	AraC family transcriptional regulator;GyrI-like domain-containing protein;DNA gyrase inhibitor GyrI/SbmC	568	570	1.00352	1	3888	363	867	863.911	1	1	1	1	1	1	1	1	1	1	1	1	1	1	1	1	1	1	1	1	1	1	1	1	1	1	1	1	1	1	1	1	1	1	1	1	1	1	1
group_1404		aldo/keto reductase;General stress protein 69;Aldo-keto reductase family 1 member C1-like protein -alpha-hydroxysteroid dehydrogenase 20-alpha-HSDDihydrodiol dehydrogenase 1 DD-1 DD1	568	569	1.00176	1	3887	384	1056	1054.09	1	1	1	1	1	1	1	1	1	1	1	1	1	1	1	1	1	1	1	1	1	1	1	1	1	1	1	1	1	1	1	1	1	1	1	1	1	1	1
rlmM	rlmM	hypothetical protein;23S rRNA (cytidine(2498)-2'-O)-methyltransferase RlmM	568	569	1.00176	1	3886	105	1101	1098.88	1	1	1	1	1	1	1	1	1	1	1	1	1	1	1	1	1	1	1	1	1	1	1	1	1	1	1	1	1	1	1	1	1	1	1	1	1	1	1
group_1401		hypothetical protein;Inner membrane protein	568	568	1	1	3883	405	474	473.879	1	1	1	1	1	1	1	1	1	1	1	1	1	1	1	1	1	1	1	1	1	1	1	1	1	1	1	1	1	1	1	1	1	1	1	1	1	1	1
msyB	msyB	Heat shock domain protein;Positive regulator for sigma H;acidic protein MsyB	568	571	1.00528	1	3881	189	714	709.555	1	1	1	1	1	1	1	1	1	1	1	1	1	1	1	1	1	1	1	1	1	1	1	1	1	1	1	1	1	1	1	1	1	1	1	1	1	1	1
prkB	prkB	phosphoribulokinase	568	568	1	1	3879	870	918	870.085	1	1	1	1	1	1	1	1	1	1	1	1	1	1	1	1	1	1	1	1	1	1	1	1	1	1	1	1	1	1	1	1	1	1	1	1	1	1	1
pagN	pagN	hypothetical protein;adhesin/invasin protein PagN	568	569	1.00176	1	3876	228	720	718.787	1	1	1	1	1	1	1	1	1	1	1	1	1	1	1	1	1	1	1	1	1	1	1	1	1	1	1	1	1	1	1	1	1	1	1	1	1	1	1
fadH~~~nemA	fadH;nemA	N-ethylmaleimide reductase;alkene reductase	568	568	1	1	3875	807	1755	1098.53	1	1	1	1	1	1	1	1	1	1	1	1	1	1	1	1	1	1	1	1	1	1	1	1	1	1	1	1	1	1	1	1	1	1	1	1	1	1	1
yjbH	yjbH	YjbH domain-containing protein;Lipoprotein;Uncharacterized lipoprotein YjbH	568	569	1.00176	1	3874	969	2097	2093.02	1	1	1	1	1	1	1	1	1	1	1	1	1	1	1	1	1	1	1	1	1	1	1	1	1	1	1	1	1	1	1	1	1	1	1	1	1	1	1
tdh~~~ybdR	tdh;ybdR	glutathione-dependent formaldehyde dehydrogenase;alcohol dehydrogenase catalytic domain-containing protein;putative zinc-type alcohol dehydrogenase-like protein YbdR	568	569	1.00176	1	3873	429	1239	1237.36	1	1	1	1	1	1	1	1	1	1	1	1	1	1	1	1	1	1	1	1	1	1	1	1	1	1	1	1	1	1	1	1	1	1	1	1	1	1	1
rna	rna	Ribonuclease I;ribonuclease I	568	571	1.00528	1	3872	297	807	802.692	1	1	1	1	1	1	1	1	1	1	1	1	1	1	1	1	1	1	1	1	1	1	1	1	1	1	1	1	1	1	1	1	1	1	1	1	1	1	1
hpaC	hpaC	4-hydroxyphenylacetate 3-monooxygenase reductase subunit;4-hydroxyphenylacetate 3-monooxygenase coupling protein	568	569	1.00176	1	3871	219	513	512.056	1	1	1	1	1	1	1	1	1	1	1	1	1	1	1	1	1	1	1	1	1	1	1	1	1	1	1	1	1	1	1	1	1	1	1	1	1	1	1
glcD	glcD	Glycolate dehydrogenase;FAD/FMN-containing lactate dehydrogenase/glycolate oxidase	568	568	1	1	3870	2196	3057	3055.48	1	1	1	1	1	1	1	1	1	1	1	1	1	1	1	1	1	1	1	1	1	1	1	1	1	1	1	1	1	1	1	1	1	1	1	1	1	1	1
nrdE	nrdE	class 1b ribonucleoside-diphosphate reductase subunit alpha	568	568	1	1	3869	2025	2118	2117.84	1	1	1	1	1	1	1	1	1	1	1	1	1	1	1	1	1	1	1	1	1	1	1	1	1	1	1	1	1	1	1	1	1	1	1	1	1	1	1
vgrG	vgrG	hypothetical protein;type VI secretion system tip protein VgrG;type VI secretion system Vgr family protein;type VI secretion protein Vgr	568	571	1.00528	1	3868	300	2190	2178.36	1	1	1	1	1	1	1	1	1	1	1	1	1	1	1	1	1	1	1	1	1	1	1	1	1	1	1	1	1	1	1	1	1	1	1	1	1	1	1
sufS	sufS	Bifunctional cysteine desulfurase/selenocysteine lyase;Cysteine desulfurase;cysteine desulfurase SufS	568	569	1.00176	1	3867	486	1221	1218.69	1	1	1	1	1	1	1	1	1	1	1	1	1	1	1	1	1	1	1	1	1	1	1	1	1	1	1	1	1	1	1	1	1	1	1	1	1	1	1
sseK2	sseK2	T3SS effector NleB;NleB1;Phage protein;type III secretion system effector arginine glycosyltransferase SseK2	568	569	1.00176	1	3866	504	1008	1002.93	1	1	1	1	1	1	1	1	1	1	1	1	1	1	1	1	1	1	1	1	1	1	1	1	1	1	1	1	1	1	1	1	1	1	1	1	1	1	1
ycxB	ycxB	hypothetical protein;YcxB domain-containing protein	568	568	1	1	3864	246	477	475.78	1	1	1	1	1	1	1	1	1	1	1	1	1	1	1	1	1	1	1	1	1	1	1	1	1	1	1	1	1	1	1	1	1	1	1	1	1	1	1
cpdA	cpdA	3'5'-cyclic-AMP phosphodiesterase	568	569	1.00176	1	3863	390	828	825.448	1	1	1	1	1	1	1	1	1	1	1	1	1	1	1	1	1	1	1	1	1	1	1	1	1	1	1	1	1	1	1	1	1	1	1	1	1	1	1
zapE	zapE	cell division protein ZapE	568	568	1	1	3860	888	1125	1124.58	1	1	1	1	1	1	1	1	1	1	1	1	1	1	1	1	1	1	1	1	1	1	1	1	1	1	1	1	1	1	1	1	1	1	1	1	1	1	1
rclR	rclR	reactive chlorine-specific transcriptional regulator RclR;AraC family transcriptional regulator;hypothetical protein;cupin domain-containing protein	568	570	1.00352	1	3858	123	891	833.658	1	1	1	1	1	1	1	1	1	1	1	1	1	1	1	1	1	1	1	1	1	1	1	1	1	1	1	1	1	1	1	1	1	1	1	1	1	1	1
group_1394	yadH;	ABC-2 family transporter protein;Inner membrane transport permease YhhJputative;ABC-type multidrug transport system permease component	568	569	1.00176	1	3857	462	1125	1122.97	1	1	1	1	1	1	1	1	1	1	1	1	1	1	1	1	1	1	1	1	1	1	1	1	1	1	1	1	1	1	1	1	1	1	1	1	1	1	1
mnmG	mnmG	tRNA uridine-5-carboxymethylaminomethyl(34) synthesis enzyme MnmG	568	569	1.00176	1	3856	909	1890	1886.66	1	1	1	1	1	1	1	1	1	1	1	1	1	1	1	1	1	1	1	1	1	1	1	1	1	1	1	1	1	1	1	1	1	1	1	1	1	1	1
invC	invC	Secretory apparatus ATP synthase (Associated with virulence);SctN family type III secretion system ATPase InvC	568	568	1	1	3855	201	1296	1294.07	1	1	1	1	1	1	1	1	1	1	1	1	1	1	1	1	1	1	1	1	1	1	1	1	1	1	1	1	1	1	1	1	1	1	1	1	1	1	1
wza	wza	Polysaccharide export protein;Putative polysaccharide export protein wza	568	568	1	1	3853	660	1140	1139.15	1	1	1	1	1	1	1	1	1	1	1	1	1	1	1	1	1	1	1	1	1	1	1	1	1	1	1	1	1	1	1	1	1	1	1	1	1	1	1
group_1391	argF	ornithine carbamoyltransferase	568	568	1	1	3851	936	1005	1004.88	1	1	1	1	1	1	1	1	1	1	1	1	1	1	1	1	1	1	1	1	1	1	1	1	1	1	1	1	1	1	1	1	1	1	1	1	1	1	1
lysR~~~tcuR	lysR;tcuR	TcuR;LysR family transcriptional regulator;tricarballylate utilization LysR family transcriptional regulator TcuR	568	570	1.00352	1	3850	357	927	923.611	1	1	1	1	1	1	1	1	1	1	1	1	1	1	1	1	1	1	1	1	1	1	1	1	1	1	1	1	1	1	1	1	1	1	1	1	1	1	1
sfsA	sfsA	DNA/RNA nuclease SfsA	568	569	1.00176	1	3849	213	705	703.761	1	1	1	1	1	1	1	1	1	1	1	1	1	1	1	1	1	1	1	1	1	1	1	1	1	1	1	1	1	1	1	1	1	1	1	1	1	1	1
ackA	ackA	Acetate kinase;acetate kinase	568	569	1.00176	1	3846	465	1203	1200.88	1	1	1	1	1	1	1	1	1	1	1	1	1	1	1	1	1	1	1	1	1	1	1	1	1	1	1	1	1	1	1	1	1	1	1	1	1	1	1
asnA	asnA	aspartate--ammonia ligase;Asparagine synthetase AsnA	568	569	1.00176	1	3844	270	999	997.097	1	1	1	1	1	1	1	1	1	1	1	1	1	1	1	1	1	1	1	1	1	1	1	1	1	1	1	1	1	1	1	1	1	1	1	1	1	1	1
helD	helD	DNA helicase IV	568	568	1	1	3843	1986	2061	2060.21	1	1	1	1	1	1	1	1	1	1	1	1	1	1	1	1	1	1	1	1	1	1	1	1	1	1	1	1	1	1	1	1	1	1	1	1	1	1	1
dLH	dLH	dienelactone hydrolase;Dienelactone hydrolase	568	568	1	1	3841	528	675	528.259	1	1	1	1	1	1	1	1	1	1	1	1	1	1	1	1	1	1	1	1	1	1	1	1	1	1	1	1	1	1	1	1	1	1	1	1	1	1	1
group_1386	relE	RelE toxin;mRNA-degrading endonuclease RelE toxin component of the RelBE toxin-antitoxin system	568	568	1	1	3838	195	285	284.842	1	1	1	1	1	1	1	1	1	1	1	1	1	1	1	1	1	1	1	1	1	1	1	1	1	1	1	1	1	1	1	1	1	1	1	1	1	1	1
group_1385		DUF4862 domain-containing protein;YiaX1	568	570	1.00352	1	3836	366	942	938.684	1	1	1	1	1	1	1	1	1	1	1	1	1	1	1	1	1	1	1	1	1	1	1	1	1	1	1	1	1	1	1	1	1	1	1	1	1	1	1
group_1384	cadC1	hypothetical protein;transcriptional regulator;DNA-binding winged helix-turn-helix (wHTH) domain	568	568	1	1	3835	336	858	856.431	1	1	1	1	1	1	1	1	1	1	1	1	1	1	1	1	1	1	1	1	1	1	1	1	1	1	1	1	1	1	1	1	1	1	1	1	1	1	1
group_1383	mrdA	Penicillin-binding protein 2;penicillin-binding protein 2;peptidoglycan DD-transpeptidase MrdA	568	569	1.00176	1	3834	831	1902	1898.85	1	1	1	1	1	1	1	1	1	1	1	1	1	1	1	1	1	1	1	1	1	1	1	1	1	1	1	1	1	1	1	1	1	1	1	1	1	1	1
fliK	fliK	flagellar hook-length control protein FliK;flagellar hook length control protein FliK	568	568	1	1	3833	498	1224	1220.43	1	1	1	1	1	1	1	1	1	1	1	1	1	1	1	1	1	1	1	1	1	1	1	1	1	1	1	1	1	1	1	1	1	1	1	1	1	1	1
corC	corC	CNNM family magnesium/cobalt transport protein CorC;Magnesium and cobalt efflux protein	568	569	1.00176	1	3830	150	879	877.355	1	1	1	1	1	1	1	1	1	1	1	1	1	1	1	1	1	1	1	1	1	1	1	1	1	1	1	1	1	1	1	1	1	1	1	1	1	1	1
ybeZ	ybeZ	PhoH family protein;PhoH-like protein	568	569	1.00176	1	3829	198	1047	1045.12	1	1	1	1	1	1	1	1	1	1	1	1	1	1	1	1	1	1	1	1	1	1	1	1	1	1	1	1	1	1	1	1	1	1	1	1	1	1	1
arsB	arsB	anion transporter;Na+/H+ antiporter NhaD or related arsenite permease	568	568	1	1	3828	1113	1239	1113.89	1	1	1	1	1	1	1	1	1	1	1	1	1	1	1	1	1	1	1	1	1	1	1	1	1	1	1	1	1	1	1	1	1	1	1	1	1	1	1
wcaI	wcaI	Glycosyltransferase;colanic acid biosynthesis fucosyltransferase WcaI	568	569	1.00176	1	3827	573	1224	1221.85	1	1	1	1	1	1	1	1	1	1	1	1	1	1	1	1	1	1	1	1	1	1	1	1	1	1	1	1	1	1	1	1	1	1	1	1	1	1	1
dprA	dprA	DNA protecting protein DprA;DNA-protecting protein DprA	568	572	1.00704	1	3826	492	1125	1116.8	1	1	1	1	1	1	1	1	1	1	1	1	1	1	1	1	1	1	1	1	1	1	1	1	1	1	1	1	1	1	1	1	1	1	1	1	1	1	1
yhgF	yhgF	hypothetical protein;Protein YhgF	568	568	1	1	3825	501	2331	2324.56	1	1	1	1	1	1	1	1	1	1	1	1	1	1	1	1	1	1	1	1	1	1	1	1	1	1	1	1	1	1	1	1	1	1	1	1	1	1	1
iclR~~~yiaJ	iclR;yiaJ	transcriptional regulator;IclR family transcriptional regulator;IclR family transcriptional regulator YiaJ	568	569	1.00176	1	3824	363	801	799.545	1	1	1	1	1	1	1	1	1	1	1	1	1	1	1	1	1	1	1	1	1	1	1	1	1	1	1	1	1	1	1	1	1	1	1	1	1	1	1
yiaN	yiaN	TRAP transporter large permease subunit;SLC13 family permease;23-diketo-L-gulonate transporter large permease YiaN	568	570	1.00352	1	3823	207	1278	1273.48	1	1	1	1	1	1	1	1	1	1	1	1	1	1	1	1	1	1	1	1	1	1	1	1	1	1	1	1	1	1	1	1	1	1	1	1	1	1	1
hutH	hutH	aromatic amino acid lyase;Histidine ammonia-lyase;histidine ammonia-lyase	568	569	1.00176	1	3822	264	1521	1518.15	1	1	1	1	1	1	1	1	1	1	1	1	1	1	1	1	1	1	1	1	1	1	1	1	1	1	1	1	1	1	1	1	1	1	1	1	1	1	1
potF	potF	Putrescine ABC transporter periplasmic-binding protein;Putrescine-binding periplasmic protein;spermidine/putrescine ABC transporter substrate-binding protein PotF	568	569	1.00176	1	3821	408	1116	1113.93	1	1	1	1	1	1	1	1	1	1	1	1	1	1	1	1	1	1	1	1	1	1	1	1	1	1	1	1	1	1	1	1	1	1	1	1	1	1	1
kefC	kefC	NAD-binding protein;cation:proton antiporter;glutathione-regulated potassium-efflux system protein KefC	568	569	1.00176	1	3820	798	1863	1859.7	1	1	1	1	1	1	1	1	1	1	1	1	1	1	1	1	1	1	1	1	1	1	1	1	1	1	1	1	1	1	1	1	1	1	1	1	1	1	1
rseB	rseB	hypothetical protein;sigma-E factor regulatory protein RseB	568	568	1	1	3819	795	957	956.715	1	1	1	1	1	1	1	1	1	1	1	1	1	1	1	1	1	1	1	1	1	1	1	1	1	1	1	1	1	1	1	1	1	1	1	1	1	1	1
truD	truD	tRNA pseudouridine(13) synthase TruD;tRNA pseudouridine 13 synthase	568	569	1.00176	1	3818	291	1050	1048.02	1	1	1	1	1	1	1	1	1	1	1	1	1	1	1	1	1	1	1	1	1	1	1	1	1	1	1	1	1	1	1	1	1	1	1	1	1	1	1
sseC	sseC	hypothetical protein;type III secretion system translocon protein	568	569	1.00176	1	3817	237	1455	1451.1	1	1	1	1	1	1	1	1	1	1	1	1	1	1	1	1	1	1	1	1	1	1	1	1	1	1	1	1	1	1	1	1	1	1	1	1	1	1	1
group_1381	sseB	SPI-2 type III secretion system translocon protein SseB	568	568	1	1	3816	441	591	590.736	1	1	1	1	1	1	1	1	1	1	1	1	1	1	1	1	1	1	1	1	1	1	1	1	1	1	1	1	1	1	1	1	1	1	1	1	1	1	1
pepA	pepA	leucyl aminopeptidase	568	569	1.00176	1	3815	204	1512	1509.28	1	1	1	1	1	1	1	1	1	1	1	1	1	1	1	1	1	1	1	1	1	1	1	1	1	1	1	1	1	1	1	1	1	1	1	1	1	1	1
dctP	dctP	hypothetical protein;C4-dicarboxylate ABC transporter substrate-binding protein;TRAP-type C4-dicarboxylate transport system periplasmic component	568	569	1.00176	1	3814	183	984	982.17	1	1	1	1	1	1	1	1	1	1	1	1	1	1	1	1	1	1	1	1	1	1	1	1	1	1	1	1	1	1	1	1	1	1	1	1	1	1	1
sTM0278	sTM0278	putative periplasmic protein;Putative periplasmic protein	568	568	1	1	3811	333	384	370.954	1	1	1	1	1	1	1	1	1	1	1	1	1	1	1	1	1	1	1	1	1	1	1	1	1	1	1	1	1	1	1	1	1	1	1	1	1	1	1
yqjK	yqjK	Uncharacterized protein YqjK;Inner membrane protein YqjK	568	568	1	1	3809	246	300	299.905	1	1	1	1	1	1	1	1	1	1	1	1	1	1	1	1	1	1	1	1	1	1	1	1	1	1	1	1	1	1	1	1	1	1	1	1	1	1	1
group_1376	wcaA	hypothetical protein;colanic acid biosynthesis glycosyltransferase WcaA	568	570	1.00352	1	3806	228	912	908.737	1	1	1	1	1	1	1	1	1	1	1	1	1	1	1	1	1	1	1	1	1	1	1	1	1	1	1	1	1	1	1	1	1	1	1	1	1	1	1
purF	purF	amidophosphoribosyltransferase	568	568	1	1	3805	1365	1518	1517.73	1	1	1	1	1	1	1	1	1	1	1	1	1	1	1	1	1	1	1	1	1	1	1	1	1	1	1	1	1	1	1	1	1	1	1	1	1	1	1
group_1375	hybD	HyaD/HybD family hydrogenase maturation endopeptidase;Hydrogenase 2 maturation protease;hydrogenase maturation protease	568	570	1.00352	1	3804	156	495	493.242	1	1	1	1	1	1	1	1	1	1	1	1	1	1	1	1	1	1	1	1	1	1	1	1	1	1	1	1	1	1	1	1	1	1	1	1	1	1	1
group_1374		hypothetical protein;Conserved domain protein	568	568	1	1	3803	132	135	132.005	1	1	1	1	1	1	1	1	1	1	1	1	1	1	1	1	1	1	1	1	1	1	1	1	1	1	1	1	1	1	1	1	1	1	1	1	1	1	1
spaS	spaS	Virulence associated secretory protein;Surface presentation of antigens protein SpaS domain protein;SPI-1 type III secretion system export apparatus protein SpaS	568	569	1.00176	1	3801	492	1071	1069.22	1	1	1	1	1	1	1	1	1	1	1	1	1	1	1	1	1	1	1	1	1	1	1	1	1	1	1	1	1	1	1	1	1	1	1	1	1	1	1
rlmG	rlmG	50S rRNA methyltransferase;methyltransferase;23S rRNA (guanine(1835)-N(2))-methyltransferase RlmG	568	569	1.00176	1	3800	477	1137	1134.76	1	1	1	1	1	1	1	1	1	1	1	1	1	1	1	1	1	1	1	1	1	1	1	1	1	1	1	1	1	1	1	1	1	1	1	1	1	1	1
nuoC	nuoC	NADH-quinone oxidoreductase subunit C/D	568	569	1.00176	1	3799	306	1803	1799.78	1	1	1	1	1	1	1	1	1	1	1	1	1	1	1	1	1	1	1	1	1	1	1	1	1	1	1	1	1	1	1	1	1	1	1	1	1	1	1
group_1373		fimbrial protein;Fimbrial subunit	568	568	1	1	3798	414	486	485.873	1	1	1	1	1	1	1	1	1	1	1	1	1	1	1	1	1	1	1	1	1	1	1	1	1	1	1	1	1	1	1	1	1	1	1	1	1	1	1
rpiB	rpiB	RpiB/LacA/LacB family sugar-phosphate isomerase;Ribose 5-phosphate isomerase RpiB	568	568	1	1	3797	462	639	638.688	1	1	1	1	1	1	1	1	1	1	1	1	1	1	1	1	1	1	1	1	1	1	1	1	1	1	1	1	1	1	1	1	1	1	1	1	1	1	1
ubiT	ubiT	Lipid carrier protein;Ubiquinone biosynthesis accessory factor UbiT lipid carrier SCP2 domain	568	569	1.00176	1	3796	144	525	524.062	1	1	1	1	1	1	1	1	1	1	1	1	1	1	1	1	1	1	1	1	1	1	1	1	1	1	1	1	1	1	1	1	1	1	1	1	1	1	1
group_1372	ompA	Outer membrane protein A;porin OmpA	568	568	1	1	3795	522	1062	1061.05	1	1	1	1	1	1	1	1	1	1	1	1	1	1	1	1	1	1	1	1	1	1	1	1	1	1	1	1	1	1	1	1	1	1	1	1	1	1	1
stfD	stfD	fimbrial chaperone StfD;hypothetical protein	568	579	1.01937	1	3792	183	753	738.694	1	1	1	1	1	1	1	1	1	1	1	1	1	1	1	1	1	1	1	1	1	1	1	1	1	1	1	1	1	1	1	1	1	1	1	1	1	1	1
yajO	yajO	Oxidoreductase;1-deoxyxylulose-5-phosphate synthase YajO	568	569	1.00176	1	3791	273	975	973.228	1	1	1	1	1	1	1	1	1	1	1	1	1	1	1	1	1	1	1	1	1	1	1	1	1	1	1	1	1	1	1	1	1	1	1	1	1	1	1
fimZ	fimZ	fimbria biosynthesis transcriptional regulator FimZ;DNA-binding response regulator;response regulator	568	569	1.00176	1	3790	225	633	631.576	1	1	1	1	1	1	1	1	1	1	1	1	1	1	1	1	1	1	1	1	1	1	1	1	1	1	1	1	1	1	1	1	1	1	1	1	1	1	1
group_1369		NlpC/P60 domain-containing protein;NLPC-P60 domain-containing protein	568	568	1	1	3789	369	369	369	1	1	1	1	1	1	1	1	1	1	1	1	1	1	1	1	1	1	1	1	1	1	1	1	1	1	1	1	1	1	1	1	1	1	1	1	1	1	1
yhbP	yhbP	UPF0306 protein;YhbP family protein	568	568	1	1	3788	342	444	443.82	1	1	1	1	1	1	1	1	1	1	1	1	1	1	1	1	1	1	1	1	1	1	1	1	1	1	1	1	1	1	1	1	1	1	1	1	1	1	1
ydhK	ydhK	Fusaric acid resistance protein;FUSC family protein;putative transporter YdhK	568	569	1.00176	1	3787	687	2040	2036.35	1	1	1	1	1	1	1	1	1	1	1	1	1	1	1	1	1	1	1	1	1	1	1	1	1	1	1	1	1	1	1	1	1	1	1	1	1	1	1
dgcJ	dgcJ	Putative two-component response regulator and GGDEF family protein YeaJ;diguanylate cyclase DgcJ;diguanylate cyclase	568	568	1	1	3785	636	1494	1480.63	1	1	1	1	1	1	1	1	1	1	1	1	1	1	1	1	1	1	1	1	1	1	1	1	1	1	1	1	1	1	1	1	1	1	1	1	1	1	1
group_1368	aslA	phosphatase;Arylsulfatase A or related enzyme AlkP superfamily	568	568	1	1	3784	1800	1890	1887.15	1	1	1	1	1	1	1	1	1	1	1	1	1	1	1	1	1	1	1	1	1	1	1	1	1	1	1	1	1	1	1	1	1	1	1	1	1	1	1
yadU	yadU	DUF2544 domain-containing protein;hypothetical protein;putative protein YadU	568	569	1.00176	1	3783	234	843	841.561	1	1	1	1	1	1	1	1	1	1	1	1	1	1	1	1	1	1	1	1	1	1	1	1	1	1	1	1	1	1	1	1	1	1	1	1	1	1	1
group_1367		SAM-dependent methyltransferase;Methyltransferase type 12	568	568	1	1	3782	642	717	663.058	1	1	1	1	1	1	1	1	1	1	1	1	1	1	1	1	1	1	1	1	1	1	1	1	1	1	1	1	1	1	1	1	1	1	1	1	1	1	1
group_1366	emrA	biotin/lipoyl-binding protein;Multidrug resistance secretion protein;multidrug efflux MFS transporter periplasmic adaptor subunit EmrA	568	582	1.02465	1	3781	555	1173	1144.71	1	1	1	1	1	1	1	1	1	1	1	1	1	1	1	1	1	1	1	1	1	1	1	1	1	1	1	1	1	1	1	1	1	1	1	1	1	1	1
mutH	mutH	DNA mismatch repair protein MutH;DNA mismatch repair protein;DNA mismatch repair endonuclease MutH;Methyl-directed mismatch repair protein	568	571	1.00528	1	3780	213	744	692.002	1	1	1	1	1	1	1	1	1	1	1	1	1	1	1	1	1	1	1	1	1	1	1	1	1	1	1	1	1	1	1	1	1	1	1	1	1	1	1
ptsP	ptsP	hypothetical protein;phosphoenolpyruvate--protein phosphotransferase;Phosphocarrier protein kinase/phosphorylase	568	571	1.00528	1	3779	624	2460	2235.29	1	1	1	1	1	1	1	1	1	1	1	1	1	1	1	1	1	1	1	1	1	1	1	1	1	1	1	1	1	1	1	1	1	1	1	1	1	1	1
group_1365		LydA holin phage holin superfamily III;Bacteriophage protein	568	568	1	1	3778	303	345	344.926	1	1	1	1	1	1	1	1	1	1	1	1	1	1	1	1	1	1	1	1	1	1	1	1	1	1	1	1	1	1	1	1	1	1	1	1	1	1	1
group_1364	cadC1	DNA-binding winged helix-turn-helix (wHTH) domain	568	568	1	1	3777	444	483	444.069	1	1	1	1	1	1	1	1	1	1	1	1	1	1	1	1	1	1	1	1	1	1	1	1	1	1	1	1	1	1	1	1	1	1	1	1	1	1	1
gcd	gcd	Glucose dehydrogenase PQQ-dependent;Quinoprotein glucose dehydrogenase	568	568	1	1	3775	2196	2391	2390.66	1	1	1	1	1	1	1	1	1	1	1	1	1	1	1	1	1	1	1	1	1	1	1	1	1	1	1	1	1	1	1	1	1	1	1	1	1	1	1
rluF	rluF	23S rRNA pseudouridine(2604) synthase RluF	568	568	1	1	3774	804	870	869.884	1	1	1	1	1	1	1	1	1	1	1	1	1	1	1	1	1	1	1	1	1	1	1	1	1	1	1	1	1	1	1	1	1	1	1	1	1	1	1
ndh	ndh	FAD-dependent oxidoreductase;NADH-quinone dehydrogenase	568	568	1	1	3773	1158	1305	1304.62	1	1	1	1	1	1	1	1	1	1	1	1	1	1	1	1	1	1	1	1	1	1	1	1	1	1	1	1	1	1	1	1	1	1	1	1	1	1	1
tssH	tssH	ClpB-like protein;AAA family ATPase;type VI secretion system ATPase TssH;hypothetical protein;ClpV1 family T6SS ATPase	568	573	1.0088	1	3772	621	2640	2616.53	1	1	1	1	1	1	1	1	1	1	1	1	1	1	1	1	1	1	1	1	1	1	1	1	1	1	1	1	1	1	1	1	1	1	1	1	1	1	1
pgm	pgm	phosphoglucomutase (alpha-D-glucose-16-bisphosphate-dependent)	568	568	1	1	3771	1629	1641	1640.98	1	1	1	1	1	1	1	1	1	1	1	1	1	1	1	1	1	1	1	1	1	1	1	1	1	1	1	1	1	1	1	1	1	1	1	1	1	1	1
nuoJ	nuoJ	NADH-quinone oxidoreductase subunit J	568	568	1	1	3770	555	669	555.201	1	1	1	1	1	1	1	1	1	1	1	1	1	1	1	1	1	1	1	1	1	1	1	1	1	1	1	1	1	1	1	1	1	1	1	1	1	1	1
hycE	hycE	Formate hydrogenlyase subunit 5;formate hydrogenlyase subunit HycE	568	568	1	1	3769	1053	1710	1708.84	1	1	1	1	1	1	1	1	1	1	1	1	1	1	1	1	1	1	1	1	1	1	1	1	1	1	1	1	1	1	1	1	1	1	1	1	1	1	1
group_1362	hisJ	arginine ABC transporter substrate-binding protein;ABC-type amino acid transport/signal transduction system periplasmic component/domain;Arginine ABC transporter substrate-binding protein	568	568	1	1	3768	693	741	740.636	1	1	1	1	1	1	1	1	1	1	1	1	1	1	1	1	1	1	1	1	1	1	1	1	1	1	1	1	1	1	1	1	1	1	1	1	1	1	1
yaiI	yaiI	UPF0178 protein YaiI;YaiI/YqxD family protein	568	568	1	1	3767	426	519	456.227	1	1	1	1	1	1	1	1	1	1	1	1	1	1	1	1	1	1	1	1	1	1	1	1	1	1	1	1	1	1	1	1	1	1	1	1	1	1	1
pstS	pstS	Membrane protein ATP binding protein of ABC transporter;Putative periplasmic phosphate-binding protein;Phosphate-binding protein;hypothetical protein;ABC-type phosphate transport system periplasmic component	568	571	1.00528	1	3766	375	1497	1489.06	1	1	1	1	1	1	1	1	1	1	1	1	1	1	1	1	1	1	1	1	1	1	1	1	1	1	1	1	1	1	1	1	1	1	1	1	1	1	1
group_1361	araC	helix-turn-helix domain-containing protein;Transcriptional regulator;AraC-type DNA-binding domain and AraC-containing proteins	568	568	1	1	3765	438	789	788.213	1	1	1	1	1	1	1	1	1	1	1	1	1	1	1	1	1	1	1	1	1	1	1	1	1	1	1	1	1	1	1	1	1	1	1	1	1	1	1
ybaN	ybaN	DUF454 domain-containing protein	568	568	1	1	3763	318	378	377.789	1	1	1	1	1	1	1	1	1	1	1	1	1	1	1	1	1	1	1	1	1	1	1	1	1	1	1	1	1	1	1	1	1	1	1	1	1	1	1
selD	selD	selenide water dikinase SelD	568	569	1.00176	1	3762	468	1044	1042.17	1	1	1	1	1	1	1	1	1	1	1	1	1	1	1	1	1	1	1	1	1	1	1	1	1	1	1	1	1	1	1	1	1	1	1	1	1	1	1
btuD	btuD	vitamin B12 ABC transporter ATP-binding protein BtuD	568	568	1	1	3761	615	750	749.762	1	1	1	1	1	1	1	1	1	1	1	1	1	1	1	1	1	1	1	1	1	1	1	1	1	1	1	1	1	1	1	1	1	1	1	1	1	1	1
group_1359		hypothetical protein;GDP-mannose 46-dehydratase	568	569	1.00176	1	3760	462	1122	1120.13	1	1	1	1	1	1	1	1	1	1	1	1	1	1	1	1	1	1	1	1	1	1	1	1	1	1	1	1	1	1	1	1	1	1	1	1	1	1	1
group_1358	purR	LacI family transcriptional regulator;DNA-binding transcriptional regulator LacI/PurR family	568	568	1	1	3759	798	1020	1019.61	1	1	1	1	1	1	1	1	1	1	1	1	1	1	1	1	1	1	1	1	1	1	1	1	1	1	1	1	1	1	1	1	1	1	1	1	1	1	1
araJ~~~yhhS	araJ;yhhS	Major facilitator superfamily protein;Major facilitator superfamily transporter;putative arabinose efflux permease AraJ MFS family;putative MFS-type transporter YhhS	568	569	1.00176	1	3758	285	1260	1252.61	1	1	1	1	1	1	1	1	1	1	1	1	1	1	1	1	1	1	1	1	1	1	1	1	1	1	1	1	1	1	1	1	1	1	1	1	1	1	1
mrcA	mrcA	peptidoglycan glycosyltransferase/peptidoglycan DD-transpeptidase MrcA;Penicillin-binding protein 1A	568	569	1.00176	1	3756	1020	2553	2548.22	1	1	1	1	1	1	1	1	1	1	1	1	1	1	1	1	1	1	1	1	1	1	1	1	1	1	1	1	1	1	1	1	1	1	1	1	1	1	1
nudI	nudI	nucleoside triphosphatase NudI	568	568	1	1	3755	363	426	425.889	1	1	1	1	1	1	1	1	1	1	1	1	1	1	1	1	1	1	1	1	1	1	1	1	1	1	1	1	1	1	1	1	1	1	1	1	1	1	1
yebS~~~pqiA	yebS;pqiA	membrane integrity lipid transport subunit YebS	568	568	1	1	3753	1197	1284	1283.78	1	1	1	1	1	1	1	1	1	1	1	1	1	1	1	1	1	1	1	1	1	1	1	1	1	1	1	1	1	1	1	1	1	1	1	1	1	1	1
lysP	lysP	Amino acid permease;amino acid permease	568	574	1.01056	1	3752	321	1407	1391.39	1	1	1	1	1	1	1	1	1	1	1	1	1	1	1	1	1	1	1	1	1	1	1	1	1	1	1	1	1	1	1	1	1	1	1	1	1	1	1
trhO	trhO	rhodanese-related sulfurtransferase;hypothetical protein;tRNA uridine(34) hydroxylase	568	573	1.0088	1	3750	174	1053	1042.35	1	1	1	1	1	1	1	1	1	1	1	1	1	1	1	1	1	1	1	1	1	1	1	1	1	1	1	1	1	1	1	1	1	1	1	1	1	1	1
yfeX	yfeX	Putative peroxidase;Dyp-type peroxidase;porphyrinogen peroxidase	568	569	1.00176	1	3749	192	900	898.16	1	1	1	1	1	1	1	1	1	1	1	1	1	1	1	1	1	1	1	1	1	1	1	1	1	1	1	1	1	1	1	1	1	1	1	1	1	1	1
group_1355		Putative fructose transport system kinase;Nucleoside triphosphate hydrolase domain-containing protein;nucleoside/nucleotide kinase family protein	568	569	1.00176	1	3748	297	717	715.724	1	1	1	1	1	1	1	1	1	1	1	1	1	1	1	1	1	1	1	1	1	1	1	1	1	1	1	1	1	1	1	1	1	1	1	1	1	1	1
glpX	glpX	class II fructose-bisphosphatase;Fructose-bisphosphatase	568	569	1.00176	1	3747	357	972	970.297	1	1	1	1	1	1	1	1	1	1	1	1	1	1	1	1	1	1	1	1	1	1	1	1	1	1	1	1	1	1	1	1	1	1	1	1	1	1	1
ecfT	ecfT	ABC-type cobalt transport system permease;Cobalt ABC transporter permease;ECF-type transporter transmembrane protein EcfT	568	569	1.00176	1	3745	267	711	709.803	1	1	1	1	1	1	1	1	1	1	1	1	1	1	1	1	1	1	1	1	1	1	1	1	1	1	1	1	1	1	1	1	1	1	1	1	1	1	1
group_1354	ahpC	hypothetical protein;Alkyl hydroperoxide reductase C;Alkyl hydroperoxide reductase subunit AhpC (peroxiredoxin)	568	569	1.00176	1	3744	126	603	601.935	1	1	1	1	1	1	1	1	1	1	1	1	1	1	1	1	1	1	1	1	1	1	1	1	1	1	1	1	1	1	1	1	1	1	1	1	1	1	1
rsxB	rsxB	Ferredoxin-like protein cytoplasmic membrane;RnfABCDGE type electron transport complex subunit B;electron transport complex subunit RsxB	568	569	1.00176	1	3742	249	579	577.993	1	1	1	1	1	1	1	1	1	1	1	1	1	1	1	1	1	1	1	1	1	1	1	1	1	1	1	1	1	1	1	1	1	1	1	1	1	1	1
fadD	fadD	hypothetical protein;AMP-binding protein;long-chain-fatty-acid--CoA ligase FadD	568	569	1.00176	1	3741	570	1752	1749.01	1	1	1	1	1	1	1	1	1	1	1	1	1	1	1	1	1	1	1	1	1	1	1	1	1	1	1	1	1	1	1	1	1	1	1	1	1	1	1
group_1353		fimbria/pilus outer membrane usher protein;fimbrial biogenesis outer membrane usher protein	568	570	1.00352	1	3740	1206	2646	2636.08	1	1	1	1	1	1	1	1	1	1	1	1	1	1	1	1	1	1	1	1	1	1	1	1	1	1	1	1	1	1	1	1	1	1	1	1	1	1	1
group_1351	tal	transaldolase B	568	568	1	1	3738	885	954	953.879	1	1	1	1	1	1	1	1	1	1	1	1	1	1	1	1	1	1	1	1	1	1	1	1	1	1	1	1	1	1	1	1	1	1	1	1	1	1	1
group_1350		Cyclic-di-GMP-binding biofilm dispersal mediator protein;hypothetical protein;Oxidoreductase	568	568	1	1	3737	291	762	711.106	1	1	1	1	1	1	1	1	1	1	1	1	1	1	1	1	1	1	1	1	1	1	1	1	1	1	1	1	1	1	1	1	1	1	1	1	1	1	1
yggU	yggU	DUF167 domain-containing protein;UPF0235 protein YggU	568	568	1	1	3736	291	303	291.042	1	1	1	1	1	1	1	1	1	1	1	1	1	1	1	1	1	1	1	1	1	1	1	1	1	1	1	1	1	1	1	1	1	1	1	1	1	1	1
group_1349		Mobile element protein;Integrase catalytic domain-containing protein	568	568	1	1	3735	231	273	272.882	1	1	1	1	1	1	1	1	1	1	1	1	1	1	1	1	1	1	1	1	1	1	1	1	1	1	1	1	1	1	1	1	1	1	1	1	1	1	1
stkG	stkG	Fimbrial protein;hypothetical protein;fimbrial protein StkG	568	571	1.00528	1	3734	453	1062	1056.27	1	1	1	1	1	1	1	1	1	1	1	1	1	1	1	1	1	1	1	1	1	1	1	1	1	1	1	1	1	1	1	1	1	1	1	1	1	1	1
msrP	msrP	protein-methionine-sulfoxide reductase catalytic subunit MsrP;Reductase	568	570	1.00352	1	3733	216	1005	1001.02	1	1	1	1	1	1	1	1	1	1	1	1	1	1	1	1	1	1	1	1	1	1	1	1	1	1	1	1	1	1	1	1	1	1	1	1	1	1	1
group_1348		Membrane protein;hypothetical protein;Inner membrane protein	568	569	1.00176	1	3732	171	561	560.019	1	1	1	1	1	1	1	1	1	1	1	1	1	1	1	1	1	1	1	1	1	1	1	1	1	1	1	1	1	1	1	1	1	1	1	1	1	1	1
htpG	htpG	molecular chaperone HtpG	568	569	1.00176	1	3731	783	1875	1871.67	1	1	1	1	1	1	1	1	1	1	1	1	1	1	1	1	1	1	1	1	1	1	1	1	1	1	1	1	1	1	1	1	1	1	1	1	1	1	1
hrpA	hrpA	ATP-dependent RNA helicase HrpA	568	569	1.00176	1	3730	1830	3921	3914.13	1	1	1	1	1	1	1	1	1	1	1	1	1	1	1	1	1	1	1	1	1	1	1	1	1	1	1	1	1	1	1	1	1	1	1	1	1	1	1
rarA	rarA	Holliday junction DNA helicase;replication-associated recombination protein RarA	568	569	1.00176	1	3729	594	1398	1341.9	1	1	1	1	1	1	1	1	1	1	1	1	1	1	1	1	1	1	1	1	1	1	1	1	1	1	1	1	1	1	1	1	1	1	1	1	1	1	1
wzzB	wzzB	O-antigen chain length determinant Wzz;LPS O-antigen chain length determinant protein WzzB	568	574	1.01056	1	3727	303	984	973.652	1	1	1	1	1	1	1	1	1	1	1	1	1	1	1	1	1	1	1	1	1	1	1	1	1	1	1	1	1	1	1	1	1	1	1	1	1	1	1
dacC	dacC	serine-type D-Ala-D-Ala carboxypeptidase	568	568	1	1	3722	1071	1203	1195.56	1	1	1	1	1	1	1	1	1	1	1	1	1	1	1	1	1	1	1	1	1	1	1	1	1	1	1	1	1	1	1	1	1	1	1	1	1	1	1
group_1344	dmsC	Dimethyl sulfoxide reductase subunit C;DMSO reductase anchor subunit DmsC	568	569	1.00176	1	3721	159	810	808.534	1	1	1	1	1	1	1	1	1	1	1	1	1	1	1	1	1	1	1	1	1	1	1	1	1	1	1	1	1	1	1	1	1	1	1	1	1	1	1
torA	torA	trimethylamine-N-oxide reductase TorA;hypothetical protein	568	569	1.00176	1	3720	258	2553	2548.52	1	1	1	1	1	1	1	1	1	1	1	1	1	1	1	1	1	1	1	1	1	1	1	1	1	1	1	1	1	1	1	1	1	1	1	1	1	1	1
foxA	foxA	Ferrioxamine B receptor;ferrioxamine B receptor FoxA	568	569	1.00176	1	3719	528	2091	2087.3	1	1	1	1	1	1	1	1	1	1	1	1	1	1	1	1	1	1	1	1	1	1	1	1	1	1	1	1	1	1	1	1	1	1	1	1	1	1	1
group_1343	glpR	transcriptional regulator;DNA-binding transcriptional regulator of sugar metabolism DeoR/GlpR family	568	568	1	1	3718	792	792	792	1	1	1	1	1	1	1	1	1	1	1	1	1	1	1	1	1	1	1	1	1	1	1	1	1	1	1	1	1	1	1	1	1	1	1	1	1	1	1
group_1342	rhaT	EamA family transporter;Permease of the drug/metabolite transporter (DMT) superfamily	568	568	1	1	3716	876	927	926.91	1	1	1	1	1	1	1	1	1	1	1	1	1	1	1	1	1	1	1	1	1	1	1	1	1	1	1	1	1	1	1	1	1	1	1	1	1	1	1
rsxE	rsxE	electron transport complex subunit RsxE;Ion-translocating oxidoreductase complex subunit E	568	568	1	1	3715	630	693	692.889	1	1	1	1	1	1	1	1	1	1	1	1	1	1	1	1	1	1	1	1	1	1	1	1	1	1	1	1	1	1	1	1	1	1	1	1	1	1	1
group_1341	yccC	Uncharacterized membrane protein YccC;Inner membrane protein;putative membrane protein YccC	568	569	1.00176	1	3714	402	2088	2084.27	1	1	1	1	1	1	1	1	1	1	1	1	1	1	1	1	1	1	1	1	1	1	1	1	1	1	1	1	1	1	1	1	1	1	1	1	1	1	1
cfa	cfa	cyclopropane fatty acyl phospholipid synthase;Cyclopropane-fatty-acyl-phospholipid synthase	568	569	1.00176	1	3712	156	1149	1146.96	1	1	1	1	1	1	1	1	1	1	1	1	1	1	1	1	1	1	1	1	1	1	1	1	1	1	1	1	1	1	1	1	1	1	1	1	1	1	1
norM~~~mdtK	norM;mdtK	MATE family efflux transporter;MdtK family multidrug efflux MATE transporter	568	568	1	1	3711	1194	1374	1373.68	1	1	1	1	1	1	1	1	1	1	1	1	1	1	1	1	1	1	1	1	1	1	1	1	1	1	1	1	1	1	1	1	1	1	1	1	1	1	1
mASE1	mASE1	diguanylate cyclase;hypothetical protein	568	571	1.00528	1	3710	195	2991	2974.81	1	1	1	1	1	1	1	1	1	1	1	1	1	1	1	1	1	1	1	1	1	1	1	1	1	1	1	1	1	1	1	1	1	1	1	1	1	1	1
rimJ	rimJ	Alanine acetyltransferase;ribosomal protein S5-alanine N-acetyltransferase	568	569	1.00176	1	3708	225	585	583.951	1	1	1	1	1	1	1	1	1	1	1	1	1	1	1	1	1	1	1	1	1	1	1	1	1	1	1	1	1	1	1	1	1	1	1	1	1	1	1
grxD	grxD	Glutaredoxin;monothiol glutaredoxin 4	568	568	1	1	3707	261	348	347.847	1	1	1	1	1	1	1	1	1	1	1	1	1	1	1	1	1	1	1	1	1	1	1	1	1	1	1	1	1	1	1	1	1	1	1	1	1	1	1
cheY	cheY	response regulator;chemotaxis regulatory protein CheY	568	568	1	1	3706	219	390	389.699	1	1	1	1	1	1	1	1	1	1	1	1	1	1	1	1	1	1	1	1	1	1	1	1	1	1	1	1	1	1	1	1	1	1	1	1	1	1	1
cobD	cobD	threonine-phosphate decarboxylase CobD	568	568	1	1	3704	1062	1095	1094.94	1	1	1	1	1	1	1	1	1	1	1	1	1	1	1	1	1	1	1	1	1	1	1	1	1	1	1	1	1	1	1	1	1	1	1	1	1	1	1
rcsD	rcsD	phosphotransferase RcsD;Phosphotransfer intermediate protein in two-component regulatory system with RcsBC;Two-component system sensor kinase	568	573	1.0088	1	3703	768	2670	2646.17	1	1	1	1	1	1	1	1	1	1	1	1	1	1	1	1	1	1	1	1	1	1	1	1	1	1	1	1	1	1	1	1	1	1	1	1	1	1	1
ubiK	ubiK	Ubiquinone biosynthesis accessory factor UbiK	568	568	1	1	3702	297	297	297	1	1	1	1	1	1	1	1	1	1	1	1	1	1	1	1	1	1	1	1	1	1	1	1	1	1	1	1	1	1	1	1	1	1	1	1	1	1	1
yeaC	yeaC	DUF1315 domain-containing protein	568	568	1	1	3701	144	279	278.525	1	1	1	1	1	1	1	1	1	1	1	1	1	1	1	1	1	1	1	1	1	1	1	1	1	1	1	1	1	1	1	1	1	1	1	1	1	1	1
group_1338	acrA	Acriflavin resistance protein A;multidrug efflux RND transporter periplasmic adaptor subunit AcrA	568	569	1.00176	1	3699	288	1230	1192.02	1	1	1	1	1	1	1	1	1	1	1	1	1	1	1	1	1	1	1	1	1	1	1	1	1	1	1	1	1	1	1	1	1	1	1	1	1	1	1
group_1337	djlA	co-chaperone DjlA;DnaJ-like protein;Molecular chaperone DjlA	568	570	1.00352	1	3698	180	813	809.837	1	1	1	1	1	1	1	1	1	1	1	1	1	1	1	1	1	1	1	1	1	1	1	1	1	1	1	1	1	1	1	1	1	1	1	1	1	1	1
pipA	pipA	Type III secretion system effector protease PipA;type III secretion system effector protease PipA	568	568	1	1	3697	504	681	680.377	1	1	1	1	1	1	1	1	1	1	1	1	1	1	1	1	1	1	1	1	1	1	1	1	1	1	1	1	1	1	1	1	1	1	1	1	1	1	1
group_1336	rhaT	Permease of the drug/metabolite transporter (DMT) superfamily;Membrane protein;hypothetical protein;Inner membrane protein ytfF	568	573	1.0088	1	3695	174	966	956.702	1	1	1	1	1	1	1	1	1	1	1	1	1	1	1	1	1	1	1	1	1	1	1	1	1	1	1	1	1	1	1	1	1	1	1	1	1	1	1
ccmA~~~yadG	ccmA;yadG	Multidrug ABC transporter;ABC transporter ATP-binding protein;putative ABC transporter ATP-binding protein YadG	568	569	1.00176	1	3694	405	927	925.334	1	1	1	1	1	1	1	1	1	1	1	1	1	1	1	1	1	1	1	1	1	1	1	1	1	1	1	1	1	1	1	1	1	1	1	1	1	1	1
mzrA	mzrA	hypothetical protein;EnvZ/OmpR regulon moderator MzrA	568	568	1	1	3693	240	384	383.746	1	1	1	1	1	1	1	1	1	1	1	1	1	1	1	1	1	1	1	1	1	1	1	1	1	1	1	1	1	1	1	1	1	1	1	1	1	1	1
group_1335	soxR	redox-sensitive transcriptional activator SoxR	568	568	1	1	3691	387	459	458.746	1	1	1	1	1	1	1	1	1	1	1	1	1	1	1	1	1	1	1	1	1	1	1	1	1	1	1	1	1	1	1	1	1	1	1	1	1	1	1
ftsY	ftsY	signal recognition particle-docking protein FtsY	568	568	1	1	3690	1440	1479	1478.93	1	1	1	1	1	1	1	1	1	1	1	1	1	1	1	1	1	1	1	1	1	1	1	1	1	1	1	1	1	1	1	1	1	1	1	1	1	1	1
group_1334	ebsC	cys-tRNA(pro)/cys-tRNA(cys) deacylase;Cys-tRNA(Pro) deacylase prolyl-tRNA editing enzyme YbaK/EbsC	568	568	1	1	3689	441	459	458.968	1	1	1	1	1	1	1	1	1	1	1	1	1	1	1	1	1	1	1	1	1	1	1	1	1	1	1	1	1	1	1	1	1	1	1	1	1	1	1
group_1333		Gcv operon activator;hypothetical protein;Transcriptional regulator	568	569	1.00176	1	3688	159	924	922.297	1	1	1	1	1	1	1	1	1	1	1	1	1	1	1	1	1	1	1	1	1	1	1	1	1	1	1	1	1	1	1	1	1	1	1	1	1	1	1
dsbL	dsbL	Thiol:disulfide interchange protein DsbL;Disulfide isomerase	568	570	1.00352	1	3687	204	672	669.337	1	1	1	1	1	1	1	1	1	1	1	1	1	1	1	1	1	1	1	1	1	1	1	1	1	1	1	1	1	1	1	1	1	1	1	1	1	1	1
pipB	pipB	SPI-2 type III secretion system effector PipB	568	568	1	1	3686	564	876	869.408	1	1	1	1	1	1	1	1	1	1	1	1	1	1	1	1	1	1	1	1	1	1	1	1	1	1	1	1	1	1	1	1	1	1	1	1	1	1	1
putP	putP	solute symporter family protein;acetylneuraminate ABC transporter;hypothetical protein;Na+/proline symporter	568	569	1.00176	1	3685	246	1497	1492.15	1	1	1	1	1	1	1	1	1	1	1	1	1	1	1	1	1	1	1	1	1	1	1	1	1	1	1	1	1	1	1	1	1	1	1	1	1	1	1
group_1332		Membrane protein;Inner membrane protein	568	568	1	1	3684	426	480	479.81	1	1	1	1	1	1	1	1	1	1	1	1	1	1	1	1	1	1	1	1	1	1	1	1	1	1	1	1	1	1	1	1	1	1	1	1	1	1	1
yehD	yehD	fimbrial protein YehD	568	568	1	1	3681	477	531	530.905	1	1	1	1	1	1	1	1	1	1	1	1	1	1	1	1	1	1	1	1	1	1	1	1	1	1	1	1	1	1	1	1	1	1	1	1	1	1	1
ulaE	ulaE	L-ribulose-5-phosphate 3-epimerase UlaE	568	568	1	1	3680	855	882	855.048	1	1	1	1	1	1	1	1	1	1	1	1	1	1	1	1	1	1	1	1	1	1	1	1	1	1	1	1	1	1	1	1	1	1	1	1	1	1	1
group_1330		hypothetical protein;Dimeric alpha-beta barrel domain protein	568	568	1	1	3679	150	339	338.667	1	1	1	1	1	1	1	1	1	1	1	1	1	1	1	1	1	1	1	1	1	1	1	1	1	1	1	1	1	1	1	1	1	1	1	1	1	1	1
group_1328		hypothetical protein;Shikimate transporter	568	568	1	1	3677	531	597	596.884	1	1	1	1	1	1	1	1	1	1	1	1	1	1	1	1	1	1	1	1	1	1	1	1	1	1	1	1	1	1	1	1	1	1	1	1	1	1	1
hisJ	hisJ	histidine ABC transporter substrate-binding protein HisJ;Histidine-binding periplasmic protein	568	569	1.00176	1	3676	129	783	781.334	1	1	1	1	1	1	1	1	1	1	1	1	1	1	1	1	1	1	1	1	1	1	1	1	1	1	1	1	1	1	1	1	1	1	1	1	1	1	1
dgoK	dgoK	2-dehydro-3-deoxygalactonokinase;2-keto-3-deoxy-galactonokinase	568	568	1	1	3675	693	879	878.673	1	1	1	1	1	1	1	1	1	1	1	1	1	1	1	1	1	1	1	1	1	1	1	1	1	1	1	1	1	1	1	1	1	1	1	1	1	1	1
sbcD	sbcD	exonuclease subunit SbcD;Nuclease sbcCD subunit D	568	571	1.00528	1	3673	441	1203	1196.43	1	1	1	1	1	1	1	1	1	1	1	1	1	1	1	1	1	1	1	1	1	1	1	1	1	1	1	1	1	1	1	1	1	1	1	1	1	1	1
eutT	eutT	ethanolamine utilization cob(I)yrinic acid ac-diamide adenosyltransferase EutT	568	570	1.00352	1	3672	360	804	801.032	1	1	1	1	1	1	1	1	1	1	1	1	1	1	1	1	1	1	1	1	1	1	1	1	1	1	1	1	1	1	1	1	1	1	1	1	1	1	1
grcA	grcA	Autonomous glycyl radical cofactor;autonomous glycyl radical cofactor GrcA	568	568	1	1	3671	384	483	384.174	1	1	1	1	1	1	1	1	1	1	1	1	1	1	1	1	1	1	1	1	1	1	1	1	1	1	1	1	1	1	1	1	1	1	1	1	1	1	1
fimD	fimD	Outer membrane usher protein;Fimbrial usher protein;usher protein FimD	568	569	1.00176	1	3669	933	2613	2608.4	1	1	1	1	1	1	1	1	1	1	1	1	1	1	1	1	1	1	1	1	1	1	1	1	1	1	1	1	1	1	1	1	1	1	1	1	1	1	1
fimI	fimI	type 1 fimbrial protein subunit FimI;hypothetical protein	568	568	1	1	3668	234	534	528.074	1	1	1	1	1	1	1	1	1	1	1	1	1	1	1	1	1	1	1	1	1	1	1	1	1	1	1	1	1	1	1	1	1	1	1	1	1	1	1
ybgC	ybgC	tol-pal system-associated acyl-CoA thioesterase	568	568	1	1	3667	393	405	404.979	1	1	1	1	1	1	1	1	1	1	1	1	1	1	1	1	1	1	1	1	1	1	1	1	1	1	1	1	1	1	1	1	1	1	1	1	1	1	1
group_1326	mviM	Putative oxidoreductase;oxidoreductase;putative dehydrogenase	568	573	1.0088	1	3666	201	999	990.23	1	1	1	1	1	1	1	1	1	1	1	1	1	1	1	1	1	1	1	1	1	1	1	1	1	1	1	1	1	1	1	1	1	1	1	1	1	1	1
group_1325		Putative cytoplasmic protein	568	568	1	1	3665	228	420	414.93	1	1	1	1	1	1	1	1	1	1	1	1	1	1	1	1	1	1	1	1	1	1	1	1	1	1	1	1	1	1	1	1	1	1	1	1	1	1	1
group_1324	sgrR	hypothetical protein;Oligopeptide ABC transporter substrate-binding protein OppA;peptide ABC transporter substrate-binding protein;ABC transporter substrate-binding protein;DNA-binding transcriptional regulator SgrR of sgrS sRNA contains a MarR-type HTH domain and a periplasmic-type solute-binding domain	568	572	1.00704	1	3664	138	1701	1687.96	1	1	1	1	1	1	1	1	1	1	1	1	1	1	1	1	1	1	1	1	1	1	1	1	1	1	1	1	1	1	1	1	1	1	1	1	1	1	1
group_1321		Ion channel;Ion-trans-2 domain-containing protein	568	568	1	1	3660	1071	1116	1071.48	1	1	1	1	1	1	1	1	1	1	1	1	1	1	1	1	1	1	1	1	1	1	1	1	1	1	1	1	1	1	1	1	1	1	1	1	1	1	1
group_1319		carbon-nitrogen hydrolase family protein;CN hydrolase domain-containing protein	568	568	1	1	3658	426	657	656.593	1	1	1	1	1	1	1	1	1	1	1	1	1	1	1	1	1	1	1	1	1	1	1	1	1	1	1	1	1	1	1	1	1	1	1	1	1	1	1
ptrB	ptrB	Oligopeptidase;oligopeptidase B	568	568	1	1	3657	279	2052	2048.88	1	1	1	1	1	1	1	1	1	1	1	1	1	1	1	1	1	1	1	1	1	1	1	1	1	1	1	1	1	1	1	1	1	1	1	1	1	1	1
bcfA	bcfA	hypothetical protein;fimbrial protein BcfA	568	568	1	1	3655	234	543	542.456	1	1	1	1	1	1	1	1	1	1	1	1	1	1	1	1	1	1	1	1	1	1	1	1	1	1	1	1	1	1	1	1	1	1	1	1	1	1	1
group_1318	ybhL	Inhibitor of apoptosis-promoting Bax1;Inner membrane protein YbhL	568	568	1	1	3654	522	654	522.232	1	1	1	1	1	1	1	1	1	1	1	1	1	1	1	1	1	1	1	1	1	1	1	1	1	1	1	1	1	1	1	1	1	1	1	1	1	1	1
group_1317	narH	hypothetical protein;nitrate reductase subunit beta	568	569	1.00176	1	3653	213	1536	1533.28	1	1	1	1	1	1	1	1	1	1	1	1	1	1	1	1	1	1	1	1	1	1	1	1	1	1	1	1	1	1	1	1	1	1	1	1	1	1	1
bamC	bamC	outer membrane protein assembly factor BamC	568	569	1.00176	1	3651	246	1035	1033.19	1	1	1	1	1	1	1	1	1	1	1	1	1	1	1	1	1	1	1	1	1	1	1	1	1	1	1	1	1	1	1	1	1	1	1	1	1	1	1
livG	livG	high-affinity branched-chain amino acid ABC transporter ATP-binding protein LivG;High-affinity branched-chain amino acid transport ATP-binding protein	568	569	1.00176	1	3650	267	768	766.629	1	1	1	1	1	1	1	1	1	1	1	1	1	1	1	1	1	1	1	1	1	1	1	1	1	1	1	1	1	1	1	1	1	1	1	1	1	1	1
group_1316		Membrane protein;DUF4034 domain-containing protein	568	570	1.00352	1	3649	381	2112	2104.67	1	1	1	1	1	1	1	1	1	1	1	1	1	1	1	1	1	1	1	1	1	1	1	1	1	1	1	1	1	1	1	1	1	1	1	1	1	1	1
phnS	phnS	hypothetical protein;2-aminoethylphosphonate ABC transporter substrate-binding protein	568	574	1.01056	1	3648	126	1014	1003.4	1	1	1	1	1	1	1	1	1	1	1	1	1	1	1	1	1	1	1	1	1	1	1	1	1	1	1	1	1	1	1	1	1	1	1	1	1	1	1
fliB	fliB	flagellin lysine-N-methylase	568	568	1	1	3647	789	1206	1205.27	1	1	1	1	1	1	1	1	1	1	1	1	1	1	1	1	1	1	1	1	1	1	1	1	1	1	1	1	1	1	1	1	1	1	1	1	1	1	1
ansB	ansB	L-asparaginase 2	568	571	1.00528	1	3646	183	1047	1041.43	1	1	1	1	1	1	1	1	1	1	1	1	1	1	1	1	1	1	1	1	1	1	1	1	1	1	1	1	1	1	1	1	1	1	1	1	1	1	1
yggL	yggL	Protein;DUF469 domain-containing protein	568	568	1	1	3645	255	327	326.746	1	1	1	1	1	1	1	1	1	1	1	1	1	1	1	1	1	1	1	1	1	1	1	1	1	1	1	1	1	1	1	1	1	1	1	1	1	1	1
group_1314		diguanylate cyclase;Diguanylate cyclase	568	568	1	1	3642	282	309	307.812	1	1	1	1	1	1	1	1	1	1	1	1	1	1	1	1	1	1	1	1	1	1	1	1	1	1	1	1	1	1	1	1	1	1	1	1	1	1	1
pstB	pstB	Phosphate transport ATP-binding protein PstB;ATP-binding cassette domain-containing protein;phosphate ABC transporter ATP-binding protein PstB	568	569	1.00176	1	3641	381	774	772.656	1	1	1	1	1	1	1	1	1	1	1	1	1	1	1	1	1	1	1	1	1	1	1	1	1	1	1	1	1	1	1	1	1	1	1	1	1	1	1
ybgA	ybgA	DUF1722 domain-containing protein	568	568	1	1	3639	891	960	959.879	1	1	1	1	1	1	1	1	1	1	1	1	1	1	1	1	1	1	1	1	1	1	1	1	1	1	1	1	1	1	1	1	1	1	1	1	1	1	1
group_1313	gloB	Hydroxyacylglutathione hydrolase;hydroxyacylglutathione hydrolase	568	576	1.01408	1	3638	108	756	744.548	1	1	1	1	1	1	1	1	1	1	1	1	1	1	1	1	1	1	1	1	1	1	1	1	1	1	1	1	1	1	1	1	1	1	1	1	1	1	1
endA	endA	Endonuclease I;deoxyribonuclease I	568	568	1	1	3637	552	708	707.725	1	1	1	1	1	1	1	1	1	1	1	1	1	1	1	1	1	1	1	1	1	1	1	1	1	1	1	1	1	1	1	1	1	1	1	1	1	1	1
sopD	sopD	SPI-1 type III secretion system effector SopD	568	568	1	1	3635	792	966	965.525	1	1	1	1	1	1	1	1	1	1	1	1	1	1	1	1	1	1	1	1	1	1	1	1	1	1	1	1	1	1	1	1	1	1	1	1	1	1	1
ftsP	ftsP	SufI protein;cell division protein FtsP	568	569	1.00176	1	3634	204	1413	1410.51	1	1	1	1	1	1	1	1	1	1	1	1	1	1	1	1	1	1	1	1	1	1	1	1	1	1	1	1	1	1	1	1	1	1	1	1	1	1	1
hemX	hemX	HemX -like protein;uroporphyrinogen-III C-methyltransferase	568	569	1.00176	1	3633	309	1170	1167.74	1	1	1	1	1	1	1	1	1	1	1	1	1	1	1	1	1	1	1	1	1	1	1	1	1	1	1	1	1	1	1	1	1	1	1	1	1	1	1
queG	queG	tRNA epoxyqueuosine(34) reductase QueG;Fe-S protein	568	569	1.00176	1	3632	381	1140	1137.62	1	1	1	1	1	1	1	1	1	1	1	1	1	1	1	1	1	1	1	1	1	1	1	1	1	1	1	1	1	1	1	1	1	1	1	1	1	1	1
tssA1	tssA1	Cytoplasmic protein;Type VI protein secretion system component TssA1/VasJ/EvfE contains ImpA_N domain	568	568	1	1	3631	633	1056	1055.26	1	1	1	1	1	1	1	1	1	1	1	1	1	1	1	1	1	1	1	1	1	1	1	1	1	1	1	1	1	1	1	1	1	1	1	1	1	1	1
safA	safA	Saf-pilin pilus formation protein SafA;Saf-pilin pilus formation protein	568	568	1	1	3630	342	498	497.376	1	1	1	1	1	1	1	1	1	1	1	1	1	1	1	1	1	1	1	1	1	1	1	1	1	1	1	1	1	1	1	1	1	1	1	1	1	1	1
cmoB	cmoB	hypothetical protein;tRNA 5-methoxyuridine(34)/uridine 5-oxyacetic acid(34) synthase CmoB	568	569	1.00176	1	3629	90	972	970.181	1	1	1	1	1	1	1	1	1	1	1	1	1	1	1	1	1	1	1	1	1	1	1	1	1	1	1	1	1	1	1	1	1	1	1	1	1	1	1
group_1311		hypothetical protein;fimbrial protein;Adhesion protein	568	570	1.00352	1	3628	255	1050	1045.84	1	1	1	1	1	1	1	1	1	1	1	1	1	1	1	1	1	1	1	1	1	1	1	1	1	1	1	1	1	1	1	1	1	1	1	1	1	1	1
ahpC	ahpC	hypothetical protein;alkyl hydroperoxide reductase subunit C	568	569	1.00176	1	3627	99	564	562.682	1	1	1	1	1	1	1	1	1	1	1	1	1	1	1	1	1	1	1	1	1	1	1	1	1	1	1	1	1	1	1	1	1	1	1	1	1	1	1
wcaD	wcaD	putative colanic acid polymerase WcaD;Colanic acid biosynthesis protein;colanic acid polymerase WcaD	568	569	1.00176	1	3626	372	1215	1212.86	1	1	1	1	1	1	1	1	1	1	1	1	1	1	1	1	1	1	1	1	1	1	1	1	1	1	1	1	1	1	1	1	1	1	1	1	1	1	1
thiD	thiD	Phosphomethylpyrimidine kinase;bifunctional hydroxymethylpyrimidine kinase/phosphomethylpyrimidine kinase	568	568	1	1	3625	699	801	800.82	1	1	1	1	1	1	1	1	1	1	1	1	1	1	1	1	1	1	1	1	1	1	1	1	1	1	1	1	1	1	1	1	1	1	1	1	1	1	1
ulaR	ulaR	HTH-type transcriptional regulator UlaR	568	569	1.00176	1	3622	198	756	754.661	1	1	1	1	1	1	1	1	1	1	1	1	1	1	1	1	1	1	1	1	1	1	1	1	1	1	1	1	1	1	1	1	1	1	1	1	1	1	1
sdiA	sdiA	transcriptional regulator SdiA	568	568	1	1	3619	687	723	722.556	1	1	1	1	1	1	1	1	1	1	1	1	1	1	1	1	1	1	1	1	1	1	1	1	1	1	1	1	1	1	1	1	1	1	1	1	1	1	1
bioF	bioF	8-amino-7-oxononanoate synthase	568	569	1.00176	1	3616	486	1158	1155.97	1	1	1	1	1	1	1	1	1	1	1	1	1	1	1	1	1	1	1	1	1	1	1	1	1	1	1	1	1	1	1	1	1	1	1	1	1	1	1
ydiF	ydiF	Acetyl-CoA:acetoacetyl-CoA transferase alpha subunit;Acetate CoA-transferase YdiF;hypothetical protein	568	569	1.00176	1	3612	702	1596	1592.65	1	1	1	1	1	1	1	1	1	1	1	1	1	1	1	1	1	1	1	1	1	1	1	1	1	1	1	1	1	1	1	1	1	1	1	1	1	1	1
ytgA	ytgA	DUF3617 domain-containing protein;putative protein YtgA	568	568	1	1	3611	381	489	488.81	1	1	1	1	1	1	1	1	1	1	1	1	1	1	1	1	1	1	1	1	1	1	1	1	1	1	1	1	1	1	1	1	1	1	1	1	1	1	1
idnD	idnD	L-idonate 5-dehydrogenase	568	568	1	1	3610	852	1032	1031.68	1	1	1	1	1	1	1	1	1	1	1	1	1	1	1	1	1	1	1	1	1	1	1	1	1	1	1	1	1	1	1	1	1	1	1	1	1	1	1
aroP	aroP	amino acid permease;aromatic amino acid transporter AroP	568	569	1.00176	1	3609	447	1371	1368.51	1	1	1	1	1	1	1	1	1	1	1	1	1	1	1	1	1	1	1	1	1	1	1	1	1	1	1	1	1	1	1	1	1	1	1	1	1	1	1
aceE	aceE	pyruvate dehydrogenase (acetyl-transferring) homodimeric type;Pyruvate dehydrogenase E1 component	568	570	1.00352	1	3608	399	2664	2654.62	1	1	1	1	1	1	1	1	1	1	1	1	1	1	1	1	1	1	1	1	1	1	1	1	1	1	1	1	1	1	1	1	1	1	1	1	1	1	1
group_1305	fixB	Electron transfer flavoprotein subunit YdiR;Electron transfer flavoprotein FAD-binding domain protein;Electron transfer flavoprotein subunit alpha FixB;electron transfer flavoprotein subunit alpha	568	571	1.00528	1	3607	273	936	930.909	1	1	1	1	1	1	1	1	1	1	1	1	1	1	1	1	1	1	1	1	1	1	1	1	1	1	1	1	1	1	1	1	1	1	1	1	1	1	1
phsB	phsB	Thiosulfate reductase electron transfer subunit PhsB;thiosulfate reductase electron transport protein PhsB	568	568	1	1	3606	495	579	578.852	1	1	1	1	1	1	1	1	1	1	1	1	1	1	1	1	1	1	1	1	1	1	1	1	1	1	1	1	1	1	1	1	1	1	1	1	1	1	1
padR	padR	Transcriptional regulator;PadR family transcriptional regulator	568	569	1.00176	1	3603	159	645	643.798	1	1	1	1	1	1	1	1	1	1	1	1	1	1	1	1	1	1	1	1	1	1	1	1	1	1	1	1	1	1	1	1	1	1	1	1	1	1	1
group_1304	fimA	hypothetical protein;fimbrial protein	568	569	1.00176	1	3602	174	1080	1077.84	1	1	1	1	1	1	1	1	1	1	1	1	1	1	1	1	1	1	1	1	1	1	1	1	1	1	1	1	1	1	1	1	1	1	1	1	1	1	1
gntX	gntX	DNA utilization protein GntX	568	568	1	1	3601	657	684	683.952	1	1	1	1	1	1	1	1	1	1	1	1	1	1	1	1	1	1	1	1	1	1	1	1	1	1	1	1	1	1	1	1	1	1	1	1	1	1	1
clsB	clsB	Phospholipase;Cardiolipin synthase B;cardiolipin synthase ClsB	568	572	1.00704	1	3600	360	1242	1233.5	1	1	1	1	1	1	1	1	1	1	1	1	1	1	1	1	1	1	1	1	1	1	1	1	1	1	1	1	1	1	1	1	1	1	1	1	1	1	1
group_1303	dmsB	dimethylsulfoxide reductase subunit B;Anaerobic dimethyl sulfoxide reductase subunit B;Dimethyl sulfoxide reductase chain B	568	573	1.0088	1	3599	138	627	620.89	1	1	1	1	1	1	1	1	1	1	1	1	1	1	1	1	1	1	1	1	1	1	1	1	1	1	1	1	1	1	1	1	1	1	1	1	1	1	1
yjjW	yjjW	hypothetical protein;YjjW family glycine radical enzyme activase	568	568	1	1	3598	417	588	587.651	1	1	1	1	1	1	1	1	1	1	1	1	1	1	1	1	1	1	1	1	1	1	1	1	1	1	1	1	1	1	1	1	1	1	1	1	1	1	1
yjjU	yjjU	patatin family protein;putative phospholipase patatin/cPLA2 family	568	568	1	1	3597	936	1095	1094.16	1	1	1	1	1	1	1	1	1	1	1	1	1	1	1	1	1	1	1	1	1	1	1	1	1	1	1	1	1	1	1	1	1	1	1	1	1	1	1
thrC	thrC	threonine synthase;Threonine synthase	568	569	1.00176	1	3596	120	1287	1284.71	1	1	1	1	1	1	1	1	1	1	1	1	1	1	1	1	1	1	1	1	1	1	1	1	1	1	1	1	1	1	1	1	1	1	1	1	1	1	1
alsT	alsT	alanine:cation symporter family protein;sodium:alanine symporter family protein;Na+/alanine symporter	568	569	1.00176	1	3595	192	1431	1428.46	1	1	1	1	1	1	1	1	1	1	1	1	1	1	1	1	1	1	1	1	1	1	1	1	1	1	1	1	1	1	1	1	1	1	1	1	1	1	1
gatD	gatD	Galactitol-1-phosphate 5-dehydrogenase;Galactitol-1-phosphate dehydrogenase;galactitol-1-phosphate 5-dehydrogenase	568	569	1.00176	1	3594	402	1044	1041.9	1	1	1	1	1	1	1	1	1	1	1	1	1	1	1	1	1	1	1	1	1	1	1	1	1	1	1	1	1	1	1	1	1	1	1	1	1	1	1
gcl	gcl	glyoxylate carboligase;Glyoxylate carboligase (Tartronate-semialdehyde synthase)	568	569	1.00176	1	3593	345	1782	1777.76	1	1	1	1	1	1	1	1	1	1	1	1	1	1	1	1	1	1	1	1	1	1	1	1	1	1	1	1	1	1	1	1	1	1	1	1	1	1	1
group_1302	fepD	Oxaloacetate decarboxylase (Na(+) extruding);ABC-type Fe3+-siderophore transport system permease component	568	568	1	1	3592	819	1080	1079.54	1	1	1	1	1	1	1	1	1	1	1	1	1	1	1	1	1	1	1	1	1	1	1	1	1	1	1	1	1	1	1	1	1	1	1	1	1	1	1
ycbJ	ycbJ	Phosphotransferase enzyme family;putative protein YcbJ	568	568	1	1	3591	774	894	893.789	1	1	1	1	1	1	1	1	1	1	1	1	1	1	1	1	1	1	1	1	1	1	1	1	1	1	1	1	1	1	1	1	1	1	1	1	1	1	1
pilN	pilN	Type IV pilus assembly protein PilN	568	568	1	1	3588	471	540	539.879	1	1	1	1	1	1	1	1	1	1	1	1	1	1	1	1	1	1	1	1	1	1	1	1	1	1	1	1	1	1	1	1	1	1	1	1	1	1	1
flgF	flgF	Flagellar basal-body rod protein FlgF;Flagellar basal body protein	568	569	1.00176	1	3587	294	756	754.703	1	1	1	1	1	1	1	1	1	1	1	1	1	1	1	1	1	1	1	1	1	1	1	1	1	1	1	1	1	1	1	1	1	1	1	1	1	1	1
sspB	sspB	ClpXP protease specificity-enhancing factor	568	568	1	1	3586	375	501	500.778	1	1	1	1	1	1	1	1	1	1	1	1	1	1	1	1	1	1	1	1	1	1	1	1	1	1	1	1	1	1	1	1	1	1	1	1	1	1	1
crcB	crcB	fluoride efflux transporter CrcB	568	568	1	1	3585	315	384	383.514	1	1	1	1	1	1	1	1	1	1	1	1	1	1	1	1	1	1	1	1	1	1	1	1	1	1	1	1	1	1	1	1	1	1	1	1	1	1	1
modF	modF	ABC transporter ATP-binding protein ModF;molybdate ABC transporter ATP-binding protein ModF	568	568	1	1	3584	1212	1476	1475.07	1	1	1	1	1	1	1	1	1	1	1	1	1	1	1	1	1	1	1	1	1	1	1	1	1	1	1	1	1	1	1	1	1	1	1	1	1	1	1
zupT	zupT	zinc transporter ZupT;Zinc transporter ZupT	568	569	1.00176	1	3582	351	780	778.582	1	1	1	1	1	1	1	1	1	1	1	1	1	1	1	1	1	1	1	1	1	1	1	1	1	1	1	1	1	1	1	1	1	1	1	1	1	1	1
abrB	abrB	Transport protein AbrB;AbrB family transcriptional regulator;Transport protein;putative membrane protein AbrB regulator of aidB expression	568	570	1.00352	1	3581	192	1047	1043.42	1	1	1	1	1	1	1	1	1	1	1	1	1	1	1	1	1	1	1	1	1	1	1	1	1	1	1	1	1	1	1	1	1	1	1	1	1	1	1
group_1299	glpR	DeoR family transcriptional regulator;DNA-binding transcriptional regulator of sugar metabolism DeoR/GlpR family;Putative transcriptional regulator;Glycerol-3-phosphate regulon repressor	568	570	1.00352	1	3580	210	825	765.568	1	1	1	1	1	1	1	1	1	1	1	1	1	1	1	1	1	1	1	1	1	1	1	1	1	1	1	1	1	1	1	1	1	1	1	1	1	1	1
cbiL	cbiL	Cobalt-precorrin-2 C(20)-methyltransferase;cobalt-factor II C(20)-methyltransferase	568	568	1	1	3579	438	714	712.542	1	1	1	1	1	1	1	1	1	1	1	1	1	1	1	1	1	1	1	1	1	1	1	1	1	1	1	1	1	1	1	1	1	1	1	1	1	1	1
group_1298		integrase;Integrase	568	568	1	1	3577	1230	1263	1262.94	1	1	1	1	1	1	1	1	1	1	1	1	1	1	1	1	1	1	1	1	1	1	1	1	1	1	1	1	1	1	1	1	1	1	1	1	1	1	1
yadS	yadS	Uncharacterized membrane protein YeiH;putative membrane protein YeiH	568	568	1	1	3576	546	624	623.863	1	1	1	1	1	1	1	1	1	1	1	1	1	1	1	1	1	1	1	1	1	1	1	1	1	1	1	1	1	1	1	1	1	1	1	1	1	1	1
group_1297	ubiE	Ubiquinone/menaquinone biosynthesis methyltransferase ubiE;hypothetical protein;Ubiquinone/menaquinone biosynthesis C-methylase UbiE/MenG	568	569	1.00176	1	3575	144	771	769.629	1	1	1	1	1	1	1	1	1	1	1	1	1	1	1	1	1	1	1	1	1	1	1	1	1	1	1	1	1	1	1	1	1	1	1	1	1	1	1
group_1296	araJ	Putative drug efflux protein;MFS sugar transporter;putative arabinose efflux permease AraJ MFS family	568	578	1.01761	1	3574	324	1176	1155.65	1	1	1	1	1	1	1	1	1	1	1	1	1	1	1	1	1	1	1	1	1	1	1	1	1	1	1	1	1	1	1	1	1	1	1	1	1	1	1
nagE	nagE	PTS N-acetyl glucosamine transporter subunit IIABC;N-acetylglucosamine-specific PTS system EIICBA components;Pts system N-acetylglucosamine-specific IIABC component	568	570	1.00352	1	3573	279	1953	1946.11	1	1	1	1	1	1	1	1	1	1	1	1	1	1	1	1	1	1	1	1	1	1	1	1	1	1	1	1	1	1	1	1	1	1	1	1	1	1	1
group_1294	eAL	hypothetical protein;diguanylate phosphodiesterase;EAL domain c-di-GMP-specific phosphodiesterase class I (or its enzymatically inactive variant)	568	572	1.00704	1	3571	105	720	709.379	1	1	1	1	1	1	1	1	1	1	1	1	1	1	1	1	1	1	1	1	1	1	1	1	1	1	1	1	1	1	1	1	1	1	1	1	1	1	1
ylbE	ylbE	Uncharacterized protein YlbE;Putative cytoplasmic protein;putative protein YlbE	568	569	1.00176	1	3570	366	1260	1257.88	1	1	1	1	1	1	1	1	1	1	1	1	1	1	1	1	1	1	1	1	1	1	1	1	1	1	1	1	1	1	1	1	1	1	1	1	1	1	1
ybiW	ybiW	Formate acetyltransferase 3;formate C-acetyltransferase/glycerol dehydratase family glycyl radical enzyme;putative dehydratase YbiW	568	569	1.00176	1	3569	708	2433	2428.66	1	1	1	1	1	1	1	1	1	1	1	1	1	1	1	1	1	1	1	1	1	1	1	1	1	1	1	1	1	1	1	1	1	1	1	1	1	1	1
waaK	waaK	glycosyltransferase;hypothetical protein;Lipopolysaccharide 12-N-acetylglucosaminetransferase;Glycosyltransferase	568	574	1.01056	1	3568	201	1146	1123.12	1	1	1	1	1	1	1	1	1	1	1	1	1	1	1	1	1	1	1	1	1	1	1	1	1	1	1	1	1	1	1	1	1	1	1	1	1	1	1
group_1293	aslB	Putative regulatory protein;anaerobic sulfatase maturase	568	570	1.00352	1	3566	537	1296	1291.39	1	1	1	1	1	1	1	1	1	1	1	1	1	1	1	1	1	1	1	1	1	1	1	1	1	1	1	1	1	1	1	1	1	1	1	1	1	1	1
group_1292	asd	hypothetical protein;aspartate-semialdehyde dehydrogenase	568	569	1.00176	1	3565	327	1014	1012.13	1	1	1	1	1	1	1	1	1	1	1	1	1	1	1	1	1	1	1	1	1	1	1	1	1	1	1	1	1	1	1	1	1	1	1	1	1	1	1
atpI	atpI	ATP synthase protein I;F0F1 ATP synthase subunit I	568	568	1	1	3564	294	381	380.826	1	1	1	1	1	1	1	1	1	1	1	1	1	1	1	1	1	1	1	1	1	1	1	1	1	1	1	1	1	1	1	1	1	1	1	1	1	1	1
group_1291	uhpC	Permease;MFS transporter;hypothetical protein;Sugar phosphate permease	568	573	1.0088	1	3563	210	1227	1215.86	1	1	1	1	1	1	1	1	1	1	1	1	1	1	1	1	1	1	1	1	1	1	1	1	1	1	1	1	1	1	1	1	1	1	1	1	1	1	1
group_1290	sgrR	Nickel ABC-type transport system;hypothetical protein;HTH-type transcriptional regulator SgrR	568	569	1.00176	1	3562	696	1791	1787.66	1	1	1	1	1	1	1	1	1	1	1	1	1	1	1	1	1	1	1	1	1	1	1	1	1	1	1	1	1	1	1	1	1	1	1	1	1	1	1
yecN	yecN	Uncharacterized membrane protein YecN MAPEG domain;Inner membrane protein YecN	568	568	1	1	3561	324	396	395.873	1	1	1	1	1	1	1	1	1	1	1	1	1	1	1	1	1	1	1	1	1	1	1	1	1	1	1	1	1	1	1	1	1	1	1	1	1	1	1
asrC	asrC	sulfite reductase subunit C;Anaerobic sulfite reductase subunit C;anaerobic sulfite reductase subunit AsrC	568	569	1.00176	1	3560	243	1029	1027.18	1	1	1	1	1	1	1	1	1	1	1	1	1	1	1	1	1	1	1	1	1	1	1	1	1	1	1	1	1	1	1	1	1	1	1	1	1	1	1
citG~~~citG1	citG;citG1	Triphosphoribosyl-dephospho-CoA synthetase;putative 2-(5''-triphosphoribosyl)-3'-dephosphocoenzyme-A synthase 1	568	568	1	1	3559	786	909	908.783	1	1	1	1	1	1	1	1	1	1	1	1	1	1	1	1	1	1	1	1	1	1	1	1	1	1	1	1	1	1	1	1	1	1	1	1	1	1	1
pcnB~~~cca	pcnB;cca	multifunctional CCA addition/repair protein	568	568	1	1	3558	1242	1506	1242.46	1	1	1	1	1	1	1	1	1	1	1	1	1	1	1	1	1	1	1	1	1	1	1	1	1	1	1	1	1	1	1	1	1	1	1	1	1	1	1
group_1289		STM0539 family protein	568	568	1	1	3557	420	438	437.968	1	1	1	1	1	1	1	1	1	1	1	1	1	1	1	1	1	1	1	1	1	1	1	1	1	1	1	1	1	1	1	1	1	1	1	1	1	1	1
tauE~~~yfcA	tauE;yfcA	TSUP family transporter;Sulfite exporter TauE/SafE;putative membrane transporter protein;putative membrane transporter protein YfcA	568	568	1	1	3556	420	810	809.239	1	1	1	1	1	1	1	1	1	1	1	1	1	1	1	1	1	1	1	1	1	1	1	1	1	1	1	1	1	1	1	1	1	1	1	1	1	1	1
ddlB	ddlB	D-alanine--D-alanine ligase;D-alanine--D-alanine ligase B	568	569	1.00176	1	3554	312	921	919.123	1	1	1	1	1	1	1	1	1	1	1	1	1	1	1	1	1	1	1	1	1	1	1	1	1	1	1	1	1	1	1	1	1	1	1	1	1	1	1
group_1287	glpR	Glycerol-3-phosphate regulon repressor;HTH deoR-type domain-containing protein;Putative glycerol-3-phosphate regulon repressor;DeoR/GlpR family transcriptional regulator	568	571	1.00528	1	3553	102	759	754.702	1	1	1	1	1	1	1	1	1	1	1	1	1	1	1	1	1	1	1	1	1	1	1	1	1	1	1	1	1	1	1	1	1	1	1	1	1	1	1
araJ~~~iolT1	araJ;iolT1	MFS transporter;myo-inositol import MFS transporter IolT1	568	568	1	1	3552	1362	1434	1433.87	1	1	1	1	1	1	1	1	1	1	1	1	1	1	1	1	1	1	1	1	1	1	1	1	1	1	1	1	1	1	1	1	1	1	1	1	1	1	1
ycdZ	ycdZ	Putative inner membrane protein;Inner membrane protein YcdZ	568	568	1	1	3551	495	513	495.095	1	1	1	1	1	1	1	1	1	1	1	1	1	1	1	1	1	1	1	1	1	1	1	1	1	1	1	1	1	1	1	1	1	1	1	1	1	1	1
csgF	csgF	curli production assembly/transport protein CsgF	568	568	1	1	3550	354	417	416.889	1	1	1	1	1	1	1	1	1	1	1	1	1	1	1	1	1	1	1	1	1	1	1	1	1	1	1	1	1	1	1	1	1	1	1	1	1	1	1
aroG1~~~aroH	aroG1;aroH	3-deoxy-7-phosphoheptulonate synthase;3-deoxy-7-phosphoheptulonate synthase AroH	568	568	1	1	3549	951	1047	1046.83	1	1	1	1	1	1	1	1	1	1	1	1	1	1	1	1	1	1	1	1	1	1	1	1	1	1	1	1	1	1	1	1	1	1	1	1	1	1	1
group_1286		Membrane protein;Nucleoside-specific channel-forming protein Tsx;Outer membrane protein	568	569	1.00176	1	3548	201	762	759.923	1	1	1	1	1	1	1	1	1	1	1	1	1	1	1	1	1	1	1	1	1	1	1	1	1	1	1	1	1	1	1	1	1	1	1	1	1	1	1
cysP	cysP	Sulfate and thiosulfate binding protein CysP;thiosulfate/sulfate ABC transporter substrate-binding protein CysP	568	568	1	1	3547	765	1017	1016.56	1	1	1	1	1	1	1	1	1	1	1	1	1	1	1	1	1	1	1	1	1	1	1	1	1	1	1	1	1	1	1	1	1	1	1	1	1	1	1
group_1285		Transcriptional regulator	568	568	1	1	3546	477	759	758.504	1	1	1	1	1	1	1	1	1	1	1	1	1	1	1	1	1	1	1	1	1	1	1	1	1	1	1	1	1	1	1	1	1	1	1	1	1	1	1
oppF	oppF	Oligopeptide transport ATP-binding protein OppF;Oligopeptide ABC transporter ATP-binding protein;ATP-binding cassette domain-containing protein;Glutathione import ATP-binding protein GsiA;murein tripeptide/oligopeptide ABC transporter ATP-binding protein OppF	568	570	1.00352	1	3545	324	1005	1001.43	1	1	1	1	1	1	1	1	1	1	1	1	1	1	1	1	1	1	1	1	1	1	1	1	1	1	1	1	1	1	1	1	1	1	1	1	1	1	1
group_1284	tktA2	transketolase;Putative transketolase;Transketolase C-terminal subunit	568	570	1.00352	1	3544	117	1059	989.568	1	1	1	1	1	1	1	1	1	1	1	1	1	1	1	1	1	1	1	1	1	1	1	1	1	1	1	1	1	1	1	1	1	1	1	1	1	1	1
potH	potH	Putrescine ABC transporter membrane protein;Putrescine transporter permease PotH;putrescine ABC transporter permease PotH	568	570	1.00352	1	3543	474	954	950.811	1	1	1	1	1	1	1	1	1	1	1	1	1	1	1	1	1	1	1	1	1	1	1	1	1	1	1	1	1	1	1	1	1	1	1	1	1	1	1
dcuA	dcuA	anaerobic C4-dicarboxylate transporter family protein;Anaerobic c4-dicarboxylate transporter;Anaerobic C4-dicarboxylate transporter	568	569	1.00176	1	3540	375	1320	1317.67	1	1	1	1	1	1	1	1	1	1	1	1	1	1	1	1	1	1	1	1	1	1	1	1	1	1	1	1	1	1	1	1	1	1	1	1	1	1	1
group_1283	csgD	Regulatory protein;DNA-binding transcriptional regulator CsgD family	568	568	1	1	3539	360	594	593.584	1	1	1	1	1	1	1	1	1	1	1	1	1	1	1	1	1	1	1	1	1	1	1	1	1	1	1	1	1	1	1	1	1	1	1	1	1	1	1
group_1282		histidine kinase;Cytoplasmic protein	568	568	1	1	3538	249	279	249.053	1	1	1	1	1	1	1	1	1	1	1	1	1	1	1	1	1	1	1	1	1	1	1	1	1	1	1	1	1	1	1	1	1	1	1	1	1	1	1
csgD~~~sprB	csgD;sprB	Transcriptional regulator;DNA-binding transcriptional regulator CsgD family;transcriptional regulator	568	568	1	1	3537	468	756	754.732	1	1	1	1	1	1	1	1	1	1	1	1	1	1	1	1	1	1	1	1	1	1	1	1	1	1	1	1	1	1	1	1	1	1	1	1	1	1	1
hpaE	hpaE	5-carboxymethyl-2-hydroxymuconate semialdehyde dehydrogenase;aldehyde dehydrogenase family protein	568	570	1.00352	1	3536	408	1467	1461.69	1	1	1	1	1	1	1	1	1	1	1	1	1	1	1	1	1	1	1	1	1	1	1	1	1	1	1	1	1	1	1	1	1	1	1	1	1	1	1
group_1281		5-carboxymethyl-2-hydroxymuconate Delta-isomerase	568	568	1	1	3535	228	381	380.461	1	1	1	1	1	1	1	1	1	1	1	1	1	1	1	1	1	1	1	1	1	1	1	1	1	1	1	1	1	1	1	1	1	1	1	1	1	1	1
group_1279	ampD	16-anhydro-N-acetylmuramyl-L-alanine amidase AmpD;N-acetyl-anhydromuramyl-L-alanine amidase	568	569	1.00176	1	3532	168	564	562.845	1	1	1	1	1	1	1	1	1	1	1	1	1	1	1	1	1	1	1	1	1	1	1	1	1	1	1	1	1	1	1	1	1	1	1	1	1	1	1
pflB	pflB	hypothetical protein;formate C-acetyltransferase	568	568	1	1	3530	1524	2283	2281.66	1	1	1	1	1	1	1	1	1	1	1	1	1	1	1	1	1	1	1	1	1	1	1	1	1	1	1	1	1	1	1	1	1	1	1	1	1	1	1
phnV	phnV	2-aminoethylphosphonate ABC transporter permease protein II;2-aminoethylphosphonate ABC transport system membrane component PhnV	568	570	1.00352	1	3529	168	798	795.379	1	1	1	1	1	1	1	1	1	1	1	1	1	1	1	1	1	1	1	1	1	1	1	1	1	1	1	1	1	1	1	1	1	1	1	1	1	1	1
sitB	sitB	ABC transporter domain-containing protein;Iron transport ATP-binding protein;iron/manganese ABC transporter ATP-binding protein SitB	568	574	1.01056	1	3528	288	822	811.615	1	1	1	1	1	1	1	1	1	1	1	1	1	1	1	1	1	1	1	1	1	1	1	1	1	1	1	1	1	1	1	1	1	1	1	1	1	1	1
group_1276		Small toxic polypeptide LdrA/LdrC;Toxin Ldr type I toxin-antitoxin system	568	568	1	1	3526	108	108	108	1	1	1	1	1	1	1	1	1	1	1	1	1	1	1	1	1	1	1	1	1	1	1	1	1	1	1	1	1	1	1	1	1	1	1	1	1	1	1
group_1275	araJ	MFS domain-containing protein;putative arabinose efflux permease AraJ MFS family	568	568	1	1	3524	912	1236	1235.43	1	1	1	1	1	1	1	1	1	1	1	1	1	1	1	1	1	1	1	1	1	1	1	1	1	1	1	1	1	1	1	1	1	1	1	1	1	1	1
trpE	trpE	anthranilate synthase component I;Anthranilate synthase component 1;anthranilate synthase component 1	568	569	1.00176	1	3523	375	1578	1574.91	1	1	1	1	1	1	1	1	1	1	1	1	1	1	1	1	1	1	1	1	1	1	1	1	1	1	1	1	1	1	1	1	1	1	1	1	1	1	1
napG	napG	ferredoxin-type protein NapG	568	568	1	1	3522	567	696	695.546	1	1	1	1	1	1	1	1	1	1	1	1	1	1	1	1	1	1	1	1	1	1	1	1	1	1	1	1	1	1	1	1	1	1	1	1	1	1	1
cobO	cobO	cob(I)yrinic acid ac-diamide adenosyltransferase	568	568	1	1	3521	462	591	590.546	1	1	1	1	1	1	1	1	1	1	1	1	1	1	1	1	1	1	1	1	1	1	1	1	1	1	1	1	1	1	1	1	1	1	1	1	1	1	1
yebY	yebY	Putative periplasmic or exported protein;YebY family protein	568	568	1	1	3520	225	354	353.773	1	1	1	1	1	1	1	1	1	1	1	1	1	1	1	1	1	1	1	1	1	1	1	1	1	1	1	1	1	1	1	1	1	1	1	1	1	1	1
group_1274	uhpC	hypothetical protein;MFS transporter;Sugar phosphate permease	568	568	1	1	3519	126	1311	1246.19	1	1	1	1	1	1	1	1	1	1	1	1	1	1	1	1	1	1	1	1	1	1	1	1	1	1	1	1	1	1	1	1	1	1	1	1	1	1	1
ompW	ompW	outer membrane protein OmpW	568	568	1	1	3518	639	654	639.026	1	1	1	1	1	1	1	1	1	1	1	1	1	1	1	1	1	1	1	1	1	1	1	1	1	1	1	1	1	1	1	1	1	1	1	1	1	1	1
prc	prc	carboxy terminal-processing peptidase	568	568	1	1	3517	1983	2145	2048.82	1	1	1	1	1	1	1	1	1	1	1	1	1	1	1	1	1	1	1	1	1	1	1	1	1	1	1	1	1	1	1	1	1	1	1	1	1	1	1
recJ	recJ	single-stranded-DNA-specific exonuclease RecJ	568	568	1	1	3516	1602	1767	1602.29	1	1	1	1	1	1	1	1	1	1	1	1	1	1	1	1	1	1	1	1	1	1	1	1	1	1	1	1	1	1	1	1	1	1	1	1	1	1	1
aldB	aldB	Aldehyde dehydrogenase B;Lactaldehyde dehydrogenase;aldehyde dehydrogenase AldB	568	569	1.00176	1	3515	531	1539	1536.14	1	1	1	1	1	1	1	1	1	1	1	1	1	1	1	1	1	1	1	1	1	1	1	1	1	1	1	1	1	1	1	1	1	1	1	1	1	1	1
group_1273	lysR	LysR family transcriptional regulator;DNA-binding transcriptional regulator LysR family	568	568	1	1	3514	849	903	902.905	1	1	1	1	1	1	1	1	1	1	1	1	1	1	1	1	1	1	1	1	1	1	1	1	1	1	1	1	1	1	1	1	1	1	1	1	1	1	1
gltX	gltX	glutamate--tRNA ligase	568	568	1	1	3513	1296	1416	1415.79	1	1	1	1	1	1	1	1	1	1	1	1	1	1	1	1	1	1	1	1	1	1	1	1	1	1	1	1	1	1	1	1	1	1	1	1	1	1	1
motB	motB	Chemotaxis protein MotB (Motility protein B);MotB-plug domain-containing protein;flagellar motor protein MotB	568	570	1.00352	1	3511	240	930	926.342	1	1	1	1	1	1	1	1	1	1	1	1	1	1	1	1	1	1	1	1	1	1	1	1	1	1	1	1	1	1	1	1	1	1	1	1	1	1	1
yggE	yggE	oxidative stress defense protein	568	568	1	1	3510	747	837	747.158	1	1	1	1	1	1	1	1	1	1	1	1	1	1	1	1	1	1	1	1	1	1	1	1	1	1	1	1	1	1	1	1	1	1	1	1	1	1	1
eutB	eutB	Ethanolamine ammonia-lyase large subunit;Ethanolamine ammonia lyase large subunit;ethanolamine ammonia-lyase subunit alpha	568	569	1.00176	1	3509	573	1362	1359.41	1	1	1	1	1	1	1	1	1	1	1	1	1	1	1	1	1	1	1	1	1	1	1	1	1	1	1	1	1	1	1	1	1	1	1	1	1	1	1
fldB	fldB	flavodoxin FldB	568	568	1	1	3508	477	522	521.921	1	1	1	1	1	1	1	1	1	1	1	1	1	1	1	1	1	1	1	1	1	1	1	1	1	1	1	1	1	1	1	1	1	1	1	1	1	1	1
fbaB	fbaB	class I fructose-bisphosphate aldolase;Fructose-bisphosphate aldolase class I;hypothetical protein	568	573	1.0088	1	3507	162	1053	1042.4	1	1	1	1	1	1	1	1	1	1	1	1	1	1	1	1	1	1	1	1	1	1	1	1	1	1	1	1	1	1	1	1	1	1	1	1	1	1	1
amiA	amiA	N-acetylmuramoyl-L-alanine amidase AmiA	568	568	1	1	3506	693	870	869.688	1	1	1	1	1	1	1	1	1	1	1	1	1	1	1	1	1	1	1	1	1	1	1	1	1	1	1	1	1	1	1	1	1	1	1	1	1	1	1
srmB	srmB	ATP-dependent RNA helicase SrmB	568	568	1	1	3505	1335	1383	1335.08	1	1	1	1	1	1	1	1	1	1	1	1	1	1	1	1	1	1	1	1	1	1	1	1	1	1	1	1	1	1	1	1	1	1	1	1	1	1	1
group_1271	citT	cation transporter;Di- and tricarboxylate antiporter	568	568	1	1	3504	1221	1275	1221.1	1	1	1	1	1	1	1	1	1	1	1	1	1	1	1	1	1	1	1	1	1	1	1	1	1	1	1	1	1	1	1	1	1	1	1	1	1	1	1
pduW	pduW	acetate/propionate family kinase;propanediol utilization propionate kinase PduW	568	568	1	1	3502	1083	1215	1214.77	1	1	1	1	1	1	1	1	1	1	1	1	1	1	1	1	1	1	1	1	1	1	1	1	1	1	1	1	1	1	1	1	1	1	1	1	1	1	1
group_1269	racX	aspartate racemase;Amino acid racemase YgeA	568	568	1	1	3500	528	735	734.636	1	1	1	1	1	1	1	1	1	1	1	1	1	1	1	1	1	1	1	1	1	1	1	1	1	1	1	1	1	1	1	1	1	1	1	1	1	1	1
group_1268	araJ	MFS transport protein AraJ;MFS transporter;MFS transporter AraJ	568	569	1.00176	1	3499	465	1173	1170.67	1	1	1	1	1	1	1	1	1	1	1	1	1	1	1	1	1	1	1	1	1	1	1	1	1	1	1	1	1	1	1	1	1	1	1	1	1	1	1
galE	galE	UDP-glucose 4-epimerase GalE;GDP-mannose 46-dehydratase;UDP-galactose-4-epimerase	568	570	1.00352	1	3498	309	1017	1013.42	1	1	1	1	1	1	1	1	1	1	1	1	1	1	1	1	1	1	1	1	1	1	1	1	1	1	1	1	1	1	1	1	1	1	1	1	1	1	1
ppnP	ppnP	pyrimidine/purine nucleoside phosphorylase	568	568	1	1	3496	246	285	284.931	1	1	1	1	1	1	1	1	1	1	1	1	1	1	1	1	1	1	1	1	1	1	1	1	1	1	1	1	1	1	1	1	1	1	1	1	1	1	1
group_1267	yhaK	quercetin 23-dioxygenase;Redox-sensitive bicupin YhaK pirin superfamily	568	568	1	1	3495	795	861	860.884	1	1	1	1	1	1	1	1	1	1	1	1	1	1	1	1	1	1	1	1	1	1	1	1	1	1	1	1	1	1	1	1	1	1	1	1	1	1	1
group_1265	frwB	hypothetical protein;Phosphotransferase system fructose-specific component IIB	568	568	1	1	3493	1428	1641	1428.38	1	1	1	1	1	1	1	1	1	1	1	1	1	1	1	1	1	1	1	1	1	1	1	1	1	1	1	1	1	1	1	1	1	1	1	1	1	1	1
group_1264	narK	Permease;Nitrate/nitrite transporter NarK	568	599	1.05458	1	3492	483	1197	1134.74	1	1	1	1	1	1	1	1	1	1	1	1	1	1	1	1	1	1	1	1	1	1	1	1	1	1	1	1	1	1	1	1	1	1	1	1	1	1	1
yghB	yghB	DedA family protein;DedA family inner membrane protein YghB;Inner membrane protein YghB	568	569	1.00176	1	3491	255	660	658.93	1	1	1	1	1	1	1	1	1	1	1	1	1	1	1	1	1	1	1	1	1	1	1	1	1	1	1	1	1	1	1	1	1	1	1	1	1	1	1
gsiB	gsiB	glutathione ABC transporter substrate-binding protein GsiB;Dipeptide-binding ABC transporter periplasmic substrate-binding component	568	569	1.00176	1	3490	291	1539	1536.31	1	1	1	1	1	1	1	1	1	1	1	1	1	1	1	1	1	1	1	1	1	1	1	1	1	1	1	1	1	1	1	1	1	1	1	1	1	1	1
group_1263		M48 family metalloprotease;Peptidase-M48 domain-containing protein	568	568	1	1	3489	495	759	758.535	1	1	1	1	1	1	1	1	1	1	1	1	1	1	1	1	1	1	1	1	1	1	1	1	1	1	1	1	1	1	1	1	1	1	1	1	1	1	1
group_1262	menH	alpha/beta hydrolase;2-succinyl-6-hydroxy-24-cyclohexadiene-1-carboxylate synthase MenH and related esterases alpha/beta hydrolase fold	568	568	1	1	3488	816	891	890.736	1	1	1	1	1	1	1	1	1	1	1	1	1	1	1	1	1	1	1	1	1	1	1	1	1	1	1	1	1	1	1	1	1	1	1	1	1	1	1
fumC	fumC	class II fumarate hydratase	568	571	1.00528	1	3485	186	1404	1396.41	1	1	1	1	1	1	1	1	1	1	1	1	1	1	1	1	1	1	1	1	1	1	1	1	1	1	1	1	1	1	1	1	1	1	1	1	1	1	1
dgaF	dgaF	DUF1341 domain-containing protein;2-dehydro-3-deoxy-phosphogluconate aldolase;hypothetical protein	568	570	1.00352	1	3484	168	744	741.379	1	1	1	1	1	1	1	1	1	1	1	1	1	1	1	1	1	1	1	1	1	1	1	1	1	1	1	1	1	1	1	1	1	1	1	1	1	1	1
argF	argF	ornithine carbamoyltransferase;Ornithine carbamoyltransferase	568	569	1.00176	1	3483	294	1005	1003.22	1	1	1	1	1	1	1	1	1	1	1	1	1	1	1	1	1	1	1	1	1	1	1	1	1	1	1	1	1	1	1	1	1	1	1	1	1	1	1
group_1260	fes	enterochelin esterase;Enterochelin esterase;Enterochelin esterase or related enzyme	568	569	1.00176	1	3481	222	1245	1242.89	1	1	1	1	1	1	1	1	1	1	1	1	1	1	1	1	1	1	1	1	1	1	1	1	1	1	1	1	1	1	1	1	1	1	1	1	1	1	1
rpsT	rpsT	30S ribosomal protein S20;Secreted protein	568	568	1	1	3480	210	264	210.095	1	1	1	1	1	1	1	1	1	1	1	1	1	1	1	1	1	1	1	1	1	1	1	1	1	1	1	1	1	1	1	1	1	1	1	1	1	1	1
pcnB	pcnB	polynucleotide adenylyltransferase PcnB;Poly(A) polymerase I	568	568	1	1	3479	912	1890	1418.94	1	1	1	1	1	1	1	1	1	1	1	1	1	1	1	1	1	1	1	1	1	1	1	1	1	1	1	1	1	1	1	1	1	1	1	1	1	1	1
dnaT~~~yjjB	dnaT;yjjB	primosomal protein DnaT;threonine/serine exporter	568	568	1	1	3477	474	1107	475.114	1	1	1	1	1	1	1	1	1	1	1	1	1	1	1	1	1	1	1	1	1	1	1	1	1	1	1	1	1	1	1	1	1	1	1	1	1	1	1
ydgI	ydgI	Putative arginine/ornithine antiporter	568	568	1	1	3476	1332	1383	1382.82	1	1	1	1	1	1	1	1	1	1	1	1	1	1	1	1	1	1	1	1	1	1	1	1	1	1	1	1	1	1	1	1	1	1	1	1	1	1	1
pntA	pntA	Re/Si-specific NAD(P)(+) transhydrogenase subunit alpha	568	568	1	1	3475	1491	1530	1529.93	1	1	1	1	1	1	1	1	1	1	1	1	1	1	1	1	1	1	1	1	1	1	1	1	1	1	1	1	1	1	1	1	1	1	1	1	1	1	1
uvrD	uvrD	DNA helicase II	568	568	1	1	3474	1908	2163	2162.55	1	1	1	1	1	1	1	1	1	1	1	1	1	1	1	1	1	1	1	1	1	1	1	1	1	1	1	1	1	1	1	1	1	1	1	1	1	1	1
group_1258		nitrite reductase;Nitrite reductase	568	568	1	1	3473	1152	1203	1202.55	1	1	1	1	1	1	1	1	1	1	1	1	1	1	1	1	1	1	1	1	1	1	1	1	1	1	1	1	1	1	1	1	1	1	1	1	1	1	1
group_1256	fixA	electron transfer flavoprotein subunit beta/FixA family protein;Electron transfer flavoprotein alpha and beta subunits	568	568	1	1	3471	363	750	728.879	1	1	1	1	1	1	1	1	1	1	1	1	1	1	1	1	1	1	1	1	1	1	1	1	1	1	1	1	1	1	1	1	1	1	1	1	1	1	1
rseA	rseA	anti-sigma-E factor RseA	568	568	1	1	3470	651	717	651.232	1	1	1	1	1	1	1	1	1	1	1	1	1	1	1	1	1	1	1	1	1	1	1	1	1	1	1	1	1	1	1	1	1	1	1	1	1	1	1
macA	macA	Macrolide-specific efflux protein MacA;macrolide transporter subunit MacA	568	569	1.00176	1	3469	144	1119	1116.99	1	1	1	1	1	1	1	1	1	1	1	1	1	1	1	1	1	1	1	1	1	1	1	1	1	1	1	1	1	1	1	1	1	1	1	1	1	1	1
group_1255		multiple stress resistance protein BhsA;YdgH-BhsA-like domain-containing protein	568	568	1	1	3468	258	339	258.143	1	1	1	1	1	1	1	1	1	1	1	1	1	1	1	1	1	1	1	1	1	1	1	1	1	1	1	1	1	1	1	1	1	1	1	1	1	1	1
prmA	prmA	50S ribosomal protein L11 methyltransferase	568	569	1.00176	1	3466	441	882	880.529	1	1	1	1	1	1	1	1	1	1	1	1	1	1	1	1	1	1	1	1	1	1	1	1	1	1	1	1	1	1	1	1	1	1	1	1	1	1	1
group_1254	citD	citrate lyase acyl carrier protein	568	568	1	1	3465	177	294	293.382	1	1	1	1	1	1	1	1	1	1	1	1	1	1	1	1	1	1	1	1	1	1	1	1	1	1	1	1	1	1	1	1	1	1	1	1	1	1	1
cydD	cydD	Transport ATP-binding protein CydC;cysteine/glutathione ABC transporter permease/ATP-binding protein CydD	568	568	1	1	3464	1788	3474	1790.97	1	1	1	1	1	1	1	1	1	1	1	1	1	1	1	1	1	1	1	1	1	1	1	1	1	1	1	1	1	1	1	1	1	1	1	1	1	1	1
tlyC~~~yoaE	tlyC;yoaE	Hemolysin-related protein contains CBS domains UPF0053 family;Magnesium and cobalt efflux protein CorC;Inner membrane protein;CNNM family cation transport protein YoaE	568	574	1.01056	1	3462	351	1560	1539.78	1	1	1	1	1	1	1	1	1	1	1	1	1	1	1	1	1	1	1	1	1	1	1	1	1	1	1	1	1	1	1	1	1	1	1	1	1	1	1
rbsK~~~gsk	rbsK;gsk	inosine/guanosine kinase;Inosine-guanosine kinase	568	572	1.00704	1	3461	225	1548	1341.52	1	1	1	1	1	1	1	1	1	1	1	1	1	1	1	1	1	1	1	1	1	1	1	1	1	1	1	1	1	1	1	1	1	1	1	1	1	1	1
group_1253		GATase1-like domain-containing protein;Uncharacterized membrane protein;putative protein STM3548 contains class I glutamine amidotransferase domain	568	569	1.00176	1	3460	300	762	760.561	1	1	1	1	1	1	1	1	1	1	1	1	1	1	1	1	1	1	1	1	1	1	1	1	1	1	1	1	1	1	1	1	1	1	1	1	1	1	1
prpE	prpE	Propionate--CoA ligase;Propionyl-CoA synthetase;propionate--CoA ligase	568	571	1.00528	1	3459	768	1887	1877.2	1	1	1	1	1	1	1	1	1	1	1	1	1	1	1	1	1	1	1	1	1	1	1	1	1	1	1	1	1	1	1	1	1	1	1	1	1	1	1
group_1252		hypothetical protein;Putative flagellin structural protein	568	568	1	1	3458	1653	2979	2976.67	1	1	1	1	1	1	1	1	1	1	1	1	1	1	1	1	1	1	1	1	1	1	1	1	1	1	1	1	1	1	1	1	1	1	1	1	1	1	1
csrD	csrD	RNase E specificity factor CsrD;hypothetical protein	568	569	1.00176	1	3457	435	1941	1937.56	1	1	1	1	1	1	1	1	1	1	1	1	1	1	1	1	1	1	1	1	1	1	1	1	1	1	1	1	1	1	1	1	1	1	1	1	1	1	1
group_1251	yehR	DUF1307 domain-containing protein	568	568	1	1	3456	630	711	710.857	1	1	1	1	1	1	1	1	1	1	1	1	1	1	1	1	1	1	1	1	1	1	1	1	1	1	1	1	1	1	1	1	1	1	1	1	1	1	1
nuoG	nuoG	NADH dehydrogenase/NADH:ubiquinone oxidoreductase 75 kD subunit (chain G);NADH-quinone oxidoreductase subunit G;NADH-quinone oxidoreductase subunit NuoG	568	569	1.00176	1	3455	414	2727	2722.16	1	1	1	1	1	1	1	1	1	1	1	1	1	1	1	1	1	1	1	1	1	1	1	1	1	1	1	1	1	1	1	1	1	1	1	1	1	1	1
kdsD	kdsD	arabinose-5-phosphate isomerase KdsD	568	568	1	1	3454	987	990	987.005	1	1	1	1	1	1	1	1	1	1	1	1	1	1	1	1	1	1	1	1	1	1	1	1	1	1	1	1	1	1	1	1	1	1	1	1	1	1	1
hybB	hybB	hypothetical protein;Ni/Fe-hydrogenase cytochrome b subunit	568	569	1.00176	1	3453	222	1179	1176.59	1	1	1	1	1	1	1	1	1	1	1	1	1	1	1	1	1	1	1	1	1	1	1	1	1	1	1	1	1	1	1	1	1	1	1	1	1	1	1
yhaH	yhaH	DUF805 domain-containing protein	568	568	1	1	3452	138	369	368.593	1	1	1	1	1	1	1	1	1	1	1	1	1	1	1	1	1	1	1	1	1	1	1	1	1	1	1	1	1	1	1	1	1	1	1	1	1	1	1
group_1250	xylB	hypothetical protein;Sugar (pentulose or hexulose) kinase	568	568	1	1	3451	501	1497	1495.25	1	1	1	1	1	1	1	1	1	1	1	1	1	1	1	1	1	1	1	1	1	1	1	1	1	1	1	1	1	1	1	1	1	1	1	1	1	1	1
fliH	fliH	hypothetical protein;flagellar assembly protein FliH	568	569	1.00176	1	3450	147	708	706.466	1	1	1	1	1	1	1	1	1	1	1	1	1	1	1	1	1	1	1	1	1	1	1	1	1	1	1	1	1	1	1	1	1	1	1	1	1	1	1
proW~~~proV	proW;proV	glycine betaine/L-proline ABC transporter permease ProW;glycine betaine/L-proline ABC transporter ATP-binding protein ProV;Glycine betaine/L-proline transporter permease P	568	569	1.00176	1	3449	345	2262	1065.27	1	1	1	1	1	1	1	1	1	1	1	1	1	1	1	1	1	1	1	1	1	1	1	1	1	1	1	1	1	1	1	1	1	1	1	1	1	1	1
yiaA	yiaA	hypothetical protein;putative membrane protein YiaA	568	570	1.00352	1	3448	159	354	352.832	1	1	1	1	1	1	1	1	1	1	1	1	1	1	1	1	1	1	1	1	1	1	1	1	1	1	1	1	1	1	1	1	1	1	1	1	1	1	1
znuC	znuC	zinc ABC transporter ATP-binding protein ZnuC	568	568	1	1	3447	612	756	755.746	1	1	1	1	1	1	1	1	1	1	1	1	1	1	1	1	1	1	1	1	1	1	1	1	1	1	1	1	1	1	1	1	1	1	1	1	1	1	1
rbn	rbn	ribonuclease BN	568	568	1	1	3446	780	918	917.757	1	1	1	1	1	1	1	1	1	1	1	1	1	1	1	1	1	1	1	1	1	1	1	1	1	1	1	1	1	1	1	1	1	1	1	1	1	1	1
hflK	hflK	FtsH protease activity modulator HflK;Protease	568	569	1.00176	1	3445	264	1260	1257.52	1	1	1	1	1	1	1	1	1	1	1	1	1	1	1	1	1	1	1	1	1	1	1	1	1	1	1	1	1	1	1	1	1	1	1	1	1	1	1
mraZ	mraZ	division/cell wall cluster transcriptional repressor MraZ	568	568	1	1	3444	444	459	458.974	1	1	1	1	1	1	1	1	1	1	1	1	1	1	1	1	1	1	1	1	1	1	1	1	1	1	1	1	1	1	1	1	1	1	1	1	1	1	1
group_1249	rbsK	sugar kinase;Sugar kinase	568	568	1	1	3443	234	966	279.106	1	1	1	1	1	1	1	1	1	1	1	1	1	1	1	1	1	1	1	1	1	1	1	1	1	1	1	1	1	1	1	1	1	1	1	1	1	1	1
gph	gph	phosphoglycolate phosphatase	568	568	1	1	3442	741	759	758.968	1	1	1	1	1	1	1	1	1	1	1	1	1	1	1	1	1	1	1	1	1	1	1	1	1	1	1	1	1	1	1	1	1	1	1	1	1	1	1
srfJ	srfJ	lysosomal glucosyl ceramidase-like type III secretion effector SrfJ;Lysosomal glucosyl ceramidase	568	568	1	1	3441	1038	1344	1062.24	1	1	1	1	1	1	1	1	1	1	1	1	1	1	1	1	1	1	1	1	1	1	1	1	1	1	1	1	1	1	1	1	1	1	1	1	1	1	1
ydcK	ydcK	Putative transferase;YdcK family protein	568	568	1	1	3439	828	981	980.731	1	1	1	1	1	1	1	1	1	1	1	1	1	1	1	1	1	1	1	1	1	1	1	1	1	1	1	1	1	1	1	1	1	1	1	1	1	1	1
group_1247	baeS	histidine kinase;Signal transduction histidine kinase	568	568	1	1	3438	1344	1416	1415.87	1	1	1	1	1	1	1	1	1	1	1	1	1	1	1	1	1	1	1	1	1	1	1	1	1	1	1	1	1	1	1	1	1	1	1	1	1	1	1
group_1246	mtlD	fructuronate reductase;Mannitol-1-phosphate/altronate dehydrogenases	568	568	1	1	3437	1347	1473	1472.54	1	1	1	1	1	1	1	1	1	1	1	1	1	1	1	1	1	1	1	1	1	1	1	1	1	1	1	1	1	1	1	1	1	1	1	1	1	1	1
yjjJ	yjjJ	type II toxin-antitoxin system HipA family toxin YjjJ	568	568	1	1	3436	960	1329	1324.69	1	1	1	1	1	1	1	1	1	1	1	1	1	1	1	1	1	1	1	1	1	1	1	1	1	1	1	1	1	1	1	1	1	1	1	1	1	1	1
idnK	idnK	Gluconokinase;gluconokinase	568	569	1.00176	1	3435	228	531	530.13	1	1	1	1	1	1	1	1	1	1	1	1	1	1	1	1	1	1	1	1	1	1	1	1	1	1	1	1	1	1	1	1	1	1	1	1	1	1	1
group_1245		Homeodomain-like protein;Transposase	568	568	1	1	3434	276	501	500.603	1	1	1	1	1	1	1	1	1	1	1	1	1	1	1	1	1	1	1	1	1	1	1	1	1	1	1	1	1	1	1	1	1	1	1	1	1	1	1
iolD	iolD	Malonic semialdehyde oxidative decarboxylase;3D-(35/4)-trihydroxycyclohexane-12-dione acylhydrolase (decyclizing)	568	568	1	1	3433	1503	1941	1940.14	1	1	1	1	1	1	1	1	1	1	1	1	1	1	1	1	1	1	1	1	1	1	1	1	1	1	1	1	1	1	1	1	1	1	1	1	1	1	1
wcaA	wcaA	glycosyltransferase	568	568	1	1	3432	915	1035	1034.68	1	1	1	1	1	1	1	1	1	1	1	1	1	1	1	1	1	1	1	1	1	1	1	1	1	1	1	1	1	1	1	1	1	1	1	1	1	1	1
gmhB	gmhB	D-glycero-beta-D-manno-heptose 17-bisphosphate 7-phosphatase	568	568	1	1	3431	567	585	567.032	1	1	1	1	1	1	1	1	1	1	1	1	1	1	1	1	1	1	1	1	1	1	1	1	1	1	1	1	1	1	1	1	1	1	1	1	1	1	1
pntB	pntB	Re/Si-specific NAD(P)(+) transhydrogenase subunit beta;Proton-translocating NAD(P)(+) transhydrogenase	568	569	1.00176	1	3429	327	1389	1386.62	1	1	1	1	1	1	1	1	1	1	1	1	1	1	1	1	1	1	1	1	1	1	1	1	1	1	1	1	1	1	1	1	1	1	1	1	1	1	1
pnuC	pnuC	nicotinamide riboside transporter PnuC	568	568	1	1	3427	651	720	719.879	1	1	1	1	1	1	1	1	1	1	1	1	1	1	1	1	1	1	1	1	1	1	1	1	1	1	1	1	1	1	1	1	1	1	1	1	1	1	1
group_1243	ibpA	Small heat shock protein;Small heat shock protein IbpA HSP20 family	568	568	1	1	3426	345	468	467.783	1	1	1	1	1	1	1	1	1	1	1	1	1	1	1	1	1	1	1	1	1	1	1	1	1	1	1	1	1	1	1	1	1	1	1	1	1	1	1
group_1242	cybB	Hydrogenase;Cytochrome b561	568	568	1	1	3425	372	531	530.72	1	1	1	1	1	1	1	1	1	1	1	1	1	1	1	1	1	1	1	1	1	1	1	1	1	1	1	1	1	1	1	1	1	1	1	1	1	1	1
yceB	yceB	lipoprotein	568	568	1	1	3423	561	627	561.116	1	1	1	1	1	1	1	1	1	1	1	1	1	1	1	1	1	1	1	1	1	1	1	1	1	1	1	1	1	1	1	1	1	1	1	1	1	1	1
cobB	cobB	NAD-dependent protein deacylase	568	568	1	1	3422	735	822	821.847	1	1	1	1	1	1	1	1	1	1	1	1	1	1	1	1	1	1	1	1	1	1	1	1	1	1	1	1	1	1	1	1	1	1	1	1	1	1	1
rfaC	rfaC	hypothetical protein;lipopolysaccharide heptosyltransferase RfaC	568	568	1	1	3421	471	954	953.15	1	1	1	1	1	1	1	1	1	1	1	1	1	1	1	1	1	1	1	1	1	1	1	1	1	1	1	1	1	1	1	1	1	1	1	1	1	1	1
cheR	cheR	Chemotaxis protein methyltransferase;Protein-glutamate O-methyltransferase;protein-glutamate O-methyltransferase CheR	568	569	1.00176	1	3420	255	867	865.587	1	1	1	1	1	1	1	1	1	1	1	1	1	1	1	1	1	1	1	1	1	1	1	1	1	1	1	1	1	1	1	1	1	1	1	1	1	1	1
group_1240	virK	VirK family antimicrobial peptide resistance protein;DUF535 domain-containing protein	568	568	1	1	3418	777	930	929.604	1	1	1	1	1	1	1	1	1	1	1	1	1	1	1	1	1	1	1	1	1	1	1	1	1	1	1	1	1	1	1	1	1	1	1	1	1	1	1
yggX	yggX	Putative Fe(2+)-trafficking protein YggX;oxidative damage protection protein	568	569	1.00176	1	3417	126	276	275.489	1	1	1	1	1	1	1	1	1	1	1	1	1	1	1	1	1	1	1	1	1	1	1	1	1	1	1	1	1	1	1	1	1	1	1	1	1	1	1
cbiF	cbiF	Cobalt-precorrin-4 C(11)-methyltransferase;cobalt-precorrin-4 methyltransferase	568	568	1	1	3415	774	1335	774.988	1	1	1	1	1	1	1	1	1	1	1	1	1	1	1	1	1	1	1	1	1	1	1	1	1	1	1	1	1	1	1	1	1	1	1	1	1	1	1
fhuF	fhuF	Ferric iron reductase protein;siderophore-iron reductase FhuF	568	568	1	1	3414	612	789	788.688	1	1	1	1	1	1	1	1	1	1	1	1	1	1	1	1	1	1	1	1	1	1	1	1	1	1	1	1	1	1	1	1	1	1	1	1	1	1	1
group_1238	lysR	transcriptional regulator;hypothetical protein;Transcriptional regulator;DNA-binding transcriptional regulator LysR family	568	571	1.00528	1	3413	345	879	873.846	1	1	1	1	1	1	1	1	1	1	1	1	1	1	1	1	1	1	1	1	1	1	1	1	1	1	1	1	1	1	1	1	1	1	1	1	1	1	1
glpT	glpT	glycerol-3-phosphate transporter;MFS transporter;Truncated glycerol-3-phosphate transporter;sn-glycerol-3-phosphate transporter;Glycerol-3-phosphate transporter	568	577	1.01585	1	3412	108	1359	1336.45	1	1	1	1	1	1	1	1	1	1	1	1	1	1	1	1	1	1	1	1	1	1	1	1	1	1	1	1	1	1	1	1	1	1	1	1	1	1	1
ugpQ	ugpQ	glycerophosphodiester phosphodiesterase	568	568	1	1	3411	741	762	741.037	1	1	1	1	1	1	1	1	1	1	1	1	1	1	1	1	1	1	1	1	1	1	1	1	1	1	1	1	1	1	1	1	1	1	1	1	1	1	1
citD	citD	citrate lyase acyl carrier protein 1	568	568	1	1	3410	282	297	296.974	1	1	1	1	1	1	1	1	1	1	1	1	1	1	1	1	1	1	1	1	1	1	1	1	1	1	1	1	1	1	1	1	1	1	1	1	1	1	1
group_1236		Exodeoxyribonuclease 8;Exonuclease VIII	568	568	1	1	3408	681	1107	1106.25	1	1	1	1	1	1	1	1	1	1	1	1	1	1	1	1	1	1	1	1	1	1	1	1	1	1	1	1	1	1	1	1	1	1	1	1	1	1	1
group_1235	murE	UDP-N-acetylmuramoyl-tripeptide--D-alanyl-D-alanine ligase;Mur ligase family protein;UDP-N-acetylmuramoyl-L-alanyl-D-glutamate--26-diaminopimelate ligase	568	569	1.00176	1	3405	558	1359	1356.47	1	1	1	1	1	1	1	1	1	1	1	1	1	1	1	1	1	1	1	1	1	1	1	1	1	1	1	1	1	1	1	1	1	1	1	1	1	1	1
nupG	nupG	Nucleoside permease;Nucleoside permease NupG	568	569	1.00176	1	3403	393	1257	1254.82	1	1	1	1	1	1	1	1	1	1	1	1	1	1	1	1	1	1	1	1	1	1	1	1	1	1	1	1	1	1	1	1	1	1	1	1	1	1	1
sppA	sppA	signal peptide peptidase SppA	568	568	1	1	3402	1656	1857	1856.65	1	1	1	1	1	1	1	1	1	1	1	1	1	1	1	1	1	1	1	1	1	1	1	1	1	1	1	1	1	1	1	1	1	1	1	1	1	1	1
leuA	leuA	2-isopropylmalate synthase	568	568	1	1	3401	1047	1572	1571.08	1	1	1	1	1	1	1	1	1	1	1	1	1	1	1	1	1	1	1	1	1	1	1	1	1	1	1	1	1	1	1	1	1	1	1	1	1	1	1
allS	allS	HTH-type transcriptional activator AllS	568	568	1	1	3399	693	927	924.496	1	1	1	1	1	1	1	1	1	1	1	1	1	1	1	1	1	1	1	1	1	1	1	1	1	1	1	1	1	1	1	1	1	1	1	1	1	1	1
ubiI	ubiI	FAD-dependent 2-octaprenylphenol hydroxylase	568	568	1	1	3398	1116	1203	1202.85	1	1	1	1	1	1	1	1	1	1	1	1	1	1	1	1	1	1	1	1	1	1	1	1	1	1	1	1	1	1	1	1	1	1	1	1	1	1	1
flgH	flgH	flagellar basal body L-ring protein FlgH	568	568	1	1	3397	564	666	665.82	1	1	1	1	1	1	1	1	1	1	1	1	1	1	1	1	1	1	1	1	1	1	1	1	1	1	1	1	1	1	1	1	1	1	1	1	1	1	1
proA	proA	glutamate-5-semialdehyde dehydrogenase	568	568	1	1	3393	1197	1251	1250.9	1	1	1	1	1	1	1	1	1	1	1	1	1	1	1	1	1	1	1	1	1	1	1	1	1	1	1	1	1	1	1	1	1	1	1	1	1	1	1
group_1230	araJ	MFS transporter	568	568	1	1	3392	1179	1281	1280.82	1	1	1	1	1	1	1	1	1	1	1	1	1	1	1	1	1	1	1	1	1	1	1	1	1	1	1	1	1	1	1	1	1	1	1	1	1	1	1
group_1229	potE	amino acid transporter;hypothetical protein;Serine transporter YbeC amino acid:H+ symporter family	568	569	1.00176	1	3391	159	1422	1419.56	1	1	1	1	1	1	1	1	1	1	1	1	1	1	1	1	1	1	1	1	1	1	1	1	1	1	1	1	1	1	1	1	1	1	1	1	1	1	1
gH19	gH19	Chitinase GH19 family;Lytic enzyme	568	568	1	1	3390	231	288	231.1	1	1	1	1	1	1	1	1	1	1	1	1	1	1	1	1	1	1	1	1	1	1	1	1	1	1	1	1	1	1	1	1	1	1	1	1	1	1	1
glgB	glgB	14-alpha-glucan branching enzyme;14-alpha-glucan branching protein;Glycogen branching enzyme;14-alpha-glucan branching enzyme GlgB	568	573	1.0088	1	3389	300	2187	2167.35	1	1	1	1	1	1	1	1	1	1	1	1	1	1	1	1	1	1	1	1	1	1	1	1	1	1	1	1	1	1	1	1	1	1	1	1	1	1	1
group_1228		Major facilitator superfamily protein;MFS transporter;2-ketogluconate transporter	568	576	1.01408	1	3388	297	1338	1319.68	1	1	1	1	1	1	1	1	1	1	1	1	1	1	1	1	1	1	1	1	1	1	1	1	1	1	1	1	1	1	1	1	1	1	1	1	1	1	1
proC	proC	pyrroline-5-carboxylate reductase	568	568	1	1	3387	810	873	810.111	1	1	1	1	1	1	1	1	1	1	1	1	1	1	1	1	1	1	1	1	1	1	1	1	1	1	1	1	1	1	1	1	1	1	1	1	1	1	1
ldtB	ldtB	LD-transpeptidase YbiS;putative LD-transpeptidase YbiS;LD-transpeptidase	568	569	1.00176	1	3386	414	921	919.286	1	1	1	1	1	1	1	1	1	1	1	1	1	1	1	1	1	1	1	1	1	1	1	1	1	1	1	1	1	1	1	1	1	1	1	1	1	1	1
nlpA	nlpA	MetQ/NlpA family ABC transporter substrate-binding protein;ABC-type metal ion transport system periplasmic component/surface antigen	568	568	1	1	3381	651	831	830.683	1	1	1	1	1	1	1	1	1	1	1	1	1	1	1	1	1	1	1	1	1	1	1	1	1	1	1	1	1	1	1	1	1	1	1	1	1	1	1
group_1224		hypothetical protein;Ferredoxin	568	568	1	1	3379	132	327	325.283	1	1	1	1	1	1	1	1	1	1	1	1	1	1	1	1	1	1	1	1	1	1	1	1	1	1	1	1	1	1	1	1	1	1	1	1	1	1	1
entF	entF	Enterobactin synthetase component F;enterobactin non-ribosomal peptide synthetase EntF	568	568	1	1	3378	3207	3885	3882.61	1	1	1	1	1	1	1	1	1	1	1	1	1	1	1	1	1	1	1	1	1	1	1	1	1	1	1	1	1	1	1	1	1	1	1	1	1	1	1
arnC	arnC	Lipopolysaccharide modification protein;glycosyltransferase;undecaprenyl-phosphate 4-deoxy-4-formamido-L-arabinose transferase	568	569	1.00176	1	3377	192	984	982.165	1	1	1	1	1	1	1	1	1	1	1	1	1	1	1	1	1	1	1	1	1	1	1	1	1	1	1	1	1	1	1	1	1	1	1	1	1	1	1
ais~~~pmrG	ais;pmrG	Lipopolysaccharide core heptose(II)-phosphate phosphatase;lipopolysaccharide core heptose(II)-phosphate phosphatase	568	568	1	1	3376	543	606	605.889	1	1	1	1	1	1	1	1	1	1	1	1	1	1	1	1	1	1	1	1	1	1	1	1	1	1	1	1	1	1	1	1	1	1	1	1	1	1	1
bcp	bcp	Thioredoxin-dependent thiol peroxidase;thioredoxin-dependent thiol peroxidase	568	568	1	1	3375	261	471	470.504	1	1	1	1	1	1	1	1	1	1	1	1	1	1	1	1	1	1	1	1	1	1	1	1	1	1	1	1	1	1	1	1	1	1	1	1	1	1	1
caiT	caiT	L-carnitine/gamma-butyrobetaine antiporter	568	568	1	1	3374	1335	1518	1517.68	1	1	1	1	1	1	1	1	1	1	1	1	1	1	1	1	1	1	1	1	1	1	1	1	1	1	1	1	1	1	1	1	1	1	1	1	1	1	1
group_1223	gudD	Glucarate dehydratase 1;glucarate dehydratase	568	571	1.00528	1	3373	174	1341	1334.24	1	1	1	1	1	1	1	1	1	1	1	1	1	1	1	1	1	1	1	1	1	1	1	1	1	1	1	1	1	1	1	1	1	1	1	1	1	1	1
rnhB	rnhB	Ribonuclease;ribonuclease HII	568	569	1.00176	1	3369	231	597	595.898	1	1	1	1	1	1	1	1	1	1	1	1	1	1	1	1	1	1	1	1	1	1	1	1	1	1	1	1	1	1	1	1	1	1	1	1	1	1	1
cheZ	cheZ	protein phosphatase CheZ;Oxidoreductase	568	568	1	1	3368	195	753	195.982	1	1	1	1	1	1	1	1	1	1	1	1	1	1	1	1	1	1	1	1	1	1	1	1	1	1	1	1	1	1	1	1	1	1	1	1	1	1	1
raiA	raiA	ribosome-associated translation inhibitor RaiA;hypothetical protein	568	568	1	1	3366	339	453	339.238	1	1	1	1	1	1	1	1	1	1	1	1	1	1	1	1	1	1	1	1	1	1	1	1	1	1	1	1	1	1	1	1	1	1	1	1	1	1	1
yvrE	yvrE	gluconolactonase;Sugar lactone lactonase YvrE	568	568	1	1	3365	909	957	909.085	1	1	1	1	1	1	1	1	1	1	1	1	1	1	1	1	1	1	1	1	1	1	1	1	1	1	1	1	1	1	1	1	1	1	1	1	1	1	1
fadB	fadB	Enoyl-CoA hydratase;fatty acid oxidation complex subunit alpha FadB	568	569	1.00176	1	3364	450	2190	2186.22	1	1	1	1	1	1	1	1	1	1	1	1	1	1	1	1	1	1	1	1	1	1	1	1	1	1	1	1	1	1	1	1	1	1	1	1	1	1	1
group_1219		arylsulfatase;Arylsulfotransferase	568	568	1	1	3363	1539	1824	1823.25	1	1	1	1	1	1	1	1	1	1	1	1	1	1	1	1	1	1	1	1	1	1	1	1	1	1	1	1	1	1	1	1	1	1	1	1	1	1	1
dkgA	dkgA	25-diketo-D-gluconic acid reductase A;25-didehydrogluconate reductase DkgA	568	570	1.00352	1	3362	360	828	825.074	1	1	1	1	1	1	1	1	1	1	1	1	1	1	1	1	1	1	1	1	1	1	1	1	1	1	1	1	1	1	1	1	1	1	1	1	1	1	1
iolI1	iolI1	Endonuclease;2-keto-myo-inositol isomerase IolI1	568	570	1.00352	1	3361	357	834	831.084	1	1	1	1	1	1	1	1	1	1	1	1	1	1	1	1	1	1	1	1	1	1	1	1	1	1	1	1	1	1	1	1	1	1	1	1	1	1	1
nhaR	nhaR	LysR family transcriptional regulator;transcriptional activator NhaR	568	575	1.01232	1	3360	237	894	883.08	1	1	1	1	1	1	1	1	1	1	1	1	1	1	1	1	1	1	1	1	1	1	1	1	1	1	1	1	1	1	1	1	1	1	1	1	1	1	1
ansP~~~pheP	ansP;pheP	L-asparagine transporter or related permease;Phenylalanine transporter;phenylalanine transporter	568	569	1.00176	1	3359	360	1395	1392.46	1	1	1	1	1	1	1	1	1	1	1	1	1	1	1	1	1	1	1	1	1	1	1	1	1	1	1	1	1	1	1	1	1	1	1	1	1	1	1
bax	bax	protein bax;hypothetical protein	568	570	1.00352	1	3356	306	825	822.295	1	1	1	1	1	1	1	1	1	1	1	1	1	1	1	1	1	1	1	1	1	1	1	1	1	1	1	1	1	1	1	1	1	1	1	1	1	1	1
torR	torR	two-component system response regulator TorR	568	568	1	1	3355	693	729	693.697	1	1	1	1	1	1	1	1	1	1	1	1	1	1	1	1	1	1	1	1	1	1	1	1	1	1	1	1	1	1	1	1	1	1	1	1	1	1	1
group_1216	uhpC	MFS transporter;Sugar phosphate permease	568	568	1	1	3354	1125	1263	1262.47	1	1	1	1	1	1	1	1	1	1	1	1	1	1	1	1	1	1	1	1	1	1	1	1	1	1	1	1	1	1	1	1	1	1	1	1	1	1	1
aphA	aphA	acid phosphatase AphA	568	568	1	1	3353	678	714	713.937	1	1	1	1	1	1	1	1	1	1	1	1	1	1	1	1	1	1	1	1	1	1	1	1	1	1	1	1	1	1	1	1	1	1	1	1	1	1	1
bglB	bglB	6-phospho-beta-glucosidase;Beta-glucosidase/6-phospho-beta-glucosidase/beta-galactosidase	568	568	1	1	3352	1332	1383	1382.82	1	1	1	1	1	1	1	1	1	1	1	1	1	1	1	1	1	1	1	1	1	1	1	1	1	1	1	1	1	1	1	1	1	1	1	1	1	1	1
deoR	deoR	DNA-binding transcriptional repressor DeoR	568	568	1	1	3350	759	894	759.238	1	1	1	1	1	1	1	1	1	1	1	1	1	1	1	1	1	1	1	1	1	1	1	1	1	1	1	1	1	1	1	1	1	1	1	1	1	1	1
group_1214	ubiH	2-octaprenyl-6-methoxyphenyl hydroxylase	568	568	1	1	3349	912	1179	1178.53	1	1	1	1	1	1	1	1	1	1	1	1	1	1	1	1	1	1	1	1	1	1	1	1	1	1	1	1	1	1	1	1	1	1	1	1	1	1	1
aac6	aac(6')	Aminoglycoside 6'-N-acetyltransferase;cryptic aminoglycoside N-acetyltransferase AAC(6')-Iy/Iaa	568	568	1	1	3348	201	438	425.065	1	1	1	1	1	1	1	1	1	1	1	1	1	1	1	1	1	1	1	1	1	1	1	1	1	1	1	1	1	1	1	1	1	1	1	1	1	1	1
group_1213	yceI	YceI domain-containing protein;Polyisoprenoid-binding periplasmic protein YceI	568	568	1	1	3347	552	567	566.974	1	1	1	1	1	1	1	1	1	1	1	1	1	1	1	1	1	1	1	1	1	1	1	1	1	1	1	1	1	1	1	1	1	1	1	1	1	1	1
group_1210		metallo-dependent hydrolase	568	568	1	1	3344	1008	1164	1163.73	1	1	1	1	1	1	1	1	1	1	1	1	1	1	1	1	1	1	1	1	1	1	1	1	1	1	1	1	1	1	1	1	1	1	1	1	1	1	1
group_1208	ybjK	DNA-binding transcriptional regulator;DNA-binding transcriptional regulator YbjK	568	568	1	1	3342	621	675	621.095	1	1	1	1	1	1	1	1	1	1	1	1	1	1	1	1	1	1	1	1	1	1	1	1	1	1	1	1	1	1	1	1	1	1	1	1	1	1	1
ydiL	ydiL	Abortive infection protein;Membrane protease YdiL CAAX protease family	568	568	1	1	3340	621	657	656.873	1	1	1	1	1	1	1	1	1	1	1	1	1	1	1	1	1	1	1	1	1	1	1	1	1	1	1	1	1	1	1	1	1	1	1	1	1	1	1
nagA	nagA	N-acetylglucosamine-6-phosphate deacetylase	568	568	1	1	3338	1155	1215	1212.36	1	1	1	1	1	1	1	1	1	1	1	1	1	1	1	1	1	1	1	1	1	1	1	1	1	1	1	1	1	1	1	1	1	1	1	1	1	1	1
fAU1	fAU1	5-formyltetrahydrofolate cyclo-ligase	568	568	1	1	3335	549	597	549.507	1	1	1	1	1	1	1	1	1	1	1	1	1	1	1	1	1	1	1	1	1	1	1	1	1	1	1	1	1	1	1	1	1	1	1	1	1	1	1
group_1204	allD	ureidoglycolate dehydrogenase;Ureidoglycolate dehydrogenase;hypothetical protein	568	570	1.00352	1	3334	336	1050	1046.41	1	1	1	1	1	1	1	1	1	1	1	1	1	1	1	1	1	1	1	1	1	1	1	1	1	1	1	1	1	1	1	1	1	1	1	1	1	1	1
spo0J	spo0J	ParB/Sulfiredoxin domain-containing protein;Chromosome segregation protein Spo0J contains ParB-like nuclease domain	568	568	1	1	3333	591	618	617.952	1	1	1	1	1	1	1	1	1	1	1	1	1	1	1	1	1	1	1	1	1	1	1	1	1	1	1	1	1	1	1	1	1	1	1	1	1	1	1
iaaA	iaaA	Putative asparaginase;beta-aspartyl-peptidase	568	569	1.00176	1	3332	414	942	940.313	1	1	1	1	1	1	1	1	1	1	1	1	1	1	1	1	1	1	1	1	1	1	1	1	1	1	1	1	1	1	1	1	1	1	1	1	1	1	1
glk	glk	hypothetical protein;glucokinase	568	569	1.00176	1	3330	333	966	964.334	1	1	1	1	1	1	1	1	1	1	1	1	1	1	1	1	1	1	1	1	1	1	1	1	1	1	1	1	1	1	1	1	1	1	1	1	1	1	1
hilD	hilD	hypothetical protein;AraC family transcriptional regulator	568	568	1	1	3329	291	930	920.583	1	1	1	1	1	1	1	1	1	1	1	1	1	1	1	1	1	1	1	1	1	1	1	1	1	1	1	1	1	1	1	1	1	1	1	1	1	1	1
group_1202	dnaK	Molecular chaperone HscC;Molecular chaperone DnaK (HSP70)	568	569	1.00176	1	3328	780	1680	1677.03	1	1	1	1	1	1	1	1	1	1	1	1	1	1	1	1	1	1	1	1	1	1	1	1	1	1	1	1	1	1	1	1	1	1	1	1	1	1	1
yjiN	yjiN	DUF445 domain-containing protein	568	568	1	1	3327	1221	1272	1271.91	1	1	1	1	1	1	1	1	1	1	1	1	1	1	1	1	1	1	1	1	1	1	1	1	1	1	1	1	1	1	1	1	1	1	1	1	1	1	1
nupC	nupC	Nucleoside permease NupC;nucleoside permease NupC	568	569	1.00176	1	3326	492	1245	1199.47	1	1	1	1	1	1	1	1	1	1	1	1	1	1	1	1	1	1	1	1	1	1	1	1	1	1	1	1	1	1	1	1	1	1	1	1	1	1	1
group_1201		Protein;DUF2502 domain-containing protein	568	568	1	1	3325	198	327	326.773	1	1	1	1	1	1	1	1	1	1	1	1	1	1	1	1	1	1	1	1	1	1	1	1	1	1	1	1	1	1	1	1	1	1	1	1	1	1	1
group_1200		cytoplasmic protein;Cytoplasmic protein	568	568	1	1	3324	558	606	605.915	1	1	1	1	1	1	1	1	1	1	1	1	1	1	1	1	1	1	1	1	1	1	1	1	1	1	1	1	1	1	1	1	1	1	1	1	1	1	1
group_1199		hypothetical protein;Cytoplasmic protein	568	568	1	1	3323	399	531	530.768	1	1	1	1	1	1	1	1	1	1	1	1	1	1	1	1	1	1	1	1	1	1	1	1	1	1	1	1	1	1	1	1	1	1	1	1	1	1	1
deaD	deaD	DEAD/DEAH family ATP-dependent RNA helicase;ATP-dependent RNA helicase DeaD	568	568	1	1	3322	1812	1890	1889.86	1	1	1	1	1	1	1	1	1	1	1	1	1	1	1	1	1	1	1	1	1	1	1	1	1	1	1	1	1	1	1	1	1	1	1	1	1	1	1
kdgT2	kdgT2	2-keto-3-deoxygluconate permease;hypothetical protein;2-keto-3-deoxygluconate permease 2	568	569	1.00176	1	3321	402	954	952.281	1	1	1	1	1	1	1	1	1	1	1	1	1	1	1	1	1	1	1	1	1	1	1	1	1	1	1	1	1	1	1	1	1	1	1	1	1	1	1
mod	mod	site-specific DNA-methyltransferase;Type III restriction-modification system StyLTI enzyme mod;Type III restriction-modification enzyme StyLTI Mod subunit	568	570	1.00352	1	3320	354	1959	1948.96	1	1	1	1	1	1	1	1	1	1	1	1	1	1	1	1	1	1	1	1	1	1	1	1	1	1	1	1	1	1	1	1	1	1	1	1	1	1	1
group_1198		3-phenylpropionic acid transporter;3-phenylpropionate MFS transporter;Putative 3-phenylpropionic acid transporter	568	572	1.00704	1	3319	390	1140	1132	1	1	1	1	1	1	1	1	1	1	1	1	1	1	1	1	1	1	1	1	1	1	1	1	1	1	1	1	1	1	1	1	1	1	1	1	1	1	1
group_1197		XRE family transcriptional regulator;Regulatory protein	568	568	1	1	3318	1125	1182	1181.9	1	1	1	1	1	1	1	1	1	1	1	1	1	1	1	1	1	1	1	1	1	1	1	1	1	1	1	1	1	1	1	1	1	1	1	1	1	1	1
kdgT1	kdgT1	2-keto-3-deoxygluconate permease;2-keto-3-deoxygluconate permease 1	568	568	1	1	3317	840	954	953.799	1	1	1	1	1	1	1	1	1	1	1	1	1	1	1	1	1	1	1	1	1	1	1	1	1	1	1	1	1	1	1	1	1	1	1	1	1	1	1
group_1196	pgtB	two-component system sensor histidine kinase PgtB;Histidine kinase	568	568	1	1	3316	753	2007	770.662	1	1	1	1	1	1	1	1	1	1	1	1	1	1	1	1	1	1	1	1	1	1	1	1	1	1	1	1	1	1	1	1	1	1	1	1	1	1	1
pgtP	pgtP	Phosphoglycerate transporter;phosphoglycerate transporter PgtP	568	568	1	1	3315	1014	1392	1391.33	1	1	1	1	1	1	1	1	1	1	1	1	1	1	1	1	1	1	1	1	1	1	1	1	1	1	1	1	1	1	1	1	1	1	1	1	1	1	1
yfgM	yfgM	Putative negative regulator of RcsB-dependent stress response UPF0070 family	568	568	1	1	3314	579	621	620.926	1	1	1	1	1	1	1	1	1	1	1	1	1	1	1	1	1	1	1	1	1	1	1	1	1	1	1	1	1	1	1	1	1	1	1	1	1	1	1
group_1195	dam	adenine-specific DNA-methyltransferase	568	568	1	1	3313	816	837	836.963	1	1	1	1	1	1	1	1	1	1	1	1	1	1	1	1	1	1	1	1	1	1	1	1	1	1	1	1	1	1	1	1	1	1	1	1	1	1	1
serC	serC	3-phosphoserine/phosphohydroxythreonine transaminase	568	568	1	1	3312	1053	1089	1088.94	1	1	1	1	1	1	1	1	1	1	1	1	1	1	1	1	1	1	1	1	1	1	1	1	1	1	1	1	1	1	1	1	1	1	1	1	1	1	1
group_1194	htpX	metalloprotease;Zn-dependent protease with chaperone function	568	568	1	1	3311	663	762	761.826	1	1	1	1	1	1	1	1	1	1	1	1	1	1	1	1	1	1	1	1	1	1	1	1	1	1	1	1	1	1	1	1	1	1	1	1	1	1	1
gabP	gabP	GABA permease	568	568	1	1	3310	1224	1401	1400.69	1	1	1	1	1	1	1	1	1	1	1	1	1	1	1	1	1	1	1	1	1	1	1	1	1	1	1	1	1	1	1	1	1	1	1	1	1	1	1
yibQ	yibQ	Uncharacterized conserved protein YibQ putative polysaccharide deacetylase 2 family;putative conserved protein YibQ putative polysaccharide deacetylase 2 family	568	568	1	1	3309	939	963	962.958	1	1	1	1	1	1	1	1	1	1	1	1	1	1	1	1	1	1	1	1	1	1	1	1	1	1	1	1	1	1	1	1	1	1	1	1	1	1	1
allB	allB	Allantoinase;allantoinase AllB;Dihydroorotase;allantoinase	568	586	1.03169	1	3308	267	1362	1320.16	1	1	1	1	1	1	1	1	1	1	1	1	1	1	1	1	1	1	1	1	1	1	1	1	1	1	1	1	1	1	1	1	1	1	1	1	1	1	1
group_1193		DUF4385 domain-containing protein;Cytoplasmic protein	568	568	1	1	3307	291	456	455.562	1	1	1	1	1	1	1	1	1	1	1	1	1	1	1	1	1	1	1	1	1	1	1	1	1	1	1	1	1	1	1	1	1	1	1	1	1	1	1
nrfG	nrfG	hypothetical protein;heme lyase NrfEFG subunit NrfG	568	568	1	1	3306	375	621	620.567	1	1	1	1	1	1	1	1	1	1	1	1	1	1	1	1	1	1	1	1	1	1	1	1	1	1	1	1	1	1	1	1	1	1	1	1	1	1	1
group_1192	tPR	Sel1 repeat family protein;TPR repeat	568	568	1	1	3305	255	690	689.234	1	1	1	1	1	1	1	1	1	1	1	1	1	1	1	1	1	1	1	1	1	1	1	1	1	1	1	1	1	1	1	1	1	1	1	1	1	1	1
sgcQ	sgcQ	Nucleoside tri phosphatase;BtpA family protein SgcQ	568	568	1	1	3304	540	807	806.53	1	1	1	1	1	1	1	1	1	1	1	1	1	1	1	1	1	1	1	1	1	1	1	1	1	1	1	1	1	1	1	1	1	1	1	1	1	1	1
group_1191	sdaC	putative serine transporter;Amino acid permease;Serine transporter;Transporter;septum formation protein	568	574	1.01056	1	3303	120	1338	1323.67	1	1	1	1	1	1	1	1	1	1	1	1	1	1	1	1	1	1	1	1	1	1	1	1	1	1	1	1	1	1	1	1	1	1	1	1	1	1	1
ftsW	ftsW	cell division protein FtsW	568	568	1	1	3302	1155	1245	1244.84	1	1	1	1	1	1	1	1	1	1	1	1	1	1	1	1	1	1	1	1	1	1	1	1	1	1	1	1	1	1	1	1	1	1	1	1	1	1	1
phoR	phoR	phosphate regulon sensor histidine kinase PhoR	568	568	1	1	3301	1302	1314	1302.02	1	1	1	1	1	1	1	1	1	1	1	1	1	1	1	1	1	1	1	1	1	1	1	1	1	1	1	1	1	1	1	1	1	1	1	1	1	1	1
group_1190	dinF	Putative cytoplasmic protein;MATE family efflux transporter DinF	568	568	1	1	3300	129	129	129	1	1	1	1	1	1	1	1	1	1	1	1	1	1	1	1	1	1	1	1	1	1	1	1	1	1	1	1	1	1	1	1	1	1	1	1	1	1	1
group_1189	gntR	GntR family transcriptional regulator;DNA-binding transcriptional regulator GntR family	568	568	1	1	3299	696	885	871.357	1	1	1	1	1	1	1	1	1	1	1	1	1	1	1	1	1	1	1	1	1	1	1	1	1	1	1	1	1	1	1	1	1	1	1	1	1	1	1
group_1188	gloA	Virulence protein STM3117	568	568	1	1	3297	381	435	381.095	1	1	1	1	1	1	1	1	1	1	1	1	1	1	1	1	1	1	1	1	1	1	1	1	1	1	1	1	1	1	1	1	1	1	1	1	1	1	1
ssuE~~~chrR	ssuE;chrR	Quinone reductase	568	568	1	1	3296	567	585	569.472	1	1	1	1	1	1	1	1	1	1	1	1	1	1	1	1	1	1	1	1	1	1	1	1	1	1	1	1	1	1	1	1	1	1	1	1	1	1	1
qseG	qseG	two-component system QseEF-associated lipoprotein QseG	568	568	1	1	3295	687	765	763.764	1	1	1	1	1	1	1	1	1	1	1	1	1	1	1	1	1	1	1	1	1	1	1	1	1	1	1	1	1	1	1	1	1	1	1	1	1	1	1
group_1187		hypothetical protein;Putative inner membrane protein	568	568	1	1	3293	321	480	474.229	1	1	1	1	1	1	1	1	1	1	1	1	1	1	1	1	1	1	1	1	1	1	1	1	1	1	1	1	1	1	1	1	1	1	1	1	1	1	1
tssJ~~~sTM0280	tssJ;sTM0280	type VI secretion system lipoprotein TssJ;type VI secretion system-associated lipoprotein	568	568	1	1	3291	408	537	536.614	1	1	1	1	1	1	1	1	1	1	1	1	1	1	1	1	1	1	1	1	1	1	1	1	1	1	1	1	1	1	1	1	1	1	1	1	1	1	1
group_1185	menH	hydrolase;2-succinyl-6-hydroxy-24-cyclohexadiene-1-carboxylate synthase MenH and related esterases alpha/beta hydrolase fold	568	568	1	1	3290	558	894	893.408	1	1	1	1	1	1	1	1	1	1	1	1	1	1	1	1	1	1	1	1	1	1	1	1	1	1	1	1	1	1	1	1	1	1	1	1	1	1	1
group_1184	lysR	LysR family transcriptional regulator;DNA-binding transcriptional regulator LysR family	568	568	1	1	3288	723	915	914.662	1	1	1	1	1	1	1	1	1	1	1	1	1	1	1	1	1	1	1	1	1	1	1	1	1	1	1	1	1	1	1	1	1	1	1	1	1	1	1
group_1183	fldA	Uncharacterized protein YqcA;flavodoxin	568	568	1	1	3287	342	450	449.81	1	1	1	1	1	1	1	1	1	1	1	1	1	1	1	1	1	1	1	1	1	1	1	1	1	1	1	1	1	1	1	1	1	1	1	1	1	1	1
rpsP	rpsP	30S ribosomal protein S16	568	568	1	1	3286	249	267	249.032	1	1	1	1	1	1	1	1	1	1	1	1	1	1	1	1	1	1	1	1	1	1	1	1	1	1	1	1	1	1	1	1	1	1	1	1	1	1	1
ypjD	ypjD	Inner membrane protein YpjD;ABC-type putative transport system permease component	568	568	1	1	3285	792	885	792.164	1	1	1	1	1	1	1	1	1	1	1	1	1	1	1	1	1	1	1	1	1	1	1	1	1	1	1	1	1	1	1	1	1	1	1	1	1	1	1
hprR	hprR	response regulator transcription factor HprR	568	568	1	1	3284	606	738	737.768	1	1	1	1	1	1	1	1	1	1	1	1	1	1	1	1	1	1	1	1	1	1	1	1	1	1	1	1	1	1	1	1	1	1	1	1	1	1	1
group_1182	sdaC	Serine transporter;Serine transporter SdaC;HAAAP family serine/threonine permease SdaC	568	570	1.00352	1	3283	381	1290	1285.47	1	1	1	1	1	1	1	1	1	1	1	1	1	1	1	1	1	1	1	1	1	1	1	1	1	1	1	1	1	1	1	1	1	1	1	1	1	1	1
zapG	zapG	Cytochrome d ubiquinol oxidase subunit III;Z-ring associated protein ZapG	568	568	1	1	3281	399	558	399.28	1	1	1	1	1	1	1	1	1	1	1	1	1	1	1	1	1	1	1	1	1	1	1	1	1	1	1	1	1	1	1	1	1	1	1	1	1	1	1
group_1180	tPR	Putative periplasmic protein;Beta-lactamase;Periplasmic protein;Sel1 repeat family protein;hypothetical protein;SEL1-like repeat protein;TPR repeat	568	572	1.00704	1	3280	219	1512	1496.12	1	1	1	1	1	1	1	1	1	1	1	1	1	1	1	1	1	1	1	1	1	1	1	1	1	1	1	1	1	1	1	1	1	1	1	1	1	1	1
cmtB	cmtB	PTS mannitol transporter subunit IIA	568	568	1	1	3279	360	444	443.35	1	1	1	1	1	1	1	1	1	1	1	1	1	1	1	1	1	1	1	1	1	1	1	1	1	1	1	1	1	1	1	1	1	1	1	1	1	1	1
safC	safC	Pilin outer membrane usher protein SafC	568	568	1	1	3278	975	1041	1040.77	1	1	1	1	1	1	1	1	1	1	1	1	1	1	1	1	1	1	1	1	1	1	1	1	1	1	1	1	1	1	1	1	1	1	1	1	1	1	1
safD	safD	pilin structural protein SafD;Pilin structural protein SafD	568	568	1	1	3277	318	471	470.731	1	1	1	1	1	1	1	1	1	1	1	1	1	1	1	1	1	1	1	1	1	1	1	1	1	1	1	1	1	1	1	1	1	1	1	1	1	1	1
hofC	hofC	Type IV pilin biogenesis protein;protein transport protein HofC	568	568	1	1	3276	975	1206	1205.38	1	1	1	1	1	1	1	1	1	1	1	1	1	1	1	1	1	1	1	1	1	1	1	1	1	1	1	1	1	1	1	1	1	1	1	1	1	1	1
ppiB	ppiB	Peptidyl-prolyl cis-trans isomerase;peptidylprolyl isomerase B	568	568	1	1	3275	405	495	494.842	1	1	1	1	1	1	1	1	1	1	1	1	1	1	1	1	1	1	1	1	1	1	1	1	1	1	1	1	1	1	1	1	1	1	1	1	1	1	1
siiC	siiC	type-I secretion protein;SPI-4 type I secretion system protein SiiC	568	568	1	1	3274	1020	1332	1331.44	1	1	1	1	1	1	1	1	1	1	1	1	1	1	1	1	1	1	1	1	1	1	1	1	1	1	1	1	1	1	1	1	1	1	1	1	1	1	1
pduQ	pduQ	Iron-containing alcohol dehydrogenase;1-propanol dehydrogenase PduQ	568	568	1	1	3273	1113	2391	1115.25	1	1	1	1	1	1	1	1	1	1	1	1	1	1	1	1	1	1	1	1	1	1	1	1	1	1	1	1	1	1	1	1	1	1	1	1	1	1	1
manB~~~cpsG	manB;cpsG	Phosphomannomutase;colanic acid biosynthesis phosphomannomutase CpsG	568	569	1.00176	1	3272	264	1371	1368.54	1	1	1	1	1	1	1	1	1	1	1	1	1	1	1	1	1	1	1	1	1	1	1	1	1	1	1	1	1	1	1	1	1	1	1	1	1	1	1
group_1179	torD	Twin-arginine leader-binding protein DmsD;Cytoplasmic chaperone TorD involved in molybdoenzyme TorA maturation	568	568	1	1	3271	453	594	593.752	1	1	1	1	1	1	1	1	1	1	1	1	1	1	1	1	1	1	1	1	1	1	1	1	1	1	1	1	1	1	1	1	1	1	1	1	1	1	1
yjiK	yjiK	Uncharacterized protein YjiK;putative Ca-binding beta-propeller protein YjiK	568	568	1	1	3270	840	861	860.963	1	1	1	1	1	1	1	1	1	1	1	1	1	1	1	1	1	1	1	1	1	1	1	1	1	1	1	1	1	1	1	1	1	1	1	1	1	1	1
group_1178		DKNYY family;Exported protein	568	568	1	1	3269	918	975	974.9	1	1	1	1	1	1	1	1	1	1	1	1	1	1	1	1	1	1	1	1	1	1	1	1	1	1	1	1	1	1	1	1	1	1	1	1	1	1	1
galF	galF	GalU regulator GalF	568	568	1	1	3268	756	894	893.757	1	1	1	1	1	1	1	1	1	1	1	1	1	1	1	1	1	1	1	1	1	1	1	1	1	1	1	1	1	1	1	1	1	1	1	1	1	1	1
araJ~~~mdtD	araJ;mdtD	Transporter protein;putative arabinose efflux permease AraJ MFS family;MFS domain-containing protein;Putative membrane protein;Putative multidrug resistance protein MdtD	568	576	1.01408	1	3267	201	1413	1391.84	1	1	1	1	1	1	1	1	1	1	1	1	1	1	1	1	1	1	1	1	1	1	1	1	1	1	1	1	1	1	1	1	1	1	1	1	1	1	1
eutJ	eutJ	ethanolamine utilization protein EutJ	568	568	1	1	3266	708	840	839.535	1	1	1	1	1	1	1	1	1	1	1	1	1	1	1	1	1	1	1	1	1	1	1	1	1	1	1	1	1	1	1	1	1	1	1	1	1	1	1
group_1177		hypothetical protein;Myosin motor domain-containing protein	568	568	1	1	3265	408	534	533.778	1	1	1	1	1	1	1	1	1	1	1	1	1	1	1	1	1	1	1	1	1	1	1	1	1	1	1	1	1	1	1	1	1	1	1	1	1	1	1
tar	tar	hypothetical protein;methyl-accepting chemotaxis protein;Methyl-accepting chemotaxis protein (MCP)	568	568	1	1	3264	309	1059	1057.25	1	1	1	1	1	1	1	1	1	1	1	1	1	1	1	1	1	1	1	1	1	1	1	1	1	1	1	1	1	1	1	1	1	1	1	1	1	1	1
treR	treR	trehalose operon repressor TreR	568	569	1.00176	1	3263	297	948	946.255	1	1	1	1	1	1	1	1	1	1	1	1	1	1	1	1	1	1	1	1	1	1	1	1	1	1	1	1	1	1	1	1	1	1	1	1	1	1	1
fucU	fucU	L-fucose mutarotase	568	568	1	1	3261	423	438	423.026	1	1	1	1	1	1	1	1	1	1	1	1	1	1	1	1	1	1	1	1	1	1	1	1	1	1	1	1	1	1	1	1	1	1	1	1	1	1	1
group_1175	pflA	pyruvate formate lyase 1-activating protein;Pyruvate formate-lyase activating enzyme	568	568	1	1	3260	573	798	797.34	1	1	1	1	1	1	1	1	1	1	1	1	1	1	1	1	1	1	1	1	1	1	1	1	1	1	1	1	1	1	1	1	1	1	1	1	1	1	1
ldtA	ldtA	LD-transpeptidase	568	568	1	1	3258	894	978	930.021	1	1	1	1	1	1	1	1	1	1	1	1	1	1	1	1	1	1	1	1	1	1	1	1	1	1	1	1	1	1	1	1	1	1	1	1	1	1	1
group_1173		Type I secretion protein ATP-binding protein	568	568	1	1	3256	999	1038	1037.93	1	1	1	1	1	1	1	1	1	1	1	1	1	1	1	1	1	1	1	1	1	1	1	1	1	1	1	1	1	1	1	1	1	1	1	1	1	1	1
rnaY	rnaY	phosphohydrolase	568	568	1	1	3255	549	696	695.482	1	1	1	1	1	1	1	1	1	1	1	1	1	1	1	1	1	1	1	1	1	1	1	1	1	1	1	1	1	1	1	1	1	1	1	1	1	1	1
group_1172		Putative tRNA ligase;Uncharacterized protein ybeR;DUF1266 domain-containing protein	568	570	1.00352	1	3254	180	696	693.605	1	1	1	1	1	1	1	1	1	1	1	1	1	1	1	1	1	1	1	1	1	1	1	1	1	1	1	1	1	1	1	1	1	1	1	1	1	1	1
ltaE	ltaE	Low specificity L-threonine aldolase;low-specificity L-threonine aldolase	568	569	1.00176	1	3253	321	1002	1000.32	1	1	1	1	1	1	1	1	1	1	1	1	1	1	1	1	1	1	1	1	1	1	1	1	1	1	1	1	1	1	1	1	1	1	1	1	1	1	1
dpaL	dpaL	hypothetical protein;diaminopropionate ammonia-lyase	568	568	1	1	3252	336	1230	838.326	1	1	1	1	1	1	1	1	1	1	1	1	1	1	1	1	1	1	1	1	1	1	1	1	1	1	1	1	1	1	1	1	1	1	1	1	1	1	1
group_1171		hypothetical protein;Glucose-6-phosphate dehydrogenase	568	568	1	1	3251	192	327	326.287	1	1	1	1	1	1	1	1	1	1	1	1	1	1	1	1	1	1	1	1	1	1	1	1	1	1	1	1	1	1	1	1	1	1	1	1	1	1	1
group_1170		hypothetical protein;Inner membrane protein	568	568	1	1	3250	285	330	285.08	1	1	1	1	1	1	1	1	1	1	1	1	1	1	1	1	1	1	1	1	1	1	1	1	1	1	1	1	1	1	1	1	1	1	1	1	1	1	1
group_1169		Outer membrane protein;Transporter	568	568	1	1	3249	357	894	893.055	1	1	1	1	1	1	1	1	1	1	1	1	1	1	1	1	1	1	1	1	1	1	1	1	1	1	1	1	1	1	1	1	1	1	1	1	1	1	1
yqiK	yqiK	flotillin;putative membrane protein YqiK contains Band7/PHB/SPFH domain	568	568	1	1	3248	1680	1764	1730.87	1	1	1	1	1	1	1	1	1	1	1	1	1	1	1	1	1	1	1	1	1	1	1	1	1	1	1	1	1	1	1	1	1	1	1	1	1	1	1
group_1168		hypothetical protein;ABC transporter permease	568	568	1	1	3247	102	153	102.09	1	1	1	1	1	1	1	1	1	1	1	1	1	1	1	1	1	1	1	1	1	1	1	1	1	1	1	1	1	1	1	1	1	1	1	1	1	1	1
fxsA	fxsA	membrane protein FxsA	568	568	1	1	3246	477	516	515.863	1	1	1	1	1	1	1	1	1	1	1	1	1	1	1	1	1	1	1	1	1	1	1	1	1	1	1	1	1	1	1	1	1	1	1	1	1	1	1
iolB	iolB	hypothetical protein;5-deoxy-glucuronate isomerase	568	569	1.00176	1	3245	225	810	808.582	1	1	1	1	1	1	1	1	1	1	1	1	1	1	1	1	1	1	1	1	1	1	1	1	1	1	1	1	1	1	1	1	1	1	1	1	1	1	1
cysD	cysD	sulfate adenylyltransferase subunit CysD	568	568	1	1	3244	858	909	908.91	1	1	1	1	1	1	1	1	1	1	1	1	1	1	1	1	1	1	1	1	1	1	1	1	1	1	1	1	1	1	1	1	1	1	1	1	1	1	1
group_1167	ydiV	Anti-FlhC(2)FlhD(4) factor YdiV	568	568	1	1	3243	297	312	298.585	1	1	1	1	1	1	1	1	1	1	1	1	1	1	1	1	1	1	1	1	1	1	1	1	1	1	1	1	1	1	1	1	1	1	1	1	1	1	1
group_1166	rpiR	Putative hex-regulon repressor (RpiR-family transcriptional regulator);DNA-binding transcriptional regulator HexR;DNA-binding transcriptional regulator MurR/RpiR family contains HTH and SIS domains	568	569	1.00176	1	3242	432	870	868.476	1	1	1	1	1	1	1	1	1	1	1	1	1	1	1	1	1	1	1	1	1	1	1	1	1	1	1	1	1	1	1	1	1	1	1	1	1	1	1
lpxM	lpxM	lauroyl-Kdo(2)-lipid IV(A) myristoyltransferase	568	568	1	1	3241	876	972	971.831	1	1	1	1	1	1	1	1	1	1	1	1	1	1	1	1	1	1	1	1	1	1	1	1	1	1	1	1	1	1	1	1	1	1	1	1	1	1	1
yIH1	yIH1	IMPACT family protein	568	568	1	1	3240	540	615	614.868	1	1	1	1	1	1	1	1	1	1	1	1	1	1	1	1	1	1	1	1	1	1	1	1	1	1	1	1	1	1	1	1	1	1	1	1	1	1	1
prfH	prfH	peptide chain release factor H	568	568	1	1	3239	489	615	614.778	1	1	1	1	1	1	1	1	1	1	1	1	1	1	1	1	1	1	1	1	1	1	1	1	1	1	1	1	1	1	1	1	1	1	1	1	1	1	1
citG	citG	triphosphoribosyl-dephospho-CoA synthase CitG	568	568	1	1	3238	810	897	896.847	1	1	1	1	1	1	1	1	1	1	1	1	1	1	1	1	1	1	1	1	1	1	1	1	1	1	1	1	1	1	1	1	1	1	1	1	1	1	1
yhdE	yhdE	dTTP/UTP pyrophosphatase	568	568	1	1	3235	594	771	594.312	1	1	1	1	1	1	1	1	1	1	1	1	1	1	1	1	1	1	1	1	1	1	1	1	1	1	1	1	1	1	1	1	1	1	1	1	1	1	1
rsmD	rsmD	16S rRNA (guanine(966)-N(2))-methyltransferase	568	568	1	1	3234	447	597	596.736	1	1	1	1	1	1	1	1	1	1	1	1	1	1	1	1	1	1	1	1	1	1	1	1	1	1	1	1	1	1	1	1	1	1	1	1	1	1	1
group_1163	ygiB	UPF0441 protein W5S_0336;DUF1190 domain-containing protein	568	568	1	1	3233	357	672	667.352	1	1	1	1	1	1	1	1	1	1	1	1	1	1	1	1	1	1	1	1	1	1	1	1	1	1	1	1	1	1	1	1	1	1	1	1	1	1	1
wcaK	wcaK	colanic acid biosynthesis pyruvyl transferase WcaK	568	568	1	1	3232	1176	1281	1280.82	1	1	1	1	1	1	1	1	1	1	1	1	1	1	1	1	1	1	1	1	1	1	1	1	1	1	1	1	1	1	1	1	1	1	1	1	1	1	1
cyoA	cyoA	Cytochrome o ubiquinol oxidase subunit II;ubiquinol oxidase subunit II;cytochrome o ubiquinol oxidase subunit II	568	570	1.00352	1	3231	219	957	953.316	1	1	1	1	1	1	1	1	1	1	1	1	1	1	1	1	1	1	1	1	1	1	1	1	1	1	1	1	1	1	1	1	1	1	1	1	1	1	1
yedD	yedD	lipoprotein	568	568	1	1	3230	402	414	413.958	1	1	1	1	1	1	1	1	1	1	1	1	1	1	1	1	1	1	1	1	1	1	1	1	1	1	1	1	1	1	1	1	1	1	1	1	1	1	1
fba	fba	class II aldolase	568	568	1	1	3229	813	861	860.915	1	1	1	1	1	1	1	1	1	1	1	1	1	1	1	1	1	1	1	1	1	1	1	1	1	1	1	1	1	1	1	1	1	1	1	1	1	1	1
group_1162	sgaB	PTS sugar transporter IIB;Phosphotransferase system galactitol-specific IIB component	568	568	1	1	3228	264	321	320.599	1	1	1	1	1	1	1	1	1	1	1	1	1	1	1	1	1	1	1	1	1	1	1	1	1	1	1	1	1	1	1	1	1	1	1	1	1	1	1
yeaH	yeaH	UPF0229 protein KPK_3252;DUF444 domain-containing protein;Putative cytoplasmic protein;UPF0229 protein YeaH	568	570	1.00352	1	3227	375	1284	1277.98	1	1	1	1	1	1	1	1	1	1	1	1	1	1	1	1	1	1	1	1	1	1	1	1	1	1	1	1	1	1	1	1	1	1	1	1	1	1	1
yebB	yebB	YebB family permuted papain-like enzyme	568	568	1	1	3226	597	627	597.159	1	1	1	1	1	1	1	1	1	1	1	1	1	1	1	1	1	1	1	1	1	1	1	1	1	1	1	1	1	1	1	1	1	1	1	1	1	1	1
uspB	uspB	universal stress protein UspB	568	568	1	1	3224	231	336	335.625	1	1	1	1	1	1	1	1	1	1	1	1	1	1	1	1	1	1	1	1	1	1	1	1	1	1	1	1	1	1	1	1	1	1	1	1	1	1	1
group_1160		DUF3156 domain-containing protein;Cytoplasmic protein	568	568	1	1	3223	531	558	557.952	1	1	1	1	1	1	1	1	1	1	1	1	1	1	1	1	1	1	1	1	1	1	1	1	1	1	1	1	1	1	1	1	1	1	1	1	1	1	1
rimP	rimP	ribosome maturation factor RimP	568	568	1	1	3222	423	453	452.63	1	1	1	1	1	1	1	1	1	1	1	1	1	1	1	1	1	1	1	1	1	1	1	1	1	1	1	1	1	1	1	1	1	1	1	1	1	1	1
group_1159		Uncharacterized protein SciJ;Cytoplasmic protein	568	568	1	1	3221	351	447	388.69	1	1	1	1	1	1	1	1	1	1	1	1	1	1	1	1	1	1	1	1	1	1	1	1	1	1	1	1	1	1	1	1	1	1	1	1	1	1	1
manA	manA	mannose-6-phosphate isomerase;hypothetical protein	568	569	1.00176	1	3220	111	1176	1173.57	1	1	1	1	1	1	1	1	1	1	1	1	1	1	1	1	1	1	1	1	1	1	1	1	1	1	1	1	1	1	1	1	1	1	1	1	1	1	1
malI	malI	Maltose regulon regulatory protein;Maltose regulon regulatory protein malI	568	568	1	1	3219	426	588	587.715	1	1	1	1	1	1	1	1	1	1	1	1	1	1	1	1	1	1	1	1	1	1	1	1	1	1	1	1	1	1	1	1	1	1	1	1	1	1	1
group_1158		hypothetical protein;Nucleoside-specific channel-forming protein Tsx	568	568	1	1	3218	486	765	760.136	1	1	1	1	1	1	1	1	1	1	1	1	1	1	1	1	1	1	1	1	1	1	1	1	1	1	1	1	1	1	1	1	1	1	1	1	1	1	1
group_1157		hypothetical protein;Aminoglycoside phosphotransferase	568	568	1	1	3217	135	135	135	1	1	1	1	1	1	1	1	1	1	1	1	1	1	1	1	1	1	1	1	1	1	1	1	1	1	1	1	1	1	1	1	1	1	1	1	1	1	1
degP	degP	serine endoprotease DegP	568	568	1	1	3215	1428	1482	1428.1	1	1	1	1	1	1	1	1	1	1	1	1	1	1	1	1	1	1	1	1	1	1	1	1	1	1	1	1	1	1	1	1	1	1	1	1	1	1	1
rocR	rocR	sigma-54-dependent Fis family transcriptional regulator;RocR-type transcriptional regulator contains PAS AAA-type ATPase and DNA-binding Fis domains	568	568	1	1	3214	1353	1428	1427.87	1	1	1	1	1	1	1	1	1	1	1	1	1	1	1	1	1	1	1	1	1	1	1	1	1	1	1	1	1	1	1	1	1	1	1	1	1	1	1
citX	citX	Apo-citrate lyase phosphoribosyl-dephospho-CoA transferase;Phosphoribosyl-dephospho-CoA transferase (holo-ACP synthetase)	568	568	1	1	3213	402	552	551.736	1	1	1	1	1	1	1	1	1	1	1	1	1	1	1	1	1	1	1	1	1	1	1	1	1	1	1	1	1	1	1	1	1	1	1	1	1	1	1
malE	malE	maltose/maltodextrin ABC transporter substrate-binding protein MalE	568	568	1	1	3210	1011	1191	1190.68	1	1	1	1	1	1	1	1	1	1	1	1	1	1	1	1	1	1	1	1	1	1	1	1	1	1	1	1	1	1	1	1	1	1	1	1	1	1	1
appB	appB	cytochrome d ubiquinol oxidase subunit II	568	568	1	1	3209	1071	1137	1136.88	1	1	1	1	1	1	1	1	1	1	1	1	1	1	1	1	1	1	1	1	1	1	1	1	1	1	1	1	1	1	1	1	1	1	1	1	1	1	1
group_1155	pspE	Rhodanese-related sulfurtransferase	568	568	1	1	3208	324	432	431.81	1	1	1	1	1	1	1	1	1	1	1	1	1	1	1	1	1	1	1	1	1	1	1	1	1	1	1	1	1	1	1	1	1	1	1	1	1	1	1
group_1153	caiD	crotonobetainyl-CoA hydratase	568	568	1	1	3206	786	843	786.1	1	1	1	1	1	1	1	1	1	1	1	1	1	1	1	1	1	1	1	1	1	1	1	1	1	1	1	1	1	1	1	1	1	1	1	1	1	1	1
luxS	luxS	S-ribosylhomocysteine lyase	568	568	1	1	3205	516	615	516.174	1	1	1	1	1	1	1	1	1	1	1	1	1	1	1	1	1	1	1	1	1	1	1	1	1	1	1	1	1	1	1	1	1	1	1	1	1	1	1
ygaA	ygaA	SNARE associated Golgi protein;putative membrane protein YqaA VTT domain	568	568	1	1	3204	414	426	425.979	1	1	1	1	1	1	1	1	1	1	1	1	1	1	1	1	1	1	1	1	1	1	1	1	1	1	1	1	1	1	1	1	1	1	1	1	1	1	1
group_1152	rimI	N-acetyltransferase	568	568	1	1	3203	420	441	440.963	1	1	1	1	1	1	1	1	1	1	1	1	1	1	1	1	1	1	1	1	1	1	1	1	1	1	1	1	1	1	1	1	1	1	1	1	1	1	1
group_1151	rbsK	sugar kinase;Sugar or nucleoside kinase ribokinase family	568	568	1	1	3202	924	948	947.958	1	1	1	1	1	1	1	1	1	1	1	1	1	1	1	1	1	1	1	1	1	1	1	1	1	1	1	1	1	1	1	1	1	1	1	1	1	1	1
ompX	ompX	outer membrane protein OmpX;Outer membrane protein X	568	568	1	1	3201	501	516	515.947	1	1	1	1	1	1	1	1	1	1	1	1	1	1	1	1	1	1	1	1	1	1	1	1	1	1	1	1	1	1	1	1	1	1	1	1	1	1	1
group_1150	dppB	ABC-type dipeptide/oligopeptide/nickel transport system permease component	568	568	1	1	3200	897	975	974.07	1	1	1	1	1	1	1	1	1	1	1	1	1	1	1	1	1	1	1	1	1	1	1	1	1	1	1	1	1	1	1	1	1	1	1	1	1	1	1
group_1149		hypothetical protein;Cytoplasmic protein	568	568	1	1	3199	390	765	727.87	1	1	1	1	1	1	1	1	1	1	1	1	1	1	1	1	1	1	1	1	1	1	1	1	1	1	1	1	1	1	1	1	1	1	1	1	1	1	1
aceA	aceA	hypothetical protein;isocitrate lyase	568	569	1.00176	1	3198	162	1305	1302.7	1	1	1	1	1	1	1	1	1	1	1	1	1	1	1	1	1	1	1	1	1	1	1	1	1	1	1	1	1	1	1	1	1	1	1	1	1	1	1
sicP	sicP	chaparone for SptP;chaperone SicP	568	568	1	1	3197	192	393	193.415	1	1	1	1	1	1	1	1	1	1	1	1	1	1	1	1	1	1	1	1	1	1	1	1	1	1	1	1	1	1	1	1	1	1	1	1	1	1	1
trmN	trmN	tRNA(1)(Val) (adenine(37)-N(6))-methyltransferase TrmN	568	568	1	1	3196	717	738	737.963	1	1	1	1	1	1	1	1	1	1	1	1	1	1	1	1	1	1	1	1	1	1	1	1	1	1	1	1	1	1	1	1	1	1	1	1	1	1	1
pepE	pepE	dipeptidase PepE	568	568	1	1	3195	690	777	690.153	1	1	1	1	1	1	1	1	1	1	1	1	1	1	1	1	1	1	1	1	1	1	1	1	1	1	1	1	1	1	1	1	1	1	1	1	1	1	1
dcuR	dcuR	Response regulatory domain-containing protein;two-component system response regulator DcuR	568	568	1	1	3194	393	720	719.424	1	1	1	1	1	1	1	1	1	1	1	1	1	1	1	1	1	1	1	1	1	1	1	1	1	1	1	1	1	1	1	1	1	1	1	1	1	1	1
pqiA	pqiA	membrane integrity-associated transporter subunit PqiA;Paraquat-inducible protein A	568	571	1.00528	1	3193	483	1254	1247.66	1	1	1	1	1	1	1	1	1	1	1	1	1	1	1	1	1	1	1	1	1	1	1	1	1	1	1	1	1	1	1	1	1	1	1	1	1	1	1
zntA	zntA	Zn(II)/Cd(II)/Pb(II) translocating P-type ATPase ZntA	568	568	1	1	3192	2031	2199	2198.7	1	1	1	1	1	1	1	1	1	1	1	1	1	1	1	1	1	1	1	1	1	1	1	1	1	1	1	1	1	1	1	1	1	1	1	1	1	1	1
arnD	arnD	4-deoxy-4-formamido-L-arabinose-phosphoundecaprenol deformylase;polysaccharide deacetylase family protein	568	569	1.00176	1	3191	351	900	898.344	1	1	1	1	1	1	1	1	1	1	1	1	1	1	1	1	1	1	1	1	1	1	1	1	1	1	1	1	1	1	1	1	1	1	1	1	1	1	1
yjbE	yjbE	hypothetical protein;putative protein YjbE	568	568	1	1	3190	177	246	245.847	1	1	1	1	1	1	1	1	1	1	1	1	1	1	1	1	1	1	1	1	1	1	1	1	1	1	1	1	1	1	1	1	1	1	1	1	1	1	1
ybaK	ybaK	Cys-tRNA(Pro)/Cys-tRNA(Cys) deacylase YbaK	568	568	1	1	3189	384	480	479.831	1	1	1	1	1	1	1	1	1	1	1	1	1	1	1	1	1	1	1	1	1	1	1	1	1	1	1	1	1	1	1	1	1	1	1	1	1	1	1
dpiA	dpiA	response regulator;DNA-binding response regulator DpiB of citrate/malate metabolism	568	568	1	1	3188	687	729	687.074	1	1	1	1	1	1	1	1	1	1	1	1	1	1	1	1	1	1	1	1	1	1	1	1	1	1	1	1	1	1	1	1	1	1	1	1	1	1	1
thiB	thiB	thiamine ABC transporter substrate binding subunit	568	568	1	1	3187	984	1068	984.148	1	1	1	1	1	1	1	1	1	1	1	1	1	1	1	1	1	1	1	1	1	1	1	1	1	1	1	1	1	1	1	1	1	1	1	1	1	1	1
ychH	ychH	stress-induced protein YchH	568	568	1	1	3186	201	279	278.863	1	1	1	1	1	1	1	1	1	1	1	1	1	1	1	1	1	1	1	1	1	1	1	1	1	1	1	1	1	1	1	1	1	1	1	1	1	1	1
group_1148	cheW	chemotaxis protein CheW	568	570	1.00352	1	3185	132	504	502.232	1	1	1	1	1	1	1	1	1	1	1	1	1	1	1	1	1	1	1	1	1	1	1	1	1	1	1	1	1	1	1	1	1	1	1	1	1	1	1
nadK	nadK	NAD(+) kinase	568	568	1	1	3184	765	879	797.915	1	1	1	1	1	1	1	1	1	1	1	1	1	1	1	1	1	1	1	1	1	1	1	1	1	1	1	1	1	1	1	1	1	1	1	1	1	1	1
group_1147		hypothetical protein;Inner membrane protein	568	568	1	1	3183	525	576	525.18	1	1	1	1	1	1	1	1	1	1	1	1	1	1	1	1	1	1	1	1	1	1	1	1	1	1	1	1	1	1	1	1	1	1	1	1	1	1	1
group_1146	menH	2-succinyl-6-hydroxy-24-cyclohexadiene-1-carboxylate synthase	568	568	1	1	3181	759	759	759	1	1	1	1	1	1	1	1	1	1	1	1	1	1	1	1	1	1	1	1	1	1	1	1	1	1	1	1	1	1	1	1	1	1	1	1	1	1	1
fsr	fsr	Fosmidomycin resistance protein	568	568	1	1	3180	1227	1347	1227.21	1	1	1	1	1	1	1	1	1	1	1	1	1	1	1	1	1	1	1	1	1	1	1	1	1	1	1	1	1	1	1	1	1	1	1	1	1	1	1
hutC	hutC	Histidine utilization repressor;histidine utilization repressor	568	568	1	1	3178	537	726	725.667	1	1	1	1	1	1	1	1	1	1	1	1	1	1	1	1	1	1	1	1	1	1	1	1	1	1	1	1	1	1	1	1	1	1	1	1	1	1	1
ybjM	ybjM	Inner membrane protein YbjM;inner membrane protein YbjM	568	568	1	1	3177	300	480	377.905	1	1	1	1	1	1	1	1	1	1	1	1	1	1	1	1	1	1	1	1	1	1	1	1	1	1	1	1	1	1	1	1	1	1	1	1	1	1	1
hslO	hslO	Hsp33 family molecular chaperone HslO	568	568	1	1	3173	837	879	878.926	1	1	1	1	1	1	1	1	1	1	1	1	1	1	1	1	1	1	1	1	1	1	1	1	1	1	1	1	1	1	1	1	1	1	1	1	1	1	1
yedP	yedP	mannosyl-3-phosphoglycerate phosphatase-related protein	568	568	1	1	3172	795	816	815.963	1	1	1	1	1	1	1	1	1	1	1	1	1	1	1	1	1	1	1	1	1	1	1	1	1	1	1	1	1	1	1	1	1	1	1	1	1	1	1
cysJ	cysJ	NADPH-dependent assimilatory sulfite reductase flavoprotein subunit	568	568	1	1	3171	1602	1800	1799.65	1	1	1	1	1	1	1	1	1	1	1	1	1	1	1	1	1	1	1	1	1	1	1	1	1	1	1	1	1	1	1	1	1	1	1	1	1	1	1
group_1145		DUF2756 domain-containing protein	568	568	1	1	3169	363	417	416.81	1	1	1	1	1	1	1	1	1	1	1	1	1	1	1	1	1	1	1	1	1	1	1	1	1	1	1	1	1	1	1	1	1	1	1	1	1	1	1
fabA	fabA	3-hydroxydecanoyl-[acyl-carrier-protein] dehydratase;bifunctional 3-hydroxydecanoyl-ACP dehydratase/trans-2-decenoyl-ACP isomerase	568	568	1	1	3168	519	696	519.312	1	1	1	1	1	1	1	1	1	1	1	1	1	1	1	1	1	1	1	1	1	1	1	1	1	1	1	1	1	1	1	1	1	1	1	1	1	1	1
narK	narK	Nitrate/nitrite transporter;nitrate transporter NarK;Nitrate/nitrite antiporter NarK	568	569	1.00176	1	3166	417	1398	1395.43	1	1	1	1	1	1	1	1	1	1	1	1	1	1	1	1	1	1	1	1	1	1	1	1	1	1	1	1	1	1	1	1	1	1	1	1	1	1	1
proY	proY	proline-specific permease ProY	568	568	1	1	3165	1242	1371	1370.77	1	1	1	1	1	1	1	1	1	1	1	1	1	1	1	1	1	1	1	1	1	1	1	1	1	1	1	1	1	1	1	1	1	1	1	1	1	1	1
nuoK	nuoK	NADH-quinone oxidoreductase subunit NuoK	568	568	1	1	3163	213	303	302.842	1	1	1	1	1	1	1	1	1	1	1	1	1	1	1	1	1	1	1	1	1	1	1	1	1	1	1	1	1	1	1	1	1	1	1	1	1	1	1
ravA	ravA	ATPase RavA	568	568	1	1	3160	1368	1497	1496.77	1	1	1	1	1	1	1	1	1	1	1	1	1	1	1	1	1	1	1	1	1	1	1	1	1	1	1	1	1	1	1	1	1	1	1	1	1	1	1
argS	argS	arginine--tRNA ligase	568	568	1	1	3159	1605	1734	1733.77	1	1	1	1	1	1	1	1	1	1	1	1	1	1	1	1	1	1	1	1	1	1	1	1	1	1	1	1	1	1	1	1	1	1	1	1	1	1	1
group_1140		LysR family transcriptional regulator;hypothetical protein	568	568	1	1	3158	132	222	132.158	1	1	1	1	1	1	1	1	1	1	1	1	1	1	1	1	1	1	1	1	1	1	1	1	1	1	1	1	1	1	1	1	1	1	1	1	1	1	1
group_1139	gstA	glutathione S-transferase	568	568	1	1	3157	609	642	609.755	1	1	1	1	1	1	1	1	1	1	1	1	1	1	1	1	1	1	1	1	1	1	1	1	1	1	1	1	1	1	1	1	1	1	1	1	1	1	1
group_1138		hypothetical protein;zinc ribbon-containing protein	568	568	1	1	3156	309	474	473.71	1	1	1	1	1	1	1	1	1	1	1	1	1	1	1	1	1	1	1	1	1	1	1	1	1	1	1	1	1	1	1	1	1	1	1	1	1	1	1
ettA	ettA	energy-dependent translational throttle protein EttA	568	568	1	1	3155	1668	1743	1668.13	1	1	1	1	1	1	1	1	1	1	1	1	1	1	1	1	1	1	1	1	1	1	1	1	1	1	1	1	1	1	1	1	1	1	1	1	1	1	1
cspD	cspD	hypothetical protein;cold shock-like protein CspD	568	568	1	1	3154	162	222	221.894	1	1	1	1	1	1	1	1	1	1	1	1	1	1	1	1	1	1	1	1	1	1	1	1	1	1	1	1	1	1	1	1	1	1	1	1	1	1	1
yesN	yesN	AraC family transcriptional regulator;Two-component response regulator YesN/AraC family consists of REC and AraC-type DNA-binding domains	568	568	1	1	3153	663	816	815.731	1	1	1	1	1	1	1	1	1	1	1	1	1	1	1	1	1	1	1	1	1	1	1	1	1	1	1	1	1	1	1	1	1	1	1	1	1	1	1
metK	metK	methionine adenosyltransferase	568	568	1	1	3150	1155	1242	1155.15	1	1	1	1	1	1	1	1	1	1	1	1	1	1	1	1	1	1	1	1	1	1	1	1	1	1	1	1	1	1	1	1	1	1	1	1	1	1	1
group_1136		ZirS-C domain-containing protein	568	568	1	1	3149	753	825	824.869	1	1	1	1	1	1	1	1	1	1	1	1	1	1	1	1	1	1	1	1	1	1	1	1	1	1	1	1	1	1	1	1	1	1	1	1	1	1	1
group_1135		Serine/threonine protein kinase;Lipoprotein	568	568	1	1	3148	384	687	686.466	1	1	1	1	1	1	1	1	1	1	1	1	1	1	1	1	1	1	1	1	1	1	1	1	1	1	1	1	1	1	1	1	1	1	1	1	1	1	1
tal	tal	transaldolase;Transaldolase A	568	570	1.00352	1	3147	225	951	947.884	1	1	1	1	1	1	1	1	1	1	1	1	1	1	1	1	1	1	1	1	1	1	1	1	1	1	1	1	1	1	1	1	1	1	1	1	1	1	1
group_1134		Putative cytoplasmic protein;Cytoplasmic protein	568	568	1	1	3146	165	231	230.884	1	1	1	1	1	1	1	1	1	1	1	1	1	1	1	1	1	1	1	1	1	1	1	1	1	1	1	1	1	1	1	1	1	1	1	1	1	1	1
rsmJ	rsmJ	Ribosomal RNA small subunit methyltransferase J;16S rRNA (guanine(1516)-N(2))-methyltransferase RsmJ	568	568	1	1	3144	630	759	758.773	1	1	1	1	1	1	1	1	1	1	1	1	1	1	1	1	1	1	1	1	1	1	1	1	1	1	1	1	1	1	1	1	1	1	1	1	1	1	1
yccF	yccF	Inner membrane protein YccF;YccF domain-containing protein	568	569	1.00176	1	3143	171	447	446.04	1	1	1	1	1	1	1	1	1	1	1	1	1	1	1	1	1	1	1	1	1	1	1	1	1	1	1	1	1	1	1	1	1	1	1	1	1	1	1
gppA~~~ppx	gppA;ppx	Exopolyphosphatase;exopolyphosphatase	568	571	1.00528	1	3142	357	1542	1533.15	1	1	1	1	1	1	1	1	1	1	1	1	1	1	1	1	1	1	1	1	1	1	1	1	1	1	1	1	1	1	1	1	1	1	1	1	1	1	1
glgP~~~malP	glgP;malP	Glucan phosphorylase;Alpha-14 glucan phosphorylase;Maltodextrin phosphorylase;maltodextrin phosphorylase	568	571	1.00528	1	3141	258	2394	2381.4	1	1	1	1	1	1	1	1	1	1	1	1	1	1	1	1	1	1	1	1	1	1	1	1	1	1	1	1	1	1	1	1	1	1	1	1	1	1	1
trmH	trmH	tRNA (guanosine(18)-2'-O)-methyltransferase TrmH	568	568	1	1	3140	420	690	682.394	1	1	1	1	1	1	1	1	1	1	1	1	1	1	1	1	1	1	1	1	1	1	1	1	1	1	1	1	1	1	1	1	1	1	1	1	1	1	1
nrdF	nrdF	class 1b ribonucleoside-diphosphate reductase subunit beta	568	568	1	1	3139	855	960	959.815	1	1	1	1	1	1	1	1	1	1	1	1	1	1	1	1	1	1	1	1	1	1	1	1	1	1	1	1	1	1	1	1	1	1	1	1	1	1	1
treC	treC	alphaalpha-phosphotrehalase	568	568	1	1	3138	1608	1653	1652.68	1	1	1	1	1	1	1	1	1	1	1	1	1	1	1	1	1	1	1	1	1	1	1	1	1	1	1	1	1	1	1	1	1	1	1	1	1	1	1
rhlE	rhlE	ATP-dependent RNA helicase RhlE	568	568	1	1	3137	1260	1581	1365.2	1	1	1	1	1	1	1	1	1	1	1	1	1	1	1	1	1	1	1	1	1	1	1	1	1	1	1	1	1	1	1	1	1	1	1	1	1	1	1
pTR2	pTR2	MFS transporter;Dipeptide/tripeptide permease	568	568	1	1	3136	1323	1461	1460.76	1	1	1	1	1	1	1	1	1	1	1	1	1	1	1	1	1	1	1	1	1	1	1	1	1	1	1	1	1	1	1	1	1	1	1	1	1	1	1
sixA	sixA	phosphohistidine phosphatase SixA	568	568	1	1	3135	486	486	486	1	1	1	1	1	1	1	1	1	1	1	1	1	1	1	1	1	1	1	1	1	1	1	1	1	1	1	1	1	1	1	1	1	1	1	1	1	1	1
group_1132	ybdD	DUF466 domain-containing protein	568	568	1	1	3133	153	204	203.91	1	1	1	1	1	1	1	1	1	1	1	1	1	1	1	1	1	1	1	1	1	1	1	1	1	1	1	1	1	1	1	1	1	1	1	1	1	1	1
rlmD	rlmD	hypothetical protein;23S rRNA (uracil(1939)-C(5))-methyltransferase RlmD	568	569	1.00176	1	3131	480	1296	1293.59	1	1	1	1	1	1	1	1	1	1	1	1	1	1	1	1	1	1	1	1	1	1	1	1	1	1	1	1	1	1	1	1	1	1	1	1	1	1	1
group_1130		hypothetical protein;IgGFc-binding domain-containing protein	568	568	1	1	3130	801	1032	1027.53	1	1	1	1	1	1	1	1	1	1	1	1	1	1	1	1	1	1	1	1	1	1	1	1	1	1	1	1	1	1	1	1	1	1	1	1	1	1	1
uvrB	uvrB	UvrABC system protein B;excinuclease ABC subunit UvrB	568	568	1	1	3129	786	2022	2019.82	1	1	1	1	1	1	1	1	1	1	1	1	1	1	1	1	1	1	1	1	1	1	1	1	1	1	1	1	1	1	1	1	1	1	1	1	1	1	1
ybhK	ybhK	Putative gluconeogenesis factor	568	568	1	1	3128	795	909	908.799	1	1	1	1	1	1	1	1	1	1	1	1	1	1	1	1	1	1	1	1	1	1	1	1	1	1	1	1	1	1	1	1	1	1	1	1	1	1	1
group_1129	araC	AraC family transcriptional regulator;AraC-type DNA-binding domain and AraC-containing proteins	568	568	1	1	3127	702	762	761.894	1	1	1	1	1	1	1	1	1	1	1	1	1	1	1	1	1	1	1	1	1	1	1	1	1	1	1	1	1	1	1	1	1	1	1	1	1	1	1
group_1127	hybA	hypothetical protein;Fe-S-cluster-containing dehydrogenase component (DMSO reductase)	568	568	1	1	3125	414	558	557.746	1	1	1	1	1	1	1	1	1	1	1	1	1	1	1	1	1	1	1	1	1	1	1	1	1	1	1	1	1	1	1	1	1	1	1	1	1	1	1
ubiG	ubiG	bifunctional 2-polyprenyl-6-hydroxyphenol methylase/3-demethylubiquinol 3-O-methyltransferase UbiG	568	568	1	1	3124	621	729	728.81	1	1	1	1	1	1	1	1	1	1	1	1	1	1	1	1	1	1	1	1	1	1	1	1	1	1	1	1	1	1	1	1	1	1	1	1	1	1	1
feoA	feoA	Ferrous iron transport protein A;ferrous iron transporter A	568	568	1	1	3123	168	228	227.894	1	1	1	1	1	1	1	1	1	1	1	1	1	1	1	1	1	1	1	1	1	1	1	1	1	1	1	1	1	1	1	1	1	1	1	1	1	1	1
yhcC	yhcC	Radical-SAM-C domain-containing protein;TIGR01212 family radical SAM protein	568	569	1.00176	1	3122	261	930	928.344	1	1	1	1	1	1	1	1	1	1	1	1	1	1	1	1	1	1	1	1	1	1	1	1	1	1	1	1	1	1	1	1	1	1	1	1	1	1	1
pbpC	pbpC	Penicillin-binding protein 1C;peptidoglycan glycosyltransferase PbpC	568	570	1.00352	1	3121	213	2316	2290.54	1	1	1	1	1	1	1	1	1	1	1	1	1	1	1	1	1	1	1	1	1	1	1	1	1	1	1	1	1	1	1	1	1	1	1	1	1	1	1
dgkA	dgkA	Diacylglycerol kinase	568	568	1	1	3120	252	369	368.794	1	1	1	1	1	1	1	1	1	1	1	1	1	1	1	1	1	1	1	1	1	1	1	1	1	1	1	1	1	1	1	1	1	1	1	1	1	1	1
group_1125	yecT	hypothetical protein;DUF1311 domain-containing protein	568	568	1	1	3118	576	828	825.782	1	1	1	1	1	1	1	1	1	1	1	1	1	1	1	1	1	1	1	1	1	1	1	1	1	1	1	1	1	1	1	1	1	1	1	1	1	1	1
hemC	hemC	hydroxymethylbilane synthase	568	568	1	1	3117	942	963	962.963	1	1	1	1	1	1	1	1	1	1	1	1	1	1	1	1	1	1	1	1	1	1	1	1	1	1	1	1	1	1	1	1	1	1	1	1	1	1	1
group_1124	uxaA	D-galactarate dehydratase;Altronate dehydratase	568	568	1	1	3115	276	291	290.974	1	1	1	1	1	1	1	1	1	1	1	1	1	1	1	1	1	1	1	1	1	1	1	1	1	1	1	1	1	1	1	1	1	1	1	1	1	1	1
pncB	pncB	nicotinate phosphoribosyltransferase	568	568	1	1	3114	1203	1245	1203.07	1	1	1	1	1	1	1	1	1	1	1	1	1	1	1	1	1	1	1	1	1	1	1	1	1	1	1	1	1	1	1	1	1	1	1	1	1	1	1
bcfB	bcfB	fimbrial biogenesis chaperone BcfB	568	568	1	1	3113	654	687	686.884	1	1	1	1	1	1	1	1	1	1	1	1	1	1	1	1	1	1	1	1	1	1	1	1	1	1	1	1	1	1	1	1	1	1	1	1	1	1	1
yjgN	yjgN	DUF898 domain-containing protein;Inner membrane protein YjgN	568	568	1	1	3109	849	1188	1185.7	1	1	1	1	1	1	1	1	1	1	1	1	1	1	1	1	1	1	1	1	1	1	1	1	1	1	1	1	1	1	1	1	1	1	1	1	1	1	1
gcvH	gcvH	glycine cleavage system protein GcvH	568	568	1	1	3108	273	390	389.794	1	1	1	1	1	1	1	1	1	1	1	1	1	1	1	1	1	1	1	1	1	1	1	1	1	1	1	1	1	1	1	1	1	1	1	1	1	1	1
group_1122		hypothetical protein;Cytoplasmic protein	568	568	1	1	3107	102	177	102.132	1	1	1	1	1	1	1	1	1	1	1	1	1	1	1	1	1	1	1	1	1	1	1	1	1	1	1	1	1	1	1	1	1	1	1	1	1	1	1
group_1121		chitinase;Chitodextrinase	568	568	1	1	3105	2028	2100	2099.75	1	1	1	1	1	1	1	1	1	1	1	1	1	1	1	1	1	1	1	1	1	1	1	1	1	1	1	1	1	1	1	1	1	1	1	1	1	1	1
rluC	rluC	23S rRNA pseudouridine(955/2504/2580) synthase RluC	568	568	1	1	3104	954	1044	1043.68	1	1	1	1	1	1	1	1	1	1	1	1	1	1	1	1	1	1	1	1	1	1	1	1	1	1	1	1	1	1	1	1	1	1	1	1	1	1	1
pilV	pilV	prepilin-type N-terminal cleavage/methylation domain-containing protein	568	568	1	1	3103	159	321	317.863	1	1	1	1	1	1	1	1	1	1	1	1	1	1	1	1	1	1	1	1	1	1	1	1	1	1	1	1	1	1	1	1	1	1	1	1	1	1	1
group_1120		hypothetical protein;DUF4332 domain-containing protein	568	568	1	1	3102	552	567	566.974	1	1	1	1	1	1	1	1	1	1	1	1	1	1	1	1	1	1	1	1	1	1	1	1	1	1	1	1	1	1	1	1	1	1	1	1	1	1	1
ptrA	ptrA	pitrilysin	568	568	1	1	3100	2733	2889	2888.73	1	1	1	1	1	1	1	1	1	1	1	1	1	1	1	1	1	1	1	1	1	1	1	1	1	1	1	1	1	1	1	1	1	1	1	1	1	1	1
baeS~~~qseE	baeS;qseE	Signal transduction histidine kinase;two component system sensor histidine kinase QseE/GlrK	568	568	1	1	3097	1302	1386	1385.85	1	1	1	1	1	1	1	1	1	1	1	1	1	1	1	1	1	1	1	1	1	1	1	1	1	1	1	1	1	1	1	1	1	1	1	1	1	1	1
group_1118		DUF3251 domain-containing protein	568	568	1	1	3096	510	609	608.826	1	1	1	1	1	1	1	1	1	1	1	1	1	1	1	1	1	1	1	1	1	1	1	1	1	1	1	1	1	1	1	1	1	1	1	1	1	1	1
ldtD	ldtD	LD-transpeptidase	568	568	1	1	3095	1641	1848	1847.64	1	1	1	1	1	1	1	1	1	1	1	1	1	1	1	1	1	1	1	1	1	1	1	1	1	1	1	1	1	1	1	1	1	1	1	1	1	1	1
group_1117		thioredoxin-disulfide reductase;hypothetical protein;Thioredoxin-disulfide reductase	568	568	1	1	3094	495	774	770.366	1	1	1	1	1	1	1	1	1	1	1	1	1	1	1	1	1	1	1	1	1	1	1	1	1	1	1	1	1	1	1	1	1	1	1	1	1	1	1
ppdD	ppdD	prepilin peptidase-dependent pilin	568	568	1	1	3080	438	438	438	1	1	1	1	1	1	1	1	1	1	1	1	1	1	1	1	1	1	1	1	1	1	1	1	1	1	1	1	1	1	1	1	1	1	1	1	1	1	1
group_1102	xerD	Site-specific recombinase XerD	568	568	1	1	3073	567	567	567	1	1	1	1	1	1	1	1	1	1	1	1	1	1	1	1	1	1	1	1	1	1	1	1	1	1	1	1	1	1	1	1	1	1	1	1	1	1	1
hns	hns	DNA-binding transcriptional regulator H-NS	568	568	1	1	3069	414	414	414	1	1	1	1	1	1	1	1	1	1	1	1	1	1	1	1	1	1	1	1	1	1	1	1	1	1	1	1	1	1	1	1	1	1	1	1	1	1	1
group_1039	lysR	DNA-binding transcriptional regulator LysR family	568	568	1	1	2961	900	900	900	1	1	1	1	1	1	1	1	1	1	1	1	1	1	1	1	1	1	1	1	1	1	1	1	1	1	1	1	1	1	1	1	1	1	1	1	1	1	1
group_1032	yhjY	putative conserved protein YhjY contains autotransporter beta-barrel domain	568	568	1	1	2938	705	705	705	1	1	1	1	1	1	1	1	1	1	1	1	1	1	1	1	1	1	1	1	1	1	1	1	1	1	1	1	1	1	1	1	1	1	1	1	1	1	1
group_1031	tag	DNA-3-methyladenine glycosylase I	568	568	1	1	2937	582	582	582	1	1	1	1	1	1	1	1	1	1	1	1	1	1	1	1	1	1	1	1	1	1	1	1	1	1	1	1	1	1	1	1	1	1	1	1	1	1	1
pmrR	pmrR	LpxT activity modulator PmrR	568	568	1	1	2929	90	90	90	1	1	1	1	1	1	1	1	1	1	1	1	1	1	1	1	1	1	1	1	1	1	1	1	1	1	1	1	1	1	1	1	1	1	1	1	1	1	1
ynhF	ynhF	YnhF family membrane protein	568	568	1	1	2928	90	90	90	1	1	1	1	1	1	1	1	1	1	1	1	1	1	1	1	1	1	1	1	1	1	1	1	1	1	1	1	1	1	1	1	1	1	1	1	1	1	1
group_1028		putative outer membrane lipoprotein	568	568	1	1	2927	90	90	90	1	1	1	1	1	1	1	1	1	1	1	1	1	1	1	1	1	1	1	1	1	1	1	1	1	1	1	1	1	1	1	1	1	1	1	1	1	1	1
group_1027		hypothetical protein	568	568	1	1	2925	93	93	93	1	1	1	1	1	1	1	1	1	1	1	1	1	1	1	1	1	1	1	1	1	1	1	1	1	1	1	1	1	1	1	1	1	1	1	1	1	1	1
mgtR	mgtR	protein MgtR	568	568	1	1	2923	93	93	93	1	1	1	1	1	1	1	1	1	1	1	1	1	1	1	1	1	1	1	1	1	1	1	1	1	1	1	1	1	1	1	1	1	1	1	1	1	1	1
group_1024		Cytochrome d ubiquinol oxidase subunit II	568	568	1	1	2920	96	96	96	1	1	1	1	1	1	1	1	1	1	1	1	1	1	1	1	1	1	1	1	1	1	1	1	1	1	1	1	1	1	1	1	1	1	1	1	1	1	1
group_1023		Antirestriction protein	568	568	1	1	2919	96	96	96	1	1	1	1	1	1	1	1	1	1	1	1	1	1	1	1	1	1	1	1	1	1	1	1	1	1	1	1	1	1	1	1	1	1	1	1	1	1	1
pyrL	pyrL	pyr operon leader peptide	568	568	1	1	2915	102	102	102	1	1	1	1	1	1	1	1	1	1	1	1	1	1	1	1	1	1	1	1	1	1	1	1	1	1	1	1	1	1	1	1	1	1	1	1	1	1	1
group_1019		Cytoplasmic protein	568	568	1	1	2914	105	105	105	1	1	1	1	1	1	1	1	1	1	1	1	1	1	1	1	1	1	1	1	1	1	1	1	1	1	1	1	1	1	1	1	1	1	1	1	1	1	1
group_1017		Inner membrane protein	568	568	1	1	2911	108	108	108	1	1	1	1	1	1	1	1	1	1	1	1	1	1	1	1	1	1	1	1	1	1	1	1	1	1	1	1	1	1	1	1	1	1	1	1	1	1	1
group_1016		ABC transporter permease	568	568	1	1	2910	108	108	108	1	1	1	1	1	1	1	1	1	1	1	1	1	1	1	1	1	1	1	1	1	1	1	1	1	1	1	1	1	1	1	1	1	1	1	1	1	1	1
group_1015		Cytoplasmic protein	568	568	1	1	2909	111	111	111	1	1	1	1	1	1	1	1	1	1	1	1	1	1	1	1	1	1	1	1	1	1	1	1	1	1	1	1	1	1	1	1	1	1	1	1	1	1	1
group_1013		DUF2770 domain-containing protein	568	568	1	1	2907	114	114	114	1	1	1	1	1	1	1	1	1	1	1	1	1	1	1	1	1	1	1	1	1	1	1	1	1	1	1	1	1	1	1	1	1	1	1	1	1	1	1
group_1012		Transporter	568	568	1	1	2906	114	114	114	1	1	1	1	1	1	1	1	1	1	1	1	1	1	1	1	1	1	1	1	1	1	1	1	1	1	1	1	1	1	1	1	1	1	1	1	1	1	1
group_1011		Inner membrane protein	568	568	1	1	2905	114	114	114	1	1	1	1	1	1	1	1	1	1	1	1	1	1	1	1	1	1	1	1	1	1	1	1	1	1	1	1	1	1	1	1	1	1	1	1	1	1	1
rpmJ	rpmJ	50S ribosomal protein L36	568	568	1	1	2900	117	117	117	1	1	1	1	1	1	1	1	1	1	1	1	1	1	1	1	1	1	1	1	1	1	1	1	1	1	1	1	1	1	1	1	1	1	1	1	1	1	1
sgrT	sgrT	Glucose uptake inhibitor SgrT	568	568	1	1	2896	123	123	123	1	1	1	1	1	1	1	1	1	1	1	1	1	1	1	1	1	1	1	1	1	1	1	1	1	1	1	1	1	1	1	1	1	1	1	1	1	1	1
group_1003	lysR	DNA-binding transcriptional regulator LysR family	568	568	1	1	2895	123	123	123	1	1	1	1	1	1	1	1	1	1	1	1	1	1	1	1	1	1	1	1	1	1	1	1	1	1	1	1	1	1	1	1	1	1	1	1	1	1	1
group_1002		Lipoprotein	568	568	1	1	2894	126	126	126	1	1	1	1	1	1	1	1	1	1	1	1	1	1	1	1	1	1	1	1	1	1	1	1	1	1	1	1	1	1	1	1	1	1	1	1	1	1	1
mntS	mntS	manganase accumulation protein MntS	568	568	1	1	2891	129	129	129	1	1	1	1	1	1	1	1	1	1	1	1	1	1	1	1	1	1	1	1	1	1	1	1	1	1	1	1	1	1	1	1	1	1	1	1	1	1	1
ymiA	ymiA	YmiA family putative membrane protein	568	568	1	1	2889	129	129	129	1	1	1	1	1	1	1	1	1	1	1	1	1	1	1	1	1	1	1	1	1	1	1	1	1	1	1	1	1	1	1	1	1	1	1	1	1	1	1
group_997		DUF2474 domain-containing protein	568	568	1	1	2887	132	132	132	1	1	1	1	1	1	1	1	1	1	1	1	1	1	1	1	1	1	1	1	1	1	1	1	1	1	1	1	1	1	1	1	1	1	1	1	1	1	1
yodC	yodC	DUF2158 domain-containing protein	568	568	1	1	2885	135	135	135	1	1	1	1	1	1	1	1	1	1	1	1	1	1	1	1	1	1	1	1	1	1	1	1	1	1	1	1	1	1	1	1	1	1	1	1	1	1	1
group_993		Inner membrane protein	568	568	1	1	2882	138	138	138	1	1	1	1	1	1	1	1	1	1	1	1	1	1	1	1	1	1	1	1	1	1	1	1	1	1	1	1	1	1	1	1	1	1	1	1	1	1	1
group_991		DUF5681 domain-containing protein	568	568	1	1	2880	141	141	141	1	1	1	1	1	1	1	1	1	1	1	1	1	1	1	1	1	1	1	1	1	1	1	1	1	1	1	1	1	1	1	1	1	1	1	1	1	1	1
ykgO	ykgO	type B 50S ribosomal protein L36	568	568	1	1	2879	141	141	141	1	1	1	1	1	1	1	1	1	1	1	1	1	1	1	1	1	1	1	1	1	1	1	1	1	1	1	1	1	1	1	1	1	1	1	1	1	1	1
group_988		hypothetical protein	568	568	1	1	2876	144	144	144	1	1	1	1	1	1	1	1	1	1	1	1	1	1	1	1	1	1	1	1	1	1	1	1	1	1	1	1	1	1	1	1	1	1	1	1	1	1	1
group_985		hypothetical protein	568	568	1	1	2872	147	147	147	1	1	1	1	1	1	1	1	1	1	1	1	1	1	1	1	1	1	1	1	1	1	1	1	1	1	1	1	1	1	1	1	1	1	1	1	1	1	1
acrZ	acrZ	Multidrug efflux pump accessory protein AcrZ	568	568	1	1	2870	150	150	150	1	1	1	1	1	1	1	1	1	1	1	1	1	1	1	1	1	1	1	1	1	1	1	1	1	1	1	1	1	1	1	1	1	1	1	1	1	1	1
group_982		Cytoplasmic protein	568	568	1	1	2867	153	153	153	1	1	1	1	1	1	1	1	1	1	1	1	1	1	1	1	1	1	1	1	1	1	1	1	1	1	1	1	1	1	1	1	1	1	1	1	1	1	1
group_976		MBL fold metallo-hydrolase	568	568	1	1	2860	159	159	159	1	1	1	1	1	1	1	1	1	1	1	1	1	1	1	1	1	1	1	1	1	1	1	1	1	1	1	1	1	1	1	1	1	1	1	1	1	1	1
group_974		hypothetical protein	568	568	1	1	2858	159	159	159	1	1	1	1	1	1	1	1	1	1	1	1	1	1	1	1	1	1	1	1	1	1	1	1	1	1	1	1	1	1	1	1	1	1	1	1	1	1	1
xapX	xapX	XapX domain-containing protein	568	568	1	1	2857	159	159	159	1	1	1	1	1	1	1	1	1	1	1	1	1	1	1	1	1	1	1	1	1	1	1	1	1	1	1	1	1	1	1	1	1	1	1	1	1	1	1
yqaE	yqaE	Membrane putative modulator PMP3/YqaE plasma membrane proteolipid 3 (PMP3)/Esi3/RCI2/UPF0057 family	568	568	1	1	2856	159	159	159	1	1	1	1	1	1	1	1	1	1	1	1	1	1	1	1	1	1	1	1	1	1	1	1	1	1	1	1	1	1	1	1	1	1	1	1	1	1	1
ytjA	ytjA	UPF0391 membrane protein YtjA	568	568	1	1	2853	162	162	162	1	1	1	1	1	1	1	1	1	1	1	1	1	1	1	1	1	1	1	1	1	1	1	1	1	1	1	1	1	1	1	1	1	1	1	1	1	1	1
group_971		Arylsulfotran-N domain-containing protein	568	568	1	1	2852	162	162	162	1	1	1	1	1	1	1	1	1	1	1	1	1	1	1	1	1	1	1	1	1	1	1	1	1	1	1	1	1	1	1	1	1	1	1	1	1	1	1
group_968	yhaK	Pirin-like protein YhaK	568	568	1	1	2848	165	165	165	1	1	1	1	1	1	1	1	1	1	1	1	1	1	1	1	1	1	1	1	1	1	1	1	1	1	1	1	1	1	1	1	1	1	1	1	1	1	1
group_967		Periplasmic protein	568	568	1	1	2847	165	165	165	1	1	1	1	1	1	1	1	1	1	1	1	1	1	1	1	1	1	1	1	1	1	1	1	1	1	1	1	1	1	1	1	1	1	1	1	1	1	1
rsmS	rsmS	pleiotropic regulatory protein RsmS	568	568	1	1	2845	168	168	168	1	1	1	1	1	1	1	1	1	1	1	1	1	1	1	1	1	1	1	1	1	1	1	1	1	1	1	1	1	1	1	1	1	1	1	1	1	1	1
group_964		Stress-induced bacterial acidophilic repeat motif	568	568	1	1	2843	168	168	168	1	1	1	1	1	1	1	1	1	1	1	1	1	1	1	1	1	1	1	1	1	1	1	1	1	1	1	1	1	1	1	1	1	1	1	1	1	1	1
rpmG	rpmG	50S ribosomal protein L33	568	568	1	1	2841	168	168	168	1	1	1	1	1	1	1	1	1	1	1	1	1	1	1	1	1	1	1	1	1	1	1	1	1	1	1	1	1	1	1	1	1	1	1	1	1	1	1
group_960		DUF4223 domain-containing protein	568	568	1	1	2838	171	171	171	1	1	1	1	1	1	1	1	1	1	1	1	1	1	1	1	1	1	1	1	1	1	1	1	1	1	1	1	1	1	1	1	1	1	1	1	1	1	1
group_957		Entericidin A/B family lipoprotein	568	568	1	1	2835	174	174	174	1	1	1	1	1	1	1	1	1	1	1	1	1	1	1	1	1	1	1	1	1	1	1	1	1	1	1	1	1	1	1	1	1	1	1	1	1	1	1
group_956		Transposase	568	568	1	1	2834	174	174	174	1	1	1	1	1	1	1	1	1	1	1	1	1	1	1	1	1	1	1	1	1	1	1	1	1	1	1	1	1	1	1	1	1	1	1	1	1	1	1
yciY	yciY	YciY family protein	568	568	1	1	2830	174	174	174	1	1	1	1	1	1	1	1	1	1	1	1	1	1	1	1	1	1	1	1	1	1	1	1	1	1	1	1	1	1	1	1	1	1	1	1	1	1	1
gns	gns	Protein gns	568	568	1	1	2829	174	174	174	1	1	1	1	1	1	1	1	1	1	1	1	1	1	1	1	1	1	1	1	1	1	1	1	1	1	1	1	1	1	1	1	1	1	1	1	1	1	1
group_951		Transposase	568	568	1	1	2827	174	174	174	1	1	1	1	1	1	1	1	1	1	1	1	1	1	1	1	1	1	1	1	1	1	1	1	1	1	1	1	1	1	1	1	1	1	1	1	1	1	1
group_948		AAA-23 domain-containing protein	568	568	1	1	2823	177	177	177	1	1	1	1	1	1	1	1	1	1	1	1	1	1	1	1	1	1	1	1	1	1	1	1	1	1	1	1	1	1	1	1	1	1	1	1	1	1	1
yoaH	yoaH	YoaH family protein	568	568	1	1	2816	180	180	180	1	1	1	1	1	1	1	1	1	1	1	1	1	1	1	1	1	1	1	1	1	1	1	1	1	1	1	1	1	1	1	1	1	1	1	1	1	1	1
group_942		Phage tail protein	568	568	1	1	2815	180	180	180	1	1	1	1	1	1	1	1	1	1	1	1	1	1	1	1	1	1	1	1	1	1	1	1	1	1	1	1	1	1	1	1	1	1	1	1	1	1	1
group_941		Transposase	568	568	1	1	2814	180	180	180	1	1	1	1	1	1	1	1	1	1	1	1	1	1	1	1	1	1	1	1	1	1	1	1	1	1	1	1	1	1	1	1	1	1	1	1	1	1	1
group_940	tusA	Sulfurtransferase TusA family protein	568	568	1	1	2813	180	180	180	1	1	1	1	1	1	1	1	1	1	1	1	1	1	1	1	1	1	1	1	1	1	1	1	1	1	1	1	1	1	1	1	1	1	1	1	1	1	1
rpmD	rpmD	50S ribosomal protein L30	568	568	1	1	2812	180	180	180	1	1	1	1	1	1	1	1	1	1	1	1	1	1	1	1	1	1	1	1	1	1	1	1	1	1	1	1	1	1	1	1	1	1	1	1	1	1	1
group_937		ABC transporter domain-containing protein	568	568	1	1	2809	183	183	183	1	1	1	1	1	1	1	1	1	1	1	1	1	1	1	1	1	1	1	1	1	1	1	1	1	1	1	1	1	1	1	1	1	1	1	1	1	1	1
ycaR	ycaR	protein YcaR	568	568	1	1	2808	183	183	183	1	1	1	1	1	1	1	1	1	1	1	1	1	1	1	1	1	1	1	1	1	1	1	1	1	1	1	1	1	1	1	1	1	1	1	1	1	1	1
group_936		Cytoplasmic protein	568	568	1	1	2807	183	183	183	1	1	1	1	1	1	1	1	1	1	1	1	1	1	1	1	1	1	1	1	1	1	1	1	1	1	1	1	1	1	1	1	1	1	1	1	1	1	1
csrA	csrA	carbon storage regulator CsrA	568	568	1	1	2802	186	186	186	1	1	1	1	1	1	1	1	1	1	1	1	1	1	1	1	1	1	1	1	1	1	1	1	1	1	1	1	1	1	1	1	1	1	1	1	1	1	1
group_929		Cytoplasmic protein	568	568	1	1	2797	189	189	189	1	1	1	1	1	1	1	1	1	1	1	1	1	1	1	1	1	1	1	1	1	1	1	1	1	1	1	1	1	1	1	1	1	1	1	1	1	1	1
group_925		Transposase	568	568	1	1	2793	192	192	192	1	1	1	1	1	1	1	1	1	1	1	1	1	1	1	1	1	1	1	1	1	1	1	1	1	1	1	1	1	1	1	1	1	1	1	1	1	1	1
group_924		Arylsulfatase	568	568	1	1	2792	192	192	192	1	1	1	1	1	1	1	1	1	1	1	1	1	1	1	1	1	1	1	1	1	1	1	1	1	1	1	1	1	1	1	1	1	1	1	1	1	1	1
yacG	yacG	DNA gyrase inhibitor YacG	568	568	1	1	2791	192	192	192	1	1	1	1	1	1	1	1	1	1	1	1	1	1	1	1	1	1	1	1	1	1	1	1	1	1	1	1	1	1	1	1	1	1	1	1	1	1	1
yaiA	yaiA	Protein YaiA	568	568	1	1	2790	192	192	192	1	1	1	1	1	1	1	1	1	1	1	1	1	1	1	1	1	1	1	1	1	1	1	1	1	1	1	1	1	1	1	1	1	1	1	1	1	1	1
hemP	hemP	Hemin uptake protein HemP	568	568	1	1	2788	192	192	192	1	1	1	1	1	1	1	1	1	1	1	1	1	1	1	1	1	1	1	1	1	1	1	1	1	1	1	1	1	1	1	1	1	1	1	1	1	1	1
group_922		Conserved domain protein	568	568	1	1	2787	192	192	192	1	1	1	1	1	1	1	1	1	1	1	1	1	1	1	1	1	1	1	1	1	1	1	1	1	1	1	1	1	1	1	1	1	1	1	1	1	1	1
group_920		DUF2633 domain-containing protein	568	568	1	1	2785	192	192	192	1	1	1	1	1	1	1	1	1	1	1	1	1	1	1	1	1	1	1	1	1	1	1	1	1	1	1	1	1	1	1	1	1	1	1	1	1	1	1
group_919		Agmatinase	568	568	1	1	2784	192	192	192	1	1	1	1	1	1	1	1	1	1	1	1	1	1	1	1	1	1	1	1	1	1	1	1	1	1	1	1	1	1	1	1	1	1	1	1	1	1	1
rpmC	rpmC	50S ribosomal protein L29	568	568	1	1	2783	192	192	192	1	1	1	1	1	1	1	1	1	1	1	1	1	1	1	1	1	1	1	1	1	1	1	1	1	1	1	1	1	1	1	1	1	1	1	1	1	1	1
dsrB	dsrB	protein DsrB	568	568	1	1	2777	195	195	195	1	1	1	1	1	1	1	1	1	1	1	1	1	1	1	1	1	1	1	1	1	1	1	1	1	1	1	1	1	1	1	1	1	1	1	1	1	1	1
bfd	bfd	bacterioferritin-associated ferredoxin	568	568	1	1	2775	195	195	195	1	1	1	1	1	1	1	1	1	1	1	1	1	1	1	1	1	1	1	1	1	1	1	1	1	1	1	1	1	1	1	1	1	1	1	1	1	1	1
group_912		Hydrolase	568	568	1	1	2773	198	198	198	1	1	1	1	1	1	1	1	1	1	1	1	1	1	1	1	1	1	1	1	1	1	1	1	1	1	1	1	1	1	1	1	1	1	1	1	1	1	1
yjeT	yjeT	DUF2065 domain-containing protein	568	568	1	1	2772	198	198	198	1	1	1	1	1	1	1	1	1	1	1	1	1	1	1	1	1	1	1	1	1	1	1	1	1	1	1	1	1	1	1	1	1	1	1	1	1	1	1
ybdD	ybdD	DUF466 domain-containing protein	568	568	1	1	2770	198	198	198	1	1	1	1	1	1	1	1	1	1	1	1	1	1	1	1	1	1	1	1	1	1	1	1	1	1	1	1	1	1	1	1	1	1	1	1	1	1	1
group_910		Cytoplasmic protein	568	568	1	1	2769	198	198	198	1	1	1	1	1	1	1	1	1	1	1	1	1	1	1	1	1	1	1	1	1	1	1	1	1	1	1	1	1	1	1	1	1	1	1	1	1	1	1
group_909		50S ribosomal protein L35	568	568	1	1	2768	198	198	198	1	1	1	1	1	1	1	1	1	1	1	1	1	1	1	1	1	1	1	1	1	1	1	1	1	1	1	1	1	1	1	1	1	1	1	1	1	1	1
group_908		Transposase	568	568	1	1	2767	198	198	198	1	1	1	1	1	1	1	1	1	1	1	1	1	1	1	1	1	1	1	1	1	1	1	1	1	1	1	1	1	1	1	1	1	1	1	1	1	1	1
yaeP	yaeP	YaeP family protein	568	568	1	1	2764	201	201	201	1	1	1	1	1	1	1	1	1	1	1	1	1	1	1	1	1	1	1	1	1	1	1	1	1	1	1	1	1	1	1	1	1	1	1	1	1	1	1
ypfN	ypfN	UPF0370 protein YpfN	568	568	1	1	2763	201	201	201	1	1	1	1	1	1	1	1	1	1	1	1	1	1	1	1	1	1	1	1	1	1	1	1	1	1	1	1	1	1	1	1	1	1	1	1	1	1	1
iscX	iscX	Fe-S cluster assembly protein IscX	568	568	1	1	2762	201	201	201	1	1	1	1	1	1	1	1	1	1	1	1	1	1	1	1	1	1	1	1	1	1	1	1	1	1	1	1	1	1	1	1	1	1	1	1	1	1	1
kefB	kefB	glutathione-regulated potassium-efflux system protein KefB	568	568	1	1	2761	201	201	201	1	1	1	1	1	1	1	1	1	1	1	1	1	1	1	1	1	1	1	1	1	1	1	1	1	1	1	1	1	1	1	1	1	1	1	1	1	1	1
yifL	yifL	putative lipoprotein YifL	568	568	1	1	2754	204	204	204	1	1	1	1	1	1	1	1	1	1	1	1	1	1	1	1	1	1	1	1	1	1	1	1	1	1	1	1	1	1	1	1	1	1	1	1	1	1	1
tatE	tatE	twin-arginine translocase subunit TatE	568	568	1	1	2753	204	204	204	1	1	1	1	1	1	1	1	1	1	1	1	1	1	1	1	1	1	1	1	1	1	1	1	1	1	1	1	1	1	1	1	1	1	1	1	1	1	1
aaeX	aaeX	p-hydroxybenzoic acid efflux pump operon protein AaeX	568	568	1	1	2752	204	204	204	1	1	1	1	1	1	1	1	1	1	1	1	1	1	1	1	1	1	1	1	1	1	1	1	1	1	1	1	1	1	1	1	1	1	1	1	1	1	1
ytfK	ytfK	putative protein YtfK	568	568	1	1	2746	207	207	207	1	1	1	1	1	1	1	1	1	1	1	1	1	1	1	1	1	1	1	1	1	1	1	1	1	1	1	1	1	1	1	1	1	1	1	1	1	1	1
group_896		Ovule protein	568	568	1	1	2745	207	207	207	1	1	1	1	1	1	1	1	1	1	1	1	1	1	1	1	1	1	1	1	1	1	1	1	1	1	1	1	1	1	1	1	1	1	1	1	1	1	1
group_894		Invasin	568	568	1	1	2742	207	207	207	1	1	1	1	1	1	1	1	1	1	1	1	1	1	1	1	1	1	1	1	1	1	1	1	1	1	1	1	1	1	1	1	1	1	1	1	1	1	1
yibT	yibT	putative protein YibT	568	568	1	1	2736	210	210	210	1	1	1	1	1	1	1	1	1	1	1	1	1	1	1	1	1	1	1	1	1	1	1	1	1	1	1	1	1	1	1	1	1	1	1	1	1	1	1
yjbJ	yjbJ	UPF0337 protein YjbJ	568	568	1	1	2731	213	213	213	1	1	1	1	1	1	1	1	1	1	1	1	1	1	1	1	1	1	1	1	1	1	1	1	1	1	1	1	1	1	1	1	1	1	1	1	1	1	1
ybcJ	ybcJ	ribosome-associated protein YbcJ	568	568	1	1	2729	213	213	213	1	1	1	1	1	1	1	1	1	1	1	1	1	1	1	1	1	1	1	1	1	1	1	1	1	1	1	1	1	1	1	1	1	1	1	1	1	1	1
fumD	fumD	fumarate hydratase FumD	568	568	1	1	2728	213	213	213	1	1	1	1	1	1	1	1	1	1	1	1	1	1	1	1	1	1	1	1	1	1	1	1	1	1	1	1	1	1	1	1	1	1	1	1	1	1	1
cspJ	cspJ	Cold shock-like protein CspJ	568	568	1	1	2727	213	213	213	1	1	1	1	1	1	1	1	1	1	1	1	1	1	1	1	1	1	1	1	1	1	1	1	1	1	1	1	1	1	1	1	1	1	1	1	1	1	1
cspA	cspA	Cold shock protein CspA	568	568	1	1	2726	213	213	213	1	1	1	1	1	1	1	1	1	1	1	1	1	1	1	1	1	1	1	1	1	1	1	1	1	1	1	1	1	1	1	1	1	1	1	1	1	1	1
rpsU	rpsU	30S ribosomal protein S21	568	568	1	1	2722	216	216	216	1	1	1	1	1	1	1	1	1	1	1	1	1	1	1	1	1	1	1	1	1	1	1	1	1	1	1	1	1	1	1	1	1	1	1	1	1	1	1
hha	hha	Hemolysin expression-modulating protein Hha	568	568	1	1	2718	219	219	219	1	1	1	1	1	1	1	1	1	1	1	1	1	1	1	1	1	1	1	1	1	1	1	1	1	1	1	1	1	1	1	1	1	1	1	1	1	1	1
group_879		Transposase	568	568	1	1	2717	219	219	219	1	1	1	1	1	1	1	1	1	1	1	1	1	1	1	1	1	1	1	1	1	1	1	1	1	1	1	1	1	1	1	1	1	1	1	1	1	1	1
mbtH	mbtH	MbtH family protein regulates adenylation domains of NRPSs	568	568	1	1	2716	219	219	219	1	1	1	1	1	1	1	1	1	1	1	1	1	1	1	1	1	1	1	1	1	1	1	1	1	1	1	1	1	1	1	1	1	1	1	1	1	1	1
infA	infA	translation initiation factor IF-1	568	568	1	1	2715	219	219	219	1	1	1	1	1	1	1	1	1	1	1	1	1	1	1	1	1	1	1	1	1	1	1	1	1	1	1	1	1	1	1	1	1	1	1	1	1	1	1
osmB	osmB	osmotically-inducible lipoprotein OsmB	568	568	1	1	2713	219	219	219	1	1	1	1	1	1	1	1	1	1	1	1	1	1	1	1	1	1	1	1	1	1	1	1	1	1	1	1	1	1	1	1	1	1	1	1	1	1	1
group_878		DUF3820 domain-containing protein	568	568	1	1	2712	219	219	219	1	1	1	1	1	1	1	1	1	1	1	1	1	1	1	1	1	1	1	1	1	1	1	1	1	1	1	1	1	1	1	1	1	1	1	1	1	1	1
group_877		Lipoprotein	568	568	1	1	2711	219	219	219	1	1	1	1	1	1	1	1	1	1	1	1	1	1	1	1	1	1	1	1	1	1	1	1	1	1	1	1	1	1	1	1	1	1	1	1	1	1	1
slyX	slyX	Protein SlyX	568	568	1	1	2710	219	219	219	1	1	1	1	1	1	1	1	1	1	1	1	1	1	1	1	1	1	1	1	1	1	1	1	1	1	1	1	1	1	1	1	1	1	1	1	1	1	1
yheU	yheU	YheU family protein	568	568	1	1	2709	219	219	219	1	1	1	1	1	1	1	1	1	1	1	1	1	1	1	1	1	1	1	1	1	1	1	1	1	1	1	1	1	1	1	1	1	1	1	1	1	1	1
group_874		Inner membrane protein	568	568	1	1	2705	222	222	222	1	1	1	1	1	1	1	1	1	1	1	1	1	1	1	1	1	1	1	1	1	1	1	1	1	1	1	1	1	1	1	1	1	1	1	1	1	1	1
group_872		Zinc ribbon domain-containing protein	568	568	1	1	2703	222	222	222	1	1	1	1	1	1	1	1	1	1	1	1	1	1	1	1	1	1	1	1	1	1	1	1	1	1	1	1	1	1	1	1	1	1	1	1	1	1	1
yhdV	yhdV	putative protein YhdV	568	568	1	1	2702	222	222	222	1	1	1	1	1	1	1	1	1	1	1	1	1	1	1	1	1	1	1	1	1	1	1	1	1	1	1	1	1	1	1	1	1	1	1	1	1	1	1
yefM	yefM	Orphan antitoxin YefM	568	568	1	1	2701	222	222	222	1	1	1	1	1	1	1	1	1	1	1	1	1	1	1	1	1	1	1	1	1	1	1	1	1	1	1	1	1	1	1	1	1	1	1	1	1	1	1
group_868		Transposase	568	568	1	1	2696	225	225	225	1	1	1	1	1	1	1	1	1	1	1	1	1	1	1	1	1	1	1	1	1	1	1	1	1	1	1	1	1	1	1	1	1	1	1	1	1	1	1
group_867		DUF2594 domain-containing protein	568	568	1	1	2694	225	225	225	1	1	1	1	1	1	1	1	1	1	1	1	1	1	1	1	1	1	1	1	1	1	1	1	1	1	1	1	1	1	1	1	1	1	1	1	1	1	1
group_866		Secreted protein	568	568	1	1	2693	225	225	225	1	1	1	1	1	1	1	1	1	1	1	1	1	1	1	1	1	1	1	1	1	1	1	1	1	1	1	1	1	1	1	1	1	1	1	1	1	1	1
rpsR	rpsR	30S ribosomal protein S18	568	568	1	1	2688	228	228	228	1	1	1	1	1	1	1	1	1	1	1	1	1	1	1	1	1	1	1	1	1	1	1	1	1	1	1	1	1	1	1	1	1	1	1	1	1	1	1
group_862	wrbA	NAD(P)H:quinone oxidoreductase	568	568	1	1	2687	228	228	228	1	1	1	1	1	1	1	1	1	1	1	1	1	1	1	1	1	1	1	1	1	1	1	1	1	1	1	1	1	1	1	1	1	1	1	1	1	1	1
group_861	yceK	YceK/YidQ family lipoprotein	568	568	1	1	2686	228	228	228	1	1	1	1	1	1	1	1	1	1	1	1	1	1	1	1	1	1	1	1	1	1	1	1	1	1	1	1	1	1	1	1	1	1	1	1	1	1	1
yodD	yodD	YodD family peroxide/acid resistance protein	568	568	1	1	2685	228	228	228	1	1	1	1	1	1	1	1	1	1	1	1	1	1	1	1	1	1	1	1	1	1	1	1	1	1	1	1	1	1	1	1	1	1	1	1	1	1	1
group_860		Lipoprotein	568	568	1	1	2684	228	228	228	1	1	1	1	1	1	1	1	1	1	1	1	1	1	1	1	1	1	1	1	1	1	1	1	1	1	1	1	1	1	1	1	1	1	1	1	1	1	1
vapB	vapB	toxin-antitoxin system antitoxin VapB	568	568	1	1	2683	228	228	228	1	1	1	1	1	1	1	1	1	1	1	1	1	1	1	1	1	1	1	1	1	1	1	1	1	1	1	1	1	1	1	1	1	1	1	1	1	1	1
group_856		Conserved domain protein	568	568	1	1	2679	231	231	231	1	1	1	1	1	1	1	1	1	1	1	1	1	1	1	1	1	1	1	1	1	1	1	1	1	1	1	1	1	1	1	1	1	1	1	1	1	1	1
chaB	chaB	putative cation transport regulator ChaB	568	568	1	1	2678	231	231	231	1	1	1	1	1	1	1	1	1	1	1	1	1	1	1	1	1	1	1	1	1	1	1	1	1	1	1	1	1	1	1	1	1	1	1	1	1	1	1
group_855		DNA polymerase III subunit theta	568	568	1	1	2677	231	231	231	1	1	1	1	1	1	1	1	1	1	1	1	1	1	1	1	1	1	1	1	1	1	1	1	1	1	1	1	1	1	1	1	1	1	1	1	1	1	1
group_848		Exported protein	568	568	1	1	2670	234	234	234	1	1	1	1	1	1	1	1	1	1	1	1	1	1	1	1	1	1	1	1	1	1	1	1	1	1	1	1	1	1	1	1	1	1	1	1	1	1	1
yedF	yedF	sulfurtransferase-like selenium metabolism protein YedF	568	568	1	1	2666	234	234	234	1	1	1	1	1	1	1	1	1	1	1	1	1	1	1	1	1	1	1	1	1	1	1	1	1	1	1	1	1	1	1	1	1	1	1	1	1	1	1
group_840		DUF1435 domain-containing protein	568	568	1	1	2659	237	237	237	1	1	1	1	1	1	1	1	1	1	1	1	1	1	1	1	1	1	1	1	1	1	1	1	1	1	1	1	1	1	1	1	1	1	1	1	1	1	1
rclB	rclB	reactive chlorine resistance periplasmic protein RclB	568	568	1	1	2658	237	237	237	1	1	1	1	1	1	1	1	1	1	1	1	1	1	1	1	1	1	1	1	1	1	1	1	1	1	1	1	1	1	1	1	1	1	1	1	1	1	1
acpP	acpP	acyl carrier protein	568	568	1	1	2657	237	237	237	1	1	1	1	1	1	1	1	1	1	1	1	1	1	1	1	1	1	1	1	1	1	1	1	1	1	1	1	1	1	1	1	1	1	1	1	1	1	1
group_839		DUF1656 domain-containing protein	568	568	1	1	2656	237	237	237	1	1	1	1	1	1	1	1	1	1	1	1	1	1	1	1	1	1	1	1	1	1	1	1	1	1	1	1	1	1	1	1	1	1	1	1	1	1	1
feoC	feoC	[Fe-S]-dependent transcriptional repressor FeoC	568	568	1	1	2654	237	237	237	1	1	1	1	1	1	1	1	1	1	1	1	1	1	1	1	1	1	1	1	1	1	1	1	1	1	1	1	1	1	1	1	1	1	1	1	1	1	1
rpmB	rpmB	50S ribosomal protein L28	568	568	1	1	2653	237	237	237	1	1	1	1	1	1	1	1	1	1	1	1	1	1	1	1	1	1	1	1	1	1	1	1	1	1	1	1	1	1	1	1	1	1	1	1	1	1	1
atpE	atpE	F0F1 ATP synthase subunit C	568	568	1	1	2651	240	240	240	1	1	1	1	1	1	1	1	1	1	1	1	1	1	1	1	1	1	1	1	1	1	1	1	1	1	1	1	1	1	1	1	1	1	1	1	1	1	1
group_836		Antitoxin protein (Leta protein) (Protein h) (Lyna)	568	568	1	1	2650	240	240	240	1	1	1	1	1	1	1	1	1	1	1	1	1	1	1	1	1	1	1	1	1	1	1	1	1	1	1	1	1	1	1	1	1	1	1	1	1	1	1
msgA	msgA	virulence protein MsgA	568	568	1	1	2647	240	240	240	1	1	1	1	1	1	1	1	1	1	1	1	1	1	1	1	1	1	1	1	1	1	1	1	1	1	1	1	1	1	1	1	1	1	1	1	1	1	1
ydhL	ydhL	DUF1289 domain-containing protein	568	568	1	1	2646	240	240	240	1	1	1	1	1	1	1	1	1	1	1	1	1	1	1	1	1	1	1	1	1	1	1	1	1	1	1	1	1	1	1	1	1	1	1	1	1	1	1
yobH	yobH	putative protein YobH	568	568	1	1	2645	240	240	240	1	1	1	1	1	1	1	1	1	1	1	1	1	1	1	1	1	1	1	1	1	1	1	1	1	1	1	1	1	1	1	1	1	1	1	1	1	1	1
group_832		DUF2492 domain-containing protein	568	568	1	1	2643	240	240	240	1	1	1	1	1	1	1	1	1	1	1	1	1	1	1	1	1	1	1	1	1	1	1	1	1	1	1	1	1	1	1	1	1	1	1	1	1	1	1
group_831		Cytoplasmic protein	568	568	1	1	2642	240	240	240	1	1	1	1	1	1	1	1	1	1	1	1	1	1	1	1	1	1	1	1	1	1	1	1	1	1	1	1	1	1	1	1	1	1	1	1	1	1	1
pspG	pspG	envelope stress response protein PspG	568	568	1	1	2635	243	243	243	1	1	1	1	1	1	1	1	1	1	1	1	1	1	1	1	1	1	1	1	1	1	1	1	1	1	1	1	1	1	1	1	1	1	1	1	1	1	1
relB	relB	type II toxin-antitoxin system RelB/DinJ family antitoxin	568	568	1	1	2634	243	243	243	1	1	1	1	1	1	1	1	1	1	1	1	1	1	1	1	1	1	1	1	1	1	1	1	1	1	1	1	1	1	1	1	1	1	1	1	1	1	1
xseB	xseB	exodeoxyribonuclease VII small subunit	568	568	1	1	2632	243	243	243	1	1	1	1	1	1	1	1	1	1	1	1	1	1	1	1	1	1	1	1	1	1	1	1	1	1	1	1	1	1	1	1	1	1	1	1	1	1	1
group_824		DUF2545 domain-containing protein	568	568	1	1	2629	243	243	243	1	1	1	1	1	1	1	1	1	1	1	1	1	1	1	1	1	1	1	1	1	1	1	1	1	1	1	1	1	1	1	1	1	1	1	1	1	1	1
prgI	prgI	type III secretion system needle filament protein PrgI	568	568	1	1	2628	243	243	243	1	1	1	1	1	1	1	1	1	1	1	1	1	1	1	1	1	1	1	1	1	1	1	1	1	1	1	1	1	1	1	1	1	1	1	1	1	1	1
yhdT	yhdT	putative membrane protein YhdT	568	568	1	1	2627	243	243	243	1	1	1	1	1	1	1	1	1	1	1	1	1	1	1	1	1	1	1	1	1	1	1	1	1	1	1	1	1	1	1	1	1	1	1	1	1	1	1
moaD	moaD	molybdopterin synthase sulfur carrier subunit	568	568	1	1	2623	246	246	246	1	1	1	1	1	1	1	1	1	1	1	1	1	1	1	1	1	1	1	1	1	1	1	1	1	1	1	1	1	1	1	1	1	1	1	1	1	1	1
nrdH	nrdH	glutaredoxin-like protein NrdH	568	568	1	1	2622	246	246	246	1	1	1	1	1	1	1	1	1	1	1	1	1	1	1	1	1	1	1	1	1	1	1	1	1	1	1	1	1	1	1	1	1	1	1	1	1	1	1
group_818		RHH-1 domain-containing protein	568	568	1	1	2619	249	249	249	1	1	1	1	1	1	1	1	1	1	1	1	1	1	1	1	1	1	1	1	1	1	1	1	1	1	1	1	1	1	1	1	1	1	1	1	1	1	1
group_813	yeaQ	putative membrane protein YeaQ/YmgE transglycosylase-associated protein family	568	568	1	1	2614	249	249	249	1	1	1	1	1	1	1	1	1	1	1	1	1	1	1	1	1	1	1	1	1	1	1	1	1	1	1	1	1	1	1	1	1	1	1	1	1	1	1
iacP	iacP	putative acyl carrier protein	568	568	1	1	2612	249	249	249	1	1	1	1	1	1	1	1	1	1	1	1	1	1	1	1	1	1	1	1	1	1	1	1	1	1	1	1	1	1	1	1	1	1	1	1	1	1	1
group_810		Exported protein	568	568	1	1	2609	252	252	252	1	1	1	1	1	1	1	1	1	1	1	1	1	1	1	1	1	1	1	1	1	1	1	1	1	1	1	1	1	1	1	1	1	1	1	1	1	1	1
group_809	hlx	Putative hemolysin	568	568	1	1	2608	252	252	252	1	1	1	1	1	1	1	1	1	1	1	1	1	1	1	1	1	1	1	1	1	1	1	1	1	1	1	1	1	1	1	1	1	1	1	1	1	1	1
group_808		DUF2498 domain-containing protein	568	568	1	1	2607	252	252	252	1	1	1	1	1	1	1	1	1	1	1	1	1	1	1	1	1	1	1	1	1	1	1	1	1	1	1	1	1	1	1	1	1	1	1	1	1	1	1
grxC	grxC	glutaredoxin 3	568	568	1	1	2606	252	252	252	1	1	1	1	1	1	1	1	1	1	1	1	1	1	1	1	1	1	1	1	1	1	1	1	1	1	1	1	1	1	1	1	1	1	1	1	1	1	1
tatA	tatA	Sec-independent protein translocase subunit TatA	568	568	1	1	2604	255	255	255	1	1	1	1	1	1	1	1	1	1	1	1	1	1	1	1	1	1	1	1	1	1	1	1	1	1	1	1	1	1	1	1	1	1	1	1	1	1	1
group_806		DUF2534 domain-containing protein	568	568	1	1	2602	255	255	255	1	1	1	1	1	1	1	1	1	1	1	1	1	1	1	1	1	1	1	1	1	1	1	1	1	1	1	1	1	1	1	1	1	1	1	1	1	1	1
yfaE	yfaE	ferredoxin-like diferric-tyrosyl radical cofactor maintenance protein YfaE	568	568	1	1	2600	255	255	255	1	1	1	1	1	1	1	1	1	1	1	1	1	1	1	1	1	1	1	1	1	1	1	1	1	1	1	1	1	1	1	1	1	1	1	1	1	1	1
rpsQ	rpsQ	30S ribosomal protein S17	568	568	1	1	2599	255	255	255	1	1	1	1	1	1	1	1	1	1	1	1	1	1	1	1	1	1	1	1	1	1	1	1	1	1	1	1	1	1	1	1	1	1	1	1	1	1	1
yjhX	yjhX	UPF0386 protein YjhX	568	568	1	1	2594	258	258	258	1	1	1	1	1	1	1	1	1	1	1	1	1	1	1	1	1	1	1	1	1	1	1	1	1	1	1	1	1	1	1	1	1	1	1	1	1	1	1
group_800		Aryl sulfotransferase	568	568	1	1	2592	258	258	258	1	1	1	1	1	1	1	1	1	1	1	1	1	1	1	1	1	1	1	1	1	1	1	1	1	1	1	1	1	1	1	1	1	1	1	1	1	1	1
pmrD	pmrD	signal transduction protein PmrD	568	568	1	1	2591	258	258	258	1	1	1	1	1	1	1	1	1	1	1	1	1	1	1	1	1	1	1	1	1	1	1	1	1	1	1	1	1	1	1	1	1	1	1	1	1	1	1
ptsH	ptsH	phosphocarrier protein Hpr	568	568	1	1	2590	258	258	258	1	1	1	1	1	1	1	1	1	1	1	1	1	1	1	1	1	1	1	1	1	1	1	1	1	1	1	1	1	1	1	1	1	1	1	1	1	1	1
rpmA	rpmA	50S ribosomal protein L27	568	568	1	1	2589	258	258	258	1	1	1	1	1	1	1	1	1	1	1	1	1	1	1	1	1	1	1	1	1	1	1	1	1	1	1	1	1	1	1	1	1	1	1	1	1	1	1
rof	rof	Rho-binding antiterminator	568	568	1	1	2580	261	261	261	1	1	1	1	1	1	1	1	1	1	1	1	1	1	1	1	1	1	1	1	1	1	1	1	1	1	1	1	1	1	1	1	1	1	1	1	1	1	1
rpmE2	rpmE2	type B 50S ribosomal protein L31	568	568	1	1	2578	261	261	261	1	1	1	1	1	1	1	1	1	1	1	1	1	1	1	1	1	1	1	1	1	1	1	1	1	1	1	1	1	1	1	1	1	1	1	1	1	1	1
ybiJ	ybiJ	DUF1471 domain-containing protein	568	568	1	1	2577	261	261	261	1	1	1	1	1	1	1	1	1	1	1	1	1	1	1	1	1	1	1	1	1	1	1	1	1	1	1	1	1	1	1	1	1	1	1	1	1	1	1
group_791	nuoI	YfhL family 4Fe-4S dicluster ferredoxin	568	568	1	1	2576	261	261	261	1	1	1	1	1	1	1	1	1	1	1	1	1	1	1	1	1	1	1	1	1	1	1	1	1	1	1	1	1	1	1	1	1	1	1	1	1	1	1
group_790		Doubtful CDS found within S typhi pathogenicity island	568	568	1	1	2575	261	261	261	1	1	1	1	1	1	1	1	1	1	1	1	1	1	1	1	1	1	1	1	1	1	1	1	1	1	1	1	1	1	1	1	1	1	1	1	1	1	1
spaQ	spaQ	SPI-1 type III secretion system export apparatus protein SpaQ	568	568	1	1	2574	261	261	261	1	1	1	1	1	1	1	1	1	1	1	1	1	1	1	1	1	1	1	1	1	1	1	1	1	1	1	1	1	1	1	1	1	1	1	1	1	1	1
group_789		Endonuclease	568	568	1	1	2573	261	261	261	1	1	1	1	1	1	1	1	1	1	1	1	1	1	1	1	1	1	1	1	1	1	1	1	1	1	1	1	1	1	1	1	1	1	1	1	1	1	1
ilvM	ilvM	acetolactate synthase 2 small subunit	568	568	1	1	2571	264	264	264	1	1	1	1	1	1	1	1	1	1	1	1	1	1	1	1	1	1	1	1	1	1	1	1	1	1	1	1	1	1	1	1	1	1	1	1	1	1	1
ybeD	ybeD	DUF493 domain-containing protein	568	568	1	1	2570	264	264	264	1	1	1	1	1	1	1	1	1	1	1	1	1	1	1	1	1	1	1	1	1	1	1	1	1	1	1	1	1	1	1	1	1	1	1	1	1	1	1
group_787		Acyl dehydratase	568	568	1	1	2569	264	264	264	1	1	1	1	1	1	1	1	1	1	1	1	1	1	1	1	1	1	1	1	1	1	1	1	1	1	1	1	1	1	1	1	1	1	1	1	1	1	1
grxA	grxA	GrxA family glutaredoxin	568	568	1	1	2568	264	264	264	1	1	1	1	1	1	1	1	1	1	1	1	1	1	1	1	1	1	1	1	1	1	1	1	1	1	1	1	1	1	1	1	1	1	1	1	1	1	1
ssaI	ssaI	SctI family type III secretion system inner rod subunit SsaI	568	568	1	1	2566	264	264	264	1	1	1	1	1	1	1	1	1	1	1	1	1	1	1	1	1	1	1	1	1	1	1	1	1	1	1	1	1	1	1	1	1	1	1	1	1	1	1
group_786	dnaA	chromosomal replication initiator protein DnaA	568	568	1	1	2565	264	264	264	1	1	1	1	1	1	1	1	1	1	1	1	1	1	1	1	1	1	1	1	1	1	1	1	1	1	1	1	1	1	1	1	1	1	1	1	1	1	1
group_785	yhcN	peroxide/acid stress response protein YhcN	568	568	1	1	2564	264	264	264	1	1	1	1	1	1	1	1	1	1	1	1	1	1	1	1	1	1	1	1	1	1	1	1	1	1	1	1	1	1	1	1	1	1	1	1	1	1	1
group_784		ATP-binding protein	568	568	1	1	2563	264	264	264	1	1	1	1	1	1	1	1	1	1	1	1	1	1	1	1	1	1	1	1	1	1	1	1	1	1	1	1	1	1	1	1	1	1	1	1	1	1	1
group_779		Cytoplasmic protein	568	568	1	1	2558	267	267	267	1	1	1	1	1	1	1	1	1	1	1	1	1	1	1	1	1	1	1	1	1	1	1	1	1	1	1	1	1	1	1	1	1	1	1	1	1	1	1
group_778	dksA	DksA/TraR family C4-type zinc finger protein	568	568	1	1	2557	267	267	267	1	1	1	1	1	1	1	1	1	1	1	1	1	1	1	1	1	1	1	1	1	1	1	1	1	1	1	1	1	1	1	1	1	1	1	1	1	1	1
minE	minE	cell division topological specificity factor MinE	568	568	1	1	2555	267	267	267	1	1	1	1	1	1	1	1	1	1	1	1	1	1	1	1	1	1	1	1	1	1	1	1	1	1	1	1	1	1	1	1	1	1	1	1	1	1	1
sdhE	sdhE	FAD assembly factor SdhE	568	568	1	1	2554	267	267	267	1	1	1	1	1	1	1	1	1	1	1	1	1	1	1	1	1	1	1	1	1	1	1	1	1	1	1	1	1	1	1	1	1	1	1	1	1	1	1
yhcN	yhcN	peroxide/acid stress response protein YhcN	568	568	1	1	2553	267	267	267	1	1	1	1	1	1	1	1	1	1	1	1	1	1	1	1	1	1	1	1	1	1	1	1	1	1	1	1	1	1	1	1	1	1	1	1	1	1	1
fliQ	fliQ	flagellar biosynthesis protein FliQ	568	568	1	1	2550	270	270	270	1	1	1	1	1	1	1	1	1	1	1	1	1	1	1	1	1	1	1	1	1	1	1	1	1	1	1	1	1	1	1	1	1	1	1	1	1	1	1
rpsO	rpsO	30S ribosomal protein S15	568	568	1	1	2549	270	270	270	1	1	1	1	1	1	1	1	1	1	1	1	1	1	1	1	1	1	1	1	1	1	1	1	1	1	1	1	1	1	1	1	1	1	1	1	1	1	1
arfA	arfA	Stalled ribosome alternative rescue factor ArfA	568	568	1	1	2548	270	270	270	1	1	1	1	1	1	1	1	1	1	1	1	1	1	1	1	1	1	1	1	1	1	1	1	1	1	1	1	1	1	1	1	1	1	1	1	1	1	1
yhhL	yhhL	DUF1145 domain-containing protein	568	568	1	1	2547	270	270	270	1	1	1	1	1	1	1	1	1	1	1	1	1	1	1	1	1	1	1	1	1	1	1	1	1	1	1	1	1	1	1	1	1	1	1	1	1	1	1
group_771		DUF3811 domain-containing protein	568	568	1	1	2542	273	273	273	1	1	1	1	1	1	1	1	1	1	1	1	1	1	1	1	1	1	1	1	1	1	1	1	1	1	1	1	1	1	1	1	1	1	1	1	1	1	1
group_769	sgaB	Phosphotransferase system galactitol-specific IIB component	568	568	1	1	2540	273	273	273	1	1	1	1	1	1	1	1	1	1	1	1	1	1	1	1	1	1	1	1	1	1	1	1	1	1	1	1	1	1	1	1	1	1	1	1	1	1	1
rcnR	rcnR	Ni(II)/Co(II)-binding transcriptional repressor RcnR	568	568	1	1	2538	273	273	273	1	1	1	1	1	1	1	1	1	1	1	1	1	1	1	1	1	1	1	1	1	1	1	1	1	1	1	1	1	1	1	1	1	1	1	1	1	1	1
npr	npr	PTS phosphocarrier protein NPr	568	568	1	1	2537	273	273	273	1	1	1	1	1	1	1	1	1	1	1	1	1	1	1	1	1	1	1	1	1	1	1	1	1	1	1	1	1	1	1	1	1	1	1	1	1	1	1
barS	barS	Barstar RNAse (barnase) inhibitor	568	568	1	1	2536	273	273	273	1	1	1	1	1	1	1	1	1	1	1	1	1	1	1	1	1	1	1	1	1	1	1	1	1	1	1	1	1	1	1	1	1	1	1	1	1	1	1
group_768		Antitoxin	568	568	1	1	2535	273	273	273	1	1	1	1	1	1	1	1	1	1	1	1	1	1	1	1	1	1	1	1	1	1	1	1	1	1	1	1	1	1	1	1	1	1	1	1	1	1	1
group_764		YdgH-BhsA-like domain-containing protein	568	568	1	1	2531	276	276	276	1	1	1	1	1	1	1	1	1	1	1	1	1	1	1	1	1	1	1	1	1	1	1	1	1	1	1	1	1	1	1	1	1	1	1	1	1	1	1
group_763		YdgH-BhsA-like domain-containing protein	568	568	1	1	2530	276	276	276	1	1	1	1	1	1	1	1	1	1	1	1	1	1	1	1	1	1	1	1	1	1	1	1	1	1	1	1	1	1	1	1	1	1	1	1	1	1	1
group_762		Arm DNA-binding domain-containing protein	568	568	1	1	2529	276	276	276	1	1	1	1	1	1	1	1	1	1	1	1	1	1	1	1	1	1	1	1	1	1	1	1	1	1	1	1	1	1	1	1	1	1	1	1	1	1	1
yahO	yahO	DUF1471 domain-containing protein	568	568	1	1	2528	276	276	276	1	1	1	1	1	1	1	1	1	1	1	1	1	1	1	1	1	1	1	1	1	1	1	1	1	1	1	1	1	1	1	1	1	1	1	1	1	1	1
ynjH	ynjH	YnjH family protein	568	568	1	1	2527	276	276	276	1	1	1	1	1	1	1	1	1	1	1	1	1	1	1	1	1	1	1	1	1	1	1	1	1	1	1	1	1	1	1	1	1	1	1	1	1	1	1
yfcL	yfcL	YfcL family protein	568	568	1	1	2524	276	276	276	1	1	1	1	1	1	1	1	1	1	1	1	1	1	1	1	1	1	1	1	1	1	1	1	1	1	1	1	1	1	1	1	1	1	1	1	1	1	1
group_761		hypothetical protein	568	568	1	1	2523	276	276	276	1	1	1	1	1	1	1	1	1	1	1	1	1	1	1	1	1	1	1	1	1	1	1	1	1	1	1	1	1	1	1	1	1	1	1	1	1	1	1
rpoZ	rpoZ	DNA-directed RNA polymerase subunit omega	568	568	1	1	2522	276	276	276	1	1	1	1	1	1	1	1	1	1	1	1	1	1	1	1	1	1	1	1	1	1	1	1	1	1	1	1	1	1	1	1	1	1	1	1	1	1	1
rpsS	rpsS	30S ribosomal protein S19	568	568	1	1	2520	279	279	279	1	1	1	1	1	1	1	1	1	1	1	1	1	1	1	1	1	1	1	1	1	1	1	1	1	1	1	1	1	1	1	1	1	1	1	1	1	1	1
ppiC	ppiC	peptidylprolyl isomerase PpiC	568	568	1	1	2519	282	282	282	1	1	1	1	1	1	1	1	1	1	1	1	1	1	1	1	1	1	1	1	1	1	1	1	1	1	1	1	1	1	1	1	1	1	1	1	1	1	1
yjcB	yjcB	YjcB family protein	568	568	1	1	2518	282	282	282	1	1	1	1	1	1	1	1	1	1	1	1	1	1	1	1	1	1	1	1	1	1	1	1	1	1	1	1	1	1	1	1	1	1	1	1	1	1	1
ybgE	ybgE	cyd operon protein YbgE	568	568	1	1	2515	282	282	282	1	1	1	1	1	1	1	1	1	1	1	1	1	1	1	1	1	1	1	1	1	1	1	1	1	1	1	1	1	1	1	1	1	1	1	1	1	1	1
yccX	yccX	acylphosphatase	568	568	1	1	2514	282	282	282	1	1	1	1	1	1	1	1	1	1	1	1	1	1	1	1	1	1	1	1	1	1	1	1	1	1	1	1	1	1	1	1	1	1	1	1	1	1	1
group_757	sgaB	Phosphotransferase system galactitol-specific IIB component	568	568	1	1	2513	282	282	282	1	1	1	1	1	1	1	1	1	1	1	1	1	1	1	1	1	1	1	1	1	1	1	1	1	1	1	1	1	1	1	1	1	1	1	1	1	1	1
cbiN	cbiN	energy-coupling factor ABC transporter substrate-binding protein	568	568	1	1	2512	282	282	282	1	1	1	1	1	1	1	1	1	1	1	1	1	1	1	1	1	1	1	1	1	1	1	1	1	1	1	1	1	1	1	1	1	1	1	1	1	1	1
group_753		Secreted protein	568	568	1	1	2507	285	285	285	1	1	1	1	1	1	1	1	1	1	1	1	1	1	1	1	1	1	1	1	1	1	1	1	1	1	1	1	1	1	1	1	1	1	1	1	1	1	1
ihfB	ihfB	integration host factor subunit beta	568	568	1	1	2504	285	285	285	1	1	1	1	1	1	1	1	1	1	1	1	1	1	1	1	1	1	1	1	1	1	1	1	1	1	1	1	1	1	1	1	1	1	1	1	1	1	1
yfcZ	yfcZ	DUF406 domain-containing protein	568	568	1	1	2503	285	285	285	1	1	1	1	1	1	1	1	1	1	1	1	1	1	1	1	1	1	1	1	1	1	1	1	1	1	1	1	1	1	1	1	1	1	1	1	1	1	1
gatB	gatB	PTS galactitol transporter subunit IIB	568	568	1	1	2502	285	285	285	1	1	1	1	1	1	1	1	1	1	1	1	1	1	1	1	1	1	1	1	1	1	1	1	1	1	1	1	1	1	1	1	1	1	1	1	1	1	1
group_747		DUF497 domain-containing protein	568	568	1	1	2497	288	288	288	1	1	1	1	1	1	1	1	1	1	1	1	1	1	1	1	1	1	1	1	1	1	1	1	1	1	1	1	1	1	1	1	1	1	1	1	1	1	1
group_744	fixX	ferredoxin-like protein FixX	568	568	1	1	2494	288	288	288	1	1	1	1	1	1	1	1	1	1	1	1	1	1	1	1	1	1	1	1	1	1	1	1	1	1	1	1	1	1	1	1	1	1	1	1	1	1	1
eutN	eutN	ethanolamine utilization microcompartment protein EutN	568	568	1	1	2493	288	288	288	1	1	1	1	1	1	1	1	1	1	1	1	1	1	1	1	1	1	1	1	1	1	1	1	1	1	1	1	1	1	1	1	1	1	1	1	1	1	1
group_743		DUF2623 domain-containing protein	568	568	1	1	2492	288	288	288	1	1	1	1	1	1	1	1	1	1	1	1	1	1	1	1	1	1	1	1	1	1	1	1	1	1	1	1	1	1	1	1	1	1	1	1	1	1	1
sfsB	sfsB	DNA-binding transcriptional regulator SfsB	568	568	1	1	2491	288	288	288	1	1	1	1	1	1	1	1	1	1	1	1	1	1	1	1	1	1	1	1	1	1	1	1	1	1	1	1	1	1	1	1	1	1	1	1	1	1	1
tusB	tusB	sulfurtransferase complex subunit TusB	568	568	1	1	2489	288	288	288	1	1	1	1	1	1	1	1	1	1	1	1	1	1	1	1	1	1	1	1	1	1	1	1	1	1	1	1	1	1	1	1	1	1	1	1	1	1	1
sgaB	sgaB	Phosphotransferase system galactitol-specific IIB component	568	568	1	1	2488	288	288	288	1	1	1	1	1	1	1	1	1	1	1	1	1	1	1	1	1	1	1	1	1	1	1	1	1	1	1	1	1	1	1	1	1	1	1	1	1	1	1
group_740		YdgH-BhsA-like domain-containing protein	568	568	1	1	2485	291	291	291	1	1	1	1	1	1	1	1	1	1	1	1	1	1	1	1	1	1	1	1	1	1	1	1	1	1	1	1	1	1	1	1	1	1	1	1	1	1	1
group_739		DUF1418 domain-containing protein	568	568	1	1	2483	291	291	291	1	1	1	1	1	1	1	1	1	1	1	1	1	1	1	1	1	1	1	1	1	1	1	1	1	1	1	1	1	1	1	1	1	1	1	1	1	1	1
group_738		EscG/YscG/SsaH family type III secretion system needle protein co-chaperone	568	568	1	1	2482	291	291	291	1	1	1	1	1	1	1	1	1	1	1	1	1	1	1	1	1	1	1	1	1	1	1	1	1	1	1	1	1	1	1	1	1	1	1	1	1	1	1
yebG	yebG	DNA damage-inducible protein YebG	568	568	1	1	2481	291	291	291	1	1	1	1	1	1	1	1	1	1	1	1	1	1	1	1	1	1	1	1	1	1	1	1	1	1	1	1	1	1	1	1	1	1	1	1	1	1	1
yfjF	yfjF	RnfH family protein	568	568	1	1	2480	291	291	291	1	1	1	1	1	1	1	1	1	1	1	1	1	1	1	1	1	1	1	1	1	1	1	1	1	1	1	1	1	1	1	1	1	1	1	1	1	1	1
groES	groES	Co-chaperonin GroES	568	568	1	1	2476	294	294	294	1	1	1	1	1	1	1	1	1	1	1	1	1	1	1	1	1	1	1	1	1	1	1	1	1	1	1	1	1	1	1	1	1	1	1	1	1	1	1
ybfE	ybfE	LexA regulated protein	568	568	1	1	2474	294	294	294	1	1	1	1	1	1	1	1	1	1	1	1	1	1	1	1	1	1	1	1	1	1	1	1	1	1	1	1	1	1	1	1	1	1	1	1	1	1	1
flgM	flgM	flagellar biosynthesis anti-sigma factor FlgM	568	568	1	1	2473	294	294	294	1	1	1	1	1	1	1	1	1	1	1	1	1	1	1	1	1	1	1	1	1	1	1	1	1	1	1	1	1	1	1	1	1	1	1	1	1	1	1
ycgL	ycgL	Protein YcgL	568	568	1	1	2471	294	294	294	1	1	1	1	1	1	1	1	1	1	1	1	1	1	1	1	1	1	1	1	1	1	1	1	1	1	1	1	1	1	1	1	1	1	1	1	1	1	1
eutM	eutM	ethanolamine utilization microcompartment protein EutM	568	568	1	1	2470	294	294	294	1	1	1	1	1	1	1	1	1	1	1	1	1	1	1	1	1	1	1	1	1	1	1	1	1	1	1	1	1	1	1	1	1	1	1	1	1	1	1
ibaG	ibaG	BolA family iron metabolism protein IbaG	568	568	1	1	2469	294	294	294	1	1	1	1	1	1	1	1	1	1	1	1	1	1	1	1	1	1	1	1	1	1	1	1	1	1	1	1	1	1	1	1	1	1	1	1	1	1	1
yicS	yicS	putative protein YicS	568	568	1	1	2468	294	294	294	1	1	1	1	1	1	1	1	1	1	1	1	1	1	1	1	1	1	1	1	1	1	1	1	1	1	1	1	1	1	1	1	1	1	1	1	1	1	1
yciI	yciI	YciI family protein	568	568	1	1	2465	297	297	297	1	1	1	1	1	1	1	1	1	1	1	1	1	1	1	1	1	1	1	1	1	1	1	1	1	1	1	1	1	1	1	1	1	1	1	1	1	1	1
mlaB	mlaB	lipid asymmetry maintenance protein MlaB	568	568	1	1	2464	297	297	297	1	1	1	1	1	1	1	1	1	1	1	1	1	1	1	1	1	1	1	1	1	1	1	1	1	1	1	1	1	1	1	1	1	1	1	1	1	1	1
fis	fis	DNA-binding transcriptional regulator Fis	568	568	1	1	2463	297	297	297	1	1	1	1	1	1	1	1	1	1	1	1	1	1	1	1	1	1	1	1	1	1	1	1	1	1	1	1	1	1	1	1	1	1	1	1	1	1	1
group_728		Integration host factor subunit alpha	568	568	1	1	2457	300	300	300	1	1	1	1	1	1	1	1	1	1	1	1	1	1	1	1	1	1	1	1	1	1	1	1	1	1	1	1	1	1	1	1	1	1	1	1	1	1	1
arsR	arsR	DNA-binding transcriptional regulator ArsR family	568	568	1	1	2455	300	300	300	1	1	1	1	1	1	1	1	1	1	1	1	1	1	1	1	1	1	1	1	1	1	1	1	1	1	1	1	1	1	1	1	1	1	1	1	1	1	1
bsmA	bsmA	biofilm peroxide resistance protein BsmA	568	568	1	1	2452	303	303	303	1	1	1	1	1	1	1	1	1	1	1	1	1	1	1	1	1	1	1	1	1	1	1	1	1	1	1	1	1	1	1	1	1	1	1	1	1	1	1
group_725		DUF4312 domain-containing protein	568	568	1	1	2451	303	303	303	1	1	1	1	1	1	1	1	1	1	1	1	1	1	1	1	1	1	1	1	1	1	1	1	1	1	1	1	1	1	1	1	1	1	1	1	1	1	1
group_724		DUF4415 domain-containing protein	568	568	1	1	2450	303	303	303	1	1	1	1	1	1	1	1	1	1	1	1	1	1	1	1	1	1	1	1	1	1	1	1	1	1	1	1	1	1	1	1	1	1	1	1	1	1	1
group_722		HTH cro/C1-type domain-containing protein	568	568	1	1	2448	303	303	303	1	1	1	1	1	1	1	1	1	1	1	1	1	1	1	1	1	1	1	1	1	1	1	1	1	1	1	1	1	1	1	1	1	1	1	1	1	1	1
rplW	rplW	50S ribosomal protein L23	568	568	1	1	2447	303	303	303	1	1	1	1	1	1	1	1	1	1	1	1	1	1	1	1	1	1	1	1	1	1	1	1	1	1	1	1	1	1	1	1	1	1	1	1	1	1	1
ysaB	ysaB	putative lipoprotein YsaB	568	568	1	1	2446	303	303	303	1	1	1	1	1	1	1	1	1	1	1	1	1	1	1	1	1	1	1	1	1	1	1	1	1	1	1	1	1	1	1	1	1	1	1	1	1	1	1
ulaB	ulaB	PTS ascorbate transporter subunit IIB	568	568	1	1	2445	306	306	306	1	1	1	1	1	1	1	1	1	1	1	1	1	1	1	1	1	1	1	1	1	1	1	1	1	1	1	1	1	1	1	1	1	1	1	1	1	1	1
cbpM	cbpM	chaperone modulator CbpM	568	568	1	1	2444	306	306	306	1	1	1	1	1	1	1	1	1	1	1	1	1	1	1	1	1	1	1	1	1	1	1	1	1	1	1	1	1	1	1	1	1	1	1	1	1	1	1
group_721	elaB	stress response protein ElaB	568	568	1	1	2443	306	306	306	1	1	1	1	1	1	1	1	1	1	1	1	1	1	1	1	1	1	1	1	1	1	1	1	1	1	1	1	1	1	1	1	1	1	1	1	1	1	1
prgJ	prgJ	type III secretion system inner rod protein PrgJ	568	568	1	1	2442	306	306	306	1	1	1	1	1	1	1	1	1	1	1	1	1	1	1	1	1	1	1	1	1	1	1	1	1	1	1	1	1	1	1	1	1	1	1	1	1	1	1
group_720	elaB	DUF883 domain-containing protein	568	568	1	1	2441	306	306	306	1	1	1	1	1	1	1	1	1	1	1	1	1	1	1	1	1	1	1	1	1	1	1	1	1	1	1	1	1	1	1	1	1	1	1	1	1	1	1
rpsN	rpsN	30S ribosomal protein S14	568	568	1	1	2440	306	306	306	1	1	1	1	1	1	1	1	1	1	1	1	1	1	1	1	1	1	1	1	1	1	1	1	1	1	1	1	1	1	1	1	1	1	1	1	1	1	1
ccdB	ccdB	Toxin CcdB	568	568	1	1	2438	309	309	309	1	1	1	1	1	1	1	1	1	1	1	1	1	1	1	1	1	1	1	1	1	1	1	1	1	1	1	1	1	1	1	1	1	1	1	1	1	1	1
lapA	lapA	Lipopolysaccharide assembly protein A	568	568	1	1	2437	309	309	309	1	1	1	1	1	1	1	1	1	1	1	1	1	1	1	1	1	1	1	1	1	1	1	1	1	1	1	1	1	1	1	1	1	1	1	1	1	1	1
atl1	atl1	Alkylated DNA nucleotide flippase Atl1 participates in nucleotide excision repair Ada-like DNA-binding domain	568	568	1	1	2432	312	312	312	1	1	1	1	1	1	1	1	1	1	1	1	1	1	1	1	1	1	1	1	1	1	1	1	1	1	1	1	1	1	1	1	1	1	1	1	1	1	1
group_714		Periplasmic protein	568	568	1	1	2431	312	312	312	1	1	1	1	1	1	1	1	1	1	1	1	1	1	1	1	1	1	1	1	1	1	1	1	1	1	1	1	1	1	1	1	1	1	1	1	1	1	1
group_713		Inner membrane protein	568	568	1	1	2430	312	312	312	1	1	1	1	1	1	1	1	1	1	1	1	1	1	1	1	1	1	1	1	1	1	1	1	1	1	1	1	1	1	1	1	1	1	1	1	1	1	1
ftsB	ftsB	cell division protein FtsB	568	568	1	1	2429	312	312	312	1	1	1	1	1	1	1	1	1	1	1	1	1	1	1	1	1	1	1	1	1	1	1	1	1	1	1	1	1	1	1	1	1	1	1	1	1	1	1
yqfB	yqfB	N(4)-acetylcytidine aminohydrolase	568	568	1	1	2428	312	312	312	1	1	1	1	1	1	1	1	1	1	1	1	1	1	1	1	1	1	1	1	1	1	1	1	1	1	1	1	1	1	1	1	1	1	1	1	1	1	1
rplU	rplU	50S ribosomal protein L21	568	568	1	1	2427	312	312	312	1	1	1	1	1	1	1	1	1	1	1	1	1	1	1	1	1	1	1	1	1	1	1	1	1	1	1	1	1	1	1	1	1	1	1	1	1	1	1
rpsJ_V57L	rpsJ_V57L	30S ribosomal protein S10	568	568	1	1	2426	312	312	312	1	1	1	1	1	1	1	1	1	1	1	1	1	1	1	1	1	1	1	1	1	1	1	1	1	1	1	1	1	1	1	1	1	1	1	1	1	1	1
group_712		monooxygenase	568	568	1	1	2425	312	312	312	1	1	1	1	1	1	1	1	1	1	1	1	1	1	1	1	1	1	1	1	1	1	1	1	1	1	1	1	1	1	1	1	1	1	1	1	1	1	1
group_709		DUF2645 domain-containing protein	568	568	1	1	2422	315	315	315	1	1	1	1	1	1	1	1	1	1	1	1	1	1	1	1	1	1	1	1	1	1	1	1	1	1	1	1	1	1	1	1	1	1	1	1	1	1	1
priB	priB	primosomal replication protein N	568	568	1	1	2421	315	315	315	1	1	1	1	1	1	1	1	1	1	1	1	1	1	1	1	1	1	1	1	1	1	1	1	1	1	1	1	1	1	1	1	1	1	1	1	1	1	1
group_708		ZP domain-containing protein	568	568	1	1	2420	315	315	315	1	1	1	1	1	1	1	1	1	1	1	1	1	1	1	1	1	1	1	1	1	1	1	1	1	1	1	1	1	1	1	1	1	1	1	1	1	1	1
bolA	bolA	transcriptional regulator BolA	568	568	1	1	2418	315	315	315	1	1	1	1	1	1	1	1	1	1	1	1	1	1	1	1	1	1	1	1	1	1	1	1	1	1	1	1	1	1	1	1	1	1	1	1	1	1	1
group_706		Lipoprotein	568	568	1	1	2417	315	315	315	1	1	1	1	1	1	1	1	1	1	1	1	1	1	1	1	1	1	1	1	1	1	1	1	1	1	1	1	1	1	1	1	1	1	1	1	1	1	1
fliE	fliE	flagellar hook-basal body complex protein FliE	568	568	1	1	2415	315	315	315	1	1	1	1	1	1	1	1	1	1	1	1	1	1	1	1	1	1	1	1	1	1	1	1	1	1	1	1	1	1	1	1	1	1	1	1	1	1	1
rcnB	rcnB	Ni(II)/Co(II) efflux transporter accessory subunit RcnB	568	568	1	1	2414	315	315	315	1	1	1	1	1	1	1	1	1	1	1	1	1	1	1	1	1	1	1	1	1	1	1	1	1	1	1	1	1	1	1	1	1	1	1	1	1	1	1
ygiN	ygiN	putative quinol monooxygenase YgiN	568	568	1	1	2413	315	315	315	1	1	1	1	1	1	1	1	1	1	1	1	1	1	1	1	1	1	1	1	1	1	1	1	1	1	1	1	1	1	1	1	1	1	1	1	1	1	1
rplX	rplX	50S ribosomal protein L24	568	568	1	1	2412	315	315	315	1	1	1	1	1	1	1	1	1	1	1	1	1	1	1	1	1	1	1	1	1	1	1	1	1	1	1	1	1	1	1	1	1	1	1	1	1	1	1
group_704		Phage-related protein	568	568	1	1	2410	318	318	318	1	1	1	1	1	1	1	1	1	1	1	1	1	1	1	1	1	1	1	1	1	1	1	1	1	1	1	1	1	1	1	1	1	1	1	1	1	1	1
sugE	sugE	quaternary ammonium compound efflux SMR transporter SugE	568	568	1	1	2409	318	318	318	1	1	1	1	1	1	1	1	1	1	1	1	1	1	1	1	1	1	1	1	1	1	1	1	1	1	1	1	1	1	1	1	1	1	1	1	1	1	1
rsfS	rsfS	ribosome silencing factor	568	568	1	1	2408	318	318	318	1	1	1	1	1	1	1	1	1	1	1	1	1	1	1	1	1	1	1	1	1	1	1	1	1	1	1	1	1	1	1	1	1	1	1	1	1	1	1
hspQ	hspQ	heat shock protein HspQ	568	568	1	1	2407	318	318	318	1	1	1	1	1	1	1	1	1	1	1	1	1	1	1	1	1	1	1	1	1	1	1	1	1	1	1	1	1	1	1	1	1	1	1	1	1	1	1
cyaY	cyaY	iron donor protein CyaY	568	568	1	1	2405	321	321	321	1	1	1	1	1	1	1	1	1	1	1	1	1	1	1	1	1	1	1	1	1	1	1	1	1	1	1	1	1	1	1	1	1	1	1	1	1	1	1
psiF	psiF	phosphate starvation-inducible protein PsiF	568	568	1	1	2403	321	321	321	1	1	1	1	1	1	1	1	1	1	1	1	1	1	1	1	1	1	1	1	1	1	1	1	1	1	1	1	1	1	1	1	1	1	1	1	1	1	1
group_702		DUF1493 domain-containing protein	568	568	1	1	2401	321	321	321	1	1	1	1	1	1	1	1	1	1	1	1	1	1	1	1	1	1	1	1	1	1	1	1	1	1	1	1	1	1	1	1	1	1	1	1	1	1	1
soxS	soxS	regulatory protein SoxS	568	568	1	1	2396	324	324	324	1	1	1	1	1	1	1	1	1	1	1	1	1	1	1	1	1	1	1	1	1	1	1	1	1	1	1	1	1	1	1	1	1	1	1	1	1	1	1
group_697		protein-tyrosine-phosphatase	568	568	1	1	2395	324	324	324	1	1	1	1	1	1	1	1	1	1	1	1	1	1	1	1	1	1	1	1	1	1	1	1	1	1	1	1	1	1	1	1	1	1	1	1	1	1	1
ybjQ	ybjQ	UPF0145 protein Ent638_1382	568	568	1	1	2394	324	324	324	1	1	1	1	1	1	1	1	1	1	1	1	1	1	1	1	1	1	1	1	1	1	1	1	1	1	1	1	1	1	1	1	1	1	1	1	1	1	1
ydbL	ydbL	DUF1318 domain-containing protein	568	568	1	1	2392	324	324	324	1	1	1	1	1	1	1	1	1	1	1	1	1	1	1	1	1	1	1	1	1	1	1	1	1	1	1	1	1	1	1	1	1	1	1	1	1	1	1
iscA	iscA	iron-sulfur cluster assembly protein IscA	568	568	1	1	2391	324	324	324	1	1	1	1	1	1	1	1	1	1	1	1	1	1	1	1	1	1	1	1	1	1	1	1	1	1	1	1	1	1	1	1	1	1	1	1	1	1	1
yfiM	yfiM	YfiM family lipoprotein	568	568	1	1	2390	324	324	324	1	1	1	1	1	1	1	1	1	1	1	1	1	1	1	1	1	1	1	1	1	1	1	1	1	1	1	1	1	1	1	1	1	1	1	1	1	1	1
yiaG	yiaG	DNA-binding transcriptional regulator YiaG XRE-type HTH domain	568	568	1	1	2388	324	324	324	1	1	1	1	1	1	1	1	1	1	1	1	1	1	1	1	1	1	1	1	1	1	1	1	1	1	1	1	1	1	1	1	1	1	1	1	1	1	1
trpR	trpR	trp operon repressor	568	568	1	1	2386	327	327	327	1	1	1	1	1	1	1	1	1	1	1	1	1	1	1	1	1	1	1	1	1	1	1	1	1	1	1	1	1	1	1	1	1	1	1	1	1	1	1
yciH	yciH	stress response translation initiation inhibitor YciH	568	568	1	1	2383	327	327	327	1	1	1	1	1	1	1	1	1	1	1	1	1	1	1	1	1	1	1	1	1	1	1	1	1	1	1	1	1	1	1	1	1	1	1	1	1	1	1
nirD	nirD	nitrite reductase small subunit NirD	568	568	1	1	2380	327	327	327	1	1	1	1	1	1	1	1	1	1	1	1	1	1	1	1	1	1	1	1	1	1	1	1	1	1	1	1	1	1	1	1	1	1	1	1	1	1	1
glpE	glpE	thiosulfate sulfurtransferase GlpE	568	568	1	1	2379	327	327	327	1	1	1	1	1	1	1	1	1	1	1	1	1	1	1	1	1	1	1	1	1	1	1	1	1	1	1	1	1	1	1	1	1	1	1	1	1	1	1
group_690	trxA	thioredoxin TrxA	568	568	1	1	2377	330	330	330	1	1	1	1	1	1	1	1	1	1	1	1	1	1	1	1	1	1	1	1	1	1	1	1	1	1	1	1	1	1	1	1	1	1	1	1	1	1	1
group_689		PRD domain-containing protein	568	568	1	1	2376	330	330	330	1	1	1	1	1	1	1	1	1	1	1	1	1	1	1	1	1	1	1	1	1	1	1	1	1	1	1	1	1	1	1	1	1	1	1	1	1	1	1
cyoD	cyoD	cytochrome o ubiquinol oxidase subunit IV	568	568	1	1	2375	330	330	330	1	1	1	1	1	1	1	1	1	1	1	1	1	1	1	1	1	1	1	1	1	1	1	1	1	1	1	1	1	1	1	1	1	1	1	1	1	1	1
ybaB	ybaB	YbaB/EbfC family nucleoid-associated protein	568	568	1	1	2374	330	330	330	1	1	1	1	1	1	1	1	1	1	1	1	1	1	1	1	1	1	1	1	1	1	1	1	1	1	1	1	1	1	1	1	1	1	1	1	1	1	1
tusE	tusE	sulfurtransferase TusE	568	568	1	1	2373	330	330	330	1	1	1	1	1	1	1	1	1	1	1	1	1	1	1	1	1	1	1	1	1	1	1	1	1	1	1	1	1	1	1	1	1	1	1	1	1	1	1
mdtI	mdtI	multidrug/spermidine efflux SMR transporter subunit MdtI	568	568	1	1	2372	330	330	330	1	1	1	1	1	1	1	1	1	1	1	1	1	1	1	1	1	1	1	1	1	1	1	1	1	1	1	1	1	1	1	1	1	1	1	1	1	1	1
hdeB	hdeB	acid-activated periplasmic chaperone HdeB	568	568	1	1	2371	330	330	330	1	1	1	1	1	1	1	1	1	1	1	1	1	1	1	1	1	1	1	1	1	1	1	1	1	1	1	1	1	1	1	1	1	1	1	1	1	1	1
yciU	yciU	HI1450 family dsDNA-mimic protein	568	568	1	1	2370	330	330	330	1	1	1	1	1	1	1	1	1	1	1	1	1	1	1	1	1	1	1	1	1	1	1	1	1	1	1	1	1	1	1	1	1	1	1	1	1	1	1
ypfK	ypfK	putative protein YpfK	568	568	1	1	2369	330	330	330	1	1	1	1	1	1	1	1	1	1	1	1	1	1	1	1	1	1	1	1	1	1	1	1	1	1	1	1	1	1	1	1	1	1	1	1	1	1	1
zapA	zapA	cell division protein ZapA	568	568	1	1	2368	330	330	330	1	1	1	1	1	1	1	1	1	1	1	1	1	1	1	1	1	1	1	1	1	1	1	1	1	1	1	1	1	1	1	1	1	1	1	1	1	1	1
group_688		Biotin-lipoyl-2 domain-containing protein	568	568	1	1	2367	330	330	330	1	1	1	1	1	1	1	1	1	1	1	1	1	1	1	1	1	1	1	1	1	1	1	1	1	1	1	1	1	1	1	1	1	1	1	1	1	1	1
yajC	yajC	preprotein translocase subunit YajC	568	568	1	1	2362	333	333	333	1	1	1	1	1	1	1	1	1	1	1	1	1	1	1	1	1	1	1	1	1	1	1	1	1	1	1	1	1	1	1	1	1	1	1	1	1	1	1
chiQ	chiQ	putative lipoprotein ChiQ	568	568	1	1	2361	333	333	333	1	1	1	1	1	1	1	1	1	1	1	1	1	1	1	1	1	1	1	1	1	1	1	1	1	1	1	1	1	1	1	1	1	1	1	1	1	1	1
secG	secG	preprotein translocase subunit SecG	568	568	1	1	2360	333	333	333	1	1	1	1	1	1	1	1	1	1	1	1	1	1	1	1	1	1	1	1	1	1	1	1	1	1	1	1	1	1	1	1	1	1	1	1	1	1	1
yhbY	yhbY	ribosome assembly RNA-binding protein YhbY	568	568	1	1	2359	333	333	333	1	1	1	1	1	1	1	1	1	1	1	1	1	1	1	1	1	1	1	1	1	1	1	1	1	1	1	1	1	1	1	1	1	1	1	1	1	1	1
rplV	rplV	50S ribosomal protein L22	568	568	1	1	2358	333	333	333	1	1	1	1	1	1	1	1	1	1	1	1	1	1	1	1	1	1	1	1	1	1	1	1	1	1	1	1	1	1	1	1	1	1	1	1	1	1	1
group_683		HTH-type transcriptional regulator	568	568	1	1	2357	333	333	333	1	1	1	1	1	1	1	1	1	1	1	1	1	1	1	1	1	1	1	1	1	1	1	1	1	1	1	1	1	1	1	1	1	1	1	1	1	1	1
phnA	phnA	putative Zn-ribbon-containing protein	568	568	1	1	2355	336	336	336	1	1	1	1	1	1	1	1	1	1	1	1	1	1	1	1	1	1	1	1	1	1	1	1	1	1	1	1	1	1	1	1	1	1	1	1	1	1	1
group_681		Big-13 domain-containing protein	568	568	1	1	2354	336	336	336	1	1	1	1	1	1	1	1	1	1	1	1	1	1	1	1	1	1	1	1	1	1	1	1	1	1	1	1	1	1	1	1	1	1	1	1	1	1	1
glpM	glpM	Dual-topology membrane protein YdgC GlpM family	568	568	1	1	2352	336	336	336	1	1	1	1	1	1	1	1	1	1	1	1	1	1	1	1	1	1	1	1	1	1	1	1	1	1	1	1	1	1	1	1	1	1	1	1	1	1	1
group_679		Outer membrane lipoprotein	568	568	1	1	2350	336	336	336	1	1	1	1	1	1	1	1	1	1	1	1	1	1	1	1	1	1	1	1	1	1	1	1	1	1	1	1	1	1	1	1	1	1	1	1	1	1	1
yeeX	yeeX	DUF496 domain-containing protein	568	568	1	1	2349	336	336	336	1	1	1	1	1	1	1	1	1	1	1	1	1	1	1	1	1	1	1	1	1	1	1	1	1	1	1	1	1	1	1	1	1	1	1	1	1	1	1
group_678		Inner membrane protein	568	568	1	1	2348	336	336	336	1	1	1	1	1	1	1	1	1	1	1	1	1	1	1	1	1	1	1	1	1	1	1	1	1	1	1	1	1	1	1	1	1	1	1	1	1	1	1
arnE	arnE	4-amino-4-deoxy-L-arabinose-phosphoundecaprenol flippase subunit ArnE	568	568	1	1	2347	336	336	336	1	1	1	1	1	1	1	1	1	1	1	1	1	1	1	1	1	1	1	1	1	1	1	1	1	1	1	1	1	1	1	1	1	1	1	1	1	1	1
eutS	eutS	Bacterial microcompartment shell protein EutS	568	568	1	1	2346	336	336	336	1	1	1	1	1	1	1	1	1	1	1	1	1	1	1	1	1	1	1	1	1	1	1	1	1	1	1	1	1	1	1	1	1	1	1	1	1	1	1
fdx	fdx	ISC system 2Fe-2S type ferredoxin	568	568	1	1	2345	336	336	336	1	1	1	1	1	1	1	1	1	1	1	1	1	1	1	1	1	1	1	1	1	1	1	1	1	1	1	1	1	1	1	1	1	1	1	1	1	1	1
tusA	tusA	sulfurtransferase TusA	568	568	1	1	2344	336	336	336	1	1	1	1	1	1	1	1	1	1	1	1	1	1	1	1	1	1	1	1	1	1	1	1	1	1	1	1	1	1	1	1	1	1	1	1	1	1	1
group_676		Inner membrane protein	568	568	1	1	2341	339	339	339	1	1	1	1	1	1	1	1	1	1	1	1	1	1	1	1	1	1	1	1	1	1	1	1	1	1	1	1	1	1	1	1	1	1	1	1	1	1	1
group_675		DUF2501 domain-containing protein	568	568	1	1	2340	339	339	339	1	1	1	1	1	1	1	1	1	1	1	1	1	1	1	1	1	1	1	1	1	1	1	1	1	1	1	1	1	1	1	1	1	1	1	1	1	1	1
glnK	glnK	P-II family nitrogen regulator	568	568	1	1	2339	339	339	339	1	1	1	1	1	1	1	1	1	1	1	1	1	1	1	1	1	1	1	1	1	1	1	1	1	1	1	1	1	1	1	1	1	1	1	1	1	1	1
glnB	glnB	nitrogen regulatory protein P-II	568	568	1	1	2337	339	339	339	1	1	1	1	1	1	1	1	1	1	1	1	1	1	1	1	1	1	1	1	1	1	1	1	1	1	1	1	1	1	1	1	1	1	1	1	1	1	1
bamE	bamE	outer membrane protein assembly factor BamE	568	568	1	1	2336	339	339	339	1	1	1	1	1	1	1	1	1	1	1	1	1	1	1	1	1	1	1	1	1	1	1	1	1	1	1	1	1	1	1	1	1	1	1	1	1	1	1
osmE	osmE	osmotically-inducible lipoprotein OsmE	568	568	1	1	2329	342	342	342	1	1	1	1	1	1	1	1	1	1	1	1	1	1	1	1	1	1	1	1	1	1	1	1	1	1	1	1	1	1	1	1	1	1	1	1	1	1	1
group_669	tehB	Tellurite resistance protein TehB SAM-dependent methylase cupin superfamily	568	568	1	1	2327	342	342	342	1	1	1	1	1	1	1	1	1	1	1	1	1	1	1	1	1	1	1	1	1	1	1	1	1	1	1	1	1	1	1	1	1	1	1	1	1	1	1
flhD	flhD	flagellar transcriptional regulator FlhD	568	568	1	1	2326	342	342	342	1	1	1	1	1	1	1	1	1	1	1	1	1	1	1	1	1	1	1	1	1	1	1	1	1	1	1	1	1	1	1	1	1	1	1	1	1	1	1
group_668	hypA	hydrogenase maturation nickel metallochaperone HypA	568	568	1	1	2325	342	342	342	1	1	1	1	1	1	1	1	1	1	1	1	1	1	1	1	1	1	1	1	1	1	1	1	1	1	1	1	1	1	1	1	1	1	1	1	1	1	1
ytfP	ytfP	Gamma-glutamylcyclotransferase family protein ytfP	568	568	1	1	2322	345	345	345	1	1	1	1	1	1	1	1	1	1	1	1	1	1	1	1	1	1	1	1	1	1	1	1	1	1	1	1	1	1	1	1	1	1	1	1	1	1	1
erpA	erpA	iron-sulfur cluster insertion protein ErpA	568	568	1	1	2321	345	345	345	1	1	1	1	1	1	1	1	1	1	1	1	1	1	1	1	1	1	1	1	1	1	1	1	1	1	1	1	1	1	1	1	1	1	1	1	1	1	1
group_665	ridA	Enamine deaminase RidA house cleaning of reactive enamine intermediates YjgF/YER057c/UK114 family	568	568	1	1	2320	345	345	345	1	1	1	1	1	1	1	1	1	1	1	1	1	1	1	1	1	1	1	1	1	1	1	1	1	1	1	1	1	1	1	1	1	1	1	1	1	1	1
group_660		DNA-binding protein	568	568	1	1	2315	348	348	348	1	1	1	1	1	1	1	1	1	1	1	1	1	1	1	1	1	1	1	1	1	1	1	1	1	1	1	1	1	1	1	1	1	1	1	1	1	1	1
cutA	cutA	divalent cation tolerance protein CutA	568	568	1	1	2314	348	348	348	1	1	1	1	1	1	1	1	1	1	1	1	1	1	1	1	1	1	1	1	1	1	1	1	1	1	1	1	1	1	1	1	1	1	1	1	1	1	1
group_658		NYN domain-containing protein	568	568	1	1	2312	348	348	348	1	1	1	1	1	1	1	1	1	1	1	1	1	1	1	1	1	1	1	1	1	1	1	1	1	1	1	1	1	1	1	1	1	1	1	1	1	1	1
yajD	yajD	HNH nuclease YajD	568	568	1	1	2311	348	348	348	1	1	1	1	1	1	1	1	1	1	1	1	1	1	1	1	1	1	1	1	1	1	1	1	1	1	1	1	1	1	1	1	1	1	1	1	1	1	1
sdhD	sdhD	succinate dehydrogenase membrane anchor subunit	568	568	1	1	2310	348	348	348	1	1	1	1	1	1	1	1	1	1	1	1	1	1	1	1	1	1	1	1	1	1	1	1	1	1	1	1	1	1	1	1	1	1	1	1	1	1	1
yeaO	yeaO	DUF488 domain-containing protein	568	568	1	1	2309	348	348	348	1	1	1	1	1	1	1	1	1	1	1	1	1	1	1	1	1	1	1	1	1	1	1	1	1	1	1	1	1	1	1	1	1	1	1	1	1	1	1
rplS	rplS	50S ribosomal protein L19	568	568	1	1	2307	348	348	348	1	1	1	1	1	1	1	1	1	1	1	1	1	1	1	1	1	1	1	1	1	1	1	1	1	1	1	1	1	1	1	1	1	1	1	1	1	1	1
pduU	pduU	propanediol utilization microcompartment protein PduU	568	568	1	1	2301	351	351	351	1	1	1	1	1	1	1	1	1	1	1	1	1	1	1	1	1	1	1	1	1	1	1	1	1	1	1	1	1	1	1	1	1	1	1	1	1	1	1
group_655		DUF2002 domain-containing protein	568	568	1	1	2300	351	351	351	1	1	1	1	1	1	1	1	1	1	1	1	1	1	1	1	1	1	1	1	1	1	1	1	1	1	1	1	1	1	1	1	1	1	1	1	1	1	1
group_654		DUF4156 domain-containing protein	568	568	1	1	2299	354	354	354	1	1	1	1	1	1	1	1	1	1	1	1	1	1	1	1	1	1	1	1	1	1	1	1	1	1	1	1	1	1	1	1	1	1	1	1	1	1	1
ychN	ychN	Protein YchN	568	568	1	1	2298	354	354	354	1	1	1	1	1	1	1	1	1	1	1	1	1	1	1	1	1	1	1	1	1	1	1	1	1	1	1	1	1	1	1	1	1	1	1	1	1	1	1
yebF	yebF	protein YebF	568	568	1	1	2297	354	354	354	1	1	1	1	1	1	1	1	1	1	1	1	1	1	1	1	1	1	1	1	1	1	1	1	1	1	1	1	1	1	1	1	1	1	1	1	1	1	1
group_653		Exported protein	568	568	1	1	2296	354	354	354	1	1	1	1	1	1	1	1	1	1	1	1	1	1	1	1	1	1	1	1	1	1	1	1	1	1	1	1	1	1	1	1	1	1	1	1	1	1	1
group_652		Diaminopimelate decarboxylase	568	568	1	1	2295	354	354	354	1	1	1	1	1	1	1	1	1	1	1	1	1	1	1	1	1	1	1	1	1	1	1	1	1	1	1	1	1	1	1	1	1	1	1	1	1	1	1
rplR	rplR	50S ribosomal protein L18	568	568	1	1	2294	354	354	354	1	1	1	1	1	1	1	1	1	1	1	1	1	1	1	1	1	1	1	1	1	1	1	1	1	1	1	1	1	1	1	1	1	1	1	1	1	1	1
yjbR	yjbR	putative protein YjbR	568	568	1	1	2291	357	357	357	1	1	1	1	1	1	1	1	1	1	1	1	1	1	1	1	1	1	1	1	1	1	1	1	1	1	1	1	1	1	1	1	1	1	1	1	1	1	1
group_650	thrS	threonine--tRNA ligase	568	568	1	1	2290	357	357	357	1	1	1	1	1	1	1	1	1	1	1	1	1	1	1	1	1	1	1	1	1	1	1	1	1	1	1	1	1	1	1	1	1	1	1	1	1	1	1
group_648	arsC	ArsC family reductase	568	568	1	1	2288	357	357	357	1	1	1	1	1	1	1	1	1	1	1	1	1	1	1	1	1	1	1	1	1	1	1	1	1	1	1	1	1	1	1	1	1	1	1	1	1	1	1
rpsM	rpsM	30S ribosomal protein S13	568	568	1	1	2285	357	357	357	1	1	1	1	1	1	1	1	1	1	1	1	1	1	1	1	1	1	1	1	1	1	1	1	1	1	1	1	1	1	1	1	1	1	1	1	1	1	1
tusC	tusC	sulfurtransferase complex subunit TusC	568	568	1	1	2284	357	357	357	1	1	1	1	1	1	1	1	1	1	1	1	1	1	1	1	1	1	1	1	1	1	1	1	1	1	1	1	1	1	1	1	1	1	1	1	1	1	1
rrrD	rrrD	Phage-related lysozyme (muramidase) GH24 family	568	568	1	1	2283	357	357	357	1	1	1	1	1	1	1	1	1	1	1	1	1	1	1	1	1	1	1	1	1	1	1	1	1	1	1	1	1	1	1	1	1	1	1	1	1	1	1
frdD	frdD	fumarate reductase subunit FrdD	568	568	1	1	2280	360	360	360	1	1	1	1	1	1	1	1	1	1	1	1	1	1	1	1	1	1	1	1	1	1	1	1	1	1	1	1	1	1	1	1	1	1	1	1	1	1	1
group_643		Copper resistance protein	568	568	1	1	2278	360	360	360	1	1	1	1	1	1	1	1	1	1	1	1	1	1	1	1	1	1	1	1	1	1	1	1	1	1	1	1	1	1	1	1	1	1	1	1	1	1	1
arsC	arsC	arsenate reductase (glutaredoxin)	568	568	1	1	2275	360	360	360	1	1	1	1	1	1	1	1	1	1	1	1	1	1	1	1	1	1	1	1	1	1	1	1	1	1	1	1	1	1	1	1	1	1	1	1	1	1	1
gutM	gutM	transcriptional regulator GutM	568	568	1	1	2274	360	360	360	1	1	1	1	1	1	1	1	1	1	1	1	1	1	1	1	1	1	1	1	1	1	1	1	1	1	1	1	1	1	1	1	1	1	1	1	1	1	1
folB	folB	bifunctional dihydroneopterin aldolase/78-dihydroneopterin epimerase	568	568	1	1	2273	360	360	360	1	1	1	1	1	1	1	1	1	1	1	1	1	1	1	1	1	1	1	1	1	1	1	1	1	1	1	1	1	1	1	1	1	1	1	1	1	1	1
relE	relE	Toxin-antitoxin system toxin component RelE	568	568	1	1	2272	360	360	360	1	1	1	1	1	1	1	1	1	1	1	1	1	1	1	1	1	1	1	1	1	1	1	1	1	1	1	1	1	1	1	1	1	1	1	1	1	1	1
group_637		Cytoplasmic protein	568	568	1	1	2267	363	363	363	1	1	1	1	1	1	1	1	1	1	1	1	1	1	1	1	1	1	1	1	1	1	1	1	1	1	1	1	1	1	1	1	1	1	1	1	1	1	1
group_636		EF_0830/AHA_3911 family protein	568	568	1	1	2266	363	363	363	1	1	1	1	1	1	1	1	1	1	1	1	1	1	1	1	1	1	1	1	1	1	1	1	1	1	1	1	1	1	1	1	1	1	1	1	1	1	1
yacL	yacL	protein YacL	568	568	1	1	2265	363	363	363	1	1	1	1	1	1	1	1	1	1	1	1	1	1	1	1	1	1	1	1	1	1	1	1	1	1	1	1	1	1	1	1	1	1	1	1	1	1	1
tehB	tehB	Tellurite resistance protein TehB SAM-dependent methylase cupin superfamily	568	568	1	1	2262	363	363	363	1	1	1	1	1	1	1	1	1	1	1	1	1	1	1	1	1	1	1	1	1	1	1	1	1	1	1	1	1	1	1	1	1	1	1	1	1	1	1
mliC	mliC	C-type lysozyme inhibitor	568	568	1	1	2261	363	363	363	1	1	1	1	1	1	1	1	1	1	1	1	1	1	1	1	1	1	1	1	1	1	1	1	1	1	1	1	1	1	1	1	1	1	1	1	1	1	1
mdtJ	mdtJ	Spermidine export protein MdtJ	568	568	1	1	2260	363	363	363	1	1	1	1	1	1	1	1	1	1	1	1	1	1	1	1	1	1	1	1	1	1	1	1	1	1	1	1	1	1	1	1	1	1	1	1	1	1	1
group_635		DNA-binding transcriptional regulator	568	568	1	1	2259	363	363	363	1	1	1	1	1	1	1	1	1	1	1	1	1	1	1	1	1	1	1	1	1	1	1	1	1	1	1	1	1	1	1	1	1	1	1	1	1	1	1
yfeK	yfeK	YfeK family protein	568	568	1	1	2258	363	363	363	1	1	1	1	1	1	1	1	1	1	1	1	1	1	1	1	1	1	1	1	1	1	1	1	1	1	1	1	1	1	1	1	1	1	1	1	1	1	1
srlB	srlB	PTS glucitol/sorbitol transporter subunit IIA	568	568	1	1	2257	363	363	363	1	1	1	1	1	1	1	1	1	1	1	1	1	1	1	1	1	1	1	1	1	1	1	1	1	1	1	1	1	1	1	1	1	1	1	1	1	1	1
queD	queD	6-carboxytetrahydropterin synthase QueD	568	568	1	1	2256	363	363	363	1	1	1	1	1	1	1	1	1	1	1	1	1	1	1	1	1	1	1	1	1	1	1	1	1	1	1	1	1	1	1	1	1	1	1	1	1	1	1
yibL	yibL	YibL family ribosome-associated protein	568	568	1	1	2255	363	363	363	1	1	1	1	1	1	1	1	1	1	1	1	1	1	1	1	1	1	1	1	1	1	1	1	1	1	1	1	1	1	1	1	1	1	1	1	1	1	1
ftsL	ftsL	cell division protein FtsL	568	568	1	1	2250	366	366	366	1	1	1	1	1	1	1	1	1	1	1	1	1	1	1	1	1	1	1	1	1	1	1	1	1	1	1	1	1	1	1	1	1	1	1	1	1	1	1
vOC	vOC	Lactoylglutathione lyase-related enzyme vicinal oxygen chelate (VOC) family	568	568	1	1	2249	366	366	366	1	1	1	1	1	1	1	1	1	1	1	1	1	1	1	1	1	1	1	1	1	1	1	1	1	1	1	1	1	1	1	1	1	1	1	1	1	1	1
group_630	eAL	EAL domain c-di-GMP-specific phosphodiesterase class I (or its enzymatically inactive variant)	568	568	1	1	2248	369	369	369	1	1	1	1	1	1	1	1	1	1	1	1	1	1	1	1	1	1	1	1	1	1	1	1	1	1	1	1	1	1	1	1	1	1	1	1	1	1	1
sufA	sufA	Fe-S cluster assembly scaffold SufA	568	568	1	1	2247	369	369	369	1	1	1	1	1	1	1	1	1	1	1	1	1	1	1	1	1	1	1	1	1	1	1	1	1	1	1	1	1	1	1	1	1	1	1	1	1	1	1
ssaM	ssaM	SPI-2 type III secretion system apparatus protein SsaM	568	568	1	1	2246	369	369	369	1	1	1	1	1	1	1	1	1	1	1	1	1	1	1	1	1	1	1	1	1	1	1	1	1	1	1	1	1	1	1	1	1	1	1	1	1	1	1
group_629		DUF1090 domain-containing protein	568	568	1	1	2245	369	369	369	1	1	1	1	1	1	1	1	1	1	1	1	1	1	1	1	1	1	1	1	1	1	1	1	1	1	1	1	1	1	1	1	1	1	1	1	1	1	1
group_628		DJC28-CD domain-containing protein	568	568	1	1	2244	369	369	369	1	1	1	1	1	1	1	1	1	1	1	1	1	1	1	1	1	1	1	1	1	1	1	1	1	1	1	1	1	1	1	1	1	1	1	1	1	1	1
doc	doc	Prophage maintenance system killer protein	568	568	1	1	2243	369	369	369	1	1	1	1	1	1	1	1	1	1	1	1	1	1	1	1	1	1	1	1	1	1	1	1	1	1	1	1	1	1	1	1	1	1	1	1	1	1	1
fliT	fliT	flagella biosynthesis regulatory protein FliT	568	568	1	1	2242	372	372	372	1	1	1	1	1	1	1	1	1	1	1	1	1	1	1	1	1	1	1	1	1	1	1	1	1	1	1	1	1	1	1	1	1	1	1	1	1	1	1
group_626		DNA-binding transcriptional regulator	568	568	1	1	2240	372	372	372	1	1	1	1	1	1	1	1	1	1	1	1	1	1	1	1	1	1	1	1	1	1	1	1	1	1	1	1	1	1	1	1	1	1	1	1	1	1	1
rplN	rplN	50S ribosomal protein L14	568	568	1	1	2239	372	372	372	1	1	1	1	1	1	1	1	1	1	1	1	1	1	1	1	1	1	1	1	1	1	1	1	1	1	1	1	1	1	1	1	1	1	1	1	1	1	1
group_625		DUF2500 domain-containing protein	568	568	1	1	2238	372	372	372	1	1	1	1	1	1	1	1	1	1	1	1	1	1	1	1	1	1	1	1	1	1	1	1	1	1	1	1	1	1	1	1	1	1	1	1	1	1	1
comEA	comEA	DNA uptake protein ComE or related DNA-binding protein	568	568	1	1	2237	375	375	375	1	1	1	1	1	1	1	1	1	1	1	1	1	1	1	1	1	1	1	1	1	1	1	1	1	1	1	1	1	1	1	1	1	1	1	1	1	1	1
tomB	tomB	Hha toxicity modulator TomB	568	568	1	1	2236	375	375	375	1	1	1	1	1	1	1	1	1	1	1	1	1	1	1	1	1	1	1	1	1	1	1	1	1	1	1	1	1	1	1	1	1	1	1	1	1	1	1
mysB	mysB	MysB family protein	568	568	1	1	2235	375	375	375	1	1	1	1	1	1	1	1	1	1	1	1	1	1	1	1	1	1	1	1	1	1	1	1	1	1	1	1	1	1	1	1	1	1	1	1	1	1	1
ycfL	ycfL	putative conserved protein YcfL	568	568	1	1	2234	375	375	375	1	1	1	1	1	1	1	1	1	1	1	1	1	1	1	1	1	1	1	1	1	1	1	1	1	1	1	1	1	1	1	1	1	1	1	1	1	1	1
yobA	yobA	CopC domain-containing protein YobA	568	568	1	1	2233	375	375	375	1	1	1	1	1	1	1	1	1	1	1	1	1	1	1	1	1	1	1	1	1	1	1	1	1	1	1	1	1	1	1	1	1	1	1	1	1	1	1
group_624		HTH Mu-type domain-containing protein	568	568	1	1	2232	375	375	375	1	1	1	1	1	1	1	1	1	1	1	1	1	1	1	1	1	1	1	1	1	1	1	1	1	1	1	1	1	1	1	1	1	1	1	1	1	1	1
group_623		putative enzyme of the cupin superfamily	568	568	1	1	2231	375	375	375	1	1	1	1	1	1	1	1	1	1	1	1	1	1	1	1	1	1	1	1	1	1	1	1	1	1	1	1	1	1	1	1	1	1	1	1	1	1	1
rpsL	rpsL	30S ribosomal protein S12	568	568	1	1	2230	375	375	375	1	1	1	1	1	1	1	1	1	1	1	1	1	1	1	1	1	1	1	1	1	1	1	1	1	1	1	1	1	1	1	1	1	1	1	1	1	1	1
apaG	apaG	Co2+/Mg2+ efflux protein ApaG	568	568	1	1	2227	378	378	378	1	1	1	1	1	1	1	1	1	1	1	1	1	1	1	1	1	1	1	1	1	1	1	1	1	1	1	1	1	1	1	1	1	1	1	1	1	1	1
group_620	hinT	purine nucleoside phosphoramidase	568	568	1	1	2226	378	378	378	1	1	1	1	1	1	1	1	1	1	1	1	1	1	1	1	1	1	1	1	1	1	1	1	1	1	1	1	1	1	1	1	1	1	1	1	1	1	1
fliO	fliO	flagellar biosynthetic protein FliO	568	568	1	1	2225	378	378	378	1	1	1	1	1	1	1	1	1	1	1	1	1	1	1	1	1	1	1	1	1	1	1	1	1	1	1	1	1	1	1	1	1	1	1	1	1	1	1
arnF	arnF	4-amino-4-deoxy-L-arabinose-phosphoundecaprenol flippase subunit ArnF	568	568	1	1	2224	378	378	378	1	1	1	1	1	1	1	1	1	1	1	1	1	1	1	1	1	1	1	1	1	1	1	1	1	1	1	1	1	1	1	1	1	1	1	1	1	1	1
panD	panD	aspartate 1-decarboxylase	568	568	1	1	2222	381	381	381	1	1	1	1	1	1	1	1	1	1	1	1	1	1	1	1	1	1	1	1	1	1	1	1	1	1	1	1	1	1	1	1	1	1	1	1	1	1	1
acpS	acpS	Holo-[acyl-carrier-protein] synthase	568	568	1	1	2221	381	381	381	1	1	1	1	1	1	1	1	1	1	1	1	1	1	1	1	1	1	1	1	1	1	1	1	1	1	1	1	1	1	1	1	1	1	1	1	1	1	1
iraD	iraD	anti-adapter protein IraD	568	568	1	1	2219	381	381	381	1	1	1	1	1	1	1	1	1	1	1	1	1	1	1	1	1	1	1	1	1	1	1	1	1	1	1	1	1	1	1	1	1	1	1	1	1	1	1
group_617		Secreted protein	568	568	1	1	2218	381	381	381	1	1	1	1	1	1	1	1	1	1	1	1	1	1	1	1	1	1	1	1	1	1	1	1	1	1	1	1	1	1	1	1	1	1	1	1	1	1	1
bssR	bssR	biofilm formation regulator BssR	568	568	1	1	2214	384	384	384	1	1	1	1	1	1	1	1	1	1	1	1	1	1	1	1	1	1	1	1	1	1	1	1	1	1	1	1	1	1	1	1	1	1	1	1	1	1	1
panM	panM	aspartate 1-decarboxylase autocleavage activator PanM	568	568	1	1	2213	384	384	384	1	1	1	1	1	1	1	1	1	1	1	1	1	1	1	1	1	1	1	1	1	1	1	1	1	1	1	1	1	1	1	1	1	1	1	1	1	1	1
hxlR	hxlR	DNA-binding transcriptional regulator HxlR family	568	568	1	1	2210	387	387	387	1	1	1	1	1	1	1	1	1	1	1	1	1	1	1	1	1	1	1	1	1	1	1	1	1	1	1	1	1	1	1	1	1	1	1	1	1	1	1
cybC	cybC	cytochrome b562	568	568	1	1	2209	387	387	387	1	1	1	1	1	1	1	1	1	1	1	1	1	1	1	1	1	1	1	1	1	1	1	1	1	1	1	1	1	1	1	1	1	1	1	1	1	1	1
ridA	ridA	2-iminobutanoate/2-iminopropanoate deaminase	568	568	1	1	2208	387	387	387	1	1	1	1	1	1	1	1	1	1	1	1	1	1	1	1	1	1	1	1	1	1	1	1	1	1	1	1	1	1	1	1	1	1	1	1	1	1	1
yacC	yacC	YacC family pilotin-like protein	568	568	1	1	2207	387	387	387	1	1	1	1	1	1	1	1	1	1	1	1	1	1	1	1	1	1	1	1	1	1	1	1	1	1	1	1	1	1	1	1	1	1	1	1	1	1	1
ybgS	ybgS	putative protein YbgS	568	568	1	1	2206	387	387	387	1	1	1	1	1	1	1	1	1	1	1	1	1	1	1	1	1	1	1	1	1	1	1	1	1	1	1	1	1	1	1	1	1	1	1	1	1	1	1
iscU	iscU	Fe-S cluster assembly scaffold protein IscU NifU family	568	568	1	1	2205	387	387	387	1	1	1	1	1	1	1	1	1	1	1	1	1	1	1	1	1	1	1	1	1	1	1	1	1	1	1	1	1	1	1	1	1	1	1	1	1	1	1
tusD	tusD	sulfurtransferase complex subunit TusD	568	568	1	1	2204	387	387	387	1	1	1	1	1	1	1	1	1	1	1	1	1	1	1	1	1	1	1	1	1	1	1	1	1	1	1	1	1	1	1	1	1	1	1	1	1	1	1
group_608		DUF3021 domain-containing protein	568	568	1	1	2198	390	390	390	1	1	1	1	1	1	1	1	1	1	1	1	1	1	1	1	1	1	1	1	1	1	1	1	1	1	1	1	1	1	1	1	1	1	1	1	1	1	1
group_607	gloA	VOC family protein	568	568	1	1	2197	390	390	390	1	1	1	1	1	1	1	1	1	1	1	1	1	1	1	1	1	1	1	1	1	1	1	1	1	1	1	1	1	1	1	1	1	1	1	1	1	1	1
sirB2	sirB2	invasion regulator SirB2	568	568	1	1	2196	390	390	390	1	1	1	1	1	1	1	1	1	1	1	1	1	1	1	1	1	1	1	1	1	1	1	1	1	1	1	1	1	1	1	1	1	1	1	1	1	1	1
flhE	flhE	flagellar protein FlhE	568	568	1	1	2192	393	393	393	1	1	1	1	1	1	1	1	1	1	1	1	1	1	1	1	1	1	1	1	1	1	1	1	1	1	1	1	1	1	1	1	1	1	1	1	1	1	1
ydeI	ydeI	putative periplasmic protein YdeI with OB-fold BOF family	568	568	1	1	2191	393	393	393	1	1	1	1	1	1	1	1	1	1	1	1	1	1	1	1	1	1	1	1	1	1	1	1	1	1	1	1	1	1	1	1	1	1	1	1	1	1	1
rpsI	rpsI	30S ribosomal protein S9	568	568	1	1	2190	393	393	393	1	1	1	1	1	1	1	1	1	1	1	1	1	1	1	1	1	1	1	1	1	1	1	1	1	1	1	1	1	1	1	1	1	1	1	1	1	1	1
rpsH	rpsH	30S ribosomal protein S8	568	568	1	1	2189	393	393	393	1	1	1	1	1	1	1	1	1	1	1	1	1	1	1	1	1	1	1	1	1	1	1	1	1	1	1	1	1	1	1	1	1	1	1	1	1	1	1
frdC	frdC	fumarate reductase subunit FrdC	568	568	1	1	2187	396	396	396	1	1	1	1	1	1	1	1	1	1	1	1	1	1	1	1	1	1	1	1	1	1	1	1	1	1	1	1	1	1	1	1	1	1	1	1	1	1	1
rpsF	rpsF	30S ribosomal protein S6	568	568	1	1	2186	396	396	396	1	1	1	1	1	1	1	1	1	1	1	1	1	1	1	1	1	1	1	1	1	1	1	1	1	1	1	1	1	1	1	1	1	1	1	1	1	1	1
caiF	caiF	Carnitine metabolism transcriptional regulator CaiF	568	568	1	1	2185	396	396	396	1	1	1	1	1	1	1	1	1	1	1	1	1	1	1	1	1	1	1	1	1	1	1	1	1	1	1	1	1	1	1	1	1	1	1	1	1	1	1
group_602	mutT	8-oxo-dGTP diphosphatase MutT	568	568	1	1	2184	396	396	396	1	1	1	1	1	1	1	1	1	1	1	1	1	1	1	1	1	1	1	1	1	1	1	1	1	1	1	1	1	1	1	1	1	1	1	1	1	1	1
yecT	yecT	DUF1311 domain-containing protein	568	568	1	1	2183	396	396	396	1	1	1	1	1	1	1	1	1	1	1	1	1	1	1	1	1	1	1	1	1	1	1	1	1	1	1	1	1	1	1	1	1	1	1	1	1	1	1
ygdD	ygdD	DUF423 domain-containing protein	568	568	1	1	2181	396	396	396	1	1	1	1	1	1	1	1	1	1	1	1	1	1	1	1	1	1	1	1	1	1	1	1	1	1	1	1	1	1	1	1	1	1	1	1	1	1	1
yraN	yraN	YraN family protein	568	568	1	1	2180	396	396	396	1	1	1	1	1	1	1	1	1	1	1	1	1	1	1	1	1	1	1	1	1	1	1	1	1	1	1	1	1	1	1	1	1	1	1	1	1	1	1
yjfL	yjfL	UPF0719 inner membrane protein YjfL	568	568	1	1	2179	399	399	399	1	1	1	1	1	1	1	1	1	1	1	1	1	1	1	1	1	1	1	1	1	1	1	1	1	1	1	1	1	1	1	1	1	1	1	1	1	1	1
fadM	fadM	long-chain acyl-CoA thioesterase FadM	568	568	1	1	2177	399	399	399	1	1	1	1	1	1	1	1	1	1	1	1	1	1	1	1	1	1	1	1	1	1	1	1	1	1	1	1	1	1	1	1	1	1	1	1	1	1	1
vapC	vapC	tRNA(fMet)-specific endonuclease VapC	568	568	1	1	2175	399	399	399	1	1	1	1	1	1	1	1	1	1	1	1	1	1	1	1	1	1	1	1	1	1	1	1	1	1	1	1	1	1	1	1	1	1	1	1	1	1	1
yqjE	yqjE	putative membrane protein YqjE	568	568	1	1	2174	399	399	399	1	1	1	1	1	1	1	1	1	1	1	1	1	1	1	1	1	1	1	1	1	1	1	1	1	1	1	1	1	1	1	1	1	1	1	1	1	1	1
group_599		DUF2593 domain-containing protein	568	568	1	1	2172	402	402	402	1	1	1	1	1	1	1	1	1	1	1	1	1	1	1	1	1	1	1	1	1	1	1	1	1	1	1	1	1	1	1	1	1	1	1	1	1	1	1
yciA	yciA	acyl-CoA thioester hydrolase YciA	568	568	1	1	2171	402	402	402	1	1	1	1	1	1	1	1	1	1	1	1	1	1	1	1	1	1	1	1	1	1	1	1	1	1	1	1	1	1	1	1	1	1	1	1	1	1	1
rbfA	rbfA	30S ribosome-binding factor RbfA	568	568	1	1	2170	402	402	402	1	1	1	1	1	1	1	1	1	1	1	1	1	1	1	1	1	1	1	1	1	1	1	1	1	1	1	1	1	1	1	1	1	1	1	1	1	1	1
group_598		DUF2531 domain-containing protein	568	568	1	1	2169	402	402	402	1	1	1	1	1	1	1	1	1	1	1	1	1	1	1	1	1	1	1	1	1	1	1	1	1	1	1	1	1	1	1	1	1	1	1	1	1	1	1
hslR	hslR	ribosome-associated heat shock protein Hsp15	568	568	1	1	2168	402	402	402	1	1	1	1	1	1	1	1	1	1	1	1	1	1	1	1	1	1	1	1	1	1	1	1	1	1	1	1	1	1	1	1	1	1	1	1	1	1	1
yjfI	yjfI	DUF2170 domain-containing protein	568	568	1	1	2165	405	405	405	1	1	1	1	1	1	1	1	1	1	1	1	1	1	1	1	1	1	1	1	1	1	1	1	1	1	1	1	1	1	1	1	1	1	1	1	1	1	1
yaaI	yaaI	DUF2541 domain-containing protein	568	568	1	1	2164	405	405	405	1	1	1	1	1	1	1	1	1	1	1	1	1	1	1	1	1	1	1	1	1	1	1	1	1	1	1	1	1	1	1	1	1	1	1	1	1	1	1
rcsF	rcsF	Rcs stress response system protein RcsF	568	568	1	1	2163	405	405	405	1	1	1	1	1	1	1	1	1	1	1	1	1	1	1	1	1	1	1	1	1	1	1	1	1	1	1	1	1	1	1	1	1	1	1	1	1	1	1
sdhC	sdhC	succinate dehydrogenase cytochrome b556 subunit	568	568	1	1	2162	405	405	405	1	1	1	1	1	1	1	1	1	1	1	1	1	1	1	1	1	1	1	1	1	1	1	1	1	1	1	1	1	1	1	1	1	1	1	1	1	1	1
flgC	flgC	flagellar basal body rod protein FlgC	568	568	1	1	2161	405	405	405	1	1	1	1	1	1	1	1	1	1	1	1	1	1	1	1	1	1	1	1	1	1	1	1	1	1	1	1	1	1	1	1	1	1	1	1	1	1	1
ykgJ	ykgJ	putative protein YkgJ contains CxxCxxCC motif	568	568	1	1	2160	405	405	405	1	1	1	1	1	1	1	1	1	1	1	1	1	1	1	1	1	1	1	1	1	1	1	1	1	1	1	1	1	1	1	1	1	1	1	1	1	1	1
hyaE	hyaE	hydrogenase-1 operon protein HyaE	568	568	1	1	2159	405	405	405	1	1	1	1	1	1	1	1	1	1	1	1	1	1	1	1	1	1	1	1	1	1	1	1	1	1	1	1	1	1	1	1	1	1	1	1	1	1	1
group_594		Cytoplasmic protein	568	568	1	1	2157	405	405	405	1	1	1	1	1	1	1	1	1	1	1	1	1	1	1	1	1	1	1	1	1	1	1	1	1	1	1	1	1	1	1	1	1	1	1	1	1	1	1
yhfA	yhfA	OsmC family protein	568	568	1	1	2156	405	405	405	1	1	1	1	1	1	1	1	1	1	1	1	1	1	1	1	1	1	1	1	1	1	1	1	1	1	1	1	1	1	1	1	1	1	1	1	1	1	1
cpxP	cpxP	Periplasmic chaperone Spy Spy/CpxP family	568	568	1	1	2153	408	408	408	1	1	1	1	1	1	1	1	1	1	1	1	1	1	1	1	1	1	1	1	1	1	1	1	1	1	1	1	1	1	1	1	1	1	1	1	1	1	1
gloA	gloA	lactoylglutathione lyase	568	568	1	1	2152	408	408	408	1	1	1	1	1	1	1	1	1	1	1	1	1	1	1	1	1	1	1	1	1	1	1	1	1	1	1	1	1	1	1	1	1	1	1	1	1	1	1
fliS	fliS	flagellar export chaperone FliS	568	568	1	1	2151	408	408	408	1	1	1	1	1	1	1	1	1	1	1	1	1	1	1	1	1	1	1	1	1	1	1	1	1	1	1	1	1	1	1	1	1	1	1	1	1	1	1
group_591		DUF2509 domain-containing protein	568	568	1	1	2149	408	408	408	1	1	1	1	1	1	1	1	1	1	1	1	1	1	1	1	1	1	1	1	1	1	1	1	1	1	1	1	1	1	1	1	1	1	1	1	1	1	1
psiE	psiE	phosphate-starvation-inducible protein PsiE	568	568	1	1	2145	411	411	411	1	1	1	1	1	1	1	1	1	1	1	1	1	1	1	1	1	1	1	1	1	1	1	1	1	1	1	1	1	1	1	1	1	1	1	1	1	1	1
rnk	rnk	nucleoside diphosphate kinase regulator	568	568	1	1	2143	411	411	411	1	1	1	1	1	1	1	1	1	1	1	1	1	1	1	1	1	1	1	1	1	1	1	1	1	1	1	1	1	1	1	1	1	1	1	1	1	1	1
ybhQ	ybhQ	YbhQ family protein	568	568	1	1	2142	411	411	411	1	1	1	1	1	1	1	1	1	1	1	1	1	1	1	1	1	1	1	1	1	1	1	1	1	1	1	1	1	1	1	1	1	1	1	1	1	1	1
menI	menI	14-dihydroxy-2-naphthoyl-CoA hydrolase	568	568	1	1	2141	411	411	411	1	1	1	1	1	1	1	1	1	1	1	1	1	1	1	1	1	1	1	1	1	1	1	1	1	1	1	1	1	1	1	1	1	1	1	1	1	1	1
nrdI	nrdI	class Ib ribonucleoside-diphosphate reductase assembly flavoprotein NrdI	568	568	1	1	2139	411	411	411	1	1	1	1	1	1	1	1	1	1	1	1	1	1	1	1	1	1	1	1	1	1	1	1	1	1	1	1	1	1	1	1	1	1	1	1	1	1	1
hycH	hycH	Formate hydrogenlyase maturation protein HycH	568	568	1	1	2138	411	411	411	1	1	1	1	1	1	1	1	1	1	1	1	1	1	1	1	1	1	1	1	1	1	1	1	1	1	1	1	1	1	1	1	1	1	1	1	1	1	1
group_587		Cytoplasmic protein	568	568	1	1	2137	411	411	411	1	1	1	1	1	1	1	1	1	1	1	1	1	1	1	1	1	1	1	1	1	1	1	1	1	1	1	1	1	1	1	1	1	1	1	1	1	1	1
rplP	rplP	50S ribosomal protein L16	568	568	1	1	2136	411	411	411	1	1	1	1	1	1	1	1	1	1	1	1	1	1	1	1	1	1	1	1	1	1	1	1	1	1	1	1	1	1	1	1	1	1	1	1	1	1	1
group_583		DUF1795 domain-containing protein	568	568	1	1	2132	414	414	414	1	1	1	1	1	1	1	1	1	1	1	1	1	1	1	1	1	1	1	1	1	1	1	1	1	1	1	1	1	1	1	1	1	1	1	1	1	1	1
entH	entH	proofreading thioesterase EntH	568	568	1	1	2131	414	414	414	1	1	1	1	1	1	1	1	1	1	1	1	1	1	1	1	1	1	1	1	1	1	1	1	1	1	1	1	1	1	1	1	1	1	1	1	1	1	1
yccU	yccU	putative CoA-binding protein	568	568	1	1	2130	414	414	414	1	1	1	1	1	1	1	1	1	1	1	1	1	1	1	1	1	1	1	1	1	1	1	1	1	1	1	1	1	1	1	1	1	1	1	1	1	1	1
msrB	msrB	Peptide methionine sulfoxide reductase MsrB	568	568	1	1	2129	414	414	414	1	1	1	1	1	1	1	1	1	1	1	1	1	1	1	1	1	1	1	1	1	1	1	1	1	1	1	1	1	1	1	1	1	1	1	1	1	1	1
group_581		Inner membrane protein	568	568	1	1	2127	414	414	414	1	1	1	1	1	1	1	1	1	1	1	1	1	1	1	1	1	1	1	1	1	1	1	1	1	1	1	1	1	1	1	1	1	1	1	1	1	1	1
mscL	mscL	large-conductance mechanosensitive channel protein MscL	568	568	1	1	2126	414	414	414	1	1	1	1	1	1	1	1	1	1	1	1	1	1	1	1	1	1	1	1	1	1	1	1	1	1	1	1	1	1	1	1	1	1	1	1	1	1	1
yjbQ	yjbQ	UPF0047 protein YjbQ	568	568	1	1	2123	417	417	417	1	1	1	1	1	1	1	1	1	1	1	1	1	1	1	1	1	1	1	1	1	1	1	1	1	1	1	1	1	1	1	1	1	1	1	1	1	1	1
rraB	rraB	ribonuclease E inhibitor RraB	568	568	1	1	2122	417	417	417	1	1	1	1	1	1	1	1	1	1	1	1	1	1	1	1	1	1	1	1	1	1	1	1	1	1	1	1	1	1	1	1	1	1	1	1	1	1	1
cueR	cueR	Cu(I)-responsive transcriptional regulator	568	568	1	1	2120	417	417	417	1	1	1	1	1	1	1	1	1	1	1	1	1	1	1	1	1	1	1	1	1	1	1	1	1	1	1	1	1	1	1	1	1	1	1	1	1	1	1
flgB	flgB	flagellar basal body rod protein FlgB	568	568	1	1	2119	417	417	417	1	1	1	1	1	1	1	1	1	1	1	1	1	1	1	1	1	1	1	1	1	1	1	1	1	1	1	1	1	1	1	1	1	1	1	1	1	1	1
yjhB	yjhB	pyrimidine (deoxy)nucleoside triphosphate diphosphatase	568	568	1	1	2118	417	417	417	1	1	1	1	1	1	1	1	1	1	1	1	1	1	1	1	1	1	1	1	1	1	1	1	1	1	1	1	1	1	1	1	1	1	1	1	1	1	1
sufE	sufE	cysteine desulfuration protein SufE	568	568	1	1	2117	417	417	417	1	1	1	1	1	1	1	1	1	1	1	1	1	1	1	1	1	1	1	1	1	1	1	1	1	1	1	1	1	1	1	1	1	1	1	1	1	1	1
ruvX	ruvX	Holliday junction resolvase RuvX	568	568	1	1	2116	417	417	417	1	1	1	1	1	1	1	1	1	1	1	1	1	1	1	1	1	1	1	1	1	1	1	1	1	1	1	1	1	1	1	1	1	1	1	1	1	1	1
atpC	atpC	F0F1 ATP synthase subunit epsilon	568	568	1	1	2113	420	420	420	1	1	1	1	1	1	1	1	1	1	1	1	1	1	1	1	1	1	1	1	1	1	1	1	1	1	1	1	1	1	1	1	1	1	1	1	1	1	1
nusB	nusB	transcription antitermination factor NusB	568	568	1	1	2111	420	420	420	1	1	1	1	1	1	1	1	1	1	1	1	1	1	1	1	1	1	1	1	1	1	1	1	1	1	1	1	1	1	1	1	1	1	1	1	1	1	1
umuD	umuD	Protein UmuD	568	568	1	1	2110	420	420	420	1	1	1	1	1	1	1	1	1	1	1	1	1	1	1	1	1	1	1	1	1	1	1	1	1	1	1	1	1	1	1	1	1	1	1	1	1	1	1
group_572		Secreted protein	568	568	1	1	2104	423	423	423	1	1	1	1	1	1	1	1	1	1	1	1	1	1	1	1	1	1	1	1	1	1	1	1	1	1	1	1	1	1	1	1	1	1	1	1	1	1	1
arfB	arfB	alternative ribosome rescue aminoacyl-tRNA hydrolase ArfB	568	568	1	1	2103	423	423	423	1	1	1	1	1	1	1	1	1	1	1	1	1	1	1	1	1	1	1	1	1	1	1	1	1	1	1	1	1	1	1	1	1	1	1	1	1	1	1
flgN	flgN	flagella biosynthesis chaperone FlgN	568	568	1	1	2102	423	423	423	1	1	1	1	1	1	1	1	1	1	1	1	1	1	1	1	1	1	1	1	1	1	1	1	1	1	1	1	1	1	1	1	1	1	1	1	1	1	1
group_571	nudF	ADP-ribose diphosphatase	568	568	1	1	2101	423	423	423	1	1	1	1	1	1	1	1	1	1	1	1	1	1	1	1	1	1	1	1	1	1	1	1	1	1	1	1	1	1	1	1	1	1	1	1	1	1	1
nsrR	nsrR	nitric oxide-sensing transcriptional repressor NsrR	568	568	1	1	2096	426	426	426	1	1	1	1	1	1	1	1	1	1	1	1	1	1	1	1	1	1	1	1	1	1	1	1	1	1	1	1	1	1	1	1	1	1	1	1	1	1	1
gntT	gntT	H+/gluconate symporter GntT or related permease GntP/DsdX family	568	568	1	1	2095	426	426	426	1	1	1	1	1	1	1	1	1	1	1	1	1	1	1	1	1	1	1	1	1	1	1	1	1	1	1	1	1	1	1	1	1	1	1	1	1	1	1
ypeA	ypeA	GNAT family acetyltransferase	568	568	1	1	2094	426	426	426	1	1	1	1	1	1	1	1	1	1	1	1	1	1	1	1	1	1	1	1	1	1	1	1	1	1	1	1	1	1	1	1	1	1	1	1	1	1	1
aF0104	aF0104	DUF296 domain-containing protein	568	568	1	1	2093	426	426	426	1	1	1	1	1	1	1	1	1	1	1	1	1	1	1	1	1	1	1	1	1	1	1	1	1	1	1	1	1	1	1	1	1	1	1	1	1	1	1
exbD	exbD	TonB system transport protein ExbD	568	568	1	1	2092	426	426	426	1	1	1	1	1	1	1	1	1	1	1	1	1	1	1	1	1	1	1	1	1	1	1	1	1	1	1	1	1	1	1	1	1	1	1	1	1	1	1
zntR	zntR	Zn(2+)-responsive transcriptional regulator	568	568	1	1	2091	426	426	426	1	1	1	1	1	1	1	1	1	1	1	1	1	1	1	1	1	1	1	1	1	1	1	1	1	1	1	1	1	1	1	1	1	1	1	1	1	1	1
manX	manX	Phosphotransferase system mannose/fructose-specific component IIA	568	568	1	1	2090	426	426	426	1	1	1	1	1	1	1	1	1	1	1	1	1	1	1	1	1	1	1	1	1	1	1	1	1	1	1	1	1	1	1	1	1	1	1	1	1	1	1
uspG	uspG	universal stress protein UspG	568	568	1	1	2085	429	429	429	1	1	1	1	1	1	1	1	1	1	1	1	1	1	1	1	1	1	1	1	1	1	1	1	1	1	1	1	1	1	1	1	1	1	1	1	1	1	1
tolR	tolR	colicin uptake protein TolR	568	568	1	1	2084	429	429	429	1	1	1	1	1	1	1	1	1	1	1	1	1	1	1	1	1	1	1	1	1	1	1	1	1	1	1	1	1	1	1	1	1	1	1	1	1	1	1
uspC	uspC	universal stress protein UspC	568	568	1	1	2082	429	429	429	1	1	1	1	1	1	1	1	1	1	1	1	1	1	1	1	1	1	1	1	1	1	1	1	1	1	1	1	1	1	1	1	1	1	1	1	1	1	1
rplM	rplM	50S ribosomal protein L13	568	568	1	1	2081	429	429	429	1	1	1	1	1	1	1	1	1	1	1	1	1	1	1	1	1	1	1	1	1	1	1	1	1	1	1	1	1	1	1	1	1	1	1	1	1	1	1
group_563		Tricarboxylic transport	568	568	1	1	2080	432	432	432	1	1	1	1	1	1	1	1	1	1	1	1	1	1	1	1	1	1	1	1	1	1	1	1	1	1	1	1	1	1	1	1	1	1	1	1	1	1	1
yciW	yciW	Alkylhydroperoxidase family enzyme contains CxxC motif	568	568	1	1	2079	432	432	432	1	1	1	1	1	1	1	1	1	1	1	1	1	1	1	1	1	1	1	1	1	1	1	1	1	1	1	1	1	1	1	1	1	1	1	1	1	1	1
yhfF	yhfF	putative RNA-binding protein YhfF contains PUA-like ASCH domain	568	568	1	1	2075	435	435	435	1	1	1	1	1	1	1	1	1	1	1	1	1	1	1	1	1	1	1	1	1	1	1	1	1	1	1	1	1	1	1	1	1	1	1	1	1	1	1
phnO	phnO	aminoalkylphosphonate N-acetyltransferase	568	568	1	1	2074	435	435	435	1	1	1	1	1	1	1	1	1	1	1	1	1	1	1	1	1	1	1	1	1	1	1	1	1	1	1	1	1	1	1	1	1	1	1	1	1	1	1
group_559		AcrB/AcrD/AcrF family protein	568	568	1	1	2073	435	435	435	1	1	1	1	1	1	1	1	1	1	1	1	1	1	1	1	1	1	1	1	1	1	1	1	1	1	1	1	1	1	1	1	1	1	1	1	1	1	1
infC	infC	translation initiation factor IF-3	568	568	1	1	2072	435	435	435	1	1	1	1	1	1	1	1	1	1	1	1	1	1	1	1	1	1	1	1	1	1	1	1	1	1	1	1	1	1	1	1	1	1	1	1	1	1	1
rplO	rplO	50S ribosomal protein L15	568	568	1	1	2070	435	435	435	1	1	1	1	1	1	1	1	1	1	1	1	1	1	1	1	1	1	1	1	1	1	1	1	1	1	1	1	1	1	1	1	1	1	1	1	1	1	1
yjaB	yjaB	acetyltransferase	568	568	1	1	2066	438	438	438	1	1	1	1	1	1	1	1	1	1	1	1	1	1	1	1	1	1	1	1	1	1	1	1	1	1	1	1	1	1	1	1	1	1	1	1	1	1	1
holD	holD	DNA polymerase III subunit psi	568	568	1	1	2065	438	438	438	1	1	1	1	1	1	1	1	1	1	1	1	1	1	1	1	1	1	1	1	1	1	1	1	1	1	1	1	1	1	1	1	1	1	1	1	1	1	1
group_554	ptsN	Phosphotransferase system mannitol/fructose-specific IIA domain (Ntr-type)	568	568	1	1	2063	438	438	438	1	1	1	1	1	1	1	1	1	1	1	1	1	1	1	1	1	1	1	1	1	1	1	1	1	1	1	1	1	1	1	1	1	1	1	1	1	1	1
pasT	pasT	type II toxin-antitoxin system RatA family toxin	568	568	1	1	2062	438	438	438	1	1	1	1	1	1	1	1	1	1	1	1	1	1	1	1	1	1	1	1	1	1	1	1	1	1	1	1	1	1	1	1	1	1	1	1	1	1	1
hpaR	hpaR	homoprotocatechuate degradation operon regulator HpaR	568	568	1	1	2057	441	441	441	1	1	1	1	1	1	1	1	1	1	1	1	1	1	1	1	1	1	1	1	1	1	1	1	1	1	1	1	1	1	1	1	1	1	1	1	1	1	1
group_549		DUF2569 domain-containing protein	568	568	1	1	2056	441	441	441	1	1	1	1	1	1	1	1	1	1	1	1	1	1	1	1	1	1	1	1	1	1	1	1	1	1	1	1	1	1	1	1	1	1	1	1	1	1	1
mioC	mioC	FMN-binding protein MioC	568	568	1	1	2053	444	444	444	1	1	1	1	1	1	1	1	1	1	1	1	1	1	1	1	1	1	1	1	1	1	1	1	1	1	1	1	1	1	1	1	1	1	1	1	1	1	1
group_546		Lipoprotein	568	568	1	1	2052	444	444	444	1	1	1	1	1	1	1	1	1	1	1	1	1	1	1	1	1	1	1	1	1	1	1	1	1	1	1	1	1	1	1	1	1	1	1	1	1	1	1
group_545		Cyclic pyranopterin monophosphate synthase	568	568	1	1	2051	444	444	444	1	1	1	1	1	1	1	1	1	1	1	1	1	1	1	1	1	1	1	1	1	1	1	1	1	1	1	1	1	1	1	1	1	1	1	1	1	1	1
fliJ	fliJ	flagellar export protein FliJ	568	568	1	1	2050	444	444	444	1	1	1	1	1	1	1	1	1	1	1	1	1	1	1	1	1	1	1	1	1	1	1	1	1	1	1	1	1	1	1	1	1	1	1	1	1	1	1
spaM	spaM	SPI-1 type III secretion system protein SpaM	568	568	1	1	2049	444	444	444	1	1	1	1	1	1	1	1	1	1	1	1	1	1	1	1	1	1	1	1	1	1	1	1	1	1	1	1	1	1	1	1	1	1	1	1	1	1	1
csdE	csdE	cysteine desulfurase sulfur acceptor subunit CsdE	568	568	1	1	2047	444	444	444	1	1	1	1	1	1	1	1	1	1	1	1	1	1	1	1	1	1	1	1	1	1	1	1	1	1	1	1	1	1	1	1	1	1	1	1	1	1	1
group_542		Transposase	568	568	1	1	2044	447	447	447	1	1	1	1	1	1	1	1	1	1	1	1	1	1	1	1	1	1	1	1	1	1	1	1	1	1	1	1	1	1	1	1	1	1	1	1	1	1	1
group_541	hcp	Type VI protein secretion system component Hcp (secreted cytotoxin)	568	568	1	1	2043	447	447	447	1	1	1	1	1	1	1	1	1	1	1	1	1	1	1	1	1	1	1	1	1	1	1	1	1	1	1	1	1	1	1	1	1	1	1	1	1	1	1
group_539		[Ribosomal protein S18]-alanine N-acetyltransferase	568	568	1	1	2041	447	447	447	1	1	1	1	1	1	1	1	1	1	1	1	1	1	1	1	1	1	1	1	1	1	1	1	1	1	1	1	1	1	1	1	1	1	1	1	1	1	1
yeaL	yeaL	UPF0756 membrane protein CKO_01811	568	568	1	1	2040	447	447	447	1	1	1	1	1	1	1	1	1	1	1	1	1	1	1	1	1	1	1	1	1	1	1	1	1	1	1	1	1	1	1	1	1	1	1	1	1	1	1
group_538		DNK domain-containing protein	568	568	1	1	2039	447	447	447	1	1	1	1	1	1	1	1	1	1	1	1	1	1	1	1	1	1	1	1	1	1	1	1	1	1	1	1	1	1	1	1	1	1	1	1	1	1	1
rplI	rplI	50S ribosomal protein L9	568	568	1	1	2037	450	450	450	1	1	1	1	1	1	1	1	1	1	1	1	1	1	1	1	1	1	1	1	1	1	1	1	1	1	1	1	1	1	1	1	1	1	1	1	1	1	1
fkpB	fkpB	FKBP-type peptidyl-prolyl cis-trans isomerase	568	568	1	1	2035	450	450	450	1	1	1	1	1	1	1	1	1	1	1	1	1	1	1	1	1	1	1	1	1	1	1	1	1	1	1	1	1	1	1	1	1	1	1	1	1	1	1
nrdR	nrdR	transcriptional regulator NrdR	568	568	1	1	2034	450	450	450	1	1	1	1	1	1	1	1	1	1	1	1	1	1	1	1	1	1	1	1	1	1	1	1	1	1	1	1	1	1	1	1	1	1	1	1	1	1	1
group_534		GFA family protein	568	568	1	1	2032	450	450	450	1	1	1	1	1	1	1	1	1	1	1	1	1	1	1	1	1	1	1	1	1	1	1	1	1	1	1	1	1	1	1	1	1	1	1	1	1	1	1
group_533		Low molecular weight protein-tyrosine-phosphatase Wzb	568	568	1	1	2031	450	450	450	1	1	1	1	1	1	1	1	1	1	1	1	1	1	1	1	1	1	1	1	1	1	1	1	1	1	1	1	1	1	1	1	1	1	1	1	1	1	1
napB	napB	nitrate reductase cytochrome c-type subunit	568	568	1	1	2030	450	450	450	1	1	1	1	1	1	1	1	1	1	1	1	1	1	1	1	1	1	1	1	1	1	1	1	1	1	1	1	1	1	1	1	1	1	1	1	1	1	1
group_532		DUF2919 domain-containing protein	568	568	1	1	2029	450	450	450	1	1	1	1	1	1	1	1	1	1	1	1	1	1	1	1	1	1	1	1	1	1	1	1	1	1	1	1	1	1	1	1	1	1	1	1	1	1	1
kbp	kbp	potassium binding protein Kbp	568	568	1	1	2028	450	450	450	1	1	1	1	1	1	1	1	1	1	1	1	1	1	1	1	1	1	1	1	1	1	1	1	1	1	1	1	1	1	1	1	1	1	1	1	1	1	1
alaE	alaE	L-alanine exporter AlaE	568	568	1	1	2027	450	450	450	1	1	1	1	1	1	1	1	1	1	1	1	1	1	1	1	1	1	1	1	1	1	1	1	1	1	1	1	1	1	1	1	1	1	1	1	1	1	1
nuoA	nuoA	NADH-quinone oxidoreductase subunit NuoA	568	568	1	1	2025	453	453	453	1	1	1	1	1	1	1	1	1	1	1	1	1	1	1	1	1	1	1	1	1	1	1	1	1	1	1	1	1	1	1	1	1	1	1	1	1	1	1
group_530	ebgC	Beta-galactosidase beta subunit	568	568	1	1	2024	453	453	453	1	1	1	1	1	1	1	1	1	1	1	1	1	1	1	1	1	1	1	1	1	1	1	1	1	1	1	1	1	1	1	1	1	1	1	1	1	1	1
fur	fur	ferric iron uptake transcriptional regulator	568	568	1	1	2023	453	453	453	1	1	1	1	1	1	1	1	1	1	1	1	1	1	1	1	1	1	1	1	1	1	1	1	1	1	1	1	1	1	1	1	1	1	1	1	1	1	1
moaE	moaE	molybdopterin synthase catalytic subunit MoaE	568	568	1	1	2022	453	453	453	1	1	1	1	1	1	1	1	1	1	1	1	1	1	1	1	1	1	1	1	1	1	1	1	1	1	1	1	1	1	1	1	1	1	1	1	1	1	1
matP	matP	macrodomain Ter protein MatP	568	568	1	1	2021	453	453	453	1	1	1	1	1	1	1	1	1	1	1	1	1	1	1	1	1	1	1	1	1	1	1	1	1	1	1	1	1	1	1	1	1	1	1	1	1	1	1
pduV	pduV	propanediol utilization protein PduV	568	568	1	1	2020	453	453	453	1	1	1	1	1	1	1	1	1	1	1	1	1	1	1	1	1	1	1	1	1	1	1	1	1	1	1	1	1	1	1	1	1	1	1	1	1	1	1
yicN	yicN	YicN	568	568	1	1	2019	453	453	453	1	1	1	1	1	1	1	1	1	1	1	1	1	1	1	1	1	1	1	1	1	1	1	1	1	1	1	1	1	1	1	1	1	1	1	1	1	1	1
dksA	dksA	RNA polymerase-binding protein DksA	568	568	1	1	2014	456	456	456	1	1	1	1	1	1	1	1	1	1	1	1	1	1	1	1	1	1	1	1	1	1	1	1	1	1	1	1	1	1	1	1	1	1	1	1	1	1	1
fabZ	fabZ	3-hydroxyacyl-ACP dehydratase FabZ	568	568	1	1	2013	456	456	456	1	1	1	1	1	1	1	1	1	1	1	1	1	1	1	1	1	1	1	1	1	1	1	1	1	1	1	1	1	1	1	1	1	1	1	1	1	1	1
yfbV	yfbV	UPF0208 membrane protein YfbV	568	568	1	1	2011	456	456	456	1	1	1	1	1	1	1	1	1	1	1	1	1	1	1	1	1	1	1	1	1	1	1	1	1	1	1	1	1	1	1	1	1	1	1	1	1	1	1
group_524		multidrug/biocide efflux PACE transporter	568	568	1	1	2010	456	456	456	1	1	1	1	1	1	1	1	1	1	1	1	1	1	1	1	1	1	1	1	1	1	1	1	1	1	1	1	1	1	1	1	1	1	1	1	1	1	1
sprT	sprT	SprT family zinc-dependent metalloprotease	568	568	1	1	2009	456	456	456	1	1	1	1	1	1	1	1	1	1	1	1	1	1	1	1	1	1	1	1	1	1	1	1	1	1	1	1	1	1	1	1	1	1	1	1	1	1	1
hinT	hinT	Purine nucleoside phosphoramidase/Ap4A hydrolase histidine triade (HIT) family	568	568	1	1	2008	456	456	456	1	1	1	1	1	1	1	1	1	1	1	1	1	1	1	1	1	1	1	1	1	1	1	1	1	1	1	1	1	1	1	1	1	1	1	1	1	1	1
asnC	asnC	transcriptional regulator AsnC	568	568	1	1	2005	459	459	459	1	1	1	1	1	1	1	1	1	1	1	1	1	1	1	1	1	1	1	1	1	1	1	1	1	1	1	1	1	1	1	1	1	1	1	1	1	1	1
decR	decR	DNA-binding transcriptional regulator DecR	568	568	1	1	2004	459	459	459	1	1	1	1	1	1	1	1	1	1	1	1	1	1	1	1	1	1	1	1	1	1	1	1	1	1	1	1	1	1	1	1	1	1	1	1	1	1	1
mgsA	mgsA	methylglyoxal synthase	568	568	1	1	2003	459	459	459	1	1	1	1	1	1	1	1	1	1	1	1	1	1	1	1	1	1	1	1	1	1	1	1	1	1	1	1	1	1	1	1	1	1	1	1	1	1	1
dut	dut	dUTP diphosphatase	568	568	1	1	2002	459	459	459	1	1	1	1	1	1	1	1	1	1	1	1	1	1	1	1	1	1	1	1	1	1	1	1	1	1	1	1	1	1	1	1	1	1	1	1	1	1	1
tsaE	tsaE	tRNA (adenosine(37)-N6)-threonylcarbamoyltransferase complex ATPase subunit type 1 TsaE	568	568	1	1	2000	462	462	462	1	1	1	1	1	1	1	1	1	1	1	1	1	1	1	1	1	1	1	1	1	1	1	1	1	1	1	1	1	1	1	1	1	1	1	1	1	1	1
pyrI	pyrI	aspartate carbamoyltransferase regulatory subunit	568	568	1	1	1999	462	462	462	1	1	1	1	1	1	1	1	1	1	1	1	1	1	1	1	1	1	1	1	1	1	1	1	1	1	1	1	1	1	1	1	1	1	1	1	1	1	1
group_519		Transporter gate domain-containing protein	568	568	1	1	1997	462	462	462	1	1	1	1	1	1	1	1	1	1	1	1	1	1	1	1	1	1	1	1	1	1	1	1	1	1	1	1	1	1	1	1	1	1	1	1	1	1	1
group_518	lrp	DNA-binding transcriptional regulator Lrp family	568	568	1	1	1996	462	462	462	1	1	1	1	1	1	1	1	1	1	1	1	1	1	1	1	1	1	1	1	1	1	1	1	1	1	1	1	1	1	1	1	1	1	1	1	1	1	1
mutT	mutT	8-oxo-dGTP pyrophosphatase MutT and related house-cleaning NTP pyrophosphohydrolases NUDIX family	568	568	1	1	1995	462	462	462	1	1	1	1	1	1	1	1	1	1	1	1	1	1	1	1	1	1	1	1	1	1	1	1	1	1	1	1	1	1	1	1	1	1	1	1	1	1	1
elaA	elaA	GNAT family N-acetyltransferase	568	568	1	1	1994	462	462	462	1	1	1	1	1	1	1	1	1	1	1	1	1	1	1	1	1	1	1	1	1	1	1	1	1	1	1	1	1	1	1	1	1	1	1	1	1	1	1
ulaC	ulaC	PTS ascorbate transporter subunit IIA	568	568	1	1	1989	465	465	465	1	1	1	1	1	1	1	1	1	1	1	1	1	1	1	1	1	1	1	1	1	1	1	1	1	1	1	1	1	1	1	1	1	1	1	1	1	1	1
nrdG	nrdG	anaerobic ribonucleoside-triphosphate reductase-activating protein	568	568	1	1	1988	465	465	465	1	1	1	1	1	1	1	1	1	1	1	1	1	1	1	1	1	1	1	1	1	1	1	1	1	1	1	1	1	1	1	1	1	1	1	1	1	1	1
nlpC	nlpC	Cell wall-associated hydrolase NlpC_P60 family	568	568	1	1	1986	465	465	465	1	1	1	1	1	1	1	1	1	1	1	1	1	1	1	1	1	1	1	1	1	1	1	1	1	1	1	1	1	1	1	1	1	1	1	1	1	1	1
group_514		Permuted papain-like amidase enzyme YaeF/YiiX C92 family	568	568	1	1	1985	465	465	465	1	1	1	1	1	1	1	1	1	1	1	1	1	1	1	1	1	1	1	1	1	1	1	1	1	1	1	1	1	1	1	1	1	1	1	1	1	1	1
gatA	gatA	PTS galactitol transporter subunit IIA	568	568	1	1	1984	465	465	465	1	1	1	1	1	1	1	1	1	1	1	1	1	1	1	1	1	1	1	1	1	1	1	1	1	1	1	1	1	1	1	1	1	1	1	1	1	1	1
group_513	ebgC	Beta-galactosidase beta subunit	568	568	1	1	1983	465	465	465	1	1	1	1	1	1	1	1	1	1	1	1	1	1	1	1	1	1	1	1	1	1	1	1	1	1	1	1	1	1	1	1	1	1	1	1	1	1	1
group_512		Inner membrane protein	568	568	1	1	1982	465	465	465	1	1	1	1	1	1	1	1	1	1	1	1	1	1	1	1	1	1	1	1	1	1	1	1	1	1	1	1	1	1	1	1	1	1	1	1	1	1	1
yigI	yigI	thioesterase family protein	568	568	1	1	1980	468	468	468	1	1	1	1	1	1	1	1	1	1	1	1	1	1	1	1	1	1	1	1	1	1	1	1	1	1	1	1	1	1	1	1	1	1	1	1	1	1	1
rnhA	rnhA	ribonuclease HI	568	568	1	1	1979	468	468	468	1	1	1	1	1	1	1	1	1	1	1	1	1	1	1	1	1	1	1	1	1	1	1	1	1	1	1	1	1	1	1	1	1	1	1	1	1	1	1
rlmH	rlmH	23S rRNA (pseudouridine(1915)-N(3))-methyltransferase RlmH	568	568	1	1	1978	468	468	468	1	1	1	1	1	1	1	1	1	1	1	1	1	1	1	1	1	1	1	1	1	1	1	1	1	1	1	1	1	1	1	1	1	1	1	1	1	1	1
slyB	slyB	outer membrane lipoprotein SlyB	568	568	1	1	1977	468	468	468	1	1	1	1	1	1	1	1	1	1	1	1	1	1	1	1	1	1	1	1	1	1	1	1	1	1	1	1	1	1	1	1	1	1	1	1	1	1	1
fliL	fliL	flagellar basal body-associated protein FliL	568	568	1	1	1976	468	468	468	1	1	1	1	1	1	1	1	1	1	1	1	1	1	1	1	1	1	1	1	1	1	1	1	1	1	1	1	1	1	1	1	1	1	1	1	1	1	1
group_510		Carboxymuconolactone decarboxylase family protein	568	568	1	1	1975	468	468	468	1	1	1	1	1	1	1	1	1	1	1	1	1	1	1	1	1	1	1	1	1	1	1	1	1	1	1	1	1	1	1	1	1	1	1	1	1	1	1
nanQ	nanQ	N-acetylneuraminate anomerase	568	568	1	1	1974	468	468	468	1	1	1	1	1	1	1	1	1	1	1	1	1	1	1	1	1	1	1	1	1	1	1	1	1	1	1	1	1	1	1	1	1	1	1	1	1	1	1
secB	secB	protein-export chaperone SecB	568	568	1	1	1973	468	468	468	1	1	1	1	1	1	1	1	1	1	1	1	1	1	1	1	1	1	1	1	1	1	1	1	1	1	1	1	1	1	1	1	1	1	1	1	1	1	1
atpF	atpF	F0F1 ATP synthase subunit B	568	568	1	1	1970	471	471	471	1	1	1	1	1	1	1	1	1	1	1	1	1	1	1	1	1	1	1	1	1	1	1	1	1	1	1	1	1	1	1	1	1	1	1	1	1	1	1
group_506	ribE	67-dimethyl-8-ribityllumazine synthase	568	568	1	1	1968	471	471	471	1	1	1	1	1	1	1	1	1	1	1	1	1	1	1	1	1	1	1	1	1	1	1	1	1	1	1	1	1	1	1	1	1	1	1	1	1	1	1
vsr	vsr	G:T-mismatch repair DNA endonuclease Vsr very short patch repair protein	568	568	1	1	1966	471	471	471	1	1	1	1	1	1	1	1	1	1	1	1	1	1	1	1	1	1	1	1	1	1	1	1	1	1	1	1	1	1	1	1	1	1	1	1	1	1	1
hycI	hycI	hydrogenase maturation peptidase HycI	568	568	1	1	1964	471	471	471	1	1	1	1	1	1	1	1	1	1	1	1	1	1	1	1	1	1	1	1	1	1	1	1	1	1	1	1	1	1	1	1	1	1	1	1	1	1	1
pulG	pulG	prepilin peptidase-dependent protein	568	568	1	1	1963	471	471	471	1	1	1	1	1	1	1	1	1	1	1	1	1	1	1	1	1	1	1	1	1	1	1	1	1	1	1	1	1	1	1	1	1	1	1	1	1	1	1
group_505	argR	transcriptional regulator ArgR	568	568	1	1	1962	471	471	471	1	1	1	1	1	1	1	1	1	1	1	1	1	1	1	1	1	1	1	1	1	1	1	1	1	1	1	1	1	1	1	1	1	1	1	1	1	1	1
accB	accB	acetyl-CoA carboxylase biotin carboxyl carrier protein	568	568	1	1	1961	471	471	471	1	1	1	1	1	1	1	1	1	1	1	1	1	1	1	1	1	1	1	1	1	1	1	1	1	1	1	1	1	1	1	1	1	1	1	1	1	1	1
rpsG	rpsG	30S ribosomal protein S7	568	568	1	1	1960	471	471	471	1	1	1	1	1	1	1	1	1	1	1	1	1	1	1	1	1	1	1	1	1	1	1	1	1	1	1	1	1	1	1	1	1	1	1	1	1	1	1
ybeY	ybeY	rRNA maturation RNase YbeY	568	568	1	1	1956	474	474	474	1	1	1	1	1	1	1	1	1	1	1	1	1	1	1	1	1	1	1	1	1	1	1	1	1	1	1	1	1	1	1	1	1	1	1	1	1	1	1
mntR	mntR	manganese-binding transcriptional regulator MntR	568	568	1	1	1955	474	474	474	1	1	1	1	1	1	1	1	1	1	1	1	1	1	1	1	1	1	1	1	1	1	1	1	1	1	1	1	1	1	1	1	1	1	1	1	1	1	1
gmm	gmm	GDP-mannose mannosyl hydrolase	568	568	1	1	1954	474	474	474	1	1	1	1	1	1	1	1	1	1	1	1	1	1	1	1	1	1	1	1	1	1	1	1	1	1	1	1	1	1	1	1	1	1	1	1	1	1	1
smg	smg	DUF494 domain-containing protein	568	568	1	1	1953	474	474	474	1	1	1	1	1	1	1	1	1	1	1	1	1	1	1	1	1	1	1	1	1	1	1	1	1	1	1	1	1	1	1	1	1	1	1	1	1	1	1
greB	greB	transcription elongation factor GreB	568	568	1	1	1952	474	474	474	1	1	1	1	1	1	1	1	1	1	1	1	1	1	1	1	1	1	1	1	1	1	1	1	1	1	1	1	1	1	1	1	1	1	1	1	1	1	1
hycB	hycB	Fe-S-cluster-containing hydrogenase component 2	568	568	1	1	1951	474	474	474	1	1	1	1	1	1	1	1	1	1	1	1	1	1	1	1	1	1	1	1	1	1	1	1	1	1	1	1	1	1	1	1	1	1	1	1	1	1	1
yiaM	yiaM	23-diketo-L-gulonate TRAP transporter small permease YiaM	568	568	1	1	1950	474	474	474	1	1	1	1	1	1	1	1	1	1	1	1	1	1	1	1	1	1	1	1	1	1	1	1	1	1	1	1	1	1	1	1	1	1	1	1	1	1	1
trmL	trmL	tRNA (uridine(34)/cytosine(34)/5-carboxymethylaminomethyluridine(34)-2'-O)-methyltransferase TrmL	568	568	1	1	1949	474	474	474	1	1	1	1	1	1	1	1	1	1	1	1	1	1	1	1	1	1	1	1	1	1	1	1	1	1	1	1	1	1	1	1	1	1	1	1	1	1	1
group_501	ptsN	Phosphotransferase system mannitol/fructose-specific IIA domain (Ntr-type)	568	568	1	1	1948	474	474	474	1	1	1	1	1	1	1	1	1	1	1	1	1	1	1	1	1	1	1	1	1	1	1	1	1	1	1	1	1	1	1	1	1	1	1	1	1	1	1
stfF	stfF	fimbrial minor subunit StfF	568	568	1	1	1947	477	477	477	1	1	1	1	1	1	1	1	1	1	1	1	1	1	1	1	1	1	1	1	1	1	1	1	1	1	1	1	1	1	1	1	1	1	1	1	1	1	1
ybhB	ybhB	kinase inhibitor	568	568	1	1	1946	477	477	477	1	1	1	1	1	1	1	1	1	1	1	1	1	1	1	1	1	1	1	1	1	1	1	1	1	1	1	1	1	1	1	1	1	1	1	1	1	1	1
group_500	citE	Citrate lyase beta subunit	568	568	1	1	1945	477	477	477	1	1	1	1	1	1	1	1	1	1	1	1	1	1	1	1	1	1	1	1	1	1	1	1	1	1	1	1	1	1	1	1	1	1	1	1	1	1	1
ybjN	ybjN	YbjN domain-containing protein	568	568	1	1	1944	477	477	477	1	1	1	1	1	1	1	1	1	1	1	1	1	1	1	1	1	1	1	1	1	1	1	1	1	1	1	1	1	1	1	1	1	1	1	1	1	1	1
greA	greA	transcription elongation factor GreA	568	568	1	1	1943	477	477	477	1	1	1	1	1	1	1	1	1	1	1	1	1	1	1	1	1	1	1	1	1	1	1	1	1	1	1	1	1	1	1	1	1	1	1	1	1	1	1
bfr	bfr	bacterioferritin	568	568	1	1	1942	477	477	477	1	1	1	1	1	1	1	1	1	1	1	1	1	1	1	1	1	1	1	1	1	1	1	1	1	1	1	1	1	1	1	1	1	1	1	1	1	1	1
folA	folA	type 3 dihydrofolate reductase	568	568	1	1	1941	480	480	480	1	1	1	1	1	1	1	1	1	1	1	1	1	1	1	1	1	1	1	1	1	1	1	1	1	1	1	1	1	1	1	1	1	1	1	1	1	1	1
eutP	eutP	ethanolamine utilization acetate kinase EutP	568	568	1	1	1939	480	480	480	1	1	1	1	1	1	1	1	1	1	1	1	1	1	1	1	1	1	1	1	1	1	1	1	1	1	1	1	1	1	1	1	1	1	1	1	1	1	1
rseC	rseC	SoxR-reducing system protein RseC	568	568	1	1	1938	480	480	480	1	1	1	1	1	1	1	1	1	1	1	1	1	1	1	1	1	1	1	1	1	1	1	1	1	1	1	1	1	1	1	1	1	1	1	1	1	1	1
ispF	ispF	2-C-methyl-D-erythritol 24-cyclodiphosphate synthase	568	568	1	1	1937	480	480	480	1	1	1	1	1	1	1	1	1	1	1	1	1	1	1	1	1	1	1	1	1	1	1	1	1	1	1	1	1	1	1	1	1	1	1	1	1	1	1
coaD	coaD	pantetheine-phosphate adenylyltransferase	568	568	1	1	1936	480	480	480	1	1	1	1	1	1	1	1	1	1	1	1	1	1	1	1	1	1	1	1	1	1	1	1	1	1	1	1	1	1	1	1	1	1	1	1	1	1	1
sscA	sscA	SycD/LcrH family type III secretion system chaperone SscA	568	568	1	1	1935	483	483	483	1	1	1	1	1	1	1	1	1	1	1	1	1	1	1	1	1	1	1	1	1	1	1	1	1	1	1	1	1	1	1	1	1	1	1	1	1	1	1
holC	holC	DNA polymerase III subunit chi	568	568	1	1	1931	483	483	483	1	1	1	1	1	1	1	1	1	1	1	1	1	1	1	1	1	1	1	1	1	1	1	1	1	1	1	1	1	1	1	1	1	1	1	1	1	1	1
iagB	iagB	SPI-1 type III secretion system invasion protein IagB	568	568	1	1	1927	483	483	483	1	1	1	1	1	1	1	1	1	1	1	1	1	1	1	1	1	1	1	1	1	1	1	1	1	1	1	1	1	1	1	1	1	1	1	1	1	1	1
dctM	dctM	TRAP-type C4-dicarboxylate transport system small permease component YiaM	568	568	1	1	1926	483	483	483	1	1	1	1	1	1	1	1	1	1	1	1	1	1	1	1	1	1	1	1	1	1	1	1	1	1	1	1	1	1	1	1	1	1	1	1	1	1	1
skp	skp	molecular chaperone Skp	568	568	1	1	1922	486	486	486	1	1	1	1	1	1	1	1	1	1	1	1	1	1	1	1	1	1	1	1	1	1	1	1	1	1	1	1	1	1	1	1	1	1	1	1	1	1	1
group_492		Cytoplasmic protein	568	568	1	1	1921	486	486	486	1	1	1	1	1	1	1	1	1	1	1	1	1	1	1	1	1	1	1	1	1	1	1	1	1	1	1	1	1	1	1	1	1	1	1	1	1	1	1
spy	spy	ATP-independent periplasmic protein-refolding chaperone Spy	568	568	1	1	1919	486	486	486	1	1	1	1	1	1	1	1	1	1	1	1	1	1	1	1	1	1	1	1	1	1	1	1	1	1	1	1	1	1	1	1	1	1	1	1	1	1	1
doxX	doxX	putative membrane protein YphA DoxX/SURF4 family	568	568	1	1	1918	486	486	486	1	1	1	1	1	1	1	1	1	1	1	1	1	1	1	1	1	1	1	1	1	1	1	1	1	1	1	1	1	1	1	1	1	1	1	1	1	1	1
agaB	agaB	Phosphotransferase system mannose/fructose/N-acetylgalactosamine-specific component IIB	568	568	1	1	1917	486	486	486	1	1	1	1	1	1	1	1	1	1	1	1	1	1	1	1	1	1	1	1	1	1	1	1	1	1	1	1	1	1	1	1	1	1	1	1	1	1	1
rfaH	rfaH	transcription/translation regulatory transformer protein RfaH	568	568	1	1	1913	489	489	489	1	1	1	1	1	1	1	1	1	1	1	1	1	1	1	1	1	1	1	1	1	1	1	1	1	1	1	1	1	1	1	1	1	1	1	1	1	1	1
argR	argR	Arginine repressor	568	568	1	1	1912	489	489	489	1	1	1	1	1	1	1	1	1	1	1	1	1	1	1	1	1	1	1	1	1	1	1	1	1	1	1	1	1	1	1	1	1	1	1	1	1	1	1
wcaB	wcaB	colanic acid biosynthesis acetyltransferase WcaB	568	568	1	1	1911	489	489	489	1	1	1	1	1	1	1	1	1	1	1	1	1	1	1	1	1	1	1	1	1	1	1	1	1	1	1	1	1	1	1	1	1	1	1	1	1	1	1
cvpA	cvpA	colicin V production protein	568	568	1	1	1910	489	489	489	1	1	1	1	1	1	1	1	1	1	1	1	1	1	1	1	1	1	1	1	1	1	1	1	1	1	1	1	1	1	1	1	1	1	1	1	1	1	1
hybE	hybE	hydrogenase-2 assembly chaperone	568	568	1	1	1909	489	489	489	1	1	1	1	1	1	1	1	1	1	1	1	1	1	1	1	1	1	1	1	1	1	1	1	1	1	1	1	1	1	1	1	1	1	1	1	1	1	1
yhhY	yhhY	N-acetyltransferase	568	568	1	1	1908	489	489	489	1	1	1	1	1	1	1	1	1	1	1	1	1	1	1	1	1	1	1	1	1	1	1	1	1	1	1	1	1	1	1	1	1	1	1	1	1	1	1
yajQ	yajQ	YajQ family cyclic di-GMP-binding protein	568	568	1	1	1907	492	492	492	1	1	1	1	1	1	1	1	1	1	1	1	1	1	1	1	1	1	1	1	1	1	1	1	1	1	1	1	1	1	1	1	1	1	1	1	1	1	1
napF	napF	ferredoxin-type protein NapF	568	568	1	1	1906	492	492	492	1	1	1	1	1	1	1	1	1	1	1	1	1	1	1	1	1	1	1	1	1	1	1	1	1	1	1	1	1	1	1	1	1	1	1	1	1	1	1
group_488		Fimbrial protein	568	568	1	1	1905	492	492	492	1	1	1	1	1	1	1	1	1	1	1	1	1	1	1	1	1	1	1	1	1	1	1	1	1	1	1	1	1	1	1	1	1	1	1	1	1	1	1
ptsN	ptsN	PTS IIA-like nitrogen regulatory protein PtsN	568	568	1	1	1904	492	492	492	1	1	1	1	1	1	1	1	1	1	1	1	1	1	1	1	1	1	1	1	1	1	1	1	1	1	1	1	1	1	1	1	1	1	1	1	1	1	1
mreD	mreD	rod shape-determining protein MreD	568	568	1	1	1903	492	492	492	1	1	1	1	1	1	1	1	1	1	1	1	1	1	1	1	1	1	1	1	1	1	1	1	1	1	1	1	1	1	1	1	1	1	1	1	1	1	1
ilvN	ilvN	acetolactate synthase small subunit	568	568	1	1	1900	495	495	495	1	1	1	1	1	1	1	1	1	1	1	1	1	1	1	1	1	1	1	1	1	1	1	1	1	1	1	1	1	1	1	1	1	1	1	1	1	1	1
tssE	tssE	type VI secretion system baseplate subunit TssE	568	568	1	1	1899	495	495	495	1	1	1	1	1	1	1	1	1	1	1	1	1	1	1	1	1	1	1	1	1	1	1	1	1	1	1	1	1	1	1	1	1	1	1	1	1	1	1
lrp	lrp	leucine-responsive transcriptional regulator Lrp	568	568	1	1	1898	495	495	495	1	1	1	1	1	1	1	1	1	1	1	1	1	1	1	1	1	1	1	1	1	1	1	1	1	1	1	1	1	1	1	1	1	1	1	1	1	1	1
yfbU	yfbU	YfbU family protein	568	568	1	1	1897	495	495	495	1	1	1	1	1	1	1	1	1	1	1	1	1	1	1	1	1	1	1	1	1	1	1	1	1	1	1	1	1	1	1	1	1	1	1	1	1	1	1
eutK	eutK	ethanolamine utilization microcompartment protein EutK	568	568	1	1	1896	495	495	495	1	1	1	1	1	1	1	1	1	1	1	1	1	1	1	1	1	1	1	1	1	1	1	1	1	1	1	1	1	1	1	1	1	1	1	1	1	1	1
iscR	iscR	Fe-S cluster assembly transcriptional regulator IscR	568	568	1	1	1895	495	495	495	1	1	1	1	1	1	1	1	1	1	1	1	1	1	1	1	1	1	1	1	1	1	1	1	1	1	1	1	1	1	1	1	1	1	1	1	1	1	1
ebgC	ebgC	Beta-galactosidase beta subunit	568	568	1	1	1893	495	495	495	1	1	1	1	1	1	1	1	1	1	1	1	1	1	1	1	1	1	1	1	1	1	1	1	1	1	1	1	1	1	1	1	1	1	1	1	1	1	1
yqhA	yqhA	UPF0114 protein YqhA	568	568	1	1	1892	495	495	495	1	1	1	1	1	1	1	1	1	1	1	1	1	1	1	1	1	1	1	1	1	1	1	1	1	1	1	1	1	1	1	1	1	1	1	1	1	1	1
ubiC	ubiC	chorismate lyase	568	568	1	1	1887	498	498	498	1	1	1	1	1	1	1	1	1	1	1	1	1	1	1	1	1	1	1	1	1	1	1	1	1	1	1	1	1	1	1	1	1	1	1	1	1	1	1
secM	secM	secA regulator SecM	568	568	1	1	1886	498	498	498	1	1	1	1	1	1	1	1	1	1	1	1	1	1	1	1	1	1	1	1	1	1	1	1	1	1	1	1	1	1	1	1	1	1	1	1	1	1	1
group_480	ftnA	non-heme ferritin	568	568	1	1	1885	498	498	498	1	1	1	1	1	1	1	1	1	1	1	1	1	1	1	1	1	1	1	1	1	1	1	1	1	1	1	1	1	1	1	1	1	1	1	1	1	1	1
pncC	pncC	nicotinamide-nucleotide amidase	568	568	1	1	1884	498	498	498	1	1	1	1	1	1	1	1	1	1	1	1	1	1	1	1	1	1	1	1	1	1	1	1	1	1	1	1	1	1	1	1	1	1	1	1	1	1	1
sicA	sicA	SycD/LcrH family type III secretion system chaperone SicA	568	568	1	1	1883	498	498	498	1	1	1	1	1	1	1	1	1	1	1	1	1	1	1	1	1	1	1	1	1	1	1	1	1	1	1	1	1	1	1	1	1	1	1	1	1	1	1
ygjP	ygjP	UTP pyrophosphatase metal-dependent hydrolase family	568	568	1	1	1882	498	498	498	1	1	1	1	1	1	1	1	1	1	1	1	1	1	1	1	1	1	1	1	1	1	1	1	1	1	1	1	1	1	1	1	1	1	1	1	1	1	1
[truncated: 3,682 more rows]
[truncated: 529 more columns]
